# Supplementary material for: Palladium(0)-catalyzed asymmetric C(sp3)–H arylation using a chiral binol-derived phosphate and an achiral ligand
Source: PubMed Central journal article supplement — Chem Sci. 2016 Oct 11;8(2):1344–9. doi: 10.1039/c6sc04006c (PMC5360168; doi:10.1039/c6sc04006c), 2016-10-11
Supplement: SC-008-C6SC04006C-s001.pdf [file SC-008-C6SC04006C-s001.pdf]

## **Palladium(0)-Catalyzed Asymmetric C(sp<sup>3</sup>)-H Arylation Using a Chiral Binol-Derived Phosphate and an Achiral Ligand**

Lei Yang, Romain Melot, Markus Neuburger, and Olivier Baudoin

*University of Basel, Department of Chemistry, St. Johannis-Ring 19, CH-4056 Basel, Switzerland*

*E-mail: olivier.baudoin@unibas.ch*

|                                                                                   |    |
|-----------------------------------------------------------------------------------|----|
| General Information .....                                                         | 2  |
| General procedures for substrates synthesis .....                                 | 4  |
| Palladium catalysed racemic and asymmetric synthesis of indolines .....           | 6  |
| Full optimization studies .....                                                   | 7  |
| Cleavage of the carbamate group and determination of absolute configuration ..... | 12 |
| Computational details (Figure 1) .....                                            | 49 |
| References .....                                                                  | 52 |
| NMR Spectra and chromatograms .....                                               | 54 |

## **General Information**

**Techniques:** All reactions involving air-sensitive material were carried out in pre-dried glassware under an argon atmosphere by using Schlenk techniques employing double-line argon-vacuum lines and working in an argon-filled glove box. Analytical thin layer chromatography (TLC) was performed using pre-coated *Merck silica gel 60 F254* plates (0.25 mm). Visualization of the developed chromatogram was performed by UV absorbance (254 nm) or TLC stains (KMnO<sub>4</sub> and Phosphomolybdic acid). Flash chromatography was performed using *Silicycle SiliaFlash P60* (230-400 mesh) with the indicated solvent system, using gradients of increasing polarity in most cases.

## **Chemicals**

Anhydrous solvents were obtained by distillation over calcium hydride (DIPEA, xylenes, and *t*-AmOH) or by distillation over sodium (mesitylene, cumene). Anhydrous THF, 2-Me THF, DME, DMF, DMSO, PhCl, PhCF<sub>3</sub>, *m*-xylene were purchased from Acros Organics. The solvents were degassed by three cycles of freeze-pump-thaw and storing in single-necked flasks equipped with a J-Young PTFE valve when necessary. Pd(PCy<sub>3</sub>)<sub>2</sub>, Pd(OAc)<sub>2</sub>, Pd<sub>2</sub>(dba)<sub>3</sub> were purchased from Strem. All other chemical reagents were purchased from Sigma-Aldrich, Acros Organics, Fisher, and Fluorochem and used as received without further purification unless otherwise stated. (*R*)-(-)-VAPOL hydrogenphosphate and (*R*)-TRIP were purchased from Sigma-Aldrich. All other chiral phosphoric acids were prepared in accordance with literature procedures.<sup>[1]</sup>

## **Instrumentation:**

GCMS analyses were performed with a Shimadzu QP2010SB GCMS apparatus on a Rtx<sup>®</sup>-5ms-Low-Bleed column lined with a mass (EI) detection system.

HPLC analyses were performed using a Shimadzu Prominence system with SIL-20A auto sample, CTO-20AC column oven, LC-20AD pump system, DGU-20A<sub>3</sub> degasser and SPD-M20A Diode Array or UV/VIS detector. The following chiral columns from Daicel Chemical Industries were used: OD-H (chiralcel), OJ-H (chiralcel) or IA (chiralpak) in 4.6 x 250 mm size.

Melting points were obtained on a Gallenkamp melting point apparatus and are uncorrected.

Infrared spectra were taken on a Bruker ALPHA FT-IR spectrometer and are reported in reciprocal centimeters ( $\text{cm}^{-1}$ ).

Nuclear magnetic resonance spectra were recorded on a Bruker Advance 400 (400 MHz) in deuterated chloroform (residual peaks  $^1\text{H}$   $\delta$  7.26 ppm,  $^{13}\text{C}$   $\delta$  77.16 ppm) unless otherwise noted.  $^{19}\text{F}$  NMR spectra were referenced to external  $\text{CFCl}_3$ . Data are reported in parts per million (ppm) as follows: chemical shift, multiplicity (s = singlet, d = doublet, t = triplet, q = quartet, quint = quintuplet, sept = septuplet, m = multiplet and bs = broad signal), coupling constant in Hz and integration.

High resolution mass spectra were recorded by Dr. H. Nadig (Department of Chemistry, University of Basel) on a Bruker maXis 4G QTOF ESI mass spectrometer.

X-ray crystallographic analysis was performed by Dr. M. Neuburger of the University of Basel. Optical rotations were measured on a Perkin Elmer 341 Polarimeter in a 1 mL micro cuvette (cell length 100mm) with  $\text{Na}_D$ -Line ( $\lambda = 589 \text{ nm}$ ) at  $20 \text{ }^\circ\text{C}$ . The concentration ( $c$ ) is given in g/100 mL.

Circular dichroism (CD) measurements were performed on a Chirascan CD Spectrometer in *n*-heptane at room temperature in 1cm quartz glass cuvettes after the Xray diffraction.

## General procedures for substrates synthesis

### Preparation of *N*-alkyl-*o*-haloarylamine derivatives

#### **General procedure A**<sup>[2]</sup>

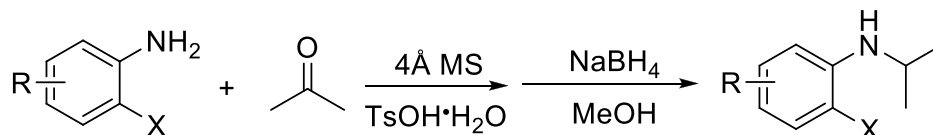

Molecular sieves (4 Å, 2.0 g/mmol), TsOH·H<sub>2</sub>O (0.2 eq.) were added to a solution of *o*-haloarylamine (1.0 eq.) in dry acetone (5 mL/mmol) and the resulting mixture was vigorously stirred at 50 °C for 12-48 h. It was filtered and the filtrate was evaporated to afford the crude imine. NaBH<sub>4</sub> (3.0 eq.) was added at 0 °C to a solution of this oil in methanol. The reaction mixture was stirred overnight, during which time the ice bath warmed up to ambient temperature. Then 1.0 M aq. NaOH solution was added and stirred for 10 min. The resulting mixture was extracted with CH<sub>2</sub>Cl<sub>2</sub> and the combined organic layers were dried over anhydrous Na<sub>2</sub>SO<sub>4</sub>. After removal of solvents, the crude product was purified by flash column chromatography using EtOAc–pentane mixture as an eluent.

#### **General procedure B**<sup>[3]</sup>

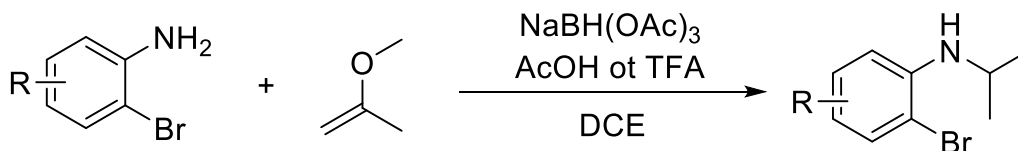

To a stirred solution of *o*-haloarylamine (1.0 eq.) in DCE (2-3 mL/mmol) under argon was added sequentially 2-methoxypropene (1.5 eq.), AcOH or TFA (1.0 eq.), NaBH(OAc)<sub>3</sub> (1.5 eq.). After stirring at r.t. for required time, the reaction mixture was quenched with aq. 1 N NaOH solution and extracted with CH<sub>2</sub>Cl<sub>2</sub>. The combined organic layers extracts were washed with brine, dried over Na<sub>2</sub>SO<sub>4</sub>, and concentrated under reduced pressure after filtration. If necessary, the crude product was purified by flash column chromatography using EtOAc–pentane mixture as an eluent.

#### **General procedure C**<sup>[4]</sup>

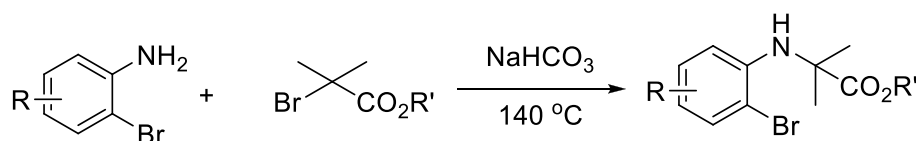

A mixture of *o*-bromoarylamine (1.0 eq.), sodium bicarbonate (1.5 eq.) and 2-bromo-2-methylpropanoate (1.68 eq.) was heated at 140 °C for 48 h. The reaction mixture was cooled down to room temperature and was directly purified by flash column chromatography on silica gel using EtOAc–pentane mixture as an eluent.

### Preparation of *N*-alkyl-*o*-haloarylcarbamate derivatives<sup>[5]</sup>

#### General procedure D

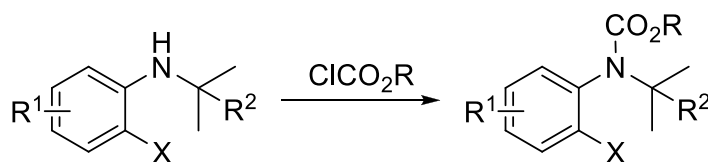

A mixture of *N*-alkyl-*o*-bromoarylamine in chloroformate (2-3 mL/mmol) was heated under reflux overnight. The mixture was poured into water and extracted with chloroform. The organic extracts were, dried over Na<sub>2</sub>SO<sub>4</sub>, and concentrated under reduced pressure after filtration. The crude material was purified by flash column chromatography using EtOAc–pentane mixture as an eluent.

## Palladium catalysed racemic and asymmetric synthesis of indolines

### **General procedure E: Representative procedure for the racemic synthesis of indolines**

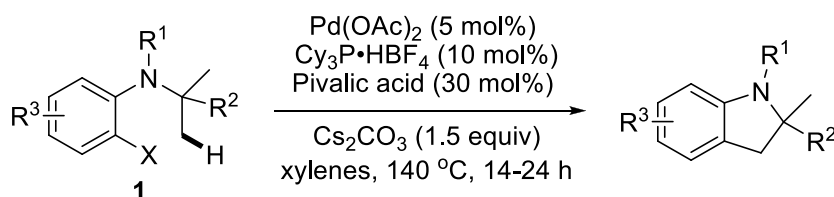

In the glovebox, **1** (0.2 mmol, 1.0 eq.),  $Pd(OAc)_2$  (0.05 eq.), pivalic acid (0.3 eq.), cesium carbonate (1.5 eq.) and  $PCy_3 \cdot BF_4$  (0.1 eq.) were successfully weighed and placed into a reaction tube. The tube was sealed with a rubber septum, taken out of the glovebox and degassed dry xylenes (2 mL/0.2 mmol **1**) were added under argon. The rubber septum was replaced with a Teflon screw cap and the reaction tube was sealed. The reaction mixture was heated at 140 °C in a preheated oil bath or a metal block with vigorous stirring for 14-16 h. The reaction mixture was cooled down to room temperature and was directly purified by flash column chromatography on silica gel using EtOAc–pentane mixture as an eluent to afford the desired racemic indoline.

### **General procedure F: Representative procedure for the asymmetric C(sp<sup>3</sup>)-H arylation**

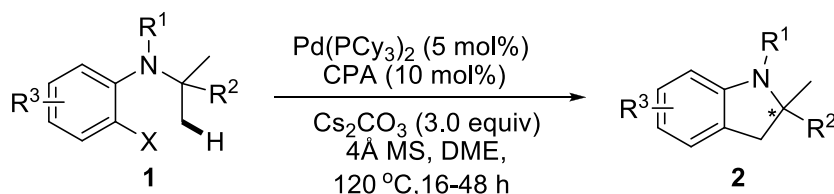

In the glovebox, **1** (0.2 mmol, 1.0 eq.),  $Pd(PCy_3)_2$  (0.05 eq.), chiral phosphoric acid (0.1 eq.), 4Å MS (50 mg/0.2 mmol **1**) and cesium carbonate (3.0 eq.) were successively weighed into a 25 mL J-Young tube equipped with a magnetic stir bar. The J-Young tube was sealed and taken out of the glovebox and dry DME (2 mL/0.2 mmol **1**) was added under argon. The reaction mixture was degassed by three freeze-pump-thaw cycles and was heated at 120 °C. After required time, the reaction mixture was cooled to room temperature and diluted with ethyl acetate followed by filtration through a pad of celite. The filtrate was evaporated under reduced pressure. The crude residue was purified by flash column chromatography on silica gel using EtOAc–pentane mixture as an eluent to afford the desired enantioenriched indoline **2**.

## Full optimization studies

**Table S1** Initial exploration of the enantioselective synthesis of indoline **2a**

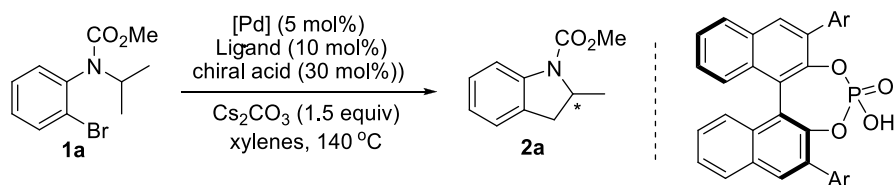

| Entry | Ar                                                                 | [Pd]                               | Ligand                             | Time (h) | Yield of <b>2a</b> (%) <sup>[a]</sup> | e.r. of <b>2a</b> <sup>[b]</sup> |
|-------|--------------------------------------------------------------------|------------------------------------|------------------------------------|----------|---------------------------------------|----------------------------------|
| 1     | H                                                                  | Pd(OAc) <sub>2</sub>               | PCy <sub>3</sub> .HBF <sub>4</sub> | 12       | 94                                    | 50:50                            |
| 2     | Ph                                                                 | Pd(OAc) <sub>2</sub>               | PCy <sub>3</sub> .HBF <sub>4</sub> | 12       | 86                                    | 50:50                            |
| 3     | 1-naphthyl                                                         | Pd(OAc) <sub>2</sub>               | PCy <sub>3</sub> .HBF <sub>4</sub> | 12       | 52                                    | 50:50                            |
| 4     | 2-naphthyl                                                         | Pd(OAc) <sub>2</sub>               | PCy <sub>3</sub> .HBF <sub>4</sub> | 12       | 76                                    | 50:50                            |
| 5     | 3,5-(CF <sub>3</sub> ) <sub>2</sub> -C <sub>6</sub> H <sub>3</sub> | Pd(OAc) <sub>2</sub>               | PCy <sub>3</sub> .HBF <sub>4</sub> | 12       | 86                                    | 54:46                            |
| 6     | 2-naphthyl                                                         | Pd(OAc) <sub>2</sub>               | -                                  | 12       | trace                                 | -                                |
| 7     | 2-naphthyl                                                         | Pd(OAc) <sub>2</sub>               | PCy <sub>3</sub>                   | 12       | 68                                    | 50:50                            |
| 8     | 3,5-(CF <sub>3</sub> ) <sub>2</sub> -C <sub>6</sub> H <sub>3</sub> | Pd(PCy <sub>3</sub> ) <sub>2</sub> | -                                  | 12       | 31                                    | 82:18                            |
| 9     | 3,5-(CF <sub>3</sub> ) <sub>2</sub> -C <sub>6</sub> H <sub>3</sub> | Pd(PCy <sub>3</sub> ) <sub>2</sub> | -                                  | 24       | 50                                    | 80:20                            |

<sup>[a]</sup> Isolated yield.

<sup>[b]</sup> Determined by HPLC using a chiral phase.

<sup>[c]</sup> 10 mol% of chiral phosphoric acid was used.

**Table S2** Screening of chiral phosphoric acids (CPAs)

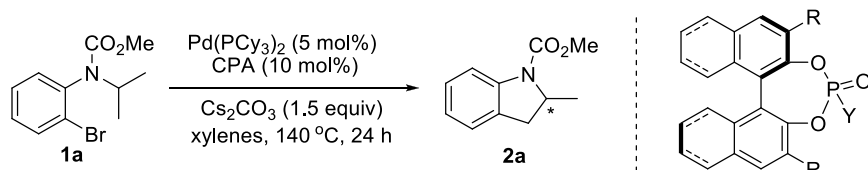

| Entry             | Chiral phosphoric acid                   |                 | Yield of <b>2a</b><br>(%) <sup>[a]</sup> | e.r. of <b>2a</b> <sup>[b]</sup> |
|-------------------|------------------------------------------|-----------------|------------------------------------------|----------------------------------|
|                   | R                                        | Y               |                                          |                                  |
| 1                 | Me                                       | OH              | 80                                       | 52:48                            |
| 2                 | Ph                                       | OH              | 65                                       | 50:50                            |
| 3                 | 4-biphenyl                               | OH              | 52                                       | 53:47                            |
| 4                 | 1-naphthyl                               | OH              | 71                                       | 53:47                            |
| 5                 | 2-naphthyl                               | OH              | 68                                       | 54:46                            |
| 6                 | 9-phenanthryl                            | OH              | 71                                       | 52:48                            |
| 7                 | 3',5'-bis(trifluoromethyl)biphenyl -4-yl | OH              | 50                                       | 58:52                            |
| 8                 | 4-nitrophenyl                            | OH              | 34                                       | 54:46                            |
| 9                 | 4-chlorophenyl                           | OH              | 47                                       | 54:46                            |
| 10                | 2,4,6-triisopropylphenyl                 | OH              | 21                                       | 56:14                            |
| 11                | perfluorophenyl                          | OH              | 31                                       | 50:50                            |
| 12                | 3,5-bis(methyl)phenyl                    | OH              | 39                                       | 57:43                            |
| 13                | 3,5-bis( <i>tert</i> -butyl)phenyl       | OH              | 63                                       | 55:45                            |
| 14                | 3,5-bis(isopropyl)phenyl                 | OH              | 45                                       | 56:44                            |
| 15                | 3,5-bis(nitro)phenyl                     | OH              | 50                                       | 57:43                            |
| <b>16</b>         | <b>3,5-bis(trifluoromethyl)phenyl</b>    | <b>OH</b>       | <b>50</b>                                | <b>80:20</b>                     |
| 17 <sup>[c]</sup> | 3,5-bis(trifluoromethyl)phenyl           | OH              | 55                                       | 88:12                            |
| 18 <sup>[c]</sup> | 3,5-bis(trifluoromethyl)phenyl           | NHTf            | 15                                       | 55:45                            |
| 19 <sup>[c]</sup> | 3,5-bis(trifluoromethyl)phenyl           | NH <sub>2</sub> | 50                                       | 84:16                            |
| 20                |                                          |                 | 79                                       | 50:50                            |
| 21                |                                          |                 | 52                                       | 50:50                            |
| 22                |                                          |                 | 63                                       | 50:50                            |

<sup>[a]</sup> Isolated yield.

<sup>[b]</sup> Determined by HPLC using a chiral phase.

<sup>[c]</sup> These reactions were run at 120 °C in the presence of 3.0 eq. Cs<sub>2</sub>CO<sub>3</sub> for 24 h.



**Table S3** Screening of bases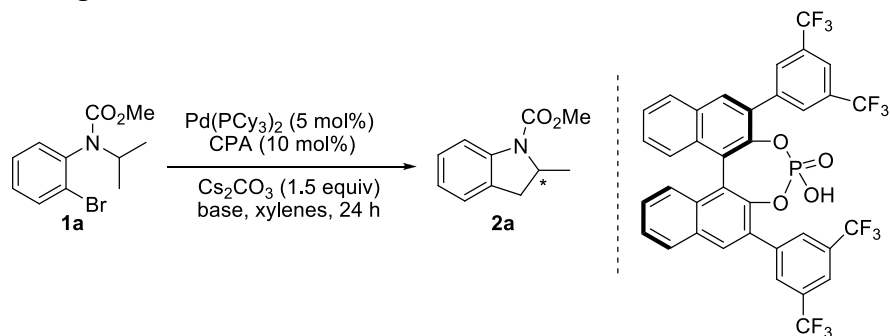

| Entry                  | Base                                | Temp.(°C)  | Time (h)  | Yield of <b>2a</b><br>(%) <sup>[a]</sup> | e.r. of <b>2a</b> <sup>[b]</sup> |
|------------------------|-------------------------------------|------------|-----------|------------------------------------------|----------------------------------|
| 1                      | Li <sub>2</sub> CO <sub>3</sub>     | 140        | 24        | 0                                        | -                                |
| 2                      | Na <sub>2</sub> CO <sub>3</sub>     | 140        | 24        | 0                                        | -                                |
| 3                      | K <sub>2</sub> CO <sub>3</sub>      | 140        | 24        | 26                                       | 50.5:49.5                        |
| 4                      | Rb <sub>2</sub> CO <sub>3</sub>     | 140        | 24        | 73                                       | 50:50                            |
| 5                      | CsOH                                | 140        | 24        | 29                                       | 79:21                            |
| 6                      | CsOPiv                              | 140        | 24        | 63                                       | 50:50                            |
| 7                      | KOAc                                | 140        | 24        | 16                                       | 50:50                            |
| 8                      | Cs <sub>2</sub> CO <sub>3</sub>     | 120        | 40        | 24                                       | 87:13                            |
| <b>9<sup>[c]</sup></b> | <b>Cs<sub>2</sub>CO<sub>3</sub></b> | <b>120</b> | <b>40</b> | <b>73</b>                                | <b>83:17</b>                     |

<sup>[a]</sup> Isolated yield.

<sup>[b]</sup> Determined by HPLC using a chiral phase.

<sup>[c]</sup> 3.0 eq. Cs<sub>2</sub>CO<sub>3</sub> was used.

**Table S4** Screening of solvents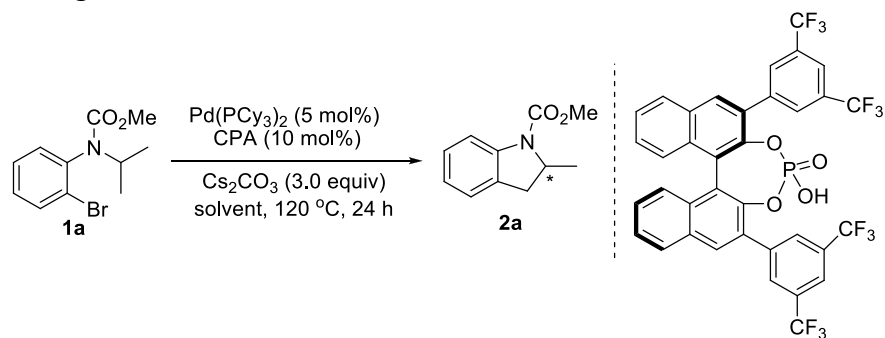

| Entry             | Solvent                        | Yield of <b>2a</b> (%) <sup>[a]</sup> | e.r. of <b>2a</b> <sup>[b]</sup> |
|-------------------|--------------------------------|---------------------------------------|----------------------------------|
| 1                 | xylenes                        | 56                                    | 84:16                            |
| 2                 | toluene                        | 64                                    | 88:12                            |
| 3                 | <i>m</i> -xylene               | 55                                    | 91:9                             |
| 4                 | cumene                         | 49                                    | 87:13                            |
| 5                 | mesitylene                     | 58                                    | 94:6                             |
| 6                 | CF <sub>3</sub> Ph             | 80                                    | 90:10                            |
| 7                 | PhCl                           | 26                                    | 90:10                            |
| 8                 | DME                            | 84                                    | 93:7                             |
| 9                 | THF                            | 55                                    | 94:6                             |
| 10                | 2-Me THF                       | 34                                    | 95:5                             |
| 11                | PhOMe                          | 60                                    | 89:11                            |
| 12                | ( <i>n</i> -Bu) <sub>2</sub> O | 82                                    | 62:38                            |
| 13                | 1,4-dioxane                    | -                                     | -                                |
| 14                | DMF                            | 44                                    | 74:26                            |
| 15                | DMSO                           | 25                                    | 50:50                            |
| 16                | <i>t</i> -AmOH                 | 42                                    | 51:49                            |
| 17                | HFIP                           | -                                     | -                                |
| 18 <sup>[c]</sup> | THF                            | 71                                    | 96:4                             |
| 19 <sup>[c]</sup> | <b>DME</b>                     | <b>86</b>                             | <b>96:4</b>                      |

<sup>[a]</sup> Isolated yield.

<sup>[b]</sup> Determined by HPLC using a chiral phase.

<sup>[c]</sup> 4Å MS (50 mg) was added as the additive.

**Table S5** Study of other reaction parameters (concentration, CPA and [Pd] loading)

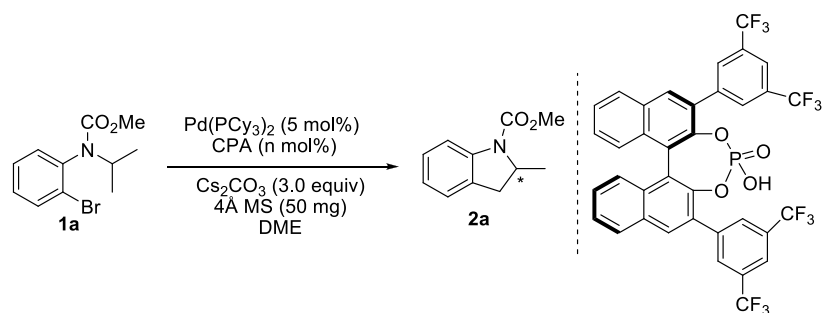

| Entry            | Concentration (M) | Temp. (°C) | Time (h) | n  | Yield of <b>2a</b> (%) <sup>[a]</sup> | e.r. of <b>2a</b> <sup>[b]</sup> |
|------------------|-------------------|------------|----------|----|---------------------------------------|----------------------------------|
| 1                | 0.1               | 120        | 16       | 5  | 73                                    | 95:5                             |
| 2                | 0.1               | 120        | 16       | 20 | 84                                    | 97.5:2.5                         |
| 3                | 0.1               | 120        | 16       | 30 | 84                                    | 97:3                             |
| 4                | 0.1               | 120        | 16       | 10 | 80                                    | 97:3                             |
| 5 <sup>[c]</sup> | 0.1               | 120        | 24       | 10 | 43                                    | 85:15                            |
| 6                | 0.1               | 100        | 24       | 10 | 44                                    | 97:3                             |
| 7                | 0.2               | 120        | 16       | 10 | 74                                    | 97:3                             |
| 8                | 0.05              | 120        | 16       | 10 | 87                                    | 93:7                             |

<sup>[a]</sup> Isolated yield.

<sup>[b]</sup> Determined by HPLC using a chiral phase.

<sup>[c]</sup> 2.5 mol% Pd(PCy<sub>3</sub>)<sub>2</sub> was used.

## Cleavage of the carbamate group and determination of absolute configuration

### *Trisubstituted indoline*

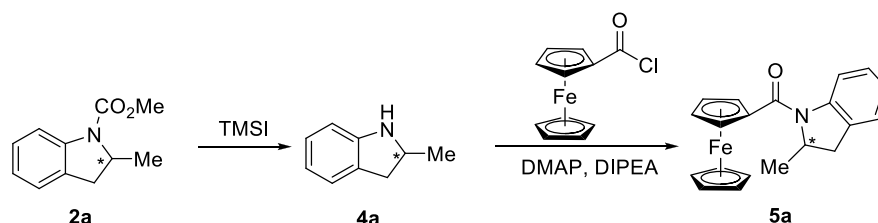

**Deprotection Step Employing TMSI.**<sup>[6]</sup> Under argon, TMSI (602  $\mu$ L, 4.24 mmol, 10 eq.) was added to a solution of **2a** (81 mg, 93.5:6.5 e.r., 0.424 mmol, 1.0 eq.) in  $\text{CHCl}_3$  (10 mL) at room temperature. After this time, the solvent was removed under reduced pressure and ammonia hydroxide (10 mL, 28%  $\text{NH}_3$  in  $\text{H}_2\text{O}$ ) was added. Once the phases were separated, the aqueous layer was extracted with  $\text{CH}_2\text{Cl}_2$  and the combined organic layers were dried over  $\text{Na}_2\text{SO}_4$ . After removing the solvent under reduced pressure, the crude amine **4a** was obtained as a colorless viscous oil, which was directly used in the next step.

**Amidation Step Employing DMAP/DIPEA.**<sup>[7]</sup> A round-bottom flask equipped with a magnetic stir bar was charged with crude **4a**. DCM (4 mL) was added and the mixture was cooled to 0  $^\circ\text{C}$ . DMAP (5.2 mg, 0.0424 mmol, 0.10 eq.) was added, followed by DIPEA (210  $\mu$ L, 1.27 mmol, 3.0 eq.) to give a clear solution. Ferrocene carboxylic acid chloride<sup>[8]</sup> (0.466 mmol, 116 mg, 1.1 eq.) in DCM (1 mL) was added last. The reaction was warmed to room temperature and stirred for 1 hour. The mixture was concentrated under reduced pressure to give the crude product, which was purified by flash column chromatography (silica gel, pentane/EtOAc 4:1 as the eluent) affording 121.3 mg of desired amide **5a** (0.35 mmol, 93:7 e.r., 83%, two steps) as an orange solid.

Suitable crystals for X-ray diffraction analysis were obtained from dichloromethane and pentane as solvent and anti-solvent, respectively.

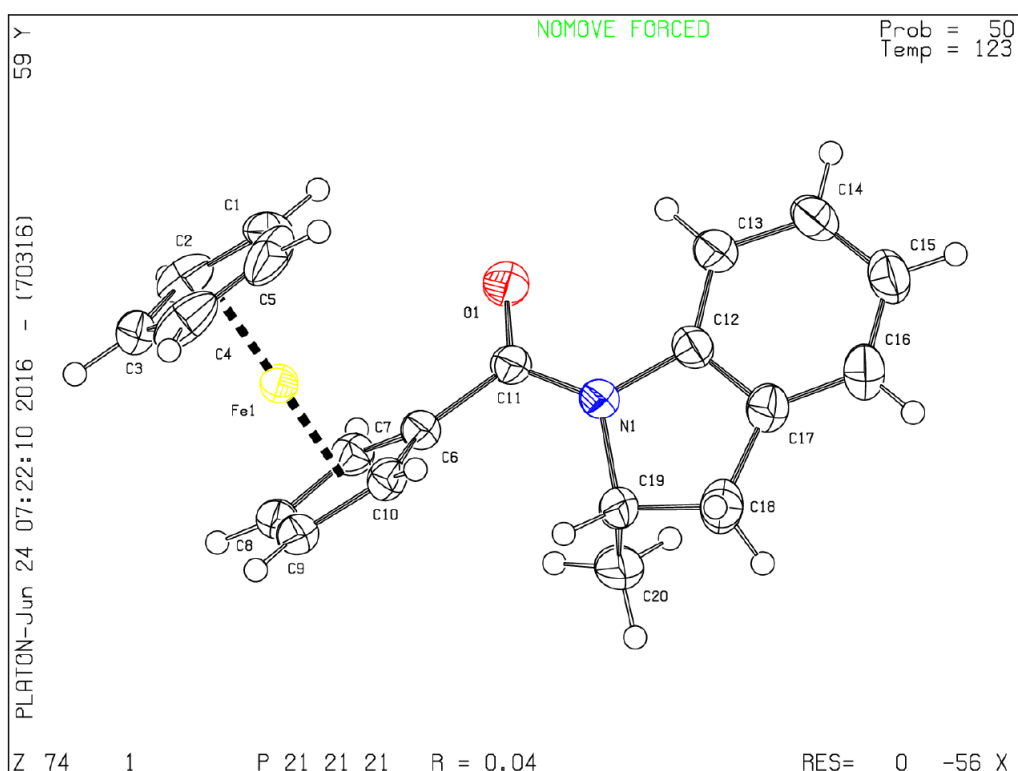

### ***Tetrasubstituted indoline***

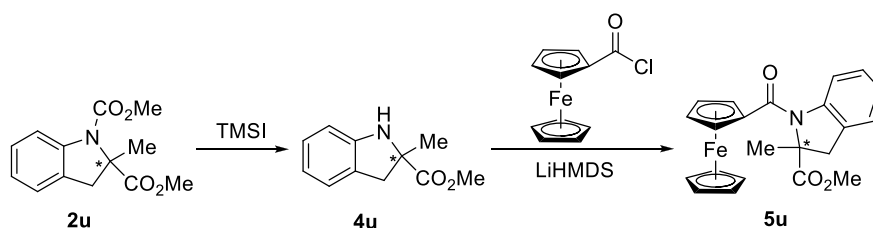

**Deprotection Step Employing TMSI.**<sup>[6]</sup> Under argon, TMSI (542  $\mu$ L, 3.8 mmol, 10 eq.) was added to a solution of **2u** (94 mg, 0.38 mmol, 90:10 e.r., 1.0 eq.) in  $\text{CHCl}_3$  (10 mL) at room temperature. The reaction mixture was refluxed for 20 h, then MeOH (10 mL) was added and the reaction was refluxed 3 h more. After this time, the solvent was removed under reduced pressure and ammonia hydroxide (10 mL, 28%  $\text{NH}_3$  in  $\text{H}_2\text{O}$ ) was added. Once the phases were separated, the aqueous layer was extracted with  $\text{CH}_2\text{Cl}_2$  and the combined organic layers were dried over  $\text{Na}_2\text{SO}_4$ . After removing the solvent under reduced pressure, the crude amine (71 mg) was obtained as a slight yellow viscous oil, which was directly used in the next step.

**Amidation Step Employing LiHMDS.**<sup>[9]</sup> To a solution of the crude amine **4u** in dry THF (5 mL) was added LiHMDS (0.45 mmol, 450  $\mu$ L, 1.0 M in THF, 1.2 eq.) dropwise at -78  $^{\circ}$ C under argon. The mixture was stirred for 10 min at -78  $^{\circ}$ C, then for 20 min at -10  $^{\circ}$ C. At this time, ferrocene carboxylic acid chloride (0.45 mmol, 112 mg, 1.2 eq.) was added in one portion and the mixture was stirred at -10  $^{\circ}$ C for 3 h. The reaction was quenched with saturated solution of  $\text{NH}_4\text{Cl}$  and extracted three times with ethyl acetate. The organic layers were combined and washed with water, brine, dried ( $\text{Na}_2\text{SO}_4$ ), and finally concentrated under reduced pressure. The crude product was purified by flash column chromatography (silica gel, pentane/EtOAc 10:1 as the eluent) affording 122 mg of desired amide **5u** (0.3 mmol, 90:10 e.r., 80%, two steps) as an orange solid.

Suitable crystals for X-ray diffraction analysis were obtained from diethyl ether and pentane as solvent and anti-solvent, respectively.

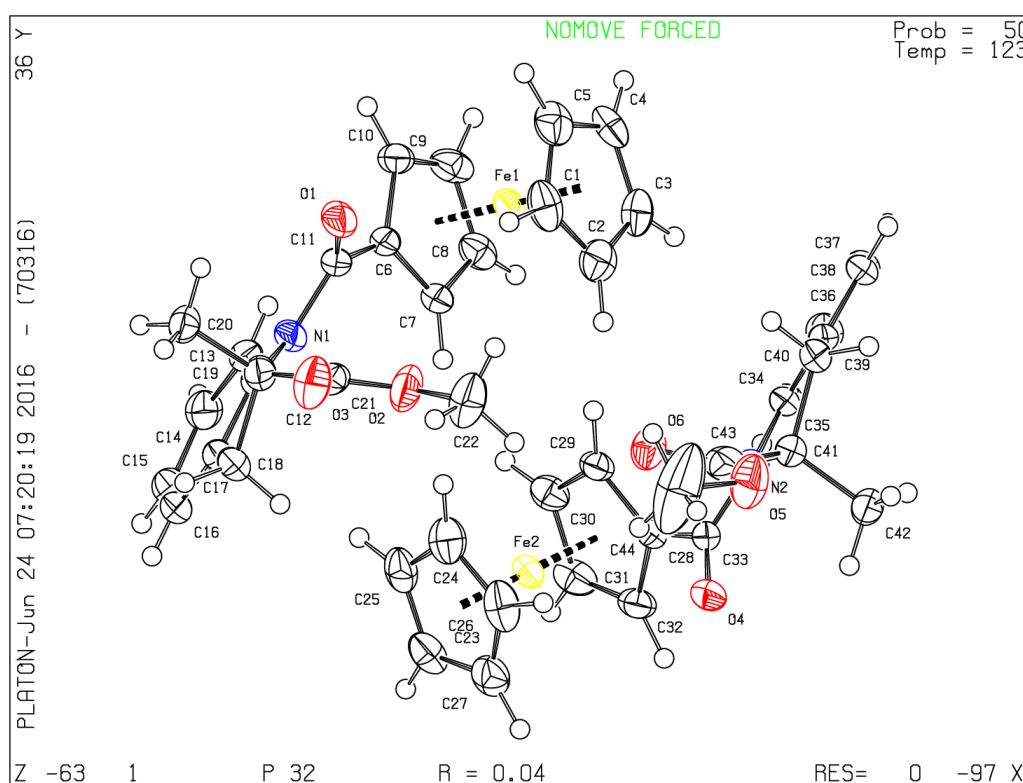

## Circular dichroism spectrum

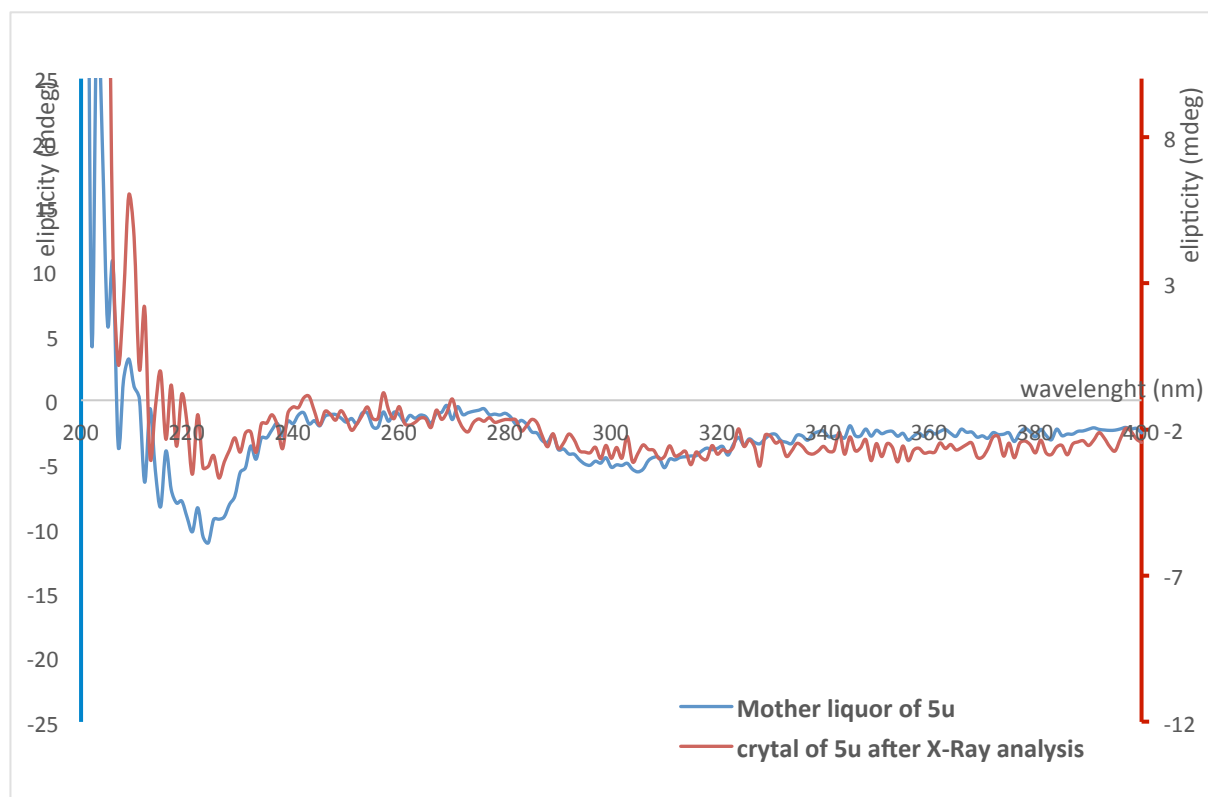

Figure S1

To avoid assigning the absolute configuration to the minor enantiomer, the circular dichroism spectrum of the solution prepared from the same single crystal of **5u**, which was analyzed by X-ray diffraction, was measured. It showed the same Cotton effect as the corresponding mother liquor, thereby showing that the major enantiomer was indeed analyzed by X-ray diffraction.

**methyl (2-chlorophenyl)(isopropyl)carbamate (1aCl):**

Obtained according to the *General procedure A and General procedure D*, as a slight yellow oil (65% yield over two steps).

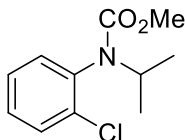

Chemical Formula: C<sub>11</sub>H<sub>14</sub>ClNO<sub>2</sub>  
Molecular Weight: 227,6880 g.mol<sup>-1</sup>

<sup>1</sup>H NMR (400 MHz, CDCl<sub>3</sub>): δ (ppm) 7.46-7.42 (m, 1H), 7.28-7.22 (m, 2H), 7.14-7.20 (m, 1H), 4.63-4.42 (m, 1H), 3.60 (s, 3H), 1.28 (d, *J* = 6.8 Hz, 3H), 1.02 (d, *J* = 6.8 Hz, 3H)

<sup>13</sup>C NMR (101 MHz, CDCl<sub>3</sub>): δ (ppm) 155.5, 136.8, 135.0, 130.9, 130.3, 128.8, 127.2, 52.9, 50.4, 22.5, 19.7

IR (neat): ν (cm<sup>-1</sup>) 2977, 2953, 1700, 1480, 1440, 1319, 1095, 756

HRMS (ESI): Calcd for C<sub>11</sub>H<sub>14</sub>ClNNaO<sub>2</sub> [M+Na]<sup>+</sup>: 250.0605, found 250.0605

**methyl (2-bromophenyl)(isopropyl)carbamate (1aBr):**

Obtained according to the *General procedure A and General procedure D*, as a white solid (83% yield over two steps).

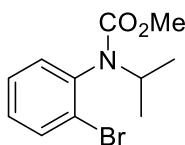

Chemical Formula: C<sub>11</sub>H<sub>14</sub>BrNO<sub>2</sub>  
Molecular Weight: 272,1420 g.mol<sup>-1</sup>

<sup>1</sup>H NMR (400 MHz, CDCl<sub>3</sub>): δ (ppm) 7.63 (dd, *J* = 7.9, 1.5 Hz, 1H), 7.31 (td, *J* = 7.9, 1.5 Hz, 1H), 7.22-7.13 (m, 2H), 4.58-4.42 (m, 1H), 3.61 (s, 3H), 1.31 (d, *J* = 6.8 Hz, 3H), 1.02 (d, *J* = 6.8 Hz, 3H)

<sup>13</sup>C NMR (101 MHz, CDCl<sub>3</sub>): δ (ppm) 155.3, 138.5, 133.5, 130.8, 129.0, 127.9, 126.0, 52.9, 50.4, 22.6, 19.7

IR (neat): ν (cm<sup>-1</sup>) 2977, 2951, 1693, 1323, 1096, 763

HRMS (ESI): Calcd for C<sub>11</sub>H<sub>14</sub>BrNNaO<sub>2</sub> [M+Na]<sup>+</sup>: 294.0100, found 294.0103

Mp: 49-51 °C



**methyl (2-iodophenyl)(isopropyl)carbamate (1a):**

Obtained according to the *General procedure A and General procedure D*, as a slight yellow solid (55% yield over two steps).

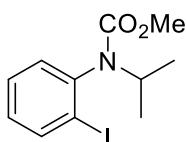

Chemical Formula:  $C_{11}H_{14}INO_2$   
Molecular Weight: 319,1425  $g \cdot mol^{-1}$

$^1H$  NMR (400 MHz,  $CDCl_3$ ):  $\delta$  (ppm) 7.90 (dd,  $J = 7.8, 1.3$  Hz, 1H), 7.36 (td,  $J = 7.8, 1.3$  Hz, 1H), 7.19 (d,  $J = 7.8$  Hz, 1H), 7.02 (td,  $J = 7.8, 1.6$  Hz, 1H), 4.55-4.41 (m, 1H), 3.64 (s, 3H), 1.35 (d,  $J = 6.7$  Hz, 3H), 1.03 (d,  $J = 6.7$  Hz, 3H)

$^{13}C$  NMR (101 MHz,  $CDCl_3$ ):  $\delta$  (ppm) 155.1, 142.1, 139.9, 129.8, 129.1, 128.9, 103.5, 52.9, 50.5, 22.9, 19.9

IR (neat):  $\nu$  ( $cm^{-1}$ ) 2974, 2948, 1694, 1439, 1334, 1323, 1091, 761

HRMS (ESI): Calcd for  $C_{11}H_{14}INNaO_2$  [ $M+Na$ ] $^+$ : 341.9961, found 341.9965

Mp: 72-75  $^{\circ}C$

**ethyl (2-bromophenyl)(isopropyl)carbamate (1b):**

Obtained according to the *General procedure A and General procedure D*, as a colorless viscous oil (81% yield over two steps).

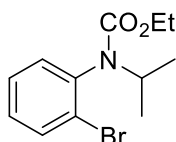

Chemical Formula:  $C_{12}H_{16}BrNO_2$   
Molecular Weight: 286,1690  $g \cdot mol^{-1}$

$^1H$  NMR (400 MHz,  $CDCl_3$ ):  $\delta$  (ppm) 7.63 (dd,  $J = 7.9, 1.4$  Hz, 1H), 7.31 (ddd,  $J = 7.9, 7.4, 1.4$  Hz, 1H), 7.23-7.15 (m, 2H), 4.61-4.46 (m, 1H), 4.23-3.95 (m, 2H), 1.31 (d,  $J = 6.7$  Hz, 3H), 1.16-1.09 (m, 2H), 1.03 (d,  $J = 6.7$  Hz, 3H)

$^{13}C$  NMR (101 MHz,  $CDCl_3$ ):  $\delta$  (ppm) 154.7, 138.5, 133.3, 130.7, 128.8, 127.8, 125.9, 61.4, 50.0, 22.6, 19.6, 14.6

IR (neat):  $\nu$  ( $cm^{-1}$ ) 2977, 2934, 1698, 1443, 1309, 1086, 752

HRMS (ESI): Calcd for  $C_{12}H_{16}CBrNNaO_2$  [ $M+Na$ ] $^+$ : 308.0257, found 308.0260

**benzyl (2-bromophenyl)(isopropyl)carbamate (1c):**

Obtained according to the *General procedure A and General procedure D*, as a white solid (45% yield over two steps).

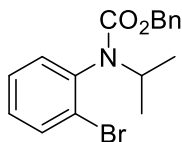

Chemical Formula:  $C_{17}H_{18}BrNO_2$   
Molecular Weight: 348,2400 g.mol<sup>-1</sup>

<sup>1</sup>H NMR (400 MHz, CDCl<sub>3</sub>): δ (ppm) 7.64 (d, *J* = 7.8 Hz, 1H), 7.49-7.10 (m, 8H), 5.32-5.01 (m, 2H), 4.63-4.40 (m, 1H), 1.33 (d, *J* = 6.7 Hz, 3H), 1.05 (d, *J* = 6.7 Hz, 3H)

<sup>13</sup>C NMR (101 MHz, CDCl<sub>3</sub>): δ (ppm) 154.7, 138.4, 136.8, 133.5, 130.9, 129.0, 128.3, 127.9, 127.7, 127.4, 126.0, 67.1, 50.5, 22.6, 19.7

IR (neat): ν (cm<sup>-1</sup>) 2980, 1691, 1404, 1307, 1085, 688

HRMS (ESI): Calcd for C<sub>17</sub>H<sub>18</sub>BrNNaO<sub>2</sub> [M+Na]<sup>+</sup>: 370.0413, found 370.0416

Mp: 56-58 °C

**isobutyl (2-bromophenyl)(isopropyl)carbamate (1d):**

Obtained according to the *General procedure A and General procedure D*, as a colorless viscous oil (77% yield over two steps).

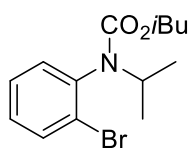

Chemical Formula:  $C_{14}H_{20}BrNO_2$   
Molecular Weight: 314,2230 g.mol<sup>-1</sup>

<sup>1</sup>H NMR (400 MHz, CDCl<sub>3</sub>): δ (ppm) 7.63 (d, *J* = 7.9 Hz, 1H), 7.33-7.28 (m, 1H), 7.25-7.13 (m, 2H), 4.63-4.28 (m, 1H), 4.11-3.70 (m, 2H), 1.80-1.64 (m, 1H), 1.31 (d, *J* = 6.7 Hz, 3H), 1.05 (d, *J* = 6.7 Hz, 3H), 0.71 (s, 6H)

<sup>13</sup>C NMR (101 MHz, CDCl<sub>3</sub>): δ (ppm) 155.0, 138.7, 133.4, 131.0, 128.9, 127.8, 126.2, 71.7, 50.0, 28.0, 22.7, 19.8, 19.1

IR (neat): ν (cm<sup>-1</sup>) 2960, 2874, 1697, 1314, 1087, 763

HRMS (ESI): Calcd for C<sub>14</sub>H<sub>20</sub>BrNNaO<sub>2</sub> [M+Na]<sup>+</sup>: 336.0570, found 336.0575

### ***N*-(2-bromophenyl)-*N*-isopropylisobutyramide (1e):**

Obtained according to the **General procedure A and General procedure D**, as a white solid (81% yield over two steps). Spectroscopic data are consistent with those previously reported.<sup>[10]</sup>

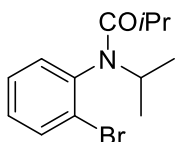

Chemical Formula: C<sub>13</sub>H<sub>18</sub>BrNO  
Molecular Weight: 284,1970 g.mol<sup>-1</sup>

<sup>1</sup>H NMR (400 MHz, CDCl<sub>3</sub>): δ (ppm) 7.71-7.67 (m, 1H), 7.40-7.35 (m, 1H), 7.26-7.21 (m, 2H), 4.85 (sept, *J* = 6.7 Hz, 1H), 2.10 (sept, *J* = 6.7 Hz, 1H), 1.23 (d, *J* = 6.5 Hz, 3H), 1.12 (d, *J* = 6.5 Hz, 3H), 0.96 (d, *J* = 6.7 Hz, 3H), 0.90 (d, *J* = 6.7 Hz, 3H)

<sup>13</sup>C NMR (101 MHz, CDCl<sub>3</sub>): δ (ppm) 177.0, 139.2, 134.0, 131.3, 129.6, 128.3, 126.7, 47.9, 32.9, 22.3, 20.1, 19.4, 19.3

### ***N*-(2-bromophenyl)-2,2,2-trifluoro-*N*-isopropylacetamide (1f):**

*N*-isopropyl-2-bromoaniline (Obtained according to the **General procedure A**) was mixed with TFAA (5 equiv.) and NEt<sub>3</sub> (1.5 equiv.), the mixture was stirred overnight at ambient temperature. Then the crude was concentrated under reduce pressure and purified by flash column chromatography with a mixture of pentane / AcOEt to give **1f** as a white solid (84% yield over two steps).

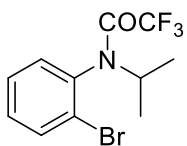

Chemical Formula: C<sub>11</sub>H<sub>11</sub>BrF<sub>3</sub>NO  
Molecular Weight: 310,1142 g.mol<sup>-1</sup>

<sup>1</sup>H NMR (400 MHz, CDCl<sub>3</sub>): δ (ppm) 7.68 (dd, *J* = 8.0, 1.6 Hz, 1H), 7.37 (td, *J* = 7.7, 1.6 Hz, 1H), 7.29 (td, *J* = 7.7, 1.6 Hz, 1H), 7.24 (dd, *J* = 7.7, 0.9 Hz, 1H), 4.59 (sept, *J* = 6.7 Hz, 1H), 1.34 (d, *J* = 6.7 Hz, 3H), 1.12 (d, *J* = 6.7 Hz, 3H)

<sup>13</sup>C NMR (101 MHz, CDCl<sub>3</sub>): δ (ppm) 156.6 (q, *J* = 35.4 Hz), 136.1, 133.9, 131.7, 130.8, 128.0, 125.8, 116.0 (q, *J* = 289.0 Hz), 52.7, 21.1, 18.8

<sup>19</sup>F NMR (376 MHz, CDCl<sub>3</sub>): δ (ppm) -69.13 (s)

IR (neat): ν (cm<sup>-1</sup>) 2985, 1682, 1473, 1187, 1146, 1110, 736, 700, 552

HRMS (ESI): Calcd for C<sub>11</sub>H<sub>11</sub>BrF<sub>3</sub>NNaO [M+Na]<sup>+</sup>: 331.9868, found 331.9868

Mp: 40-42 °C

***N*-(2-bromophenyl)-1,1,1-trifluoro-*N*-isopropylmethanesulfonamide (1g):**

Obtained according to the describe procedure of the Cramer group, as a white solid (44% yield over two steps). Spectroscopic data are consistent with those previously reported.<sup>[11]</sup>

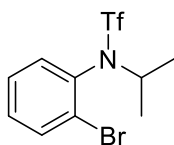

Chemical Formula: C<sub>10</sub>H<sub>11</sub>BrF<sub>3</sub>NO<sub>2</sub>S  
Molecular Weight: 346,1622 g.mol<sup>-1</sup>

<sup>1</sup>H NMR (400 MHz, CDCl<sub>3</sub>): δ (ppm) 7.74 (dd, *J* = 8.2, 1.5 Hz, 1H), 7.38 (ddd, *J* = 8.2, 6.9, 1.5 Hz, 1H), 7.33-7.27 (m, 2H), 4.55 (hept, *J* = 6.7 Hz, 1H), 1.32 (d, *J* = 6.7 Hz, 3H), 1.31 (d, *J* = 6.7 Hz, 3H)

<sup>13</sup>C NMR (101 MHz, CDCl<sub>3</sub>): δ (ppm) 134.8, 133.4, 133.3, 131.1, 128.1, 128.0, 120. (q, *J* = 323.8 Hz), 56.6, 22.2, 22.1

<sup>19</sup>F NMR (376 MHz, CDCl<sub>3</sub>): δ (ppm) -74.86 (s)

**methyl (2-bromo-4-fluorophenyl)(isopropyl)carbamate (1h):**

Obtained according to the **General procedure B and General procedure D**, as a colorless viscous oil (82% yield over two steps).

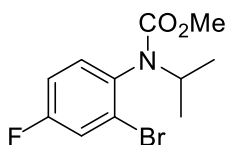

Chemical Formula: C<sub>11</sub>H<sub>13</sub>BrFNO<sub>2</sub>  
Molecular Weight: 290,1324 g.mol<sup>-1</sup>

<sup>1</sup>H NMR (400 MHz, CDCl<sub>3</sub>): 7.38 (dd, *J* = 8.0, 2.9 Hz, 1H), 7.16 (dd, *J* = 8.7, 5.6 Hz, 1H), 7.03 (ddd, *J* = 8.7, 7.7, 2.9 Hz, 1H), 4.59-4.40 (m, 1H), 3.62 (s, 3H), 1.29 (d, *J* = 6.8 Hz, 3H), 1.03 (d, *J* = 6.8 Hz, 3H)

<sup>13</sup>C NMR (101 MHz, CDCl<sub>3</sub>): δ (ppm) 161.3 (d, *J* = 251.5 Hz), 155.3, 134.8, 131.5 (d, *J* = 5.7 Hz), 126.5 (d, *J* = 10.0 Hz), 120.8 (d, *J* = 25.2 Hz), 115.0 (d, *J* = 21.9 Hz), 53.0, 50.4, 22.6, 19.8

<sup>19</sup>F NMR (376 MHz, CDCl<sub>3</sub>): δ (ppm) 112.22 (m).

IR (neat): ν (cm<sup>-1</sup>) 2980, 2957, 1696, 1442, 1314, 1257, 1094, 587

HRMS (ESI): Calcd for C<sub>11</sub>H<sub>13</sub>BrFNNaO<sub>2</sub> [M+Na]<sup>+</sup>: 312.0006, found 312.0007

**methyl (2-bromo-4-chlorophenyl)(isopropyl)carbamate (1i):**

Obtained according to the *General procedure A and General procedure D*, as a white solid (54% yield over two steps).

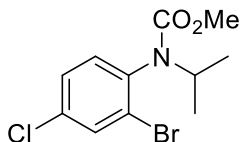

Chemical Formula: C<sub>11</sub>H<sub>13</sub>BrClNO<sub>2</sub>  
Molecular Weight: 306,5840 g.mol<sup>-1</sup>

<sup>1</sup>H NMR (400 MHz, CDCl<sub>3</sub>): δ (ppm) 7.64 (d, *J* = 2.4 Hz, 1H), 7.30 (dd, *J* = 8.4, 2.4 Hz, 1H), 7.12 (d, *J* = 8.4 Hz, 1H), 4.57-4.44 (m, 1H), 3.62 (s, 3H), 1.29 (d, *J* = 6.8 Hz, 3H), 1.03 (d, *J* = 6.8 Hz, 3H)

<sup>13</sup>C NMR (101 MHz, CDCl<sub>3</sub>): δ (ppm) 155.1, 137.3, 134.0, 133.3, 131.4, 128.2, 126.7, 53.0, 50.5, 22.6, 19.8

IR (neat): ν (cm<sup>-1</sup>) 3058, 2981, 2948, 1693, 1440, 1322, 1094, 766, 514

HRMS (ESI): Calcd for C<sub>11</sub>H<sub>13</sub>BrClNNO<sub>2</sub> [M+Na]<sup>+</sup>: 327.9710, found 327.9709

Mp: 43-45 °C

**methyl (2-bromo-4-methylphenyl)(isopropyl)carbamate (1j):**

Obtained according to the *General procedure A and General procedure D*, as a colorless oil (57% yield over two steps).

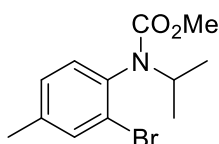

Chemical Formula: C<sub>12</sub>H<sub>16</sub>BrNO<sub>2</sub>  
Molecular Weight: 286,1690 g.mol<sup>-1</sup>

<sup>1</sup>H NMR (400 MHz, CDCl<sub>3</sub>): δ (ppm) 7.44 (s, 1H), 7.12-7.02 (m, 2H), 4.58-4.42 (m, 1H), 3.60 (s, 3H), 2.33 (s, 3H), 1.28 (d, *J* = 6.8 Hz, 3H), 1.01 (d, *J* = 6.8 Hz, 3H)

<sup>13</sup>C NMR (101 MHz, CDCl<sub>3</sub>): δ (ppm) 155.4, 139.2, 135.6, 133.9, 130.3, 128.6, 125.5, 52.8, 50.2, 22.6, 20.8, 19.7

IR (neat): ν (cm<sup>-1</sup>) 2978, 2949, 1696, 1440, 1318, 1094, 766

HRMS (ESI): Calcd for C<sub>12</sub>H<sub>16</sub>BrNNaO<sub>2</sub> [M+Na]<sup>+</sup>: 308.0257, found 308.0258

**methyl 3-bromo-4-(isopropyl(methoxycarbonyl)amino)benzoate (1k):**

Obtained according to the *General procedure B and General procedure D*, as a colorless oil (93% yield over two steps).

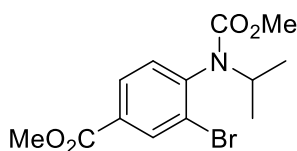

Chemical Formula: C<sub>13</sub>H<sub>16</sub>BrNO<sub>4</sub>  
Molecular Weight: 330,1780 g.mol<sup>-1</sup>

<sup>1</sup>H NMR (400 MHz, CDCl<sub>3</sub>): δ 8.30 (d, *J* = 2.0 Hz, 1H), 7.98 (dd, *J* = 8.2, 2.0 Hz, 1H), 7.26 (d, *J* = 8.2 Hz, 1H), 4.43-4.58 (m, 1H), 3.92 (s, 3H), 3.62 (s, 3H), 1.32 (d, *J* = 6.8 Hz, 3H), 1.03 (d, *J* = 6.8 Hz, 3H)

<sup>13</sup>C NMR (101 MHz, CDCl<sub>3</sub>): δ (ppm) 165.4, 154.8, 142.9, 134.7, 130.8, 130.6, 129.2, 126.2, 53.0, 52.6, 50.7, 22.7, 19.8

IR (neat): ν (cm<sup>-1</sup>) 2977, 2952, 1716, 1439, 1279, 1098, 764, 732

HRMS (ESI): Calcd for C<sub>13</sub>H<sub>16</sub>BrNNaO<sub>4</sub> [M+Na]<sup>+</sup>: 352.0155, found 352.0153

**methyl (2-bromo-4-cyanophenyl)(isopropyl)carbamate (1l):**

Obtained according to the *General procedure A and General procedure D*, as a white solid (18% yield over two steps).

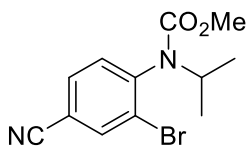

Chemical Formula: C<sub>12</sub>H<sub>13</sub>BrN<sub>2</sub>O<sub>2</sub>  
Molecular Weight: 297,1520 g.mol<sup>-1</sup>

<sup>1</sup>H NMR (400 MHz, CDCl<sub>3</sub>): δ (ppm) 7.93 (d, *J* = 1.9 Hz, 1H), 7.63 (dd, *J* = 8.1, 1.9 Hz, 1H), 7.30 (d, *J* = 8.1 Hz, 1H), 4.58-4.42 (m, 1H), 3.63 (s, 3H), 1.32 (d, *J* = 6.8 Hz, 3H), 1.03 (d, *J* = 6.8 Hz, 3H)

<sup>13</sup>C NMR (101 MHz, CDCl<sub>3</sub>): δ (ppm) 154.5, 143.5, 136.9, 131.7, 131.4, 127.0, 117.0, 113.0, 53.1, 50.9, 22.7, 19.8

IR (neat): ν (cm<sup>-1</sup>) 2981, 2951, 2228, 1695, 1443, 1331, 1306, 1096, 764

HRMS (ESI): Calcd for C<sub>12</sub>H<sub>13</sub>BrN<sub>2</sub>NaO<sub>2</sub> [M+Na]<sup>+</sup>: 319.0053, found 319.0053

Mp: 125-127 °C

**methyl (2-bromo-5-fluorophenyl)(isopropyl)carbamate (1m):**

Obtained according to the *General procedure B and General procedure D*, as a white solid (76% yield over two steps).

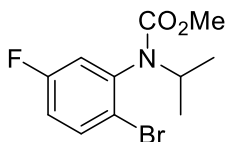

Chemical Formula: C<sub>11</sub>H<sub>13</sub>BrFNO<sub>2</sub>  
Molecular Weight: 290,1324 g.mol<sup>-1</sup>

<sup>1</sup>H NMR (400 MHz, CDCl<sub>3</sub>): δ (ppm) 7.62-7.56 (m, 1H), 6.98-6.91 (m, 2H), 4.58-4.42 (m, 1H), 3.65 (s, 3H), 1.32 (d, *J* = 6.8 Hz, 3H), 1.05 (d, *J* = 6.8 Hz, 3H)

<sup>13</sup>C NMR (101 MHz, CDCl<sub>3</sub>): δ (ppm) 161.7 (d, *J* = 248.7 Hz), 155.0, 139.9, 134.1 (d, *J* = 8.6 Hz), 120.6 (d, *J* = 3.9 Hz), 118.3 (d, *J* = 22.0 Hz), 116.3 (d, *J* = 22.1 Hz), 53.0, 50.6, 22.7, 19.7

<sup>19</sup>F NMR (376 MHz, CDCl<sub>3</sub>): δ (ppm) -113.33 to -113.41 (m)

IR (neat): ν (cm<sup>-1</sup>) 2976, 1699, 1441, 1332, 1318, 1096, 819, 764, 598

HRMS (ESI): Calcd for C<sub>12</sub>H<sub>16</sub>BrNNaO<sub>2</sub> [M+Na]<sup>+</sup>: 312.0006, found 312.0008

Mp: 58-61 °C

**methyl (2-bromo-5-(trifluoromethyl)phenyl)(isopropyl)carbamate (1n):**

Obtained according to the *General procedure B and General procedure D*, as a white solid (50% yield over two steps).

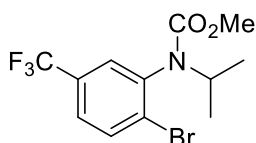

Chemical Formula: C<sub>12</sub>H<sub>13</sub>BrF<sub>3</sub>NO<sub>2</sub>  
Molecular Weight: 340,1402 g.mol<sup>-1</sup>

<sup>1</sup>H NMR (400 MHz, CDCl<sub>3</sub>): δ (ppm) 7.77 (d, *J* = 8.3 Hz, 1H), 7.46-7.41 (m, 2H), 4.59-4.45 (m, 1H), 3.64 (s, 3H), 1.33 (d, *J* = 6.8 Hz, 3H), 1.04 (d, *J* = 6.8 Hz, 3H)

<sup>13</sup>C NMR (101 MHz, CDCl<sub>3</sub>): δ (ppm) 154.9, 139.5, 134.2, 130.7 (q, *J* = 33.3 Hz), 130.4, 127.6, 125.7, 123.5 (q, *J* = 272.5 Hz), 53.1, 50.7, 22.7, 19.8

<sup>19</sup>F NMR (376 MHz, CDCl<sub>3</sub>): δ (ppm) -62.69 (s).

IR (neat): ν (cm<sup>-1</sup>) 2982, 2954, 1700, 1442, 1319, 1114, 1077, 846

HRMS (ESI): Calcd for C<sub>12</sub>H<sub>13</sub>BrF<sub>3</sub>NNaO<sub>2</sub> [M+Na]<sup>+</sup>: 361.9974, found 361.9978

Mp: 89-92 °C

**methyl (2-bromo-5-(dimethylamino)phenyl)(isopropyl)carbamate (1o):**

methyl (2-bromo-5-nitrophenyl)(isopropyl)carbamate [Obtained according to the **General procedure B and General procedure D**, as a white solid (32% yield over two steps)] (1.0 g, 3.2 mmol) was dissolved in MeCN (70 mL), ZnBr (3.6 g, 16.0 mmol, 5 eq.) and a 37 % aqueous formaldehyde solution (12 mL) was added. After the addition of 10 % Pd/C (341 mg, 0.32 mmol, 10 mol%), the solution was purged with hydrogen and stirred under a hydrogen atmosphere (1 bar) for 24 h. The catalyst was filtered off and the filtrate was concentrated under reduced pressure. The residue was purified by flash column chromatography using an EtOAc-pentane mixture to give **1o** as a white solid (520 mg, 1.65 mmol, 52 %).

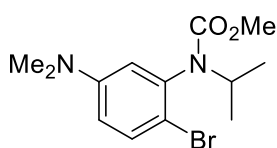

Chemical Formula: C<sub>13</sub>H<sub>19</sub>BrN<sub>2</sub>O<sub>2</sub>  
Molecular Weight: 315,2110 g.mol<sup>-1</sup>

<sup>1</sup>H NMR (400 MHz, CDCl<sub>3</sub>): δ (ppm) 7.40 (d, *J* = 8.8 Hz, 1H), 6.56-6.47 (m, 2H), 4.57-4.45 (m, 1H), 3.64 (s, 3H), 2.94 (s, 6H), 1.33 (d, *J* = 6.7 Hz, 3H), 1.05 (d, *J* = 6.7 Hz, 3H)

<sup>13</sup>C NMR (101 MHz, CDCl<sub>3</sub>): δ (ppm) 155.6, 150.2, 138.6, 133.2, 114.5, 112.9, 111.4, 52.9, 50.3, 40.5, 22.9, 19.7

IR (neat): ν (cm<sup>-1</sup>) 2978, 2923, 1705, 1690, 1440, 1317, 1098

HRMS (ESI): Calcd for C<sub>12</sub>H<sub>16</sub>BrNNO<sub>2</sub> [M+Na]<sup>+</sup>: 337.0522, found 337.0524

Mp: 66-69 °C

**methyl (2-bromo-5-methylphenyl)(isopropyl)carbamate (1p):**

Obtained according to the **General procedure A and General procedure D**, as white solid (52% yield over two steps).

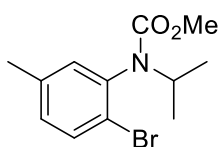

Chemical Formula: C<sub>12</sub>H<sub>16</sub>BrNO<sub>2</sub>  
Molecular Weight: 286,1690 g.mol<sup>-1</sup>

<sup>1</sup>H NMR (400 MHz, CDCl<sub>3</sub>): δ (ppm) 7.44 (s, 1H), 7.11-7.02 (m, 2H), 4.58-4.44 (m, 1H), 3.60 (s, 2H), 2.33 (s, 3H), 1.28 (d, *J* = 6.8 Hz, 3H), 1.01 (d, *J* = 6.8 Hz, 3H)

<sup>13</sup>C NMR (101 MHz, CDCl<sub>3</sub>): δ (ppm) 155.4, 139.2, 135.6, 133.9, 130.3, 128.6, 125.5, 52.8, 50.2, 22.6, 20.8, 19.7

IR (neat): ν (cm<sup>-1</sup>) 2975, 2955, 1697, 1441, 1320, 1095, 822, 768

HRMS (ESI): Calcd for C<sub>12</sub>H<sub>16</sub>BrNNO<sub>2</sub> [M+Na]<sup>+</sup>: 308.0257, found 308.0257

Mp: 46-48 °C



**methyl (2-bromo-5-methoxyphenyl)(isopropyl)carbamate (1q):**

Obtained according to the *General procedure A and General procedure D*, as a white solid (83% yield over two steps).

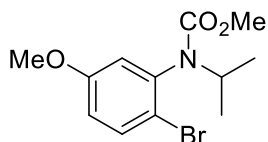

Chemical Formula: C<sub>12</sub>H<sub>16</sub>BrNO<sub>3</sub>  
Molecular Weight: 302,1680 g.mol<sup>-1</sup>

<sup>1</sup>H NMR (400 MHz, CDCl<sub>3</sub>): δ (ppm) 7.52-7.46 (m, 1H), 6.78-6.72 (m, 2H), 4.59-4.41 (m, 1H), 3.79 (s, 3H), 3.63 (s, 3H), 1.32 (d, *J* = 6.8 Hz, 3H), 1.04 (d, *J* = 6.8 Hz, 3H)

<sup>13</sup>C NMR (101 MHz, CDCl<sub>3</sub>): δ (ppm) 159.2, 155.3, 139.2, 133.5, 116.4, 116.4, 114.3, 55.7, 52.9, 50.4, 22.7, 19.7

IR (neat): ν (cm<sup>-1</sup>) 2983, 2953, 1697, 1445, 1320, 1308, 1218, 1097

HRMS (ESI): Calcd for C<sub>12</sub>H<sub>16</sub>BrNNaO<sub>3</sub> [M+Na]<sup>+</sup>: 324.0206, found 324.0205

Mp: 55-57 °C

**methyl (2-bromo-6-fluorophenyl)(isopropyl)carbamate (1r):**

Obtained according to the *General procedure B and General procedure D*, as a white solid (23% yield over two steps).

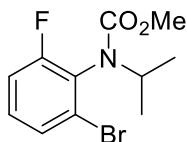

Chemical Formula: C<sub>11</sub>H<sub>13</sub>BrFNO<sub>2</sub>  
Molecular Weight: 290,1324 g.mol<sup>-1</sup>

<sup>1</sup>H NMR (400 MHz, CDCl<sub>3</sub>): δ (ppm) 7.41 (d, *J* = 7.9 Hz, 1H), 7.20-7.05 (m, 2H), 4.37-4.15 (m, 1H), 3.60 (s, 3H), 1.32 (dd, *J* = 6.7, 1.8 Hz, 3H), 1.15 (d, *J* = 6.7 Hz, 3H)

<sup>13</sup>C NMR (101 MHz, CDCl<sub>3</sub>): δ (ppm) 160.0 (d, *J* = 251.4 Hz), 155.0, 129.6 (d, *J* = 8.8 Hz), 128.7 (d, *J* = 3.5 Hz), 127.0, 115.6 (d, *J* = 22.0 Hz), 53.0, 51.9, 21.4, 20.2

<sup>19</sup>F NMR (376 MHz, CDCl<sub>3</sub>): δ (ppm) -112.56 to -112.71 (m)

IR (neat): ν (cm<sup>-1</sup>) 2977, 2951, 1707, 1440, 1089, 866, 768

HRMS (ESI): Calcd for C<sub>12</sub>H<sub>13</sub>BrN<sub>2</sub>NaO<sub>2</sub> [M+Na]<sup>+</sup>: 312.0006, found 312.0007

Mp: 48-49 °C

**methyl (2-bromo-4,6-dimethylphenyl)(isopropyl)carbamate (1s):**

Obtained according to the *General procedure B and General procedure D*, as a colorless viscous oil (39% yield over two steps).

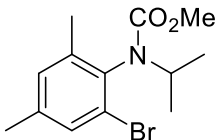

Chemical Formula: C<sub>13</sub>H<sub>18</sub>BrNO<sub>2</sub>  
Molecular Weight: 300,1960 g.mol<sup>-1</sup>

<sup>1</sup>H NMR (400 MHz, CDCl<sub>3</sub>): δ (ppm) 7.28-7.26 (m, 1H), 6.99-6.98 (m, 1H), 4.10 (hept, *J* = 6.7 Hz, 1H), 3.60 (s, 3H), 2.29 (s, 3H), 2.23 (s, 3H), 1.32 (d, *J* = 6.7 Hz, 3H), 1.16 (d, *J* = 6.7 Hz, 4H)

<sup>13</sup>C NMR (101 MHz, CDCl<sub>3</sub>): δ (ppm) 155.6, 139.0, 138.7, 136.6, 131.3, 130.7, 125.6, 52.8, 51.6, 22.0, 20.9, 20.8, 19.7

IR (neat): ν (cm<sup>-1</sup>) 2972, 2950, 1706, 1439, 1339, 1316, 1087

HRMS (ESI): Calcd for C<sub>13</sub>H<sub>18</sub>BrNNaO<sub>2</sub> [M+Na]<sup>+</sup>: 322.0413, found 322,0416

**methyl (2-bromopyridin-3-yl)(isopropyl)carbamate (1t):**

Obtained according to the *General procedure B and General procedure D*, as a colorless viscous oil (64% yield over two steps).

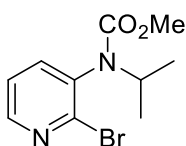

Chemical Formula: C<sub>10</sub>H<sub>13</sub>BrN<sub>2</sub>O<sub>2</sub>  
Molecular Weight: 273,1300 g.mol<sup>-1</sup>

Mixture or rotameres:

<sup>1</sup>H NMR (400 MHz, CDCl<sub>3</sub>): δ (ppm) 8.25 (dd, *J* = 4.7, 1.8 Hz, 2/3 H), 8.22 (dd, *J* = 4.7, 1.8 Hz, 1/3 H), 7.48-7.41 (m, 2H), 7.22 (dd, *J* = 7.8, 4.7 Hz, dd, *J* = 7.8, 4.7 Hz superimposed, 1H), 4.55-4.35 (m, 2H), 3.53 (s, 4H), 1.21 (d, *J* = 6.8 Hz, 1H), 1.18 (d, *J* = 6.7 Hz, 2H), 0.97 (d, *J* = 6.8 Hz, 3H, d, *J* = 6.8 Hz superimposed, 3H)

<sup>13</sup>C NMR (101 MHz, CDCl<sub>3</sub>): δ (ppm) 154.8, 152.3, 148.3, 148.0, 145.8, 139.2, 138.5, 136.0, 133.6, 122.9, 122.7, 52.8, 50.4, 50.3, 22.5, 22.3, 19.7

IR (neat): ν (cm<sup>-1</sup>) 2978, 2951, 1703, 1401, 1316, 1097, 1077, 768

HRMS (ESI): Calcd for C<sub>10</sub>H<sub>13</sub>BrN<sub>2</sub>NaO<sub>2</sub> [M+Na]<sup>+</sup>: 295.0053, found 295.0052

**methyl 2-((2-bromophenyl)(methoxycarbonyl)amino)-2-methylpropanoate (1u):**

Obtained according to the *General procedure C and General procedure D*, as a white solid (40% yield over two steps).

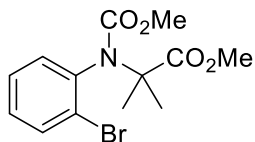

Chemical Formula:  $C_{13}H_{16}BrNO_4$   
Molecular Weight: 330,1780 g.mol<sup>-1</sup>

<sup>1</sup>H NMR (400 MHz, CDCl<sub>3</sub>): δ (ppm) 7.65-7.58 (m, 1H), 7.56-7.51 (m, 1H), 7.35-7.29 (m, 1H), 7.21-7.14 (m, 1H), 3.78 (s, 3H), 3.56 (s, 3H), 1.77 (s, 3H), 1.14 (s, 3H)

<sup>13</sup>C NMR (101 MHz, CDCl<sub>3</sub>): δ (ppm) 175.5, 155.2, 138.9, 133.2, 132.1, 129.5, 127.9, 126.0, 62.9, 53.2, 52.7, 26.0, 24.9

IR (neat): ν (cm<sup>-1</sup>) 2960, 2930, 1733, 1703, 1337, 1267, 1151, 1088, 756

HRMS (ESI): Calcd for C<sub>13</sub>H<sub>16</sub>BrNNaO<sub>4</sub> [M+Na]<sup>+</sup>: 352.0155, found 352,0160

Mp: 71-73 °C

**ethyl 2-((2-bromophenyl)(methoxycarbonyl)amino)-2-methylpropanoate (1v):**

Obtained according to the *General procedure C and General procedure D*, as a colorless oil (19% yield over two steps).

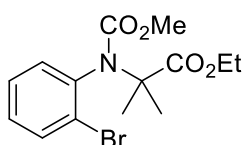

Chemical Formula:  $C_{14}H_{18}BrNO_4$   
Molecular Weight: 344,2050 g.mol<sup>-1</sup>

<sup>1</sup>H NMR (400 MHz, CDCl<sub>3</sub>): δ (ppm) 7.59 (dd, *J* = 8.9, 1.4 Hz, 1H), 7.52 (dd, *J* = 7.9, 1.6 Hz, 1H), 7.29 (td, *J* = 7.7, 1.4 Hz, 1H), 7.18-7.12 (m, 1H), 4.22 (q, *J* = 7.2 Hz, 2H), 3.53 (s, 3H), 1.75 (s, 3H), 1.28 (t, *J* = 7.1 Hz, 3H), 1.12 (s, 3H)

<sup>13</sup>C NMR (101 MHz, CDCl<sub>3</sub>): δ (ppm) 174.7, 155.1, 138.9, 133.1, 131.9, 129.3, 127.8, 125.9, 62.8, 61.3, 53.0, 25.9, 24.7, 14.2

IR (neat): ν (cm<sup>-1</sup>) 2982, 2956, 1735, 1711, 1337, 1147, 1092, 729

HRMS (ESI): Calcd for C<sub>14</sub>H<sub>18</sub>BrNNaO<sub>4</sub> [M+Na]<sup>+</sup>: 366.0311, found 366.0312

**methyl 2-(((benzyloxy)carbonyl)(2-bromophenyl)amino)-2-methylpropanoate (1w):**

Obtained according to the *General procedure C and General procedure D*, as a colorless oil (26% yield over two steps).

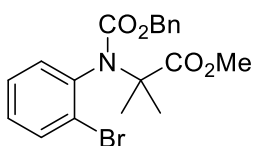

Chemical Formula: C<sub>19</sub>H<sub>20</sub>BrNO<sub>4</sub>  
Molecular Weight: 406,2760 g.mol<sup>-1</sup>

<sup>1</sup>H NMR (400 MHz, CDCl<sub>3</sub>): δ (ppm) 7.64 (dd, *J* = 8.0, 1.5 Hz, 1H), 7.56 (dd, *J* = 8.0, 1.5 Hz, 1H), 7.39-7.29 (m, 2H), 7.25-7.16 (m, 5H), 7.13-7.08 (m, 2H), 5.06 (s, 2H), 3.77 (s, 3H), 1.82 (s, 3H), 1.17 (s, 3H)

<sup>13</sup>C NMR (101 MHz, CDCl<sub>3</sub>): δ (ppm) 175.5, 154.6, 138.9, 136.7, 133.3, 132.1, 129.5, 128.3, 127.9, 127.7, 127.2, 126.1, 67.2, 63.0, 52.7, 26.0, 24.9

IR (neat): ν (cm<sup>-1</sup>) 2993, 2950, 1740, 1707, 1295

HRMS (ESI): Calcd for C<sub>19</sub>H<sub>20</sub>BrNNaO<sub>4</sub> [M+Na]<sup>+</sup>: 428.0468, found 428.0474

**methyl 2-((2-bromo-5-methylphenyl)(methoxycarbonyl)amino)-2-methylpropanoate (1x):**

Obtained according to the *General procedure C and General procedure D*, as a white solid (25% yield over two steps).

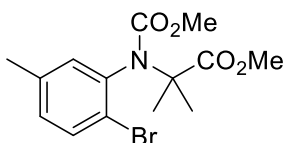

Chemical Formula: C<sub>14</sub>H<sub>18</sub>BrNO<sub>4</sub>  
Molecular Weight: 344,2050 g.mol<sup>-1</sup>

<sup>1</sup>H NMR (400 MHz, CDCl<sub>3</sub>): δ (ppm) 7.47 (d, *J* = 8.2 Hz, 1H), 7.33 (s, 1H), 6.99 (dd, *J* = 8.2, 1.4 Hz, 1H), 3.79 (s, 3H), 3.58 (s, 3H), 2.31 (s, 3H), 1.77 (s, 3H), 1.15 (s, 3H)

<sup>13</sup>C NMR (101 MHz, CDCl<sub>3</sub>): δ (ppm) 175.6, 155.3, 138.4, 138.1, 132.8, 132.5, 130.4, 122.4, 62.9, 53.2, 52.7, 26.1, 24.9, 20.9

IR (neat): ν (cm<sup>-1</sup>) 2994, 2954, 1742, 1707, 1333, 1142, 1096

HRMS (ESI): Calcd for C<sub>14</sub>H<sub>18</sub>BrNNaO<sub>4</sub> [M+Na]<sup>+</sup>: 366.0311, found 366.0318

Mp: 98-99 °C

**methyl 2-((2-bromo-4-fluorophenyl)(methoxycarbonyl)amino)-2-methylpropanoate (1y):**

Obtained according to the *General procedure C and General procedure D*, as a white solid (36% yield over two steps).

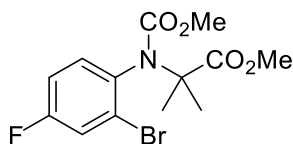

Chemical Formula:  $C_{13}H_{15}BrFNO_4$   
Molecular Weight: 348,1684  $g \cdot mol^{-1}$

$^1H$  NMR (400 MHz,  $CDCl_3$ ):  $\delta$  (ppm) 7.54 (dd,  $J = 8.8, 5.7$  Hz, 1H), 7.35 (dd,  $J = 7.5, 2.0$  Hz, 1H), 7.06-7.00 (m, 1H), 3.79 (s, 3H), 3.58 (s, 3H), 1.78 (s, 3H), 1.13 (s, 3H)

$^{13}C$  NMR (101 MHz,  $CDCl_3$ ):  $\delta$  (ppm) 175.4, 161.5 (d,  $J = 252.3$  Hz), 155.3, 135.3 (d,  $J = 3.5$  Hz), 132.8 (d,  $J = 8.9$  Hz), 126.4 (d,  $J = 10.1$  Hz), 120.3 (d,  $J = 25.2$  Hz), 115.1 (d,  $J = 21.9$  Hz), 63.0, 53.2, 52.7, 26.1, 24.9

$^{19}F$  NMR (376 MHz,  $CDCl_3$ ):  $\delta$  (ppm) -111.33 (s)

IR (neat):  $\nu$  ( $cm^{-1}$ ) 2996, 2954, 1736, 1703, 1335, 1094

HRMS (ESI): Calcd for  $C_{13}H_{15}BrFNNaO_4$   $[M+Na]^+$ : 370.0061, found 370.0061

Mp: 86-87 °C

**methyl 2-((2-bromo-4-methylphenyl)(methoxycarbonyl)amino)-2-methylpropanoate (1y):**

Obtained according to the *General procedure C and General procedure D*, as a white solid (36% yield over two steps).

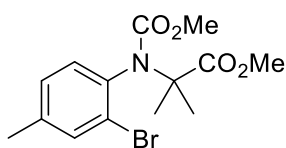

Chemical Formula:  $C_{14}H_{18}BrNO_4$   
Molecular Weight: 344,2050  $g \cdot mol^{-1}$

$^1H$  NMR (400 MHz,  $CDCl_3$ ):  $\delta$  (ppm) 7.54 (dd,  $J = 8.8, 5.7$  Hz, 1H), 7.35 (dd,  $J = 7.5, 2.0$  Hz, 1H), 7.06-7.00 (m, 1H), 3.79 (s, 3H), 3.58 (s, 3H), 1.78 (s, 3H), 1.13 (s, 3H)

$^{13}C$  NMR (101 MHz,  $CDCl_3$ ):  $\delta$  (ppm) 175.4, 161.5 (d,  $J = 252.3$  Hz), 155.3, 135.3 (d,  $J = 3.5$  Hz), 132.8 (d,  $J = 8.9$  Hz), 126.4 (d,  $J = 10.1$  Hz), 120.3 (d,  $J = 25.2$  Hz), 115.1 (d,  $J = 21.9$  Hz), 63.0, 53.2, 52.7, 26.1, 24.9

$^{19}F$  NMR (376 MHz,  $CDCl_3$ ):  $\delta$  (ppm) -111.33 (s).

IR (neat):  $\nu$  ( $cm^{-1}$ ) 2996, 2954, 1740, 1708, 1336, 1094

HRMS (ESI): Calcd for  $C_{14}H_{18}BrNNaO_4$   $[M+Na]^+$ : 366.0311, found 366.0313

Mp: 105-107 °C

**methyl (2-bromophenyl)(cyclobutyl)carbamate (1aa):**

Obtained according to the *General procedure B and General procedure D*, as a white solid (66% yield over two steps). Spectroscopic data are consistent with those previously reported.<sup>[12]</sup>

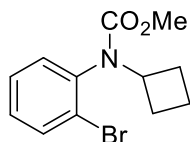

Chemical Formula: C<sub>12</sub>H<sub>14</sub>BrNO<sub>2</sub>  
Molecular Weight: 284,1530 g.mol<sup>-1</sup>

<sup>1</sup>H NMR (400 MHz, CDCl<sub>3</sub>): δ (ppm) 7.65 (dd, *J* = 7.9, 1.6 Hz, 1H), 7.35 (td, *J* = 7.6, 1.6 Hz, 1H), 7.20 (td, *J* = 7.9, 1.6 Hz, 1H), 7.16 (d, *J* = 7.6 Hz, 1H), 4.83-4.71 (m, 1H), 3.61 (s, 3H), 2.24-2.09 (m, 2H), 1.90 (quint, *J* = 10.0 Hz, 1H), 1.84-1.70 (m, 1H), 1.65-1.44 (m, 2H)  
<sup>13</sup>C NMR (101 MHz, CDCl<sub>3</sub>): δ (ppm) 155.4, 138.2, 133.4, 131.6, 129.2, 128.1, 125.9, 53.0, 52.6, 29.5, 28.5, 15.2

**methyl (2-bromo-4-fluorophenyl)(cyclobutyl)carbamate (1ab):**

Obtained according to the *General procedure B and General procedure D*, as a pale viscous oil (62% yield over two steps).

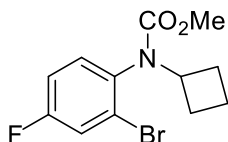

Chemical Formula: C<sub>12</sub>H<sub>13</sub>BrFNO<sub>2</sub>  
Molecular Weight: 302,1434 g.mol<sup>-1</sup>

<sup>1</sup>H NMR (400 MHz, CDCl<sub>3</sub>): δ (ppm) 7.35 (dd, *J* = 7.8, 2.9 Hz, 1H), 7.16-7.07 (m, 1H), 7.03 (ddd, *J* = 8.7, 7.8, 2.9 Hz, 1H), 4.81-4.66 (m, 1H), 3.57 (s, 3H), 2.21-2.05 (m, 2H), 1.84 (quint, *J* = 10.0 Hz, 1H), 1.78-1.66 (m, 1H), 1.61-1.43 (m, 2H)  
<sup>13</sup>C NMR (101 MHz, CDCl<sub>3</sub>): δ (ppm) 161.3 (d, *J* = 251.7 Hz), 155.2, 134.4, 132.2 (d, *J* = 8.1 Hz), 126.2 (d, *J* = 9.6 Hz), 120.5 (d, *J* = 25.3 Hz), 115.0 (d, *J* = 22.0 Hz), 52.9, 52.4, 29.3, 28.4, 15.0

<sup>19</sup>F NMR (376 MHz, CDCl<sub>3</sub>): δ (ppm) -111.87 to -111.95 (m)

IR (neat): ν (cm<sup>-1</sup>) 2979, 2950, 1706, 1489, 1441, 1321, 1294, 878

HRMS (ESI): Calcd for C<sub>12</sub>H<sub>13</sub>BrFNaO<sub>2</sub> [M+Na]<sup>+</sup>: 324.0006, found 324.0006

**methyl (2-bromophenyl)(sec-butyl)carbamate (1ac):**

Obtained according to the *General procedure A and General procedure D*, as a colorless oil (77% yield over two steps). Spectroscopic data are consistent with those previously reported.<sup>[13]</sup>

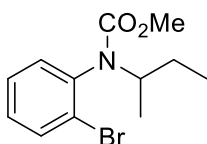

Chemical Formula: C<sub>12</sub>H<sub>16</sub>BrNO<sub>2</sub>  
Molecular Weight: 286,1690 g.mol<sup>-1</sup>

<sup>1</sup>H NMR (400 MHz, CDCl<sub>3</sub>): δ (ppm) 7.63 (dd, *J* = 7.9, 3.7 Hz, 1H), 7.35-7.28 (m, 1H), 7.23-7.12 (m, 2H), 4.44-4.02 (m, 1H), 3.63 (s, 3H), 1.86-1.71 (m, 1H), 1.61-1.47 (m, 1H), 1.34 (d, *J* = 6.7 Hz, 1H), 1.04-0.96 (m, 4H), 0.89 (t, *J* = 7.4 Hz, 1H).

<sup>13</sup>C NMR (101 MHz, CDCl<sub>3</sub>): δ (ppm) 155.6, 155.1, 139.5, 138.3, 133.4, 130.4, 128.8, 128.7, 127.9, 126.1, 125.6, 57.4, 55.8, 52.8, 52.7, 29.7, 26.8, 19.2, 16.7, 11.6, 11.1

## methyl (S)-2-methylindoline-1-carboxylate (2a):

### Small scale synthesis:

**1aCl** as the substrate: The title compound was prepared according to the **General procedure F** (0.2 mmol scale, 140 °C/26 h) and purified by chromatography to give a slight yellow oil (12.8 mg, 34% yield).

**1aBr** as the substrate: The title compound was prepared according to the **General procedure F** (0.2 mmol scale, 120 °C/24 h) and purified by chromatography to give a slight yellow oil (32.7 mg, 86% yield).

**1aI** as the substrate: The title compound was prepared according to the **General procedure F** (0.2 mmol scale, 120 °C/20 h) and purified by chromatography to give a slight yellow oil (25.8 mg, 68% yield).

**Gram scale synthesis:** In the glovebox, carbamate **1a** (5.0 mmol, 1.36 g, 1.0 eq.), Pd(PCy<sub>3</sub>)<sub>2</sub> (0.25 mmol, 167 mg, 0.05 eq.), chiral phosphoric acid (0.5 mmol, 385 mg, 0.1 eq.), 4Å MS (1.25 g) and cesium carbonate (15 mmol, 4.9 g, 3.0 eq.) were successfully weighed into a 100 mL J-Young tube equipped with a magnetic stir bar. The J-Young tube was sealed and taken out of the glovebox and dry DME (40 mL) was added under argon. The reaction mixture was degassed by three freeze-pump-thaw cycles and was heated at 120 °C for 24 h. The reaction mixture was cooled to room temperature and filtered through a pad of celite, washed with ethyl acetate. The filtrate was evaporated under reduced pressure. The crude residue was purified by flash column chromatography (silica gel, pentane/EtOAc 30:1 as the eluent) affording 825 mg (4.32 mmol, 86%) of a slight yellow oil. Spectroscopic data are consistent with those previously reported.<sup>[14]</sup>

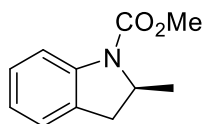

Chemical Formula: C<sub>11</sub>H<sub>13</sub>NO<sub>2</sub>  
Molecular Weight: 191,2300 g.mol<sup>-1</sup>

<sup>1</sup>H NMR (400 MHz, CDCl<sub>3</sub>): δ (ppm) 7.80 (bs, 1H), 7.22-7.12 (m, 2H), 6.96 (td, *J* = 7.4, 1.0 Hz, 1H), 4.62-4.48 (m, 1H), 3.85 (s, 3H), 3.36 (dd, *J* = 15.9, 9.6 Hz, 1H), 2.63 (dd, *J* = 15.9, 2.1 Hz, 1H), 1.30 (d, *J* = 6.4 Hz, 3H)

<sup>13</sup>C NMR (101 MHz, CDCl<sub>3</sub>): δ (ppm) 153.7, 141.5, 130.1, 127.5, 125.1, 122.8, 115.4, 55.4, 52.5, 35.9, 21.2

IR (neat): ν (cm<sup>-1</sup>) 2953, 2926, 1703, 1485, 1389, 753

HRMS (ESI): Calcd for C<sub>11</sub>H<sub>13</sub>NNaO<sub>2</sub> [M+Na]<sup>+</sup>: 214.0844, found 214,0837

[α]<sub>D</sub><sup>20</sup> = +40.8° (c = 1.46, CHCl<sub>3</sub>); lit. +48.3 (c = 0.8, CH<sub>2</sub>Cl<sub>2</sub>).<sup>[14]</sup>



**HPLC separation:** Chiralcel OJ-H; 99:1 (*n*-heptane/*i*-PrOH), 1.0 ml.min<sup>-1</sup>, 243 nm, t<sub>r</sub>(minor) = 9.6 min, t<sub>r</sub>(major) = 10.6 min, 96:4 e.r.

**ethyl (S)-2-methylindoline-1-carboxylate (2b):**

The title compound was prepared according to the **General procedure F** (0.2 mmol scale, 120 °C/16 h) and purified by chromatography to give a colorless oil (34.1 mg, 83% yield).

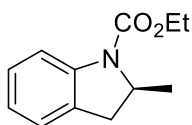

Chemical Formula: C<sub>12</sub>H<sub>15</sub>NO<sub>2</sub>  
Molecular Weight: 205,2570 g.mol<sup>-1</sup>

<sup>1</sup>H NMR (400 MHz, CDCl<sub>3</sub>): δ (ppm) 7.81 (bs, 1H), 7.23-7.12 (m, 2H), 6.96 (td, *J* = 7.4, 1.0 Hz, 1H), 4.64-4.47 (m, 1H), 4.30 (q, *J* = 7.0 Hz, 2H), 3.37 (dd, *J* = 15.9, 9.6 Hz, 2H), 2.63 (dd, *J* = 15.9, 2.0 Hz, 1H), 1.37 (t, *J* = 7.0 Hz, 3H), 1.30 (d, *J* = 6.3 Hz, 3H)

<sup>13</sup>C NMR (101 MHz, CDCl<sub>3</sub>): δ (ppm) 153.3, 141.6, 130.2, 127.5, 125.1, 122.7, 115.5, 61.4, 55.4, 35.9, 21.2, 14.8

**IR** (neat): ν (cm<sup>-1</sup>) 2978, 2929, 1698, 1484, 1280, 1053, 748

**HRMS (ESI):** Calcd for C<sub>12</sub>H<sub>15</sub>NNaO<sub>2</sub> [M+Na]<sup>+</sup>: 228.1000, found 228,0995

[α]<sub>D</sub><sup>20</sup> = +40.1° (c = 0.85, CHCl<sub>3</sub>)

**HPLC separation:** Chiralcel OJ-H; 99:1 (*n*-heptane/*i*-PrOH), 1.0 ml.min<sup>-1</sup>, 243 nm, t<sub>r</sub>(minor) = 8.3 min, t<sub>r</sub>(major) = 9.4 min, 94:6 e.r.

**benzyl (S)-2-methylindoline-1-carboxylate (2c):**

The title compound was prepared according to the **General procedure F** (0.2 mmol scale, 120 °C/24 h) and purified by chromatography to give a colorless oil (40.1 mg, 75% yield).

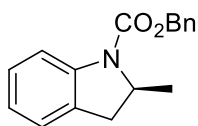

Chemical Formula: C<sub>17</sub>H<sub>17</sub>NO<sub>2</sub>  
Molecular Weight: 267,3280 g.mol<sup>-1</sup>

<sup>1</sup>H NMR (400 MHz, CDCl<sub>3</sub>): δ (ppm) 7.89 (bs, 1H), 7.51-7.31 (m, 5H), 7.24-7.13 (m, 2H), 6.98 (t, *J* = 7.4 Hz, 1H), 5.31 (s, 2H), 4.69-4.51 (m, 1H), 3.38 (dd, *J* = 15.9, 9.6 Hz, 1H), 2.65 (dd, *J* = 15.9, 2.1 Hz, 1H), 1.32 (d, *J* = 6.3 Hz, 3H)

<sup>13</sup>C NMR (101 MHz, CDCl<sub>3</sub>): δ (ppm) 153.0, 141.6, 136.5, 130.1, 128.7, 128.3, 128.2, 127.6, 125.2, 122.9, 115.6, 67.1, 55.5, 36.0, 21.4

**IR** (neat): ν (cm<sup>-1</sup>) 3033, 2958, 1701, 1484, 1403, 1282, 753

**HRMS (ESI):** Calcd for C<sub>17</sub>H<sub>17</sub>NNaO<sub>2</sub> [M+Na]<sup>+</sup>: 290.1157, found 290,1152

$[\alpha]_D^{20} = +25.7^\circ$  ( $c = 1.10$ ,  $\text{CHCl}_3$ )

**HPLC separation:** Chiralcel OJ-H; 99:1 (*n*-heptane/*i*-PrOH),  $1.0 \text{ ml}\cdot\text{min}^{-1}$ , 243 nm,  $t_r(\text{major}) = 17.9 \text{ min}$ ,  $t_r(\text{minor}) = 21.7 \text{ min}$ , 92:8 e.r.

**isobutyl (S)-2-methylindoline-1-carboxylate (2d):**

The title compound was prepared according to the **General procedure F** (0.2 mmol scale,  $120^\circ\text{C}/16 \text{ h}$ ) and purified by chromatography to give a colorless oil (41.3 mg, 89% yield).

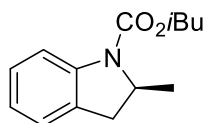

Chemical Formula:  $\text{C}_{14}\text{H}_{19}\text{NO}_2$   
Molecular Weight:  $233,3110 \text{ g}\cdot\text{mol}^{-1}$

$^1\text{H NMR}$  (400 MHz,  $\text{CDCl}_3$ ):  $\delta$  (ppm) 7.82 (bs, 1H), 7.22-7.12 (m, 2H), 6.96 (td,  $J = 7.4, 1.0 \text{ Hz}$ , 1H), 4.66-4.43 (m, 1H), 4.03 (d,  $J = 6.2 \text{ Hz}$ , 2H), 3.38 (dd,  $J = 15.9, 9.6 \text{ Hz}$ , 1H), 2.64 (dd,  $J = 15.9, 1.8 \text{ Hz}$ , 1H), 2.13-1.95 (m, 1H), 1.32 (d,  $J = 6.4 \text{ Hz}$ , 3H), 1.01 (d,  $J = 6.7 \text{ Hz}$ , 6H)

$^{13}\text{C NMR}$  (101 MHz,  $\text{CDCl}_3$ ):  $\delta$  (ppm) 153.4, 141.7, 130.1, 127.6, 125.1, 122.7, 115.5, 71.7, 55.4, 36.0, 28.1, 21.4, 19.4

**IR** (neat):  $\nu$  ( $\text{cm}^{-1}$ ) 2960, 2927, 1701, 1485, 1407, 1281, 751

**HRMS (ESI):** Calcd for  $\text{C}_{14}\text{H}_{19}\text{NNaO}_2$   $[\text{M}+\text{Na}]^+$ : 256.1313, found 256,1304

$[\alpha]_D^{20} = +32.1^\circ$  ( $c = 1.20$ ,  $\text{CHCl}_3$ )

**HPLC separation:** Chiralcel OJ-H; 99.5:0.5 (*n*-heptane/*i*-PrOH),  $0.5 \text{ ml}\cdot\text{min}^{-1}$ , 243 nm,  $t_r(\text{minor}) = 13.8 \text{ min}$ ,  $t_r(\text{major}) = 15.2 \text{ min}$ , 94.5:5.5 e.r.

**(S)-2-methyl-1-(2-methylindolin-1-yl)propan-1-one (2e):**

The title compound was prepared according to the **General procedure F** (0.2 mmol scale,  $120^\circ\text{C}/16 \text{ h}$ ) and purified by chromatography to give a colorless oil (33.3 mg, 82% yield).

Spectroscopic data are consistent with those previously reported.<sup>[10]</sup>

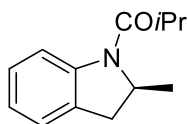

Chemical Formula:  $\text{C}_{13}\text{H}_{17}\text{NO}$   
Molecular Weight:  $203,2850 \text{ g}\cdot\text{mol}^{-1}$

$^1\text{H NMR}$  (400 MHz,  $\text{CDCl}_3$ ):  $\delta$  (ppm) 8.22 (d,  $J = 5.0 \text{ Hz}$ , 1H), 7.23-7.17 (m, 3H), 7.02 (td,  $J = 7.4, 0.9 \text{ Hz}$ , 1H), 4.63-4.41 (m, 1H), 3.47-3.32 (m, 1H), 2.91-2.76 (m, 1H), 2.67 (d,  $J = 15.3 \text{ Hz}$ , 1H), 1.35-1.15 (m, 9H)

$^{13}\text{C NMR}$  (101 MHz,  $\text{CDCl}_3$ ):  $\delta$  (ppm) 175.8, 141.9, 130.5, 127.6, 125.0, 123.8, 118.3, 55.4, 36.5, 32.9, 22.5, 20.6, 19.5

**IR** (neat):  $\nu$  (cm<sup>-1</sup>) 2966, 2929, 1651, 1479, 1404, 1270, 759

**HRMS (ESI)**: Calcd for C<sub>13</sub>H<sub>17</sub>NNaO [M+Na]<sup>+</sup>: 226.1208, found 226,1202

**[ $\alpha$ ]<sub>D</sub><sup>20</sup>** = +21.1° (c = 1.30, CHCl<sub>3</sub>); lit. +27.5 (c = 1.0, CH<sub>2</sub>Cl<sub>2</sub>).<sup>[10]</sup>

**HPLC separation**: Chiralcel OJ-H; 99:1 (*n*-heptane/*i*-PrOH), 1.0 ml.min<sup>-1</sup>, 254 nm, t<sub>r</sub>(minor) = 8.8 min, t<sub>r</sub>(major) = 12.0 min, 81.5:18.5 e.r.

### (S)-2-methyl-1-((trifluoromethyl)sulfonyl)indoline (2g):

The title compound was prepared according to the **General procedure F** (0.2 mmol scale, 100 °C/24 h) and purified by chromatography to give a colorless oil (34 mg, 64% yield). Spectroscopic data are consistent with those previously reported.<sup>[11]</sup>

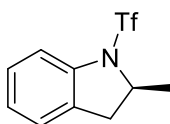

Chemical Formula: C<sub>10</sub>H<sub>10</sub>F<sub>3</sub>NO<sub>2</sub>S  
Molecular Weight: 265,2502 g.mol<sup>-1</sup>

**<sup>1</sup>H NMR** (400 MHz, CDCl<sub>3</sub>):  $\delta$  (ppm) 7.46 (d, *J* = 8.1 Hz, 1H), 7.27-7.19 (m, 2H), 7.17-7.11 (m, 1H), 4.81-4.64 (m, 1H), 3.52 (dd, *J* = 15.9, 9.2 Hz, 1H), 2.73 (dd, *J* = 15.9, 1.8 Hz, 1H), 1.44 (d, *J* = 6.5 Hz, 3H)

**<sup>13</sup>C NMR** (101 MHz, CDCl<sub>3</sub>):  $\delta$  (ppm) 138.6, 130.8, 128.2, 126.0, 125.7, 120.3 (q, *J* = 325.6 Hz), 115.8, 61.0, 36.4, 22.9

**<sup>19</sup>F NMR** (376 MHz, CDCl<sub>3</sub>):  $\delta$  (ppm) -73.97 (bs)

**IR** (neat):  $\nu$  (cm<sup>-1</sup>) 2926, 2857, 1395, 1223, 1189, 1145, 610

**HRMS (ESI)**: Calcd for C<sub>10</sub>H<sub>10</sub>F<sub>3</sub>NNaO<sub>2</sub>S [M+Na]<sup>+</sup>: 288.0282, found 288,0277

**[ $\alpha$ ]<sub>D</sub><sup>20</sup>** = +16.1° (c = 1.35, CHCl<sub>3</sub>); lit. +25.3 (c = 1.0, CHCl<sub>3</sub>).<sup>[11]</sup>

**HPLC separation**: Chiralcel OJ-H; 99.5:0.5 (*n*-heptane/*i*-PrOH), 0.5 ml.min<sup>-1</sup>, 229 nm, t<sub>r</sub>(major) = 11.4 min, t<sub>r</sub>(minor) = 12.0 min, 74:26 e.r.

### methyl (S)-5-fluoro-2-methylindoline-1-carboxylate (2h):

The title compound was prepared according to the **General procedure F** (0.2 mmol scale, 120 °C/18 h) and purified by chromatography to give a colorless oil (35.3 mg, 84% yield).

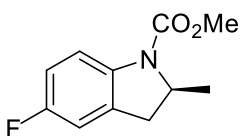

Chemical Formula: C<sub>11</sub>H<sub>12</sub>FNO<sub>2</sub>  
Molecular Weight: 209,2204 g.mol<sup>-1</sup>

**<sup>1</sup>H NMR** (400 MHz, CDCl<sub>3</sub>):  $\delta$  (ppm) 7.75 (bs, 1H), 6.90-6.81 (m, 2H), 4.62-4.48 (s, 1H), 3.83 (s, 3H), 3.35 (ddd, *J* = 16.2, 9.6, 1.1 Hz, 1H), 2.60 (dd, *J* = 16.2, 1.8 Hz, 1H), 1.29 (d, *J* = 6.4 Hz, 3H)

<sup>13</sup>C NMR (101 MHz, CDCl<sub>3</sub>): δ (ppm) 159.1 (d, *J* = 240.5 Hz), 153.6, 137.4, 132.0, 116.1 (d, *J* = 8.2 Hz), 113.8 (d, *J* = 22.9 Hz), 112.4 (d, *J* = 24.0 Hz), 55.8, 52.6, 36.0, 21.3

<sup>19</sup>F NMR (376 MHz, CDCl<sub>3</sub>): δ (ppm) -121.21 (s)

IR (neat): ν (cm<sup>-1</sup>) 2955, 2855, 1702, 1486, 1389

HRMS (ESI): Calcd for C<sub>11</sub>H<sub>12</sub>FNNaO<sub>2</sub> [M+Na]<sup>+</sup>: 232.0750, found 232,0741

[α]<sub>D</sub><sup>20</sup> = +47.3° (c = 1.50, CHCl<sub>3</sub>)

HPLC separation: Chiralcel OJ-H; 99:1 (*n*-heptane/*i*-PrOH), 1.0 ml.min<sup>-1</sup>, 240 nm, t<sub>r</sub>(major) = 11.0 min, t<sub>r</sub>(minor) = 12.4 min, 97.5:2.5 e.r.

#### methyl (S)-5-chloro-2-methylindoline-1-carboxylate (2i):

The title compound was prepared according to the **General procedure F** (0.2 mmol scale, 120 °C/32 h) and purified by chromatography to give a colorless oil (22.3 mg, 49% yield).

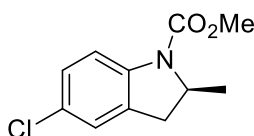

Chemical Formula: C<sub>11</sub>H<sub>12</sub>ClNO<sub>2</sub>  
Molecular Weight: 225,6720 g.mol<sup>-1</sup>

<sup>1</sup>H NMR (400 MHz, CDCl<sub>3</sub>): δ (ppm) 7.73 (bs, 1H), 7.16-7.09 (m, 2H), 4.65-4.47 (m, 1H), 3.84 (s, 3H), 3.34 (dd, *J* = 16.2, 9.6 Hz, 1H), 2.61 (dd, *J* = 16.2, 2.0 Hz, 1H), 1.28 (d, *J* = 6.3 Hz, 3H)

<sup>13</sup>C NMR (101 MHz, CDCl<sub>3</sub>): δ (ppm) 153.6, 140.3, 132.1, 127.7, 127.5, 125.3, 116.3, 55.8, 52.7, 35.8, 21.2

IR (neat): ν (cm<sup>-1</sup>) 2955, 2927, 1704, 1480, 1383, 763

HRMS (ESI): Calcd for C<sub>11</sub>H<sub>14</sub>ClNNO<sub>2</sub> [M+Na]<sup>+</sup>: 248.0454, found 248,0447

[α]<sub>D</sub><sup>20</sup> = +39.4° (c = 0.95, CHCl<sub>3</sub>)

HPLC separation: Chiralpak IA; 99:1 (*n*-heptane/*i*-PrOH), 1.0 ml.min<sup>-1</sup>, 249 nm, t<sub>r</sub>(minor) = 11.0 min, t<sub>r</sub>(major) = 13.4 min, 92:8 e.r.

#### methyl (S)-2,5-dimethylindoline-1-carboxylate (2j):

The title compound was prepared according to the **General procedure F** (0.2 mmol scale, 120 °C/32 h) and purified by chromatography to give a colorless oil (21.1 mg, 51% yield).

<sup>1</sup>H NMR (400 MHz, CDCl<sub>3</sub>): δ (ppm) 7.70 (bs, 1H), 7.02-

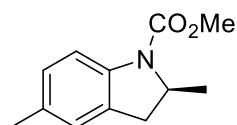

Chemical Formula: C<sub>12</sub>H<sub>15</sub>NO<sub>2</sub>  
Molecular Weight: 205,2570 g.mol<sup>-1</sup>

6.92 (m,  $J = 9.5$  Hz, 2H), 4.59-4.46 (m, 1H), 3.83 (s, 3H), 3.33 (dd,  $J = 15.9, 9.5$  Hz, 1H), 2.59 (dd,  $J = 15.9, 1.8$  Hz, 1H), 2.30 (s, 3H), 1.28 (d,  $J = 6.3$  Hz, 3H)

$^{13}\text{C}$  NMR (101 MHz,  $\text{CDCl}_3$ ):  $\delta$  (ppm) 153.8, 139.3, 132.4, 130.1, 128.0, 125.9, 115.2, 55.5, 52.5, 36.0, 29.8, 21.0

IR (neat):  $\nu$  ( $\text{cm}^{-1}$ ) 2921, 2853, 1705, 1493, 1386, 1282, 762

HRMS (ESI): Calcd for  $\text{C}_{12}\text{H}_{15}\text{NNaO}_2$  [ $\text{M}+\text{Na}$ ] $^+$ : 228.0995, found 228,0991

$[\alpha]_{\text{D}}^{20} = +25.8^\circ$  ( $c = 1.10$ ,  $\text{CHCl}_3$ )

HPLC separation: Chiralpak IA; 99:1 (*n*-heptane/*i*-PrOH), 1.0  $\text{ml}\cdot\text{min}^{-1}$ , 245 nm,  $t_{\text{r}}$ (minor) = 14.8 min,  $t_{\text{r}}$ (major) = 19.1 min, 91:9 e.r.

### dimethyl (S)-2-methylindoline-1,5-dicarboxylate (2k):

The title compound was prepared according to the **General procedure F** (0.2 mmol scale, 120 °C/36 h) and purified by chromatography to give a slight viscous yellow oil (40.1 mg, 80% yield).

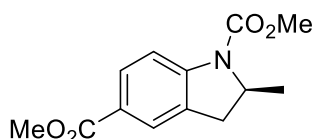

Chemical Formula:  $\text{C}_{13}\text{H}_{15}\text{NO}_4$   
Molecular Weight: 249,2660  $\text{g}\cdot\text{mol}^{-1}$

$^1\text{H}$  NMR (400 MHz,  $\text{CDCl}_3$ ):  $\delta$  (ppm) 7.89 (d,  $J = 8.1$  Hz, 1H), 7.81 (s, 1H), 7.76 (bs, 1H), 4.68-4.46 (m, 1H), 3.87 (s, 3H), 3.85 (s, 3H), 3.36 (ddd,  $J = 16.1, 9.6, 0.5$  Hz, 1H), 2.66 (dd,  $J = 16.1, 1.7$  Hz, 1H), 1.29 (d,  $J = 6.4$  Hz, 3H)

$^{13}\text{C}$  NMR (101 MHz,  $\text{CDCl}_3$ ):  $\delta$  (ppm) 167.0, 153.6, 145.6, 130.3, 126.6, 124.6, 114.7, 56.2, 52.8, 52.0, 35.5, 21.3

IR (neat):  $\nu$  ( $\text{cm}^{-1}$ ) 2953, 2854, 1707, 1384, 1267, 769

HRMS (ESI): Calcd for  $\text{C}_{13}\text{H}_{15}\text{NNaO}_4$  [ $\text{M}+\text{Na}$ ] $^+$ : 272.0893, found 272,0894

$[\alpha]_{\text{D}}^{20} = +48.7^\circ$  ( $c = 1.00$ ,  $\text{CHCl}_3$ )

HPLC separation: Chiralpak IA; 99:1 (*n*-heptane/*i*-PrOH), 1.0  $\text{ml}\cdot\text{min}^{-1}$ , 275 nm,  $t_{\text{r}}$ (minor) = 31.2 min,  $t_{\text{r}}$ (major) = 45.6 min, 94:6 e.r.

### methyl (S)-5-cyano-2-methylindoline-1-carboxylate (2l):

The title compound was prepared according to the **General procedure F** (0.2 mmol scale, 140 °C/48 h) and purified by chromatography to give a white solid (26 mg, 60% yield).

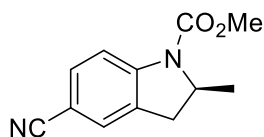

Chemical Formula:  $\text{C}_{12}\text{H}_{12}\text{N}_2\text{O}_2$   
Molecular Weight: 216,2400  $\text{g}\cdot\text{mol}^{-1}$

$^1\text{H}$  NMR (400 MHz,  $\text{CDCl}_3$ ):  $\delta$  (ppm) 7.82 (bs, 1H), 7.49 (d,  $J = 8.4$  Hz, 1H), 7.41 (s, 1H), 4.69-4.44 (m, 1H), 3.87 (s,

3H), 3.37 (dd,  $J = 16.3, 9.7$  Hz, 1H), 2.68 (dd,  $J = 16.3, 2.0$  Hz, 1H), 1.31 (d,  $J = 6.4$  Hz, 3H)

$^{13}\text{C}$  NMR (101 MHz,  $\text{CDCl}_3$ ):  $\delta$  (ppm) 153.4, 132.9, 131.3, 128.7, 119.6, 115.7, 105.7, 56.2, 53.1, 35.5, 21.3

IR (neat):  $\nu$  ( $\text{cm}^{-1}$ ) 2923, 2852, 2221, 1710, 1383, 1277, 758

HRMS (ESI): Calcd for  $\text{C}_{12}\text{H}_{12}\text{N}_2\text{NaO}_2$  [ $\text{M}+\text{Na}$ ] $^+$ : 239.0791, found 239,0789

Mp: 88-90 °C

$[\alpha]_{\text{D}}^{20} = +58.6^\circ$  ( $c = 1.12$ ,  $\text{CHCl}_3$ )

HPLC separation: Chiralpak IA; 99:1 (*n*-heptane/*i*-PrOH), 1.0 ml.min $^{-1}$ , 269 nm,  $t_{\text{r}}$ (minor) = 25.4 min,  $t_{\text{r}}$ (major) = 30.2 min, 97:3 e.r.

#### methyl (S)-6-fluoro-2-methylindoline-1-carboxylate (2m):

The title compound was prepared according to the **General procedure F** (0.2 mmol scale, 120 °C/18 h) and purified by chromatography to give a colorless oil (40.2 mg, 96% yield).

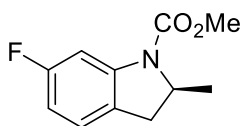

Chemical Formula:  $\text{C}_{11}\text{H}_{12}\text{FNO}_2$   
Molecular Weight: 209,2204 g.mol $^{-1}$

$^1\text{H}$  NMR (400 MHz,  $\text{CDCl}_3$ ):  $\delta$  (ppm) 7.53 (bs, 1H), 7.07-7.02 (m, 1H), 6.64 (tdd,  $J = 9.0, 8.2, 1.7$  Hz, 1H), 4.64-4.50 (m, 1H), 3.84 (s, 3H), 3.30 (dd,  $J = 15.7, 9.6$  Hz, 1H), 2.59 (d,  $J = 15.7$  Hz, 1H), 1.29 (d,  $J = 6.3$  Hz, 3H)

$^{13}\text{C}$  NMR (101 MHz,  $\text{CDCl}_3$ ):  $\delta$  (ppm) 162.7 (d,  $J = 241.4$  Hz), 153.4, 142.7, 125.4 (d,  $J = 9.5$  Hz), 109.0 (d,  $J = 22.8$  Hz), 103.6 (d,  $J = 28.9$  Hz), 56.4, 52.6, 35.2, 21.1

$^{19}\text{F}$  NMR (376 MHz,  $\text{CDCl}_3$ ):  $\delta$  (ppm)  $\delta$  -112.64 (s)

IR (neat):  $\nu$  ( $\text{cm}^{-1}$ ) 2954, 2860, 1707, 1494, 1444, 1388, 1295

HRMS (ESI): Calcd for  $\text{C}_{11}\text{H}_{12}\text{FNNaO}_2$  [ $\text{M}+\text{Na}$ ] $^+$ : 232.0744, found 232,0743

$[\alpha]_{\text{D}}^{20} = +31.1^\circ$  ( $c = 1.17$ ,  $\text{CHCl}_3$ )

HPLC separation: Chiralcel OD-H; 99:1 (*n*-heptane/*i*-PrOH), 1.0 ml.min $^{-1}$ , 241 nm,  $t_{\text{r}}$ (major) = 6.20 min,  $t_{\text{r}}$ (minor) = 6.80 min, 98:2 e.r.

#### methyl (S)-2-methyl-6-(trifluoromethyl)indoline-1-carboxylate (2n):

The title compound was prepared according to the **General procedure F** (0.2 mmol scale, 120 °C/18 h) and purified by chromatography to give a white solid (47.6 mg, 92% yield).

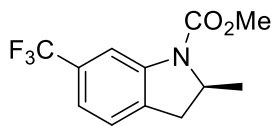

Chemical Formula: C<sub>12</sub>H<sub>12</sub>F<sub>3</sub>NO<sub>2</sub>  
Molecular Weight: 259,2282 g.mol<sup>-1</sup>

<sup>1</sup>H NMR (400 MHz, CDCl<sub>3</sub>): δ (ppm) 8.09 (bs, 1H), 7.23 (bs, 2H), 4.68-4.52 (m, 1H), 3.87 (s, 3H), 3.40 (dd, *J* = 16.7, 9.7 Hz, 1H), 2.69 (d, *J* = 16.7 Hz, 1H), 1.31 (d, *J* = 6.4 Hz, 3H)

<sup>13</sup>C NMR (101 MHz, CDCl<sub>3</sub>): δ (ppm) 153.6, 130.2 (q, *J* = 31.3 Hz), 125.3, 124.4 (q, *J* = 272.2 Hz), 119.9 (q, *J* = 4.0 Hz), 112.4 (q, *J* = 4.0 Hz), 55.9, 52.9, 35.9, 21.2

<sup>19</sup>F NMR (376 MHz, CDCl<sub>3</sub>): δ (ppm) -62.17 (s)

IR (neat): ν (cm<sup>-1</sup>) 2959, 2922, 1706, 1290, 819

HRMS (ESI): Calcd for C<sub>12</sub>H<sub>12</sub>F<sub>3</sub>NNaO<sub>2</sub> [M+Na]<sup>+</sup>: 282.0712, found 282,0711

Mp: 62-64 °C

[α]<sub>D</sub><sup>20</sup> = + 32.5° (c = 1.38, CHCl<sub>3</sub>)

HPLC separation: Chiralcel OD-H; 99:1 (*n*-heptane/*i*-PrOH), 1.0 ml.min<sup>-1</sup>, 246 nm, t<sub>r</sub>(major) = 5.5 min, t<sub>r</sub>(minor) = 6.0 min, 97.5:2.5 e.r.

#### methyl (S)-6-(dimethylamino)-2-methylindoline-1-carboxylate (2o):

The title compound was prepared according to the **General procedure F** (0.2 mmol scale, 120 °C/18 h) and purified by chromatography to give a colorless oil (35.3 mg, 75% yield).

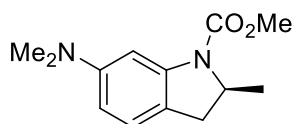

Chemical Formula: C<sub>13</sub>H<sub>18</sub>N<sub>2</sub>O<sub>2</sub>  
Molecular Weight: 234,2990 g.mol<sup>-1</sup>

<sup>1</sup>H NMR (400 MHz, CDCl<sub>3</sub>): δ (ppm) 7.40 (bs, 1H), 7.00 (d, *J* = 8.2 Hz, 1H), 6.38 (dd, *J* = 8.2, 2.4 Hz, 1H), 4.61-4.44 (m, 1H), 3.83 (s, 3H), 3.27 (ddd, *J* = 15.2, 9.4, 0.8 Hz, 1H), 2.94 (s, 6H), 2.53 (dd, *J* = 15.2, 1.9 Hz, 1H), 1.28 (d, *J* = 6.3 Hz, 3H)

<sup>13</sup>C NMR (101 MHz, CDCl<sub>3</sub>): δ (ppm) 153.8, 151.0, 125.2, 107.6, 100.9, 56.2, 52.4, 41.3, 35.2, 21.4

IR (neat): ν (cm<sup>-1</sup>) 2854, 2796, 1704, 1508, 1387, 1055, 763

HRMS (ESI): Calcd for C<sub>13</sub>H<sub>18</sub>N<sub>2</sub>NaO<sub>2</sub> [M+H]<sup>+</sup>: 235.1441, found 235.1440

[α]<sub>D</sub><sup>20</sup> = - 2.9° (c = 1.31, CHCl<sub>3</sub>)

HPLC separation: Chiralcel OJ-H; 99:1 (*n*-heptane/*i*-PrOH), 1.0 ml.min<sup>-1</sup>, 312 nm, t<sub>r</sub>(minor) = 15.2 min, t<sub>r</sub>(major) = 19.1 min, 94.5:5.5 e.r.

#### methyl (S)-2,6-dimethylindoline-1-carboxylate (2p):

The title compound was prepared according to the **General procedure F** (0.2 mmol scale, 120 °C/20 h) and purified by chromatography to give a white solid (38.7 mg, 94% yield).

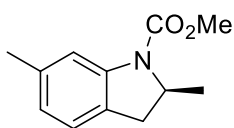

Chemical Formula: C<sub>12</sub>H<sub>15</sub>NO<sub>2</sub>  
Molecular Weight: 205,2570 g.mol<sup>-1</sup>

<sup>1</sup>H NMR (400 MHz, CDCl<sub>3</sub>): δ (ppm) 7.68 (bs, 1H), 7.03 (d, *J* = 7.5 Hz, 2H), 6.79 (dd, *J* = 7.5, 0.6 Hz, 2H), 4.60-4.48 (m, 1H), 3.84 (s, 3H), 3.31 (dd, *J* = 15.7, 9.5 Hz, 1H), 2.58 (dd, *J* = 15.8, 1.2 Hz, 1H), 2.34 (s, 3H), 1.28 (d, *J* = 6.3 Hz, 3H)

<sup>13</sup>C NMR (101 MHz, CDCl<sub>3</sub>): δ (ppm) 153.8, 141.6, 137.5, 127.2, 124.8, 123.5, 116.2, 55.8, 52.5, 35.7, 21.8, 21.3

IR (neat): ν (cm<sup>-1</sup>) 2925, 2855, 1698, 1373, 1277, 1134, 803, 759

HRMS (ESI): Calcd for C<sub>12</sub>H<sub>15</sub>NNaO<sub>2</sub> [M+Na]<sup>+</sup>: 228.0995, found 228,0993

Mp: 84-86 °C

[α]<sub>D</sub><sup>20</sup> = +33.8° (c = 1.16, CHCl<sub>3</sub>)

HPLC separation: Chiralpak IA; 99:1 (*n*-heptane/*i*-PrOH), 1.0 ml.min<sup>-1</sup>, 224 nm, t<sub>r</sub>(minor) = 8.3 min, t<sub>r</sub>(major) = 10.3 min, 96:4 e.r.

#### methyl (S)-6-methoxy-2-methylindoline-1-carboxylate (2q):

The title compound was prepared according to the **General procedure F** (0.2 mmol scale, 120 °C/20 h) and purified by chromatography to give a colorless oil (36.7 mg, 83% yield).

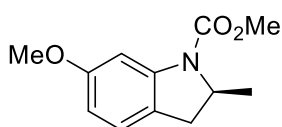

Chemical Formula: C<sub>12</sub>H<sub>15</sub>NO<sub>3</sub>  
Molecular Weight: 221,2560 g.mol<sup>-1</sup>

<sup>1</sup>H NMR (400 MHz, CDCl<sub>3</sub>): δ (ppm) 7.50 (bs, 1H), 7.02 (d, *J* = 8.2 Hz, 1H), 6.52 (dd, *J* = 8.2, 2.4 Hz, 1H), 4.46-4.62 (m, 1H), 3.84 (s, 3H), 3.80 (s, 3H), 3.28 (ddd, *J* = 15.5, 9.5, 1.1 Hz, 1H), 2.55 (dd, *J* = 15.5, 2.1 Hz, 1H), 1.28 (d, *J* = 6.3 Hz, 3H)

<sup>13</sup>C NMR (101 MHz, CDCl<sub>3</sub>): δ (ppm) 159.7, 153.7, 142.6, 125.3, 121.8, 109.0, 101.4, 56.4, 55.6, 52.6, 35.3, 21.3

IR (neat): ν (cm<sup>-1</sup>) 2953, 2857, 1704, 1386, 1296, 764

HRMS (ESI): Calcd for C<sub>12</sub>H<sub>15</sub>NNaO<sub>3</sub> [M+Na]<sup>+</sup>: 244.0944, found 244,0945

[α]<sub>D</sub><sup>20</sup> = +22.5° (c = 1.30, CHCl<sub>3</sub>)

HPLC separation: Chiralpak IA; 99:1 (*n*-heptane/*i*-PrOH), 1.0 ml.min<sup>-1</sup>, 244 nm, t<sub>r</sub>(minor) = 11.6 min, t<sub>r</sub>(major) = 13.0 min, 96:4 e.r.



### methyl (S)-7-fluoro-2-methylindoline-1-carboxylate (2r):

The title compound was prepared according to the **General procedure F** (0.2 mmol scale, 120 °C/18 h) and purified by chromatography to give a slight yellow oil (33.1 mg, 79% yield).

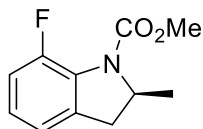

Chemical Formula: C<sub>11</sub>H<sub>12</sub>FNO<sub>2</sub>  
Molecular Weight: 209,2204 g.mol<sup>-1</sup>

<sup>1</sup>H NMR (400 MHz, CDCl<sub>3</sub>): δ (ppm) 7.02-6.90 (m, 3H), 4.67 (dq, *J* = 8.5, 6.6, 1.4 Hz, 1H), 3.82 (s, 3H), 3.42 (dd, *J* = 15.8, 8.5 Hz, 1H), 2.52 (d, *J* = 15.8 Hz, 1H), 1.26 (d, *J* = 6.6 Hz, 3H)

<sup>13</sup>C NMR (101 MHz, CDCl<sub>3</sub>): δ (ppm) 154.1, 151.9 (d, *J* = 252.1 Hz), 135.6 (d, *J* = 2.8 Hz), 127.9 (d, *J* = 9.9 Hz), 125.1 (d, *J* = 7.0 Hz), 120.8 (d, *J* = 3.3 Hz), 116.0 (d, *J* = 21.2 Hz), 57.9, 53.1, 36.7 (d, *J* = 1.7 Hz), 21.2

<sup>19</sup>F NMR (376 MHz, CDCl<sub>3</sub>): δ (ppm) -117.60 to -117.71 (m)

IR (neat): ν (cm<sup>-1</sup>) 2955, 2926, 1704, 1484, 1381, 762

HRMS (ESI): Calcd for C<sub>11</sub>H<sub>12</sub>FNNaO<sub>2</sub> [M+Na]<sup>+</sup>: 232.0744, found 232,0744

[α]<sub>D</sub><sup>20</sup> = +64.5° (c = 1.14, CHCl<sub>3</sub>)

HPLC separation: Chiralcel OJ-H; 99:1 (*n*-heptane/*i*-PrOH), 1.0 ml.min<sup>-1</sup>, 242 nm, t<sub>r</sub>(minor) = 14.6 min, t<sub>r</sub>(major) = 15.5 min, 95.5:4.5 e.r.

### methyl (S)-2,5,7-trimethylindoline-1-carboxylate (2s):

The title compound was prepared according to the **General procedure F** (0.2 mmol scale, 120 °C/18 h) and purified by chromatography to give a slight yellow oil (41.1 mg, 94% yield).

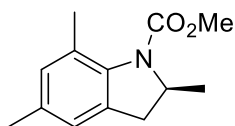

Chemical Formula: C<sub>13</sub>H<sub>17</sub>NO<sub>2</sub>  
Molecular Weight: 219,2840 g.mol<sup>-1</sup>

<sup>1</sup>H NMR (400 MHz, CDCl<sub>3</sub>): δ (ppm) 6.85 (s, 2H), 4.70 (dq, *J* = 7.6, 6.6, 0.9 Hz, 1H), 3.78 (s, 3H), 3.35 (dd, *J* = 15.5, 8.4 Hz, 1H), 2.38 (d, *J* = 15.5 Hz, 1H), 2.28 (s, 3H), 2.25 (s, 3H), 1.21 (d, *J* = 6.6 Hz, 3H)

<sup>13</sup>C NMR (101 MHz, CDCl<sub>3</sub>): δ (ppm) 155.0, 137.6, 134.2, 133.2, 130.6, 127.9, 123.2, 58.1, 52.6, 36.7, 21.2, 21.0, 20.1

IR (neat): ν (cm<sup>-1</sup>) 2953, 2922, 1710, 1439, 1366, 1262

HRMS (ESI): Calcd for C<sub>13</sub>H<sub>17</sub>NNaO<sub>2</sub> [M+Na]<sup>+</sup>: 242,1151, found 242,1155

[α]<sub>D</sub><sup>20</sup> = +12.0° (c = 1.18, CHCl<sub>3</sub>)

**HPLC separation:** Chiralcel OJ-H; 99:1 (*n*-heptane/*i*-PrOH), 1.0 ml.min<sup>-1</sup>, 243 nm, t<sub>r</sub>(minor) = 11.3 min, t<sub>r</sub>(major) = 17.1 min, 84:16 e.r.

**methyl (S)-2-methyl-2,3-dihydro-1H-pyrrolo[2,3-b]pyridine-1-carboxylate (2t):**

The title compound was prepared according to the **General procedure F** (0.2 mmol scale, 120 °C/24 h) and purified by chromatography to give a slight yellow oil (25.8 mg, 67% yield).

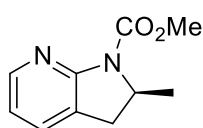

Chemical Formula: C<sub>10</sub>H<sub>12</sub>N<sub>2</sub>O<sub>2</sub>  
Molecular Weight: 192,2180 g.mol<sup>-1</sup>

<sup>1</sup>H NMR (400 MHz, CDCl<sub>3</sub>): δ (ppm) 8.11 (dd, *J* = 5.0, 1.4 Hz, 1H), 7.98 (bs, 1H), 7.06 (dd, *J* = 7.9, 5.0 Hz, 1H), 4.64-4.47 (m, 1H), 3.85 (s, 3H), 3.48 (ddd, *J* = 17.0, 9.8, 0.8 Hz, 1H), 2.77 (dd, *J* = 17.0, 2.7 Hz, 1H), 1.34 (d, *J* = 6.4 Hz, 3H)

<sup>13</sup>C NMR (101 MHz, CDCl<sub>3</sub>): δ (ppm) 153.9, 152.6, 143.6, 136.3, 122.1, 121.7, 54.1, 52.8, 38.2, 21.6

**IR** (neat): ν (cm<sup>-1</sup>) 2957, 2928, 1706, 1445, 1293, 764

**HRMS (ESI):** Calcd for C<sub>10</sub>H<sub>13</sub>N<sub>2</sub>O<sub>2</sub> [M+H]<sup>+</sup>: 193.0977, found 193.0972

[α]<sub>D</sub><sup>20</sup> = +9.9° (c = 0.80, CHCl<sub>3</sub>)

**HPLC separation:** Chiralcel OJ-H; 99:1 (*n*-heptane/*i*-PrOH), 1.0 ml.min<sup>-1</sup>, 242 nm, t<sub>r</sub>(major) = 20.0 min, t<sub>r</sub>(minor) = 22.5 min, 94:6 e.r.

### dimethyl (S)-2-methylindoline-1,2-dicarboxylate (2u):

The title compound was prepared according to the **General procedure F** (0.2 mmol scale, 120 °C/20 h) and purified by chromatography to give a colorless oil (41.5 mg, 83% yield).

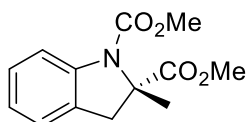

Chemical Formula: C<sub>13</sub>H<sub>15</sub>NO<sub>4</sub>  
Molecular Weight: 249,2660 g.mol<sup>-1</sup>

Mixture of two rotameres, description of the major:

<sup>1</sup>H NMR (400 MHz, CDCl<sub>3</sub>): δ (ppm) 7.93 (bs, 1H), 7.17-7.27 (m, 1H), 7.18-7.08 (m, 2H), 6.99 (t, *J* = 7.4 Hz, 1H), 3.99-3.67 (m, 6H), 3.46 (d, *J* = 16.1 Hz, 1H), 3.04 (d, *J* = 16.1 Hz, 1H), 1.69 (d, *J* = 1.8 Hz, 3H)

<sup>13</sup>C NMR (101 MHz, CDCl<sub>3</sub>): δ (ppm) 173.8, 152.9, 142.1, 128.1, 123.2, 115.2, 67.7, 52.7, 42.9, 23.7

IR (neat): ν (cm<sup>-1</sup>) 2952, 2855, 1745, 1703, 1486, 1370, 764

HRMS (ESI): Calcd for C<sub>13</sub>H<sub>15</sub>NNaO<sub>4</sub> [M+Na]<sup>+</sup>: 272.0893, found 272,0891

[α]<sub>D</sub><sup>20</sup> = -10.0° (c = 0.90, CHCl<sub>3</sub>)

HPLC separation: Chiralpak IA; 99:1 (*n*-heptane/*i*-PrOH), 1.0 ml.min<sup>-1</sup>, 241 nm, t<sub>r</sub>(major) = 22.4 min, t<sub>r</sub>(minor) = 26.9 min, 92:8 e.r.

### 2-ethyl 1-methyl (S)-2-methylindoline-1,2-dicarboxylate (2v):

The title compound was prepared according to the **General procedure F** (0.2 mmol scale, 120 °C/24 h) and purified by chromatography to give a colorless oil (37.6 mg, 71% yield).

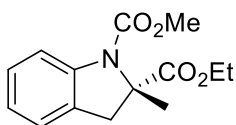

Chemical Formula: C<sub>14</sub>H<sub>17</sub>NO<sub>4</sub>  
Molecular Weight: 263,2930 g.mol<sup>-1</sup>

Mixture of two rotameres, description of the major:

<sup>1</sup>H NMR (400 MHz, CDCl<sub>3</sub>): δ (ppm) 7.93 (bs, 1H), 7.28-7.17 (m, 1H), 7.12 (d, *J* = 7.3 Hz, 1H), 7.00 (t, *J* = 7.3 Hz, 1H), 4.34-4.09 (m, 2H), 3.77 (s, 3H), 3.45 (d, *J* = 16.1 Hz, 1H), 3.03 (d, *J* = 16.1 Hz, 1H), 1.68 (s, 3H), 1.24 (t, *J* = 7.1 Hz, 7H)

<sup>13</sup>C NMR (101 MHz, CDCl<sub>3</sub>): δ (ppm) 173.3, 142.3, 128.1, 127.3, 124.6, 123.2, 115.3, 67.8, 61.6, 52.5, 43.0, 23.5, 14.3

IR (neat): ν (cm<sup>-1</sup>) 2982, 2855, 1738, 1704, 1371, 1240, 754

HRMS (ESI): Calcd for C<sub>14</sub>H<sub>17</sub>NNaO<sub>4</sub> [M+Na]<sup>+</sup>: 286.1050, found 286,1051

[α]<sub>D</sub><sup>20</sup> = -13.7° (c = 1.15, CHCl<sub>3</sub>)

**HPLC separation:** Chiralcel OJ-H; 99:1 (*n*-heptane/*i*-PrOH), 1.0 ml.min<sup>-1</sup>, 241 nm, t<sub>r</sub>(major) = 23.9 min, t<sub>r</sub>(minor) = 27.4 min, 85:15 e.r.

**1-benzyl 2-methyl (S)-2-methylindoline-1,2-dicarboxylate (2w):**

The title compound was prepared according to the **General procedure F** (0.2 mmol scale, 120 °C/17 h) and purified by chromatography to give a colorless oil (30 mg, 46% yield).

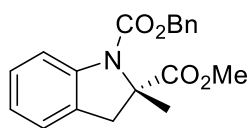

Chemical Formula: C<sub>19</sub>H<sub>19</sub>NO<sub>4</sub>  
Molecular Weight: 325,3640 g.mol<sup>-1</sup>

Mixture of two rotameres, description of the major:

<sup>1</sup>H NMR (400 MHz, CDCl<sub>3</sub>): δ (ppm) 7.98 (d, *J* = 6.6 Hz, 1H), 7.47-6.95 (m, 8H), 5.40-5.30 (m, *J* = 11.1 Hz, 2H), 3.46 (d, *J* = 16.2 Hz, 1H), 3.42 (s, 3H), 3.04 (d, *J* = 16.2 Hz, 1H), 1.70 (s, 3H)

<sup>13</sup>C NMR (101 MHz, CDCl<sub>3</sub>): δ (ppm) 173.6, 152.2, 142.2, 140.9, 135.8, 128.7, 128.4, 128.1, 127.1, 124.5, 123.3, 115.4, 67.7, 67.4, 52.5, 43.0, 23.7

**IR** (neat): ν (cm<sup>-1</sup>) 3033, 2949, 1744, 1703, 1397, 753

**HRMS (ESI):** Calcd for C<sub>19</sub>H<sub>19</sub>NNaO<sub>4</sub> [M+Na]<sup>+</sup>: 348.1206, found 348,1208

[α]<sub>D</sub><sup>20</sup> = -22.6° (c = 1.36, CHCl<sub>3</sub>)

**HPLC separation:** Chiralpak IA; 97:3 (*n*-heptane/*i*-PrOH), 1.0 ml.min<sup>-1</sup>, 242 nm, t<sub>r</sub>(major) = 18.9 min, t<sub>r</sub>(minor) = 31.7 min, 80:20 e.r.

**dimethyl (S)-2,6-dimethylindoline-1,2-dicarboxylate (2x):**

The title compound was prepared according to the **General procedure F** (0.2 mmol scale, 120 °C/20 h) and purified by chromatography to give a pale viscous oil (26.5 mg, 50% yield).

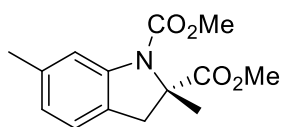

Chemical Formula: C<sub>14</sub>H<sub>17</sub>NO<sub>4</sub>  
Molecular Weight: 263,2930 g.mol<sup>-1</sup>

Mixture of two rotameres, description of the major:

<sup>1</sup>H NMR (400 MHz, CDCl<sub>3</sub>): δ (ppm) 7.78 (bs, 1H), 6.99 (d, *J* = 7.5 Hz, 1H), 6.81 (d, *J* = 7.5 Hz, 1H), 3.93-3.68 (m, 6H), 3.41 (d, *J* = 15.9 Hz, 1H), 2.99 (d, *J* = 15.9 Hz, 1H), 2.35 (s, 3H), 1.68 (s, 3H)

<sup>13</sup>C NMR (101 MHz, CDCl<sub>3</sub>): δ (ppm) 173.9, 153.0, 142.3, 138.2, 124.6, 124.2, 123.9, 116.0, 68.0, 52.7, 42.6, 23.6, 21.8

**IR** (neat): ν (cm<sup>-1</sup>) 2954, 2860, 1745, 1701, 1369, 1070, 752

**HRMS (ESI):** Calcd for C<sub>14</sub>H<sub>17</sub>NNaO<sub>4</sub> [M+Na]<sup>+</sup>: 286.1050, found 286,1049

[ $\alpha$ ]<sub>D</sub><sup>20</sup> = -10.0° (c = 1.00, CHCl<sub>3</sub>)

**HPLC separation:** Chiralpak IA; 99:1 (*n*-heptane/*i*-PrOH), 1.0 ml.min<sup>-1</sup>, 243 nm, t<sub>r</sub>(major) = 15.3 min, t<sub>r</sub>(minor) = 16.3 min, 94:6 e.r.

#### dimethyl (S)-5-fluoro-2-methylindoline-1,2-dicarboxylate (2y):

The title compound was prepared according to the **General procedure F** (0.2 mmol scale, 120 °C/17 h) and purified by chromatography to give a colorless oil (41.2 mg, 77% yield).

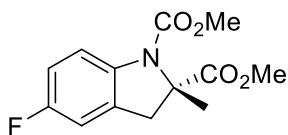

Chemical Formula: C<sub>13</sub>H<sub>14</sub>FNO<sub>4</sub>  
Molecular Weight: 267,2564 g.mol<sup>-1</sup>

Mixture of two rotameres, description of the major:

<sup>1</sup>H NMR (400 MHz, CDCl<sub>3</sub>):  $\delta$  (ppm) 7.86 (bs, 1H), 6.99-6.76 (m, 2H), 3.90-3.67 (m, 6H), 3.43 (d, *J* = 16.4 Hz, 1H), 3.01 (d, *J* = 16.4 Hz, 1H), 1.68 (s, 3H)

<sup>13</sup>C NMR (101 MHz, CDCl<sub>3</sub>):  $\delta$  (ppm) 173.5, 159.2 (d, *J* = 241.1 Hz), 153.0, 138.3, 128.8, 115.9, 114.4 (d, *J* = 22.5 Hz), 112.0, 68.1, 52.8, 42.7, 23.7

<sup>19</sup>F NMR (376 MHz, CDCl<sub>3</sub>):  $\delta$  (ppm) -120.55 (s)

IR (neat):  $\nu$  (cm<sup>-1</sup>) 2954, 2854, 1745, 1707, 1487, 1372, 1257, 764

**HRMS (ESI):** Calcd for C<sub>13</sub>H<sub>14</sub>FNNaO<sub>4</sub> [M+Na]<sup>+</sup>: 290.0799, found 290,0800

[ $\alpha$ ]<sub>D</sub><sup>20</sup> = -5.9° (c = 1.00, CHCl<sub>3</sub>)

**HPLC separation:** Chiralpak IA; 99:1 (*n*-heptane/*i*-PrOH), 1.0 ml.min<sup>-1</sup>, 238 nm, t<sub>r</sub>(major) = 22.5 min, t<sub>r</sub>(minor) = 25.3 min, 93.5:6.5 e.r.

#### dimethyl (S)-2,5-dimethylindoline-1,2-dicarboxylate (2z):

The title compound was prepared according to the **General procedure F** (0.2 mmol scale, 120 °C/22 h) and purified by chromatography to give a pale viscous oil (31.1 mg, 59% yield).

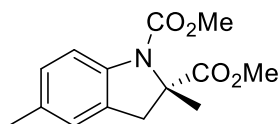

Chemical Formula: C<sub>14</sub>H<sub>17</sub>NO<sub>4</sub>  
Molecular Weight: 263,2930 g.mol<sup>-1</sup>

Mixture of two rotameres, description of the major:

<sup>1</sup>H NMR (400 MHz, CDCl<sub>3</sub>):  $\delta$  (ppm) 7.79 (bs, 1H), 7.07-6.96 (m, 1H), 6.93 (s, 1H), 3.90-3.67 (m, 6H), 3.42 (d, *J* = 16.2 Hz, 1H), 3.00 (d, *J* = 16.2 Hz, 1H), 2.29 (s, 3H), 1.68 (s, 3H)

<sup>13</sup>C NMR (101 MHz, CDCl<sub>3</sub>):  $\delta$  (ppm) 173.9, 152.9, 139.9,

132.8, 128.6, 127.2, 125.2, 115.0, 67.7, 52.7, 42.9, 23.6,  
20.9

**IR** (neat):  $\nu$  (cm<sup>-1</sup>) 2953, 2857, 1745, 1705, 1493, 1361, 1073, 763

**HRMS (ESI)**: Calcd for C<sub>14</sub>H<sub>17</sub>NNaO<sub>4</sub> [M+Na]<sup>+</sup>: 286.1050, found 286,1052

$[\alpha]_D^{20} = -3.4^\circ$  (c = 1.00, CHCl<sub>3</sub>)

**HPLC separation**: Chiralpak IA; 97:3 (*n*-heptane/*i*-PrOH), 1.0 ml.min<sup>-1</sup>, 243 nm, t<sub>r</sub>(major) = 23.3 min, t<sub>r</sub>(minor) = 33.9 min, 93:7 e.r.

**methyl 2,2a-dihydro-1H-cyclobuta[b]indole-3(7bH)-carboxylate (2aa):**

The title compound was prepared according to the **General procedure F** (0.5 mmol scale, 140 °C/48 h) and purified by chromatography to give a slight yellow oil (18 mg, 18% yield).

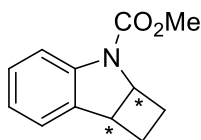

Chemical Formula: C<sub>12</sub>H<sub>13</sub>NO<sub>2</sub>  
Molecular Weight: 203,2410 g.mol<sup>-1</sup>

**<sup>1</sup>H NMR** (400 MHz, CDCl<sub>3</sub>):  $\delta$  (ppm) 7.93 (d, *J* = 7.1 Hz, 1H), 7.23 (t, *J* = 7.3 Hz, 1H), 7.14 (d, *J* = 7.4 Hz, 1H), 7.00 (td, *J* = 7.4, 1.0 Hz, 1H), 4.99-4.75 (m, 1H), 4.00-3.73 (m, 4H), 2.70-2.46 (m, 2H), 2.32-2.15 (m, 1H), 2.07-1.95 (m, 1H)

**<sup>13</sup>C NMR** (101 MHz, CDCl<sub>3</sub>):  $\delta$  (ppm) 153.2, 143.8, 135.8, 128.0, 124.7, 123.1, 115.4, 58.5, 52.5, 41.1, 29.4, 26.8

**IR** (neat):  $\nu$  (cm<sup>-1</sup>) 2947, 2853, 1702, 1386, 1062, 747

**HRMS (ESI)**: Calcd for C<sub>12</sub>H<sub>13</sub>NNaO<sub>2</sub> [M+Na]<sup>+</sup>: 226.0838, found 226,0838

$[\alpha]_D^{20} = -39.2^\circ$  (c = 1.00, CHCl<sub>3</sub>)

**HPLC separation**: Chiralpak IA; 99:1 (*n*-heptane/*i*-PrOH), 1.0 ml.min<sup>-1</sup>, 245 nm, t<sub>r</sub>(minor) = 9.1 min, t<sub>r</sub>(major) = 10.1 min, 97:3 e.r.

**methyl 6-fluoro-2,2a-dihydro-1H-cyclobuta[b]indole-3(7bH)-carboxylate (2ab):**

The title compound was prepared according to the **General procedure F** (0.5 mmol scale, 140 °C/48 h) and purified by chromatography to give a white solid (25 mg, 23% yield).

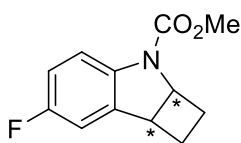

Chemical Formula: C<sub>12</sub>H<sub>12</sub>FNO<sub>2</sub>  
Molecular Weight: 221,2314 g.mol<sup>-1</sup>

**<sup>1</sup>H NMR** (400 MHz, CDCl<sub>3</sub>):  $\delta$  (ppm) 7.85 (dd, *J* = 7.4, 4.1 Hz, 1H), 6.90 (t, *J* = 8.6 Hz, 1H), 6.84 (dd, *J* = 8.1, 2.3 Hz, 1H), 5.01-4.77 (m, 1H), 3.96-3.69 (m, 4H), 2.67-2.43 (m, 2H), 2.32-2.15 (m, 1H), 2.07-1.94 (m, 1H)

<sup>13</sup>C NMR (101 MHz, CDCl<sub>3</sub>): δ (ppm) 159.3 (d, *J* = 240.9 Hz), 153.2, 139.8, 137.6, 116.1, 114.2 (d, *J* = 22.7 Hz), 111.9 (d, *J* = 24.0 Hz), 58.9, 52.6, 41.1, 29.4, 26.7

<sup>19</sup>F NMR (376 MHz, CDCl<sub>3</sub>): δ (ppm) -120.88 (s)

IR (neat): ν (cm<sup>-1</sup>) 2994, 2951, 2920, 2851, 1705, 1248, 1071, 853, 751

HRMS (ESI): Calcd for C<sub>12</sub>H<sub>12</sub>FNNaO<sub>2</sub> [M+Na]<sup>+</sup>: 244.0744, found 244,0745

Mp: 57-60 °C

[α]<sub>D</sub><sup>20</sup> = -29.4° (c = 0.50, CHCl<sub>3</sub>)

HPLC separation: Chiralpak IA; 99.5:0.5 (*n*-heptane/*i*-PrOH), 0.5 ml.min<sup>-1</sup>, 242 nm, t<sub>r</sub>(minor) = 17.8 min, t<sub>r</sub>(major) = 20.4 min, 97:3 e.r.

#### (*S*)-methyl 2-ethylindoline-1-carboxylate (**2ac**):

The title compound was prepared according to the **General procedure F** (0.2 mmol scale, 120 °C/24 h) and purified by chromatography to give a colorless oil (12.6 mg, 31% yield). NMR spectroscopic data are consistent with those previously reported.<sup>[14]</sup> **2ac** was assigned a (*S*) absolute configuration by comparison of HPLC data with those previously reported.<sup>[13]</sup>

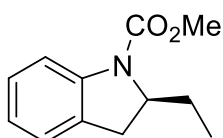

Chemical Formula: C<sub>12</sub>H<sub>15</sub>NO<sub>2</sub>  
Molecular Weight: 205,2570 g.mol<sup>-1</sup>

<sup>1</sup>H NMR (400 MHz, CDCl<sub>3</sub>): δ (ppm) 7.72 (bs, 1H), 7.19-7.13 (m, 2H), 6.95 (td, *J* = 7.4, 1.0 Hz, 1H), 4.39 (m, 1H), 3.84 (s, 3H), 3.28 (dd, *J* = 16.1, 9.7 Hz, 1H), 2.76 (dd, *J* = 16.1, 2.2 Hz, 1H), 1.78 (m, 1H), 1.67-1.49 (m, 1H), 0.88 (t, *J* = 7.5 Hz, 3H)

<sup>13</sup>C NMR (101 MHz, CDCl<sub>3</sub>): δ (ppm) 153.9, 142.0, 130.5, 127.4, 124.9, 122.8, 115.4, 60.7, 52.5, 32.9, 27.4, 9.1

[α]<sub>D</sub><sup>20</sup> = +26.3° (c = 0.96, CHCl<sub>3</sub>)

HPLC separation: Chiralpak AD-H; 99:1 (*n*-heptane/*i*-PrOH), 0.5 ml.min<sup>-1</sup>, 243 nm, t<sub>r</sub>(minor) = 20.6 min, t<sub>r</sub>(major) = 26.4 min, 73:27 e.r.

**(S)-2-methylindoline-1-Ferrocenoyl (5a):**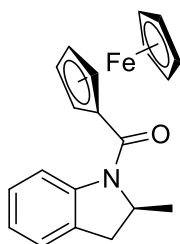

Chemical Formula: C<sub>20</sub>H<sub>19</sub>FeNO  
Molecular Weight: 345,2230 g.mol<sup>-1</sup>

<sup>1</sup>H NMR (400 MHz, CDCl<sub>3</sub>): δ (ppm) 7.78 (bs, 1H), 7.21 (d, *J* = 7.4 Hz, 1H), 7.14 (t, *J* = 6.9 Hz, 1H), 7.01 (t, *J* = 7.4 Hz, 1H), 4.97-4.86 (m, 1H), 4.83-4.71 (m, *J* = 10.2 Hz, 2H), 4.41-4.35 (m, 2H), 4.26 (s, 4H), 3.39 (dd, *J* = 15.5, 8.6 Hz, 1H), 2.64 (d, *J* = 15.5 Hz, 1H), 1.29 (d, *J* = 6.4 Hz, 3H)

<sup>13</sup>C NMR (101 MHz, CDCl<sub>3</sub>): δ (ppm) 168.6, 142.5, 131.0, 127.2, 125.3, 123.7, 118.0, 79.4, 72.8, 71.0, 70.4, 70.2, 70.0, 69.7, 56.6, 36.7, 21.7

IR (neat): ν (cm<sup>-1</sup>) 2958, 2920, 1632, 1385, 756, 480

HRMS (ESI): Calcd for C<sub>20</sub>H<sub>19</sub>FeNNaO [M+H]<sup>+</sup>: 346.0894, found 346.0889

Mp: 130-133 °C

[α]<sub>D</sub><sup>20</sup> = +13.9° (c = 1.09, CHCl<sub>3</sub>)

HPLC separation: Chiralcel OJ-H; 97:3 (*n*-heptane/*i*-PrOH), 1.0 ml.min<sup>-1</sup>, 272 nm, t<sub>r</sub>(minor) = 15.1 min, t<sub>r</sub>(major) = 17.1 min, 93:7 e.r.

**methyl (S)-2-methylindoline-2-carboxylate-1-ferrocenoyl (5u):**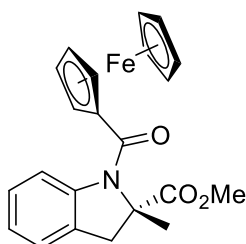

Chemical Formula: C<sub>22</sub>H<sub>21</sub>FeNO<sub>3</sub>  
Molecular Weight: 403,2590 g.mol<sup>-1</sup>

<sup>1</sup>H NMR (400 MHz, CDCl<sub>3</sub>): δ (ppm) 7.15-7.10 (m, 1H), 6.94-6.85 (m, 2H), 6.61-6.55 (m, 1H), 4.81 (dt, *J* = 2.5, 1.3 Hz, 1H), 4.63 (dt, *J* = 2.5, 1.2 Hz, 1H), 4.41 (td, *J* = 2.5, 1.3 Hz, 1H), 4.31 (td, *J* = 2.5, 1.3 Hz, 1H), 4.26 (s, 4H), 3.81 (s, 3H), 3.45 (d, *J* = 15.6 Hz, 1H), 2.93 (d, *J* = 15.6 Hz, 1H), 1.73 (s, 3H)

<sup>13</sup>C NMR (101 MHz, CDCl<sub>3</sub>): δ (ppm) 173.5, 169.2, 142.2, 129.7, 126.7, 125.3, 123.0, 115.6, 79.2, 72.2, 70.6, 70.3, 70.2, 69.8, 69.3, 52.8, 41.9, 21.7

IR (neat): ν (cm<sup>-1</sup>) 2924, 2853, 1740, 1318, 747, 482

HRMS (ESI): Calcd for C<sub>22</sub>H<sub>21</sub>FeNNaO<sub>3</sub> [M+Na]<sup>+</sup>: 426.0763, found 426,0761

Mp: 61-63 °C

[α]<sub>D</sub><sup>20</sup> = -163° (c = 1.00, CHCl<sub>3</sub>)



**HPLC separation:** Chiralpak IA; 99:1 (*n*-heptane/*i*-PrOH), 1.0 ml.min<sup>-1</sup>, 210 nm, *t*<sub>r</sub>(major) = 16.1 min, *t*<sub>r</sub>(minor) = 20.6 min, 90:10 e.r

### **Computational details (Figure 1)**

DFT-D3 calculations were performed with Gaussian 09 D.01, with the hybrid PBE0 functional,<sup>[15]</sup> and the D3(bj) correction.<sup>[16]</sup> The Pd atom was represented by the relativistic effective core potential (RECP) from the Stuttgart group and the associated basis set augmented by a f polarization function ( $\alpha = 1.472$ ).<sup>[17]</sup> The remaining atoms (C, H, N, O) were represented by a SVP basis set.<sup>[18]</sup> The solvent (mesitylene) influence was taken into consideration through single point calculations on the gas-phase optimized geometry within the SMD model.<sup>[19]</sup> For the SCRF calculations, the atoms were treated with a Def2-svp basis sets.<sup>[20]</sup>

### **Cartesian coordinates of optimized $\kappa^2$ -complex**

150

|    |          |          |          |
|----|----------|----------|----------|
| P  | 2.35355  | -1.75949 | -1.22005 |
| C  | 1.42865  | -2.75023 | 1.54535  |
| C  | 1.94846  | -5.03260 | 3.15432  |
| C  | 2.73360  | -3.18647 | 1.81571  |
| C  | 0.38397  | -3.43577 | 2.19823  |
| C  | 0.64857  | -4.58161 | 2.95743  |
| C  | 2.99945  | -4.30154 | 2.60933  |
| H  | 3.58199  | -2.63226 | 1.42254  |
| H  | -0.19611 | -5.10535 | 3.41005  |
| H  | 4.03551  | -4.59778 | 2.79241  |
| H  | 2.13810  | -5.92591 | 3.75362  |
| Pd | 1.00015  | -1.13411 | 0.47145  |
| O  | -1.04753 | -0.02693 | 1.34055  |
| O  | 0.50896  | 0.80520  | -0.47123 |
| P  | -0.71385 | 1.07637  | 0.38572  |
| O  | -1.90827 | 1.51915  | -0.64314 |
| O  | -0.55242 | 2.47436  | 1.22633  |
| C  | -0.40894 | 3.63497  | 0.51383  |
| C  | -1.54296 | 4.20621  | -0.03669 |
| C  | 1.00245  | 5.36538  | -0.35243 |
| C  | -1.40491 | 5.38221  | -0.83996 |
| C  | 0.89634  | 4.18303  | 0.35333  |
| C  | -0.11371 | 5.98110  | -0.96404 |
| C  | -2.48846 | 5.96326  | -1.54795 |
| H  | 1.02341  | 7.62081  | -1.80792 |
| H  | 1.97862  | 5.84405  | -0.45903 |
| C  | -2.31076 | 7.10187  | -2.29938 |
| H  | -3.47035 | 5.49171  | -1.49717 |
| H  | -3.15809 | 7.52950  | -2.84017 |
| C  | -1.04289 | 7.71974  | -2.38352 |
| H  | -0.91817 | 8.62772  | -2.97764 |
| C  | 0.03266  | 7.16539  | -1.73268 |
| C  | -2.99656 | 2.20750  | -0.17021 |
| C  | -2.85231 | 3.54164  | 0.17565  |
| C  | -5.31264 | 2.19784  | 0.44968  |

|   |          |          |          |
|---|----------|----------|----------|
| C | -3.96319 | 4.22478  | 0.76603  |
| C | -4.23094 | 1.50914  | -0.05936 |
| C | -5.21054 | 3.53935  | 0.88659  |
| C | -3.86792 | 5.54558  | 1.27587  |
| H | -7.27315 | 3.68042  | 1.53180  |
| H | -6.28146 | 1.69726  | 0.51879  |
| C | -4.95964 | 6.16667  | 1.83722  |
| H | -2.91067 | 6.06598  | 1.22868  |
| H | -4.86145 | 7.18172  | 2.22884  |
| C | -6.20333 | 5.50179  | 1.91899  |
| H | -7.06374 | 6.00860  | 2.36154  |
| C | -6.32175 | 4.21309  | 1.45682  |
| C | 2.10101  | 3.49110  | 0.86421  |
| C | 4.43814  | 2.19287  | 1.77191  |
| C | 2.09636  | 2.74459  | 2.05409  |
| C | 3.29554  | 3.56098  | 0.13905  |
| C | 4.45384  | 2.93401  | 0.59718  |
| C | 3.24392  | 2.09071  | 2.48413  |
| H | 1.18618  | 2.66285  | 2.64431  |
| H | 3.32139  | 4.10131  | -0.80912 |
| H | 5.34049  | 1.69477  | 2.12687  |
| C | -4.36366 | 0.09895  | -0.48552 |
| C | -4.75661 | -2.55289 | -1.33413 |
| C | -5.11153 | -0.79739 | 0.28392  |
| C | -3.78275 | -0.36284 | -1.67367 |
| C | -3.97805 | -1.67635 | -2.08767 |
| C | -5.31124 | -2.10665 | -0.14170 |
| H | -5.51724 | -0.47977 | 1.24565  |
| C | 3.19406  | 1.19922  | 3.69522  |
| C | 5.70851  | 3.04727  | -0.22343 |
| F | 6.75594  | 2.47664  | 0.37528  |
| F | 6.02336  | 4.32117  | -0.46739 |
| F | 5.56764  | 2.45204  | -1.42038 |
| F | 2.15322  | 1.46985  | 4.48014  |
| F | 4.30387  | 1.30480  | 4.43119  |
| F | 3.09177  | -0.08955 | 3.33134  |
| C | 2.19767  | -0.58197 | -2.65958 |
| C | 0.58370  | 0.54250  | -4.27797 |
| C | 2.54374  | 1.81844  | -3.44136 |
| C | 1.06858  | 1.90406  | -3.80194 |
| C | 2.79565  | 0.79508  | -2.33930 |
| C | 0.76413  | -0.52675 | -3.20570 |
| H | 1.14453  | 0.25842  | -5.18769 |
| H | 3.12071  | 1.54754  | -4.34508 |
| H | 0.48901  | 2.21013  | -2.91402 |
| H | 2.36290  | 1.17100  | -1.40289 |
| H | 0.06928  | -0.31764 | -2.38057 |
| H | 2.82960  | -1.05570 | -3.43496 |
| H | -0.47886 | 0.57635  | -4.56635 |
| H | 2.93142  | 2.79665  | -3.11307 |
| H | 0.90227  | 2.66773  | -4.57871 |
| H | 3.87839  | 0.70147  | -2.18676 |
| H | 0.49003  | -1.50407 | -3.62715 |
| C | 4.17030  | -1.84783 | -0.87041 |
| C | 6.50293  | -2.16832 | -1.74564 |
| C | 6.12636  | -0.99830 | 0.45170  |
| C | 7.00784  | -1.09490 | -0.78847 |
| C | 4.66822  | -0.75503 | 0.07824  |
| C | 5.04238  | -1.94004 | -2.12722 |
| H | 6.60052  | -3.16022 | -1.26803 |

|   |          |          |          |
|---|----------|----------|----------|
| H | 6.20175  | -1.93532 | 1.03340  |
| H | 7.00853  | -0.11694 | -1.30152 |
| H | 4.57430  | 0.22716  | -0.40444 |
| H | 4.96434  | -1.00466 | -2.70475 |
| H | 4.27542  | -2.80882 | -0.34134 |
| H | 7.12461  | -2.19944 | -2.65490 |
| H | 6.48684  | -0.19441 | 1.11215  |
| H | 8.05254  | -1.29757 | -0.50360 |
| H | 4.03161  | -0.70662 | 0.97486  |
| H | 4.69295  | -2.74975 | -2.78847 |
| C | 1.92247  | -3.40228 | -1.97587 |
| C | 2.31702  | -5.88771 | -2.13749 |
| C | 0.06040  | -4.93989 | -2.67507 |
| C | 0.81496  | -6.14027 | -2.12091 |
| C | 0.41620  | -3.67470 | -1.90274 |
| C | 2.69068  | -4.59932 | -1.40823 |
| H | 2.66202  | -5.82228 | -3.18563 |
| H | 0.31199  | -4.80372 | -3.74309 |
| H | 0.49026  | -6.31790 | -1.07997 |
| H | 0.13384  | -3.79923 | -0.84552 |
| H | 2.45797  | -4.69983 | -0.33550 |
| H | 2.20725  | -3.28267 | -3.03927 |
| H | 2.85862  | -6.73405 | -1.68509 |
| H | -1.02559 | -5.10632 | -2.63876 |
| H | 0.57361  | -7.05293 | -2.68956 |
| H | -0.16580 | -2.82250 | -2.27807 |
| H | 3.77786  | -4.44711 | -1.48602 |
| N | -0.94272 | -2.91267 | 2.21714  |
| C | -1.93832 | -3.43700 | 1.45573  |
| O | -3.10077 | -3.09798 | 1.50113  |
| O | -1.48865 | -4.42422 | 0.65290  |
| C | -2.46409 | -5.05755 | -0.14835 |
| H | -2.67463 | -4.46036 | -1.04668 |
| H | -3.40052 | -5.19695 | 0.40804  |
| H | -2.04254 | -6.02623 | -0.44447 |
| C | -1.36339 | -2.07238 | 3.36367  |
| H | -2.07355 | -1.35222 | 2.93822  |
| C | -2.07304 | -2.90972 | 4.42232  |
| H | -2.46028 | -2.25634 | 5.21910  |
| H | -1.38499 | -3.63191 | 4.88983  |
| H | -2.92625 | -3.44764 | 3.98600  |
| C | -0.19870 | -1.30315 | 3.96061  |
| H | 0.30360  | -0.68173 | 3.20941  |
| H | 0.54661  | -1.96806 | 4.42250  |
| H | -0.58284 | -0.62943 | 4.74021  |
| H | -3.17445 | 0.30813  | -2.27876 |
| H | -4.90482 | -3.58383 | -1.65608 |
| C | -3.37739 | -2.14373 | -3.38254 |
| C | -6.15123 | -3.03379 | 0.69341  |
| F | -7.45289 | -2.89260 | 0.39132  |
| F | -6.02875 | -2.78951 | 1.99425  |
| F | -5.84713 | -4.31786 | 0.47905  |
| F | -4.23280 | -2.03219 | -4.40255 |
| F | -2.28475 | -1.44293 | -3.70822 |
| F | -3.01541 | -3.43495 | -3.32258 |

## References

- [1] a) K. B. Simonsen, K. V. Gothelf, K. A. Jørgensen. *J. Org. Chem.* **1998**, *63*, 7536; b) P. Wipf, J.-K. Jung. *J. Org. Chem.* **2000**, *65*, 6319; c) T. Akiyama, J. Itoh, K. Yokota, K. Fuchibe, *Angew. Chem. Int. Ed.* **2004**, *43*, 1566; d) D. Uruguchi, M. Terada, *J. Am. Chem. Soc.* **2004**, *126*, 5356; e) R. I. Storer, D. E. Carrera, Y. Ni, D. W. C. MacMillan. *J. Am. Chem. Soc.* **2006**, *128*, 84; f) P. Jiao, D. Nakashima, H. Yamamoto. *Angew. Chem. Int. Ed.* **2008**, *47*, 2411; g) M. Hatano, T. Ikeno, T. Matsumura, S. Torii, K. Ishihara. *Adv. Synth. Catal.* **2008**, *350*, 1776; h) N. V. Sewgobind, M. J. Wanner, S. Ingemann, R. de Gelder, J. H. van Maarseveen, H. Hiemstra. *J. Org. Chem.* **2008**, *73*, 6405; i) G. Pousse, A. Devineau, V. Dalla, L. Humphreys, M.-C. Lasne, J. Rouden, J. Blanchet. *Tetrahedron* **2009**, *65*, 10617; j) W. Hu, J. Zhou, X. Xu, W.-J. Liu, L.-Z. Gong, *Org. Synth.* **2011**, *88*, 406; k) N. Momiyama, H. Nishimoto, M. Terada. *Org. Lett.* **2011**, *13*, 2126; l) T. Kano, T. Yurino, K. Maruoka. *Angew. Chem. Int. Ed.* **2013**, *52*, 11509.
- [2] L. Weber, D. Eickhoff, J. Kahlert, L. Böling, A. Brockhinke, H.-G. Stammer, B. Neumann, M. A. Foxb. *Dalton Trans.* **2012**, *41*, 10328.
- [3] T. J. Reddy, M. Leclair, M. Proulx, *Synlett* **2005**, 583.
- [4] F. Labrie, S. M. Singh, R. Labrecque, L. C. Ciobanu. US 20150175576A1.
- [5] T. Watanabe, S. Oishi, N. Fujii, H. Ohno, *Org. Lett.* **2008**, *10*, 1759.
- [6] I. Ugarriza, U. Uria, L. Carrillo, J. L. Vicario, E. Reyes. *Chem. Eur. J.* **2014**, *20*, 11650.
- [7] C. Dockendorff, P. W. Faloon, M. Yu, W. Youngsaye, M. Penman, T. J. F. Nieland, P. P. Nag, T. A. Lewis, J. Pu, M. Bennion, J. Negri, C. Paterson, G. Lam, S. Dandapani, J. R. Perez, B. Munoz, M. A. Palmer, S. L. Schreiber, M. Krieger. *ACS Med. Chem. Lett.* **2015**, *6*, 375.
- [8] J. Zhao, Z. Wei, X. Zeng, X. Liu. *Dalton Trans.* **2012**, *41*, 11125.
- [9] S. W. Wright, R. L. Dow, L. D. McClure, D. L. Hageman. *Tetrahedron Lett.* **1996**, *37*, 6965.
- [10] E. Larionov, M. Nakanishi, D. Katayev, C. Besnard, E. P. Kündig, *Chem. Sci.* **2013**, *4*, 1995.
- [11] P. A. Donets, T. Saget, N. Cramer, *Organometallics* **2012**, *31*, 8040.
- [12] S. Rousseaux, B. Liégault, K. Fagnoux, *Chem. Sci.* **2012**, *3*, 244.
- [13] D. Katayev, M. Nakanishi, T. Bürgi, E. P. Kündig, *Chem. Sci.*, **2012**, *3*, 1422.
- [14] S. Anas, A. Cordi, H. B. Kagan, *Chem. Commun.* **2011**, *47*, 11483.
- [15] C. Adamo, V. J. Barone, *Chem. Phys.* **1999**, *110*, 6158.
- [16] a) S. Grimme, J. Antony, S. Ehrlich, H. J. Krieg, *Chem. Phys.* **2010**, *132*, 154104; b) S. Grimme, S. Ehrlich, L. J. Goerigk, *J. Comput. Chem.* **2011**, *32*, 1456.

- [17] P. C. Hariharan, J. A. Pople, *Theor. Chim. Acta* **1973**, 28, 213.
- [18] A. Schaefer, H. Horn, R. J. Ahlrichs, *Chem. Phys.* **1992**, 97, 2571.
- [19] A. V. Marenich, C. J. Cramer, D. G. Truhlar, *J. Phys. Chem. B* **2009**, 113, 6378.
- [20] F. Weigend, R. Ahlrichs, *Phys. Chem. Chem. Phys.* **2005**, 7, 3297.

## NMR Spectra and chromatograms

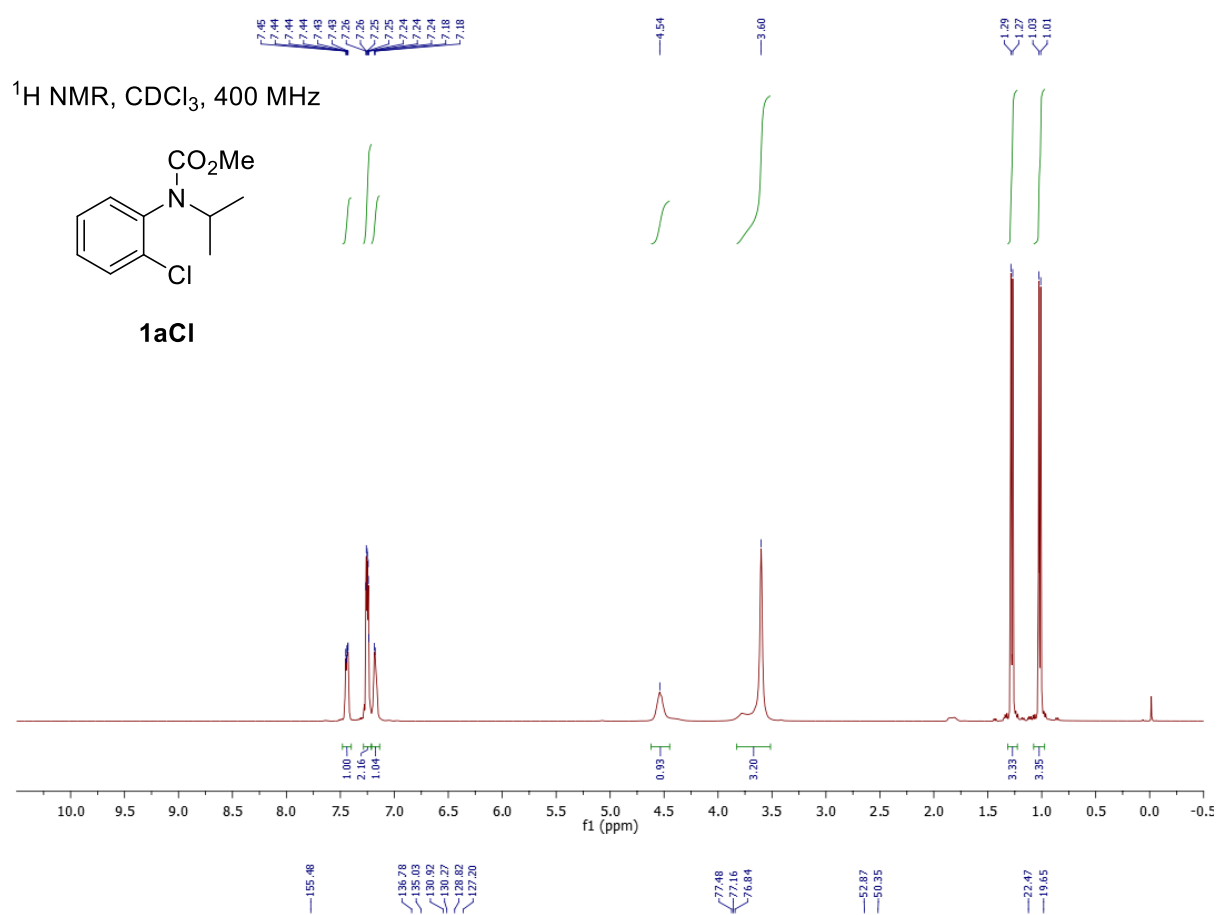

<sup>13</sup>C NMR, CDCl<sub>3</sub>, 101 MHz

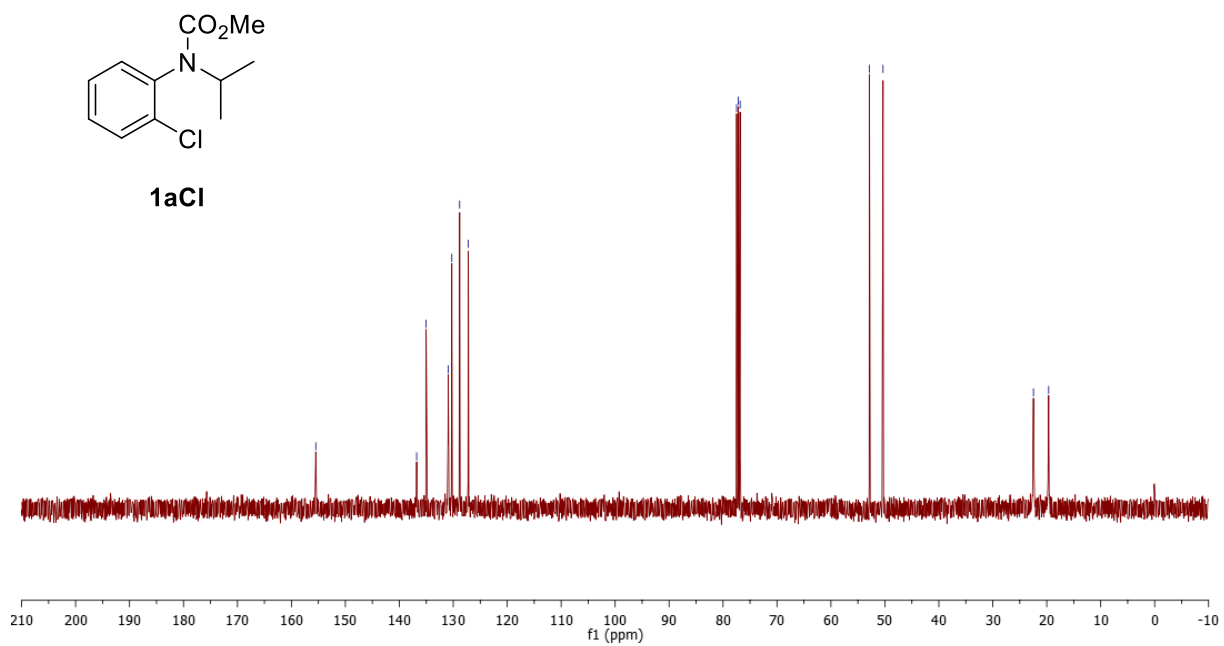

<sup>1</sup>H NMR, CDCl<sub>3</sub>, 400 MHz

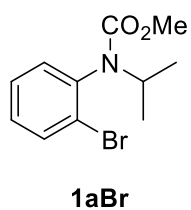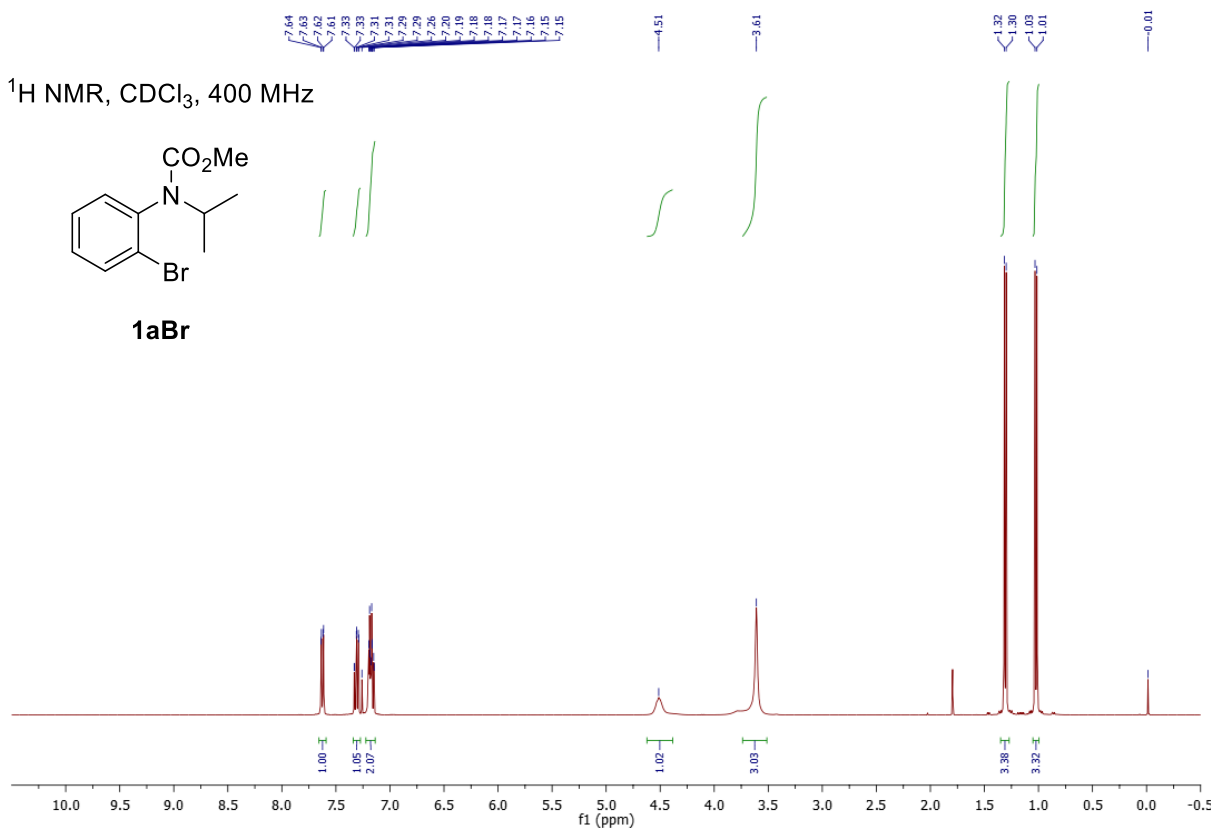

<sup>13</sup>C NMR, CDCl<sub>3</sub>, 101 MHz

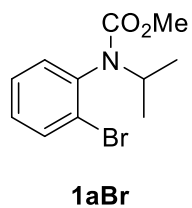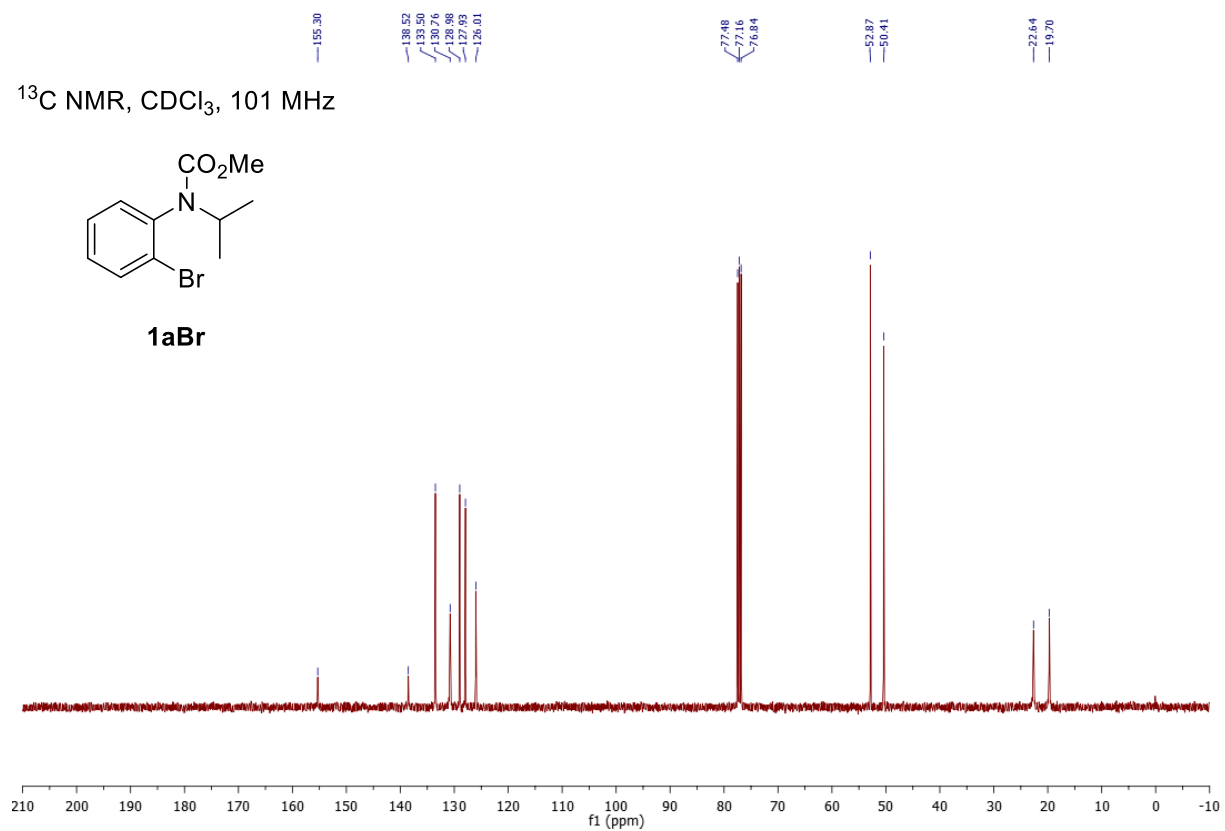

<sup>1</sup>H NMR, CDCl<sub>3</sub>, 400 MHz

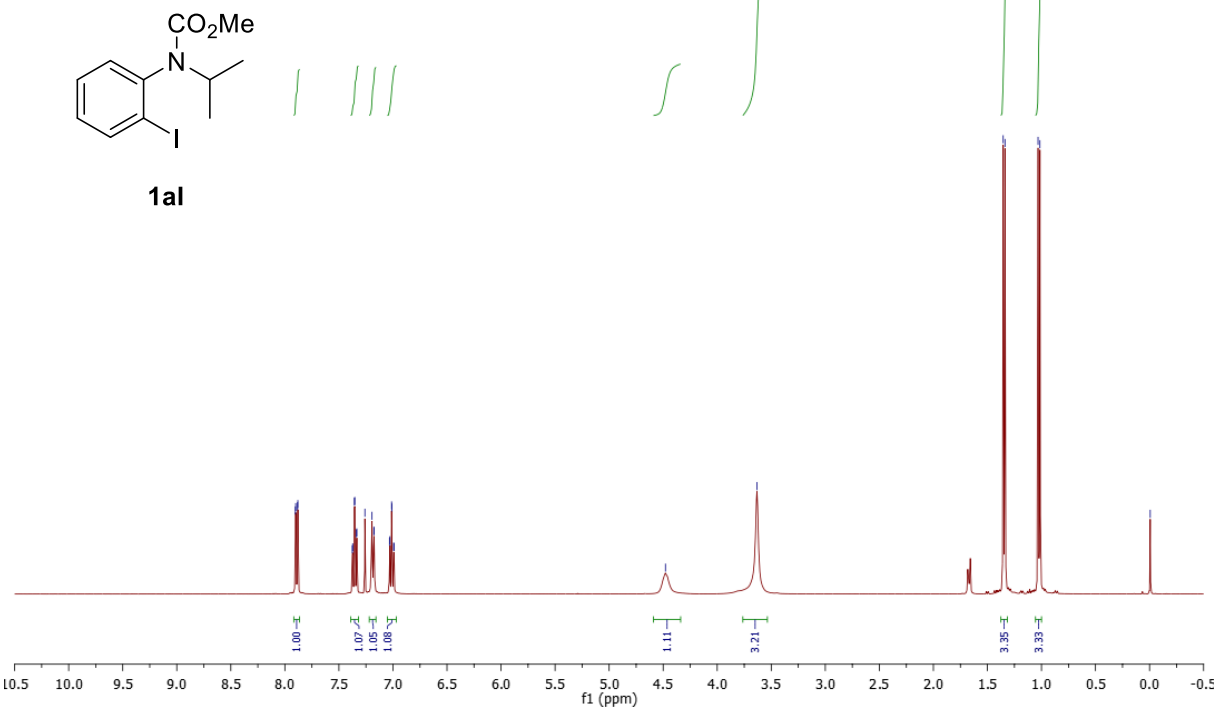

<sup>13</sup>C NMR, CDCl<sub>3</sub>, 101 MHz

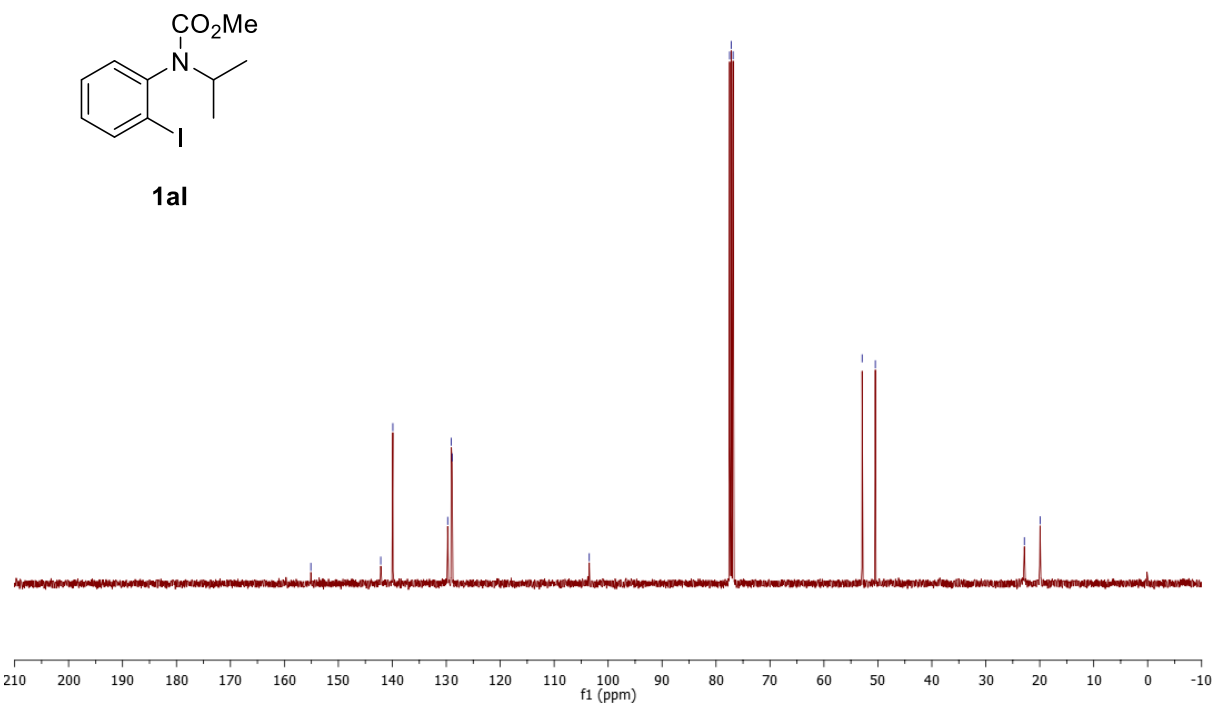



<sup>1</sup>H NMR, CDCl<sub>3</sub>, 400 MHz

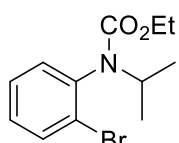

**1b**

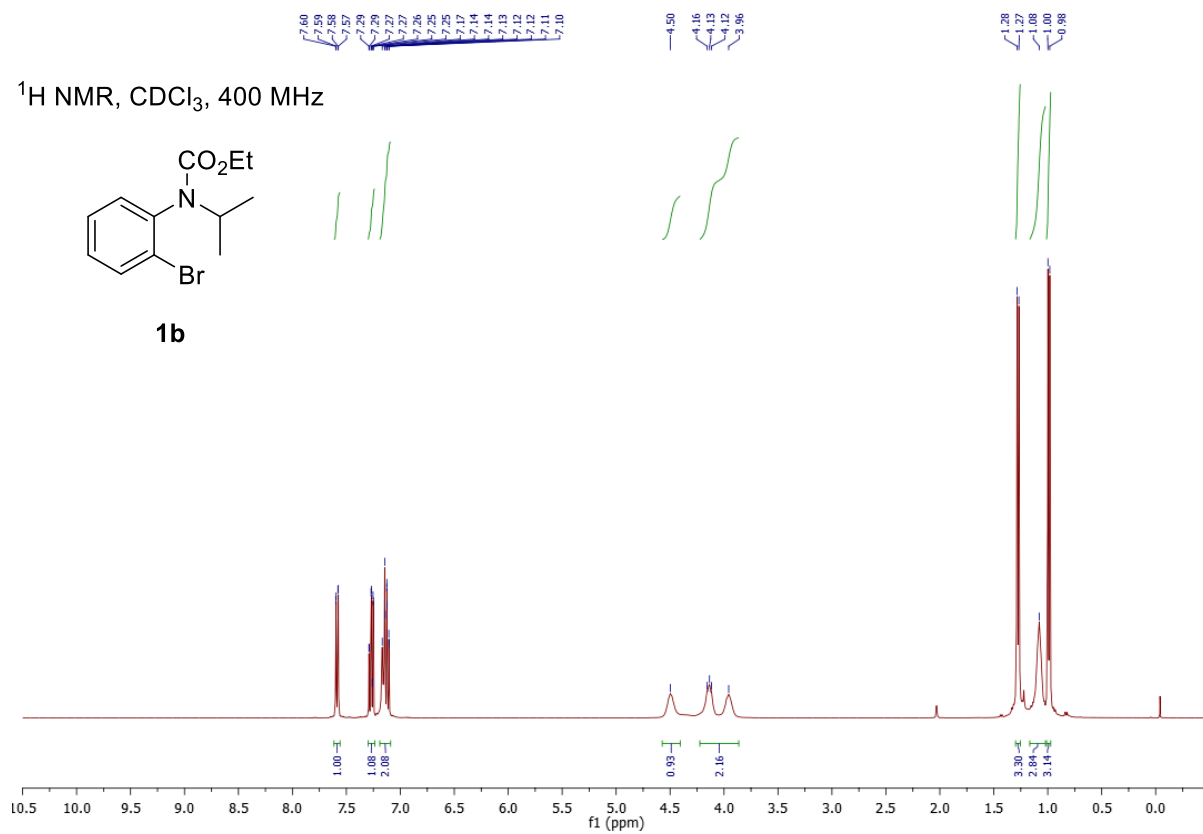

<sup>13</sup>C NMR, CDCl<sub>3</sub>, 101 MHz

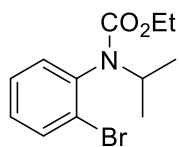

**1b**

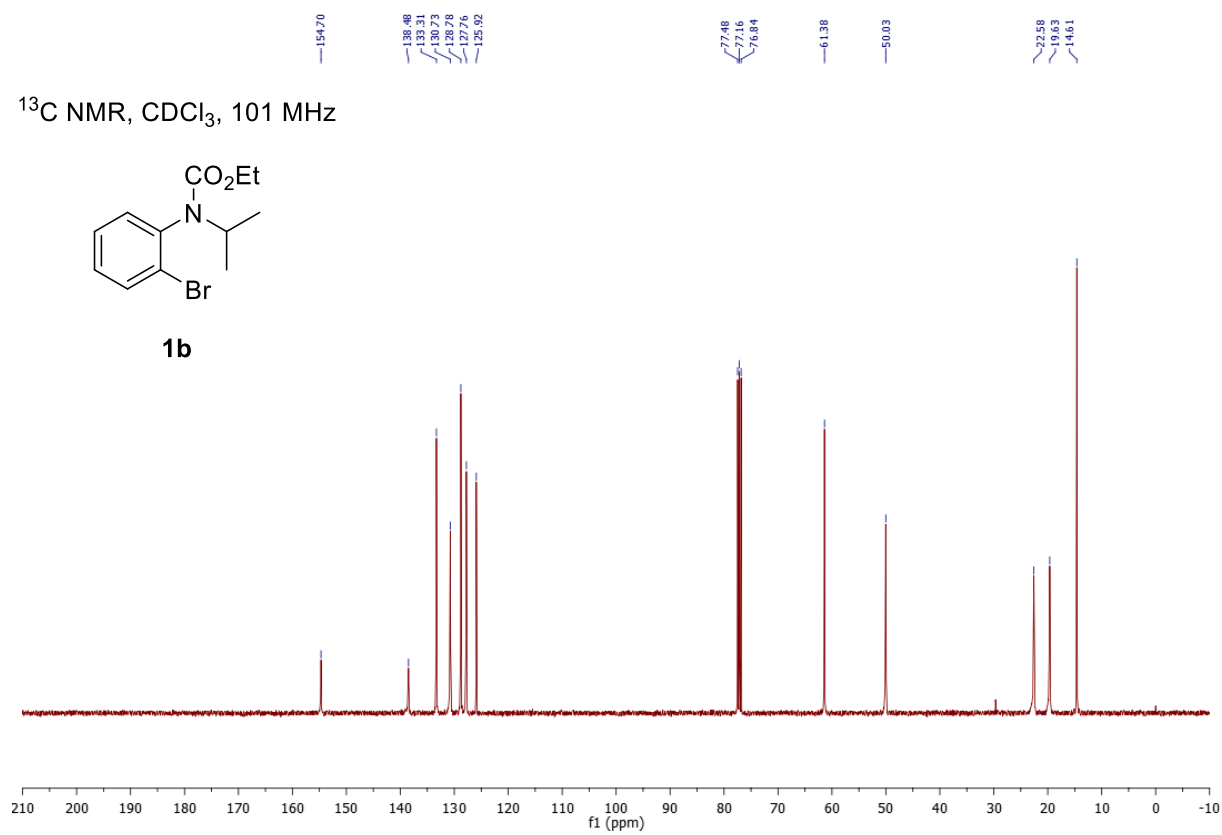

$^1\text{H}$  NMR,  $\text{CDCl}_3$ , 400 MHz

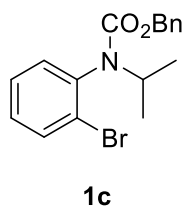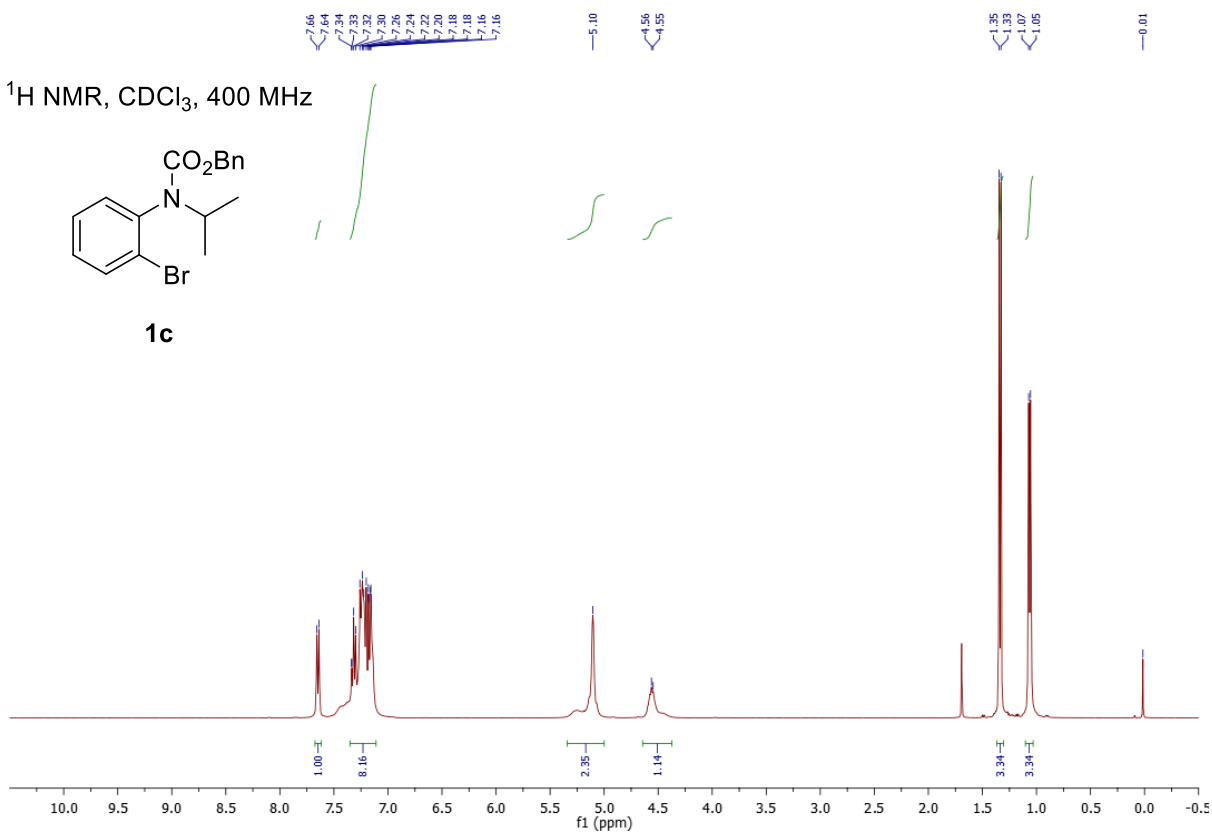

$^{13}\text{C}$  NMR,  $\text{CDCl}_3$ , 101 MHz

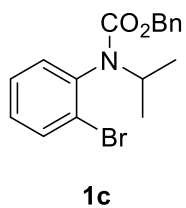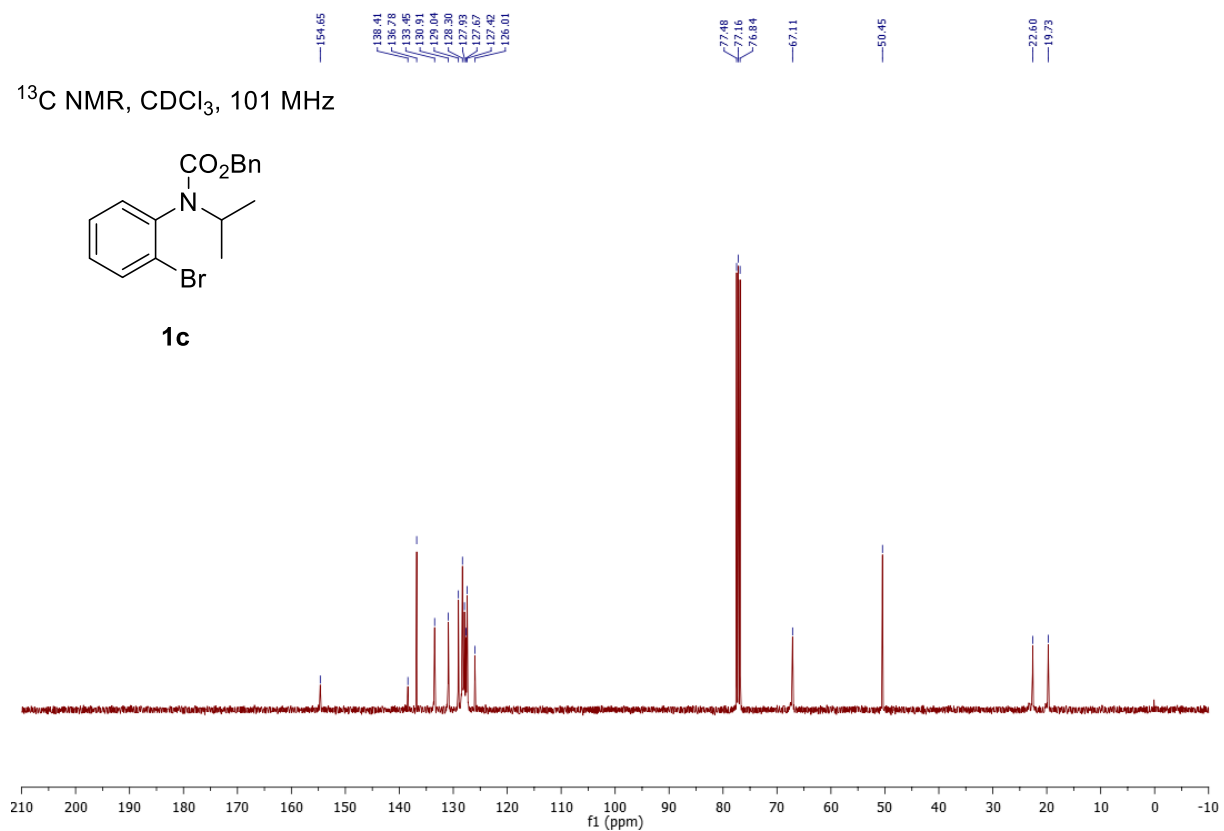

<sup>1</sup>H NMR, CDCl<sub>3</sub>, 400 MHz

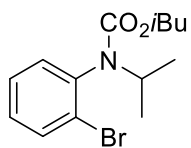

**1d**

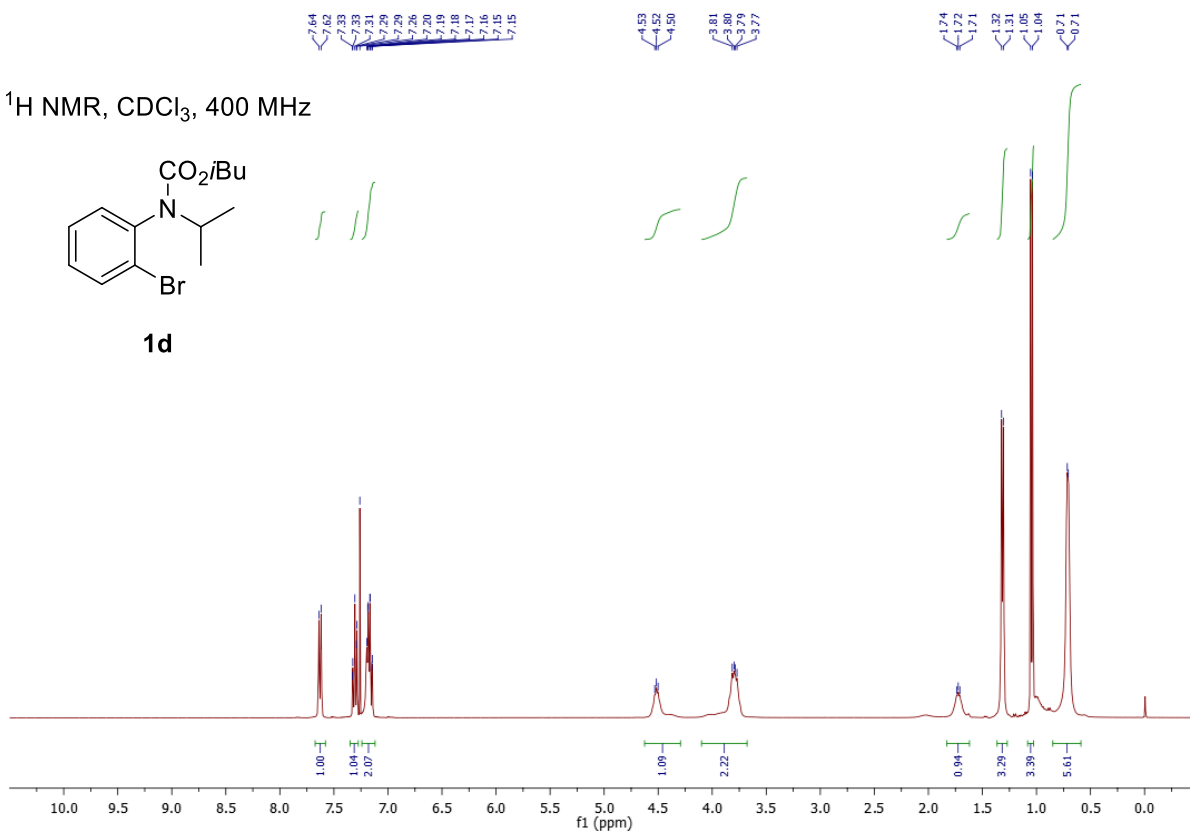

<sup>13</sup>C NMR, CDCl<sub>3</sub>, 101 MHz

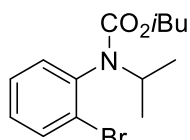

**1d**

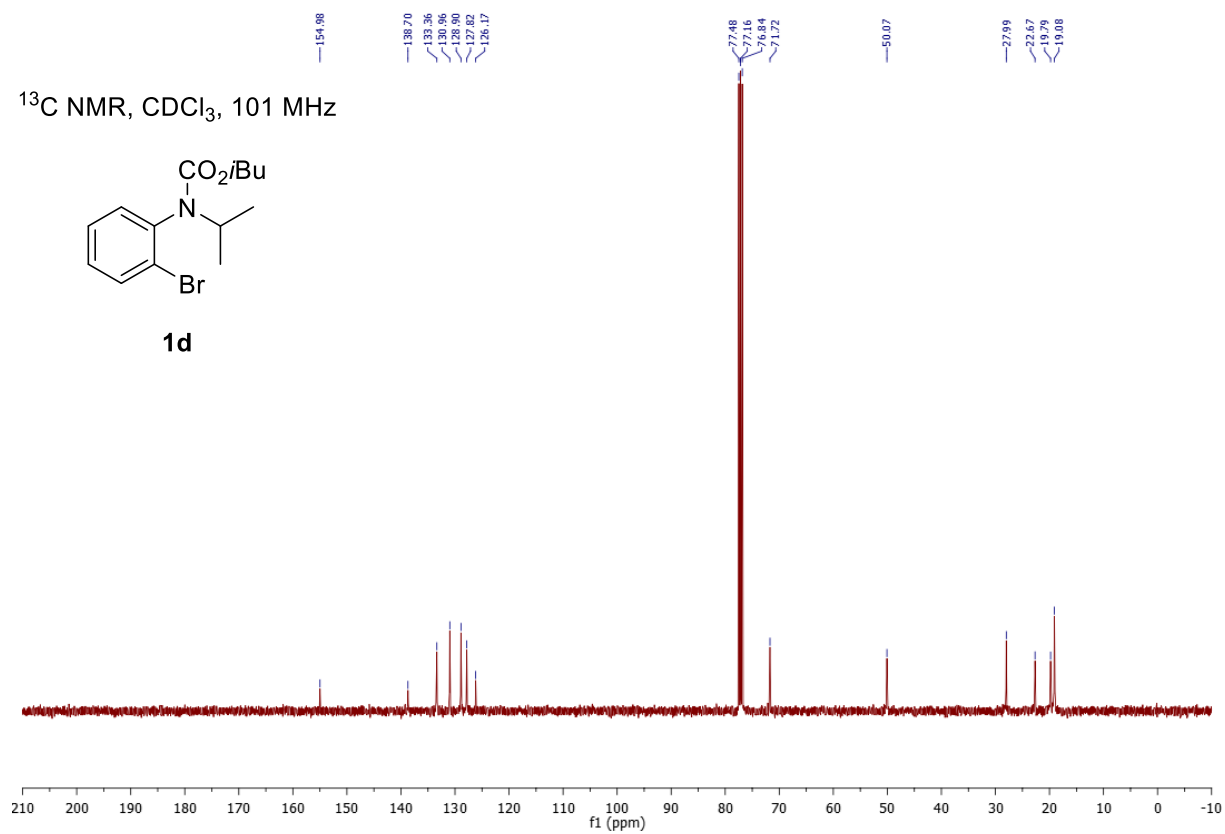

<sup>1</sup>H NMR, CDCl<sub>3</sub>, 400 MHz

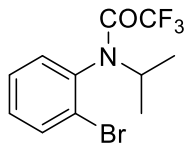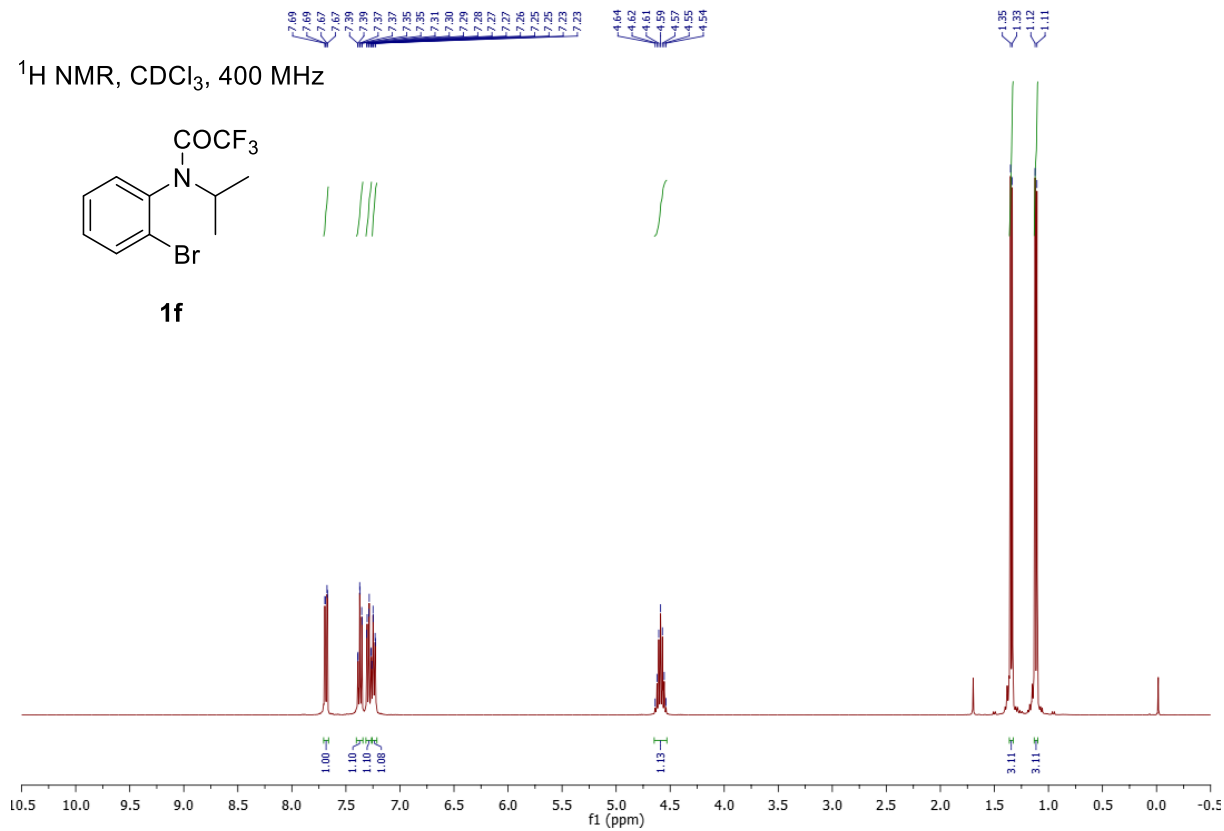

<sup>13</sup>C NMR, CDCl<sub>3</sub>, 101 MHz

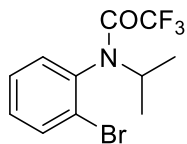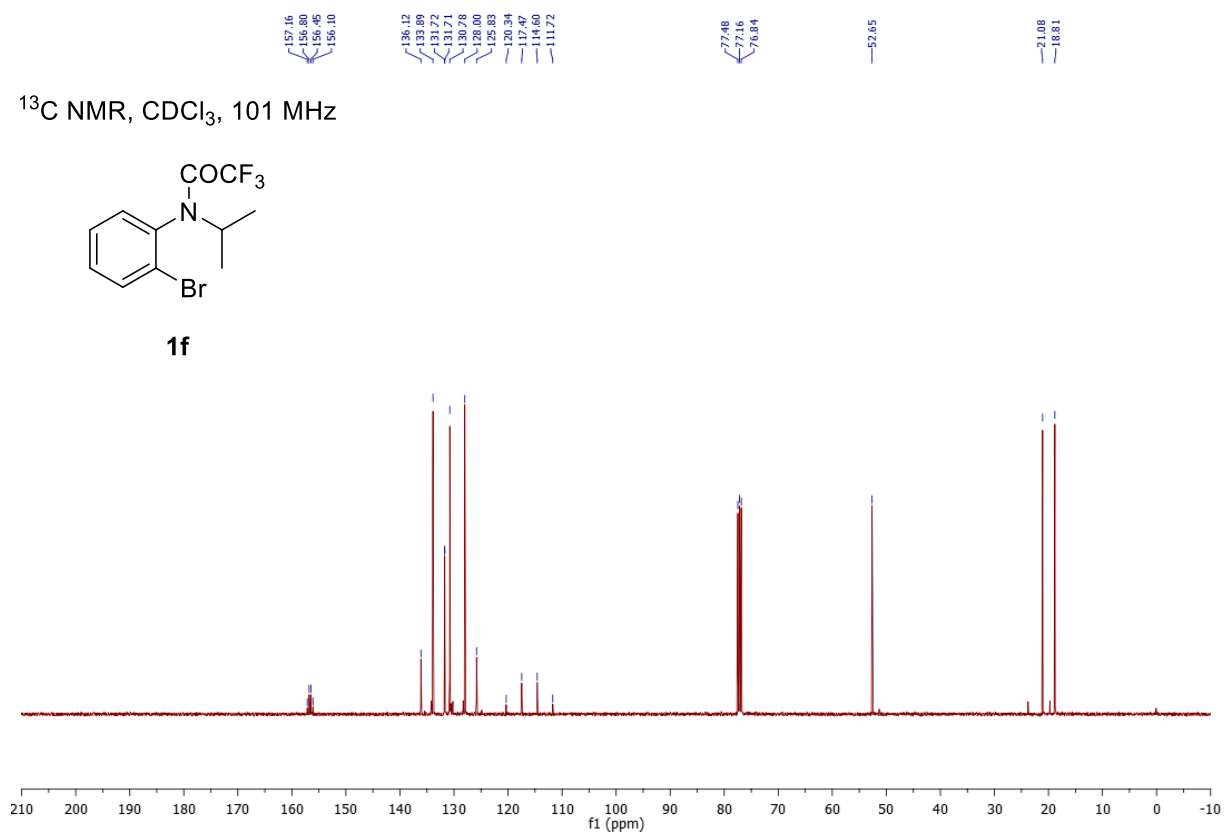

$^{19}\text{F}$  NMR,  $\text{CDCl}_3$ , 376 MHz

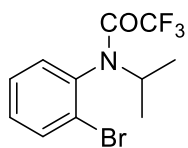

**1f**

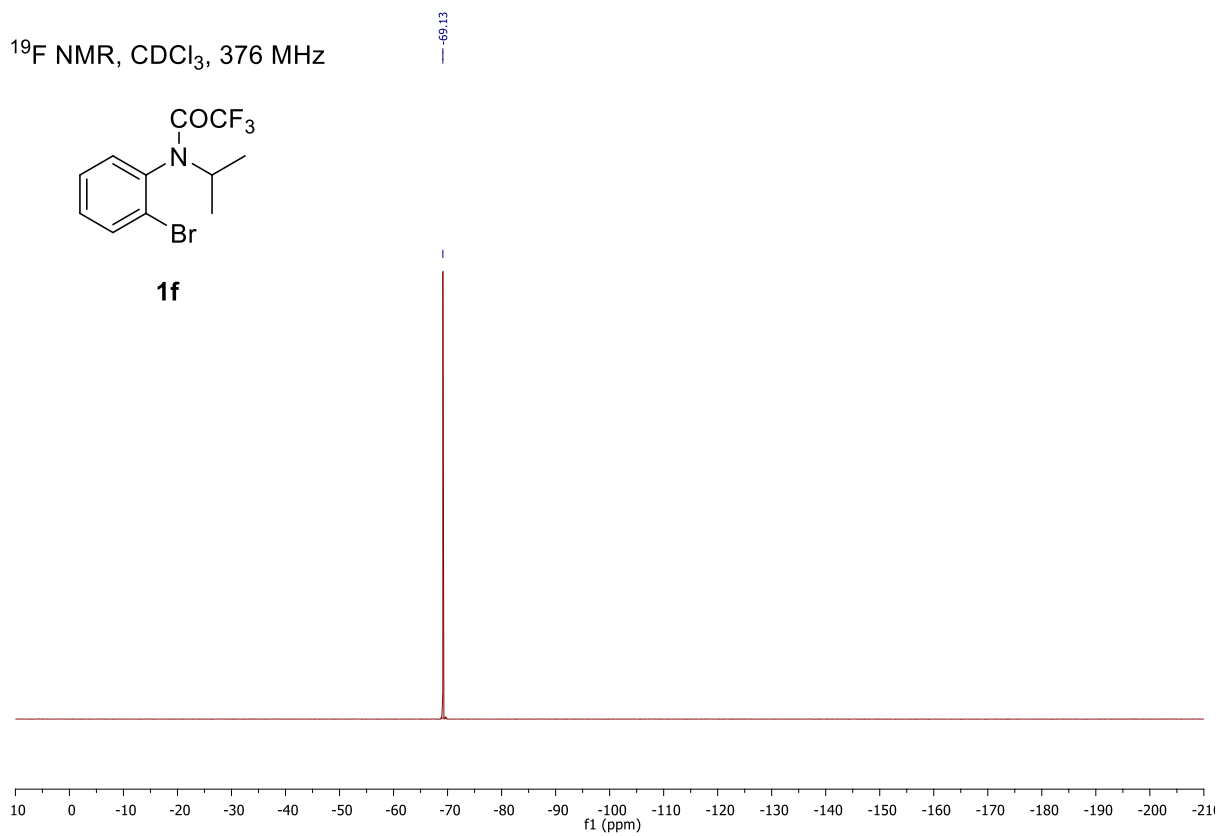

<sup>1</sup>H NMR, CDCl<sub>3</sub>, 400 MHz

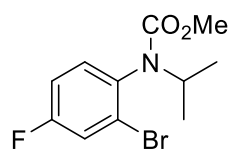

**1h**

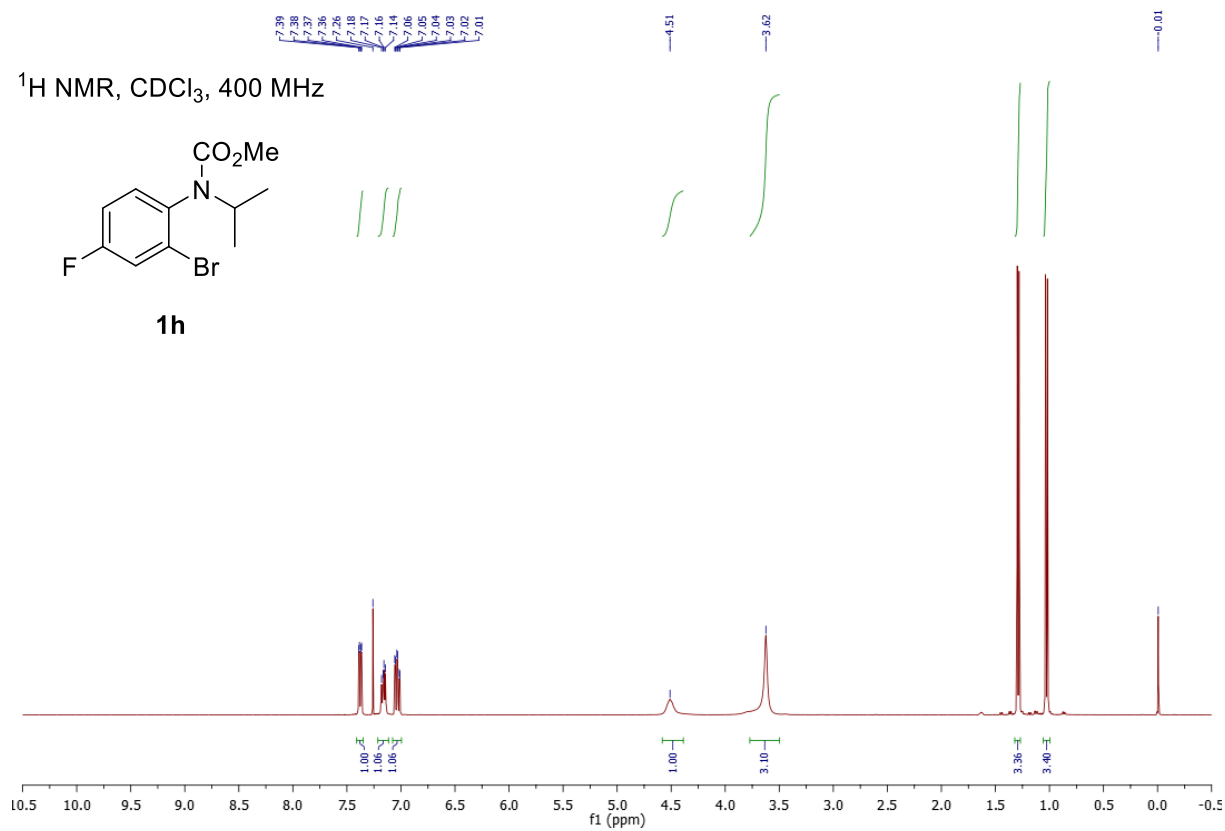

<sup>13</sup>C NMR, CDCl<sub>3</sub>, 101 MHz

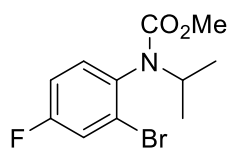

**1h**

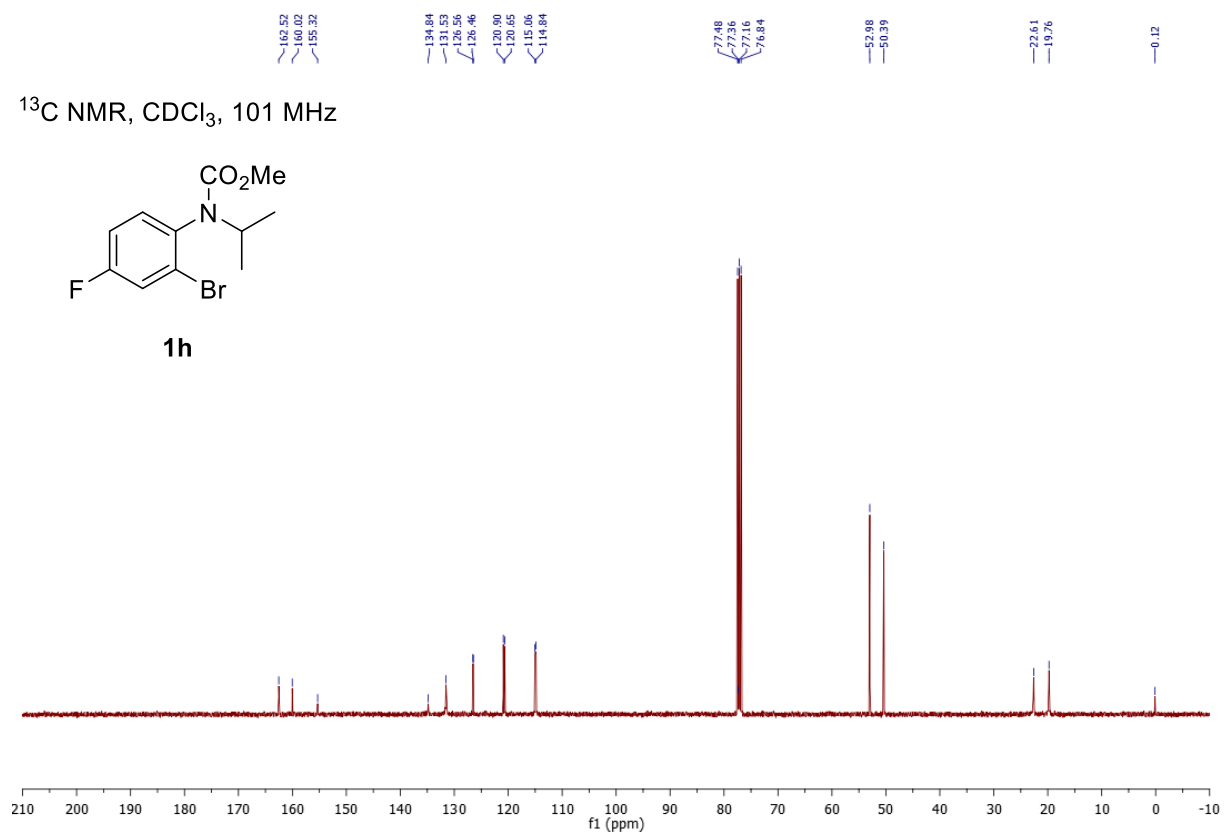

$^{19}\text{F}$  NMR,  $\text{CDCl}_3$ , 376 MHz

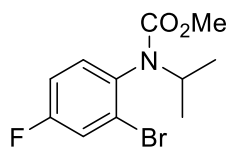

**1h**

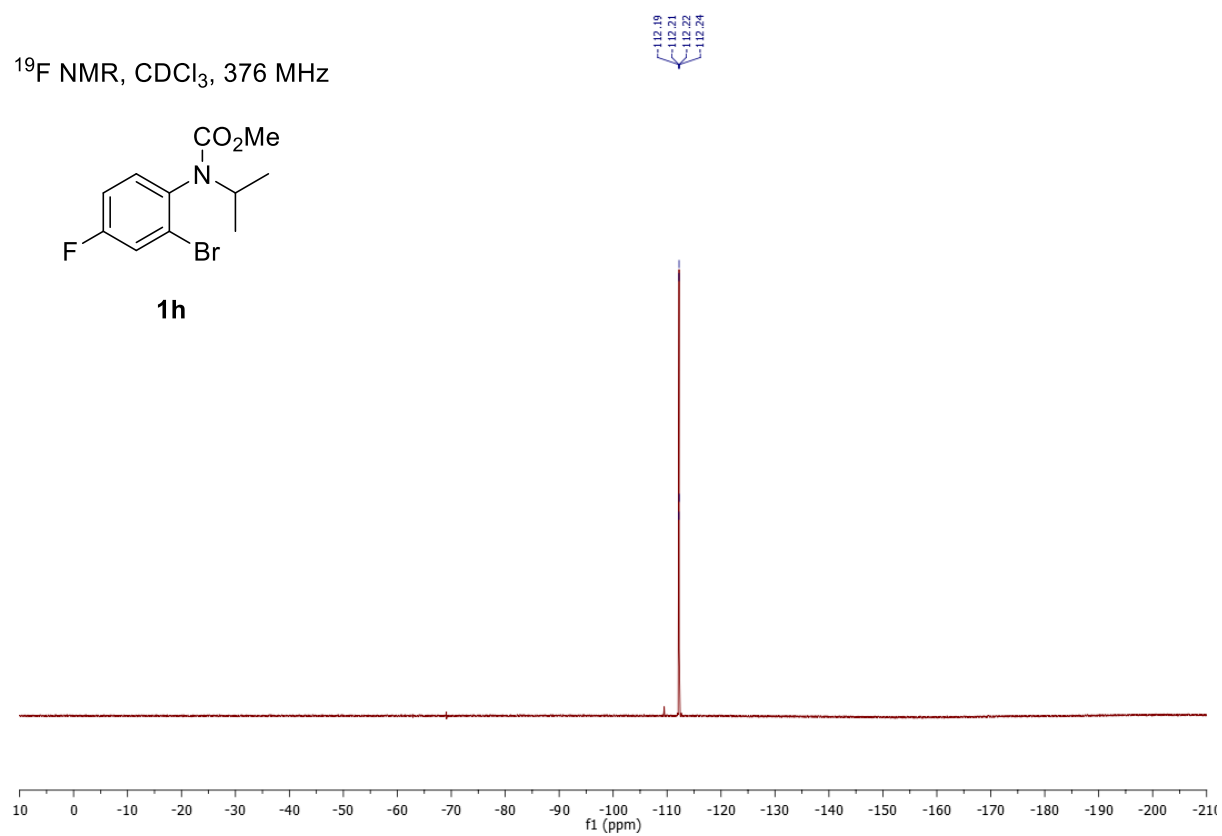

<sup>1</sup>H NMR, CDCl<sub>3</sub>, 400 MHz

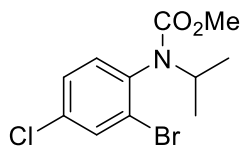

**1i**

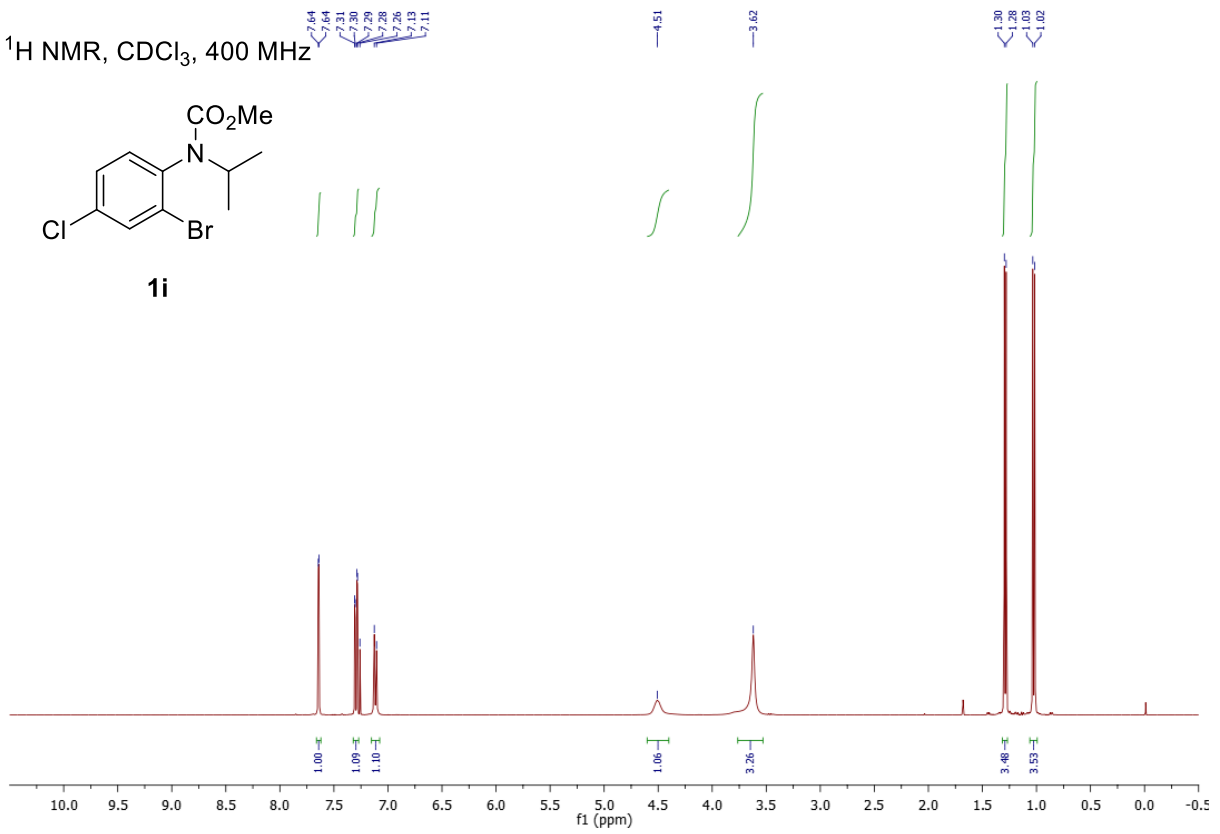

<sup>13</sup>C NMR, CDCl<sub>3</sub>, 101 MHz

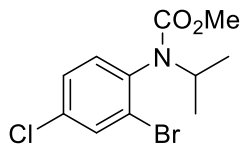

**1i**

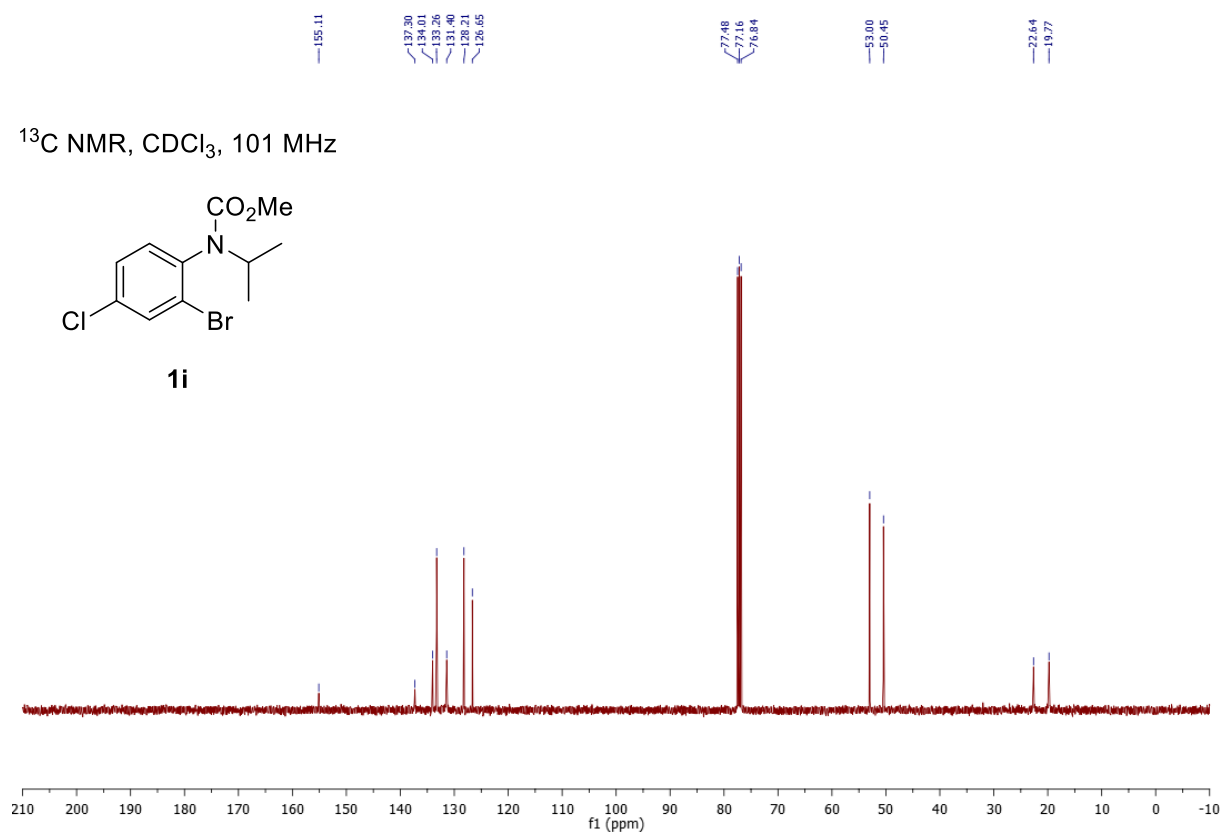



<sup>1</sup>H NMR, CDCl<sub>3</sub>, 400 MHz

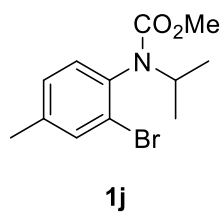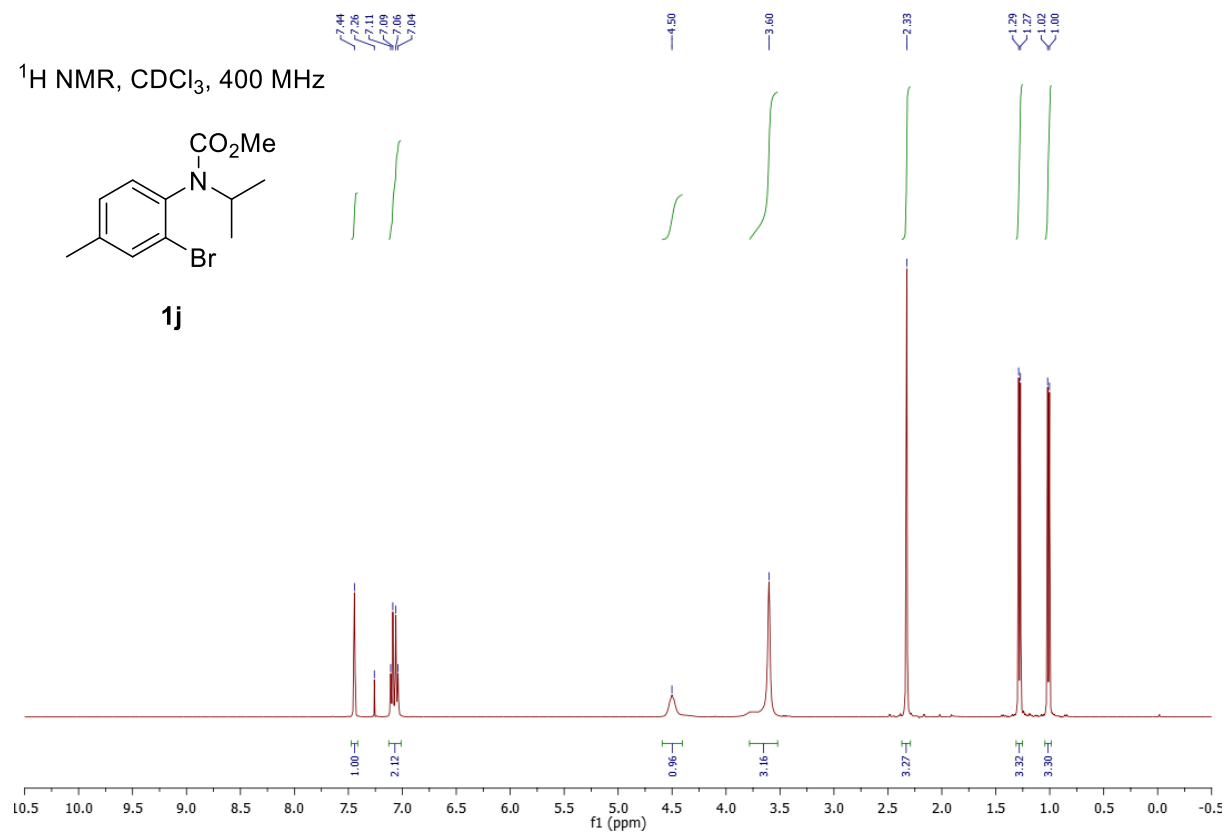

<sup>13</sup>C NMR, CDCl<sub>3</sub>, 101 MHz

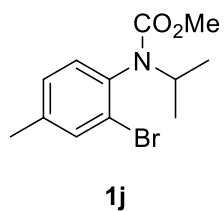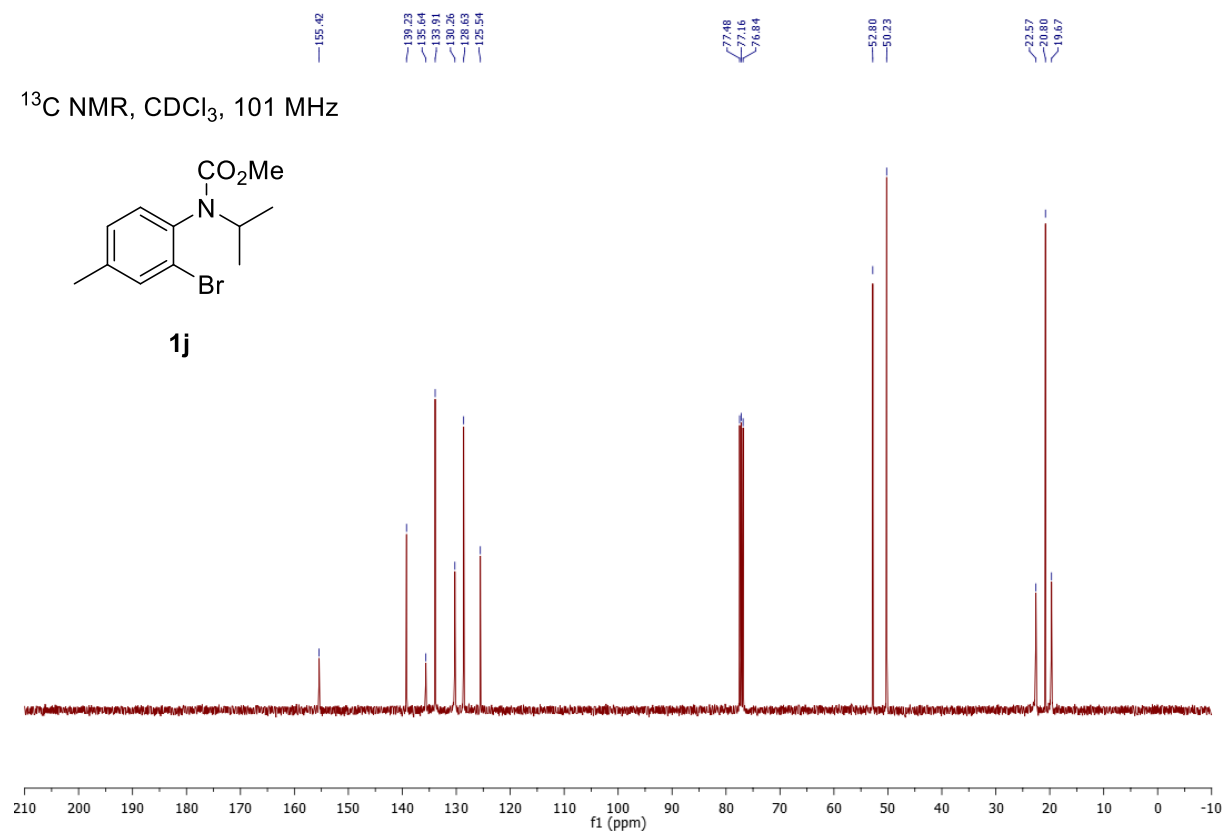

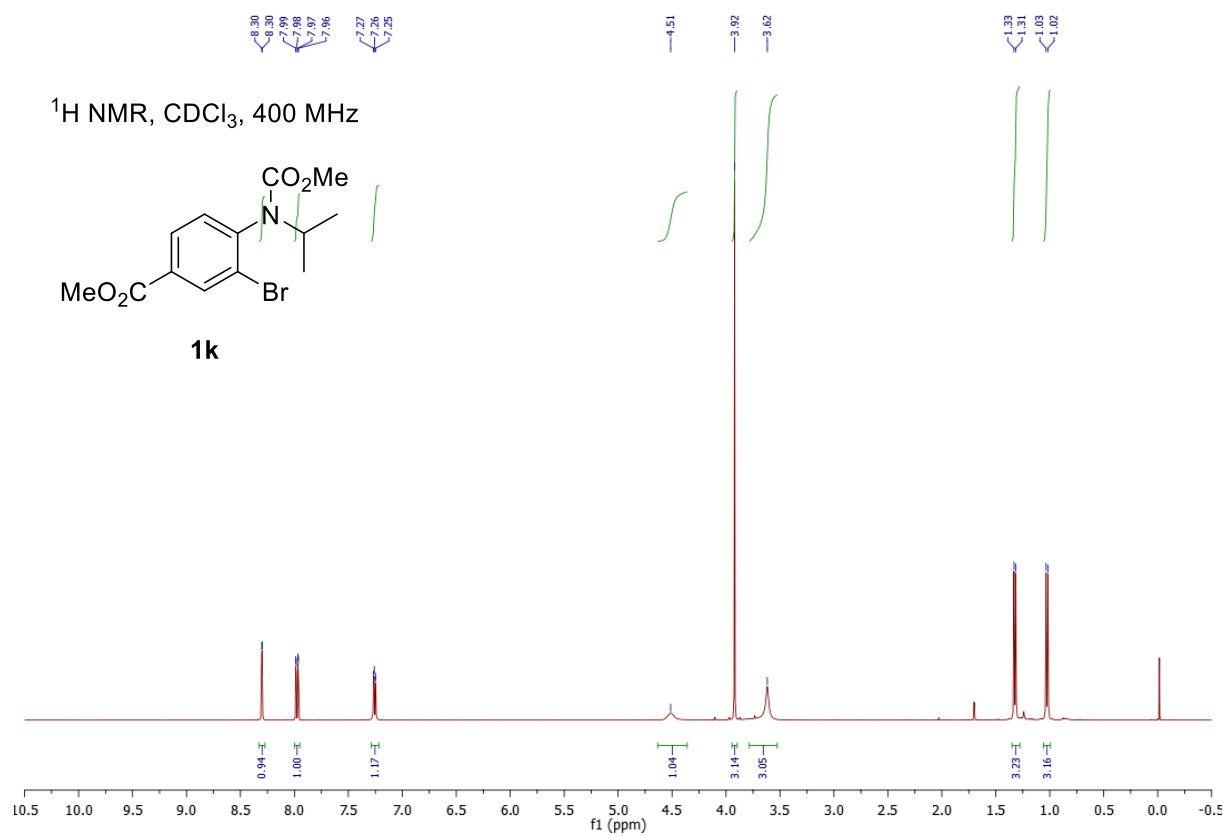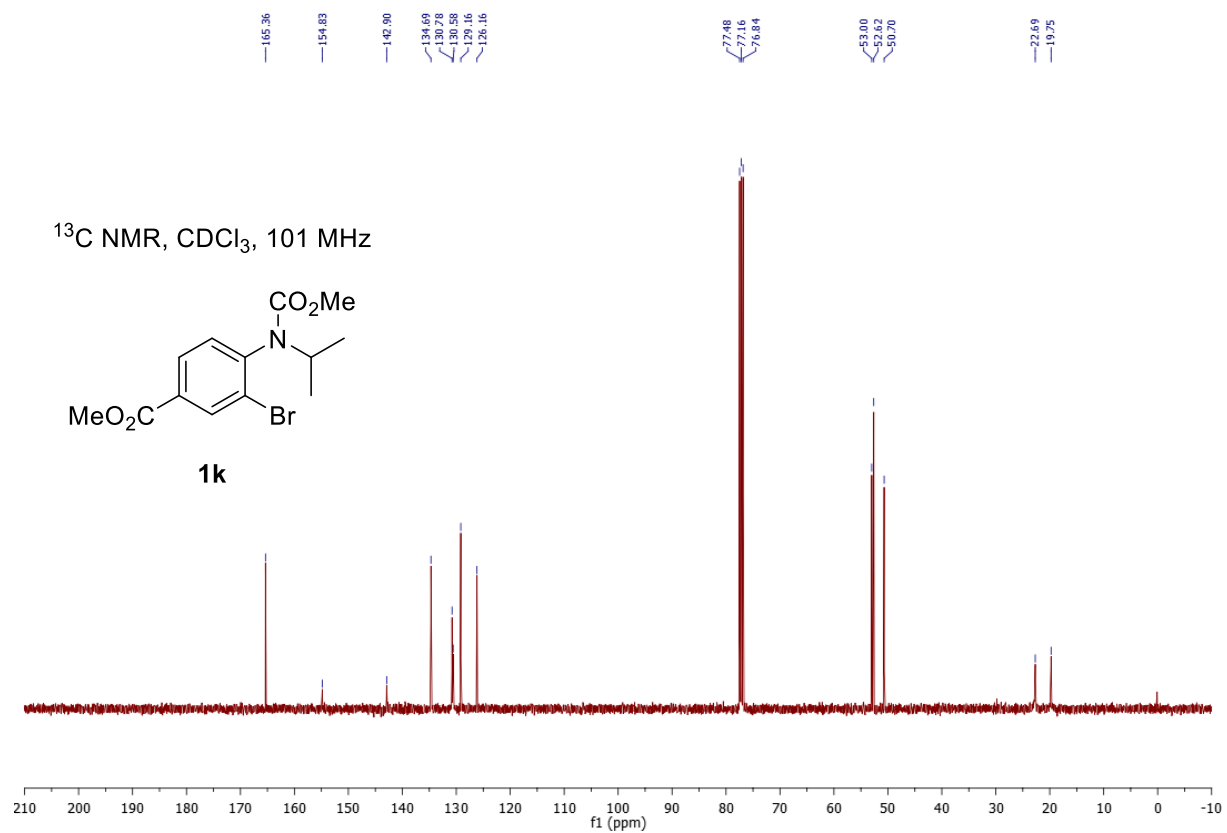

<sup>1</sup>H NMR, CDCl<sub>3</sub>, 400 MHz

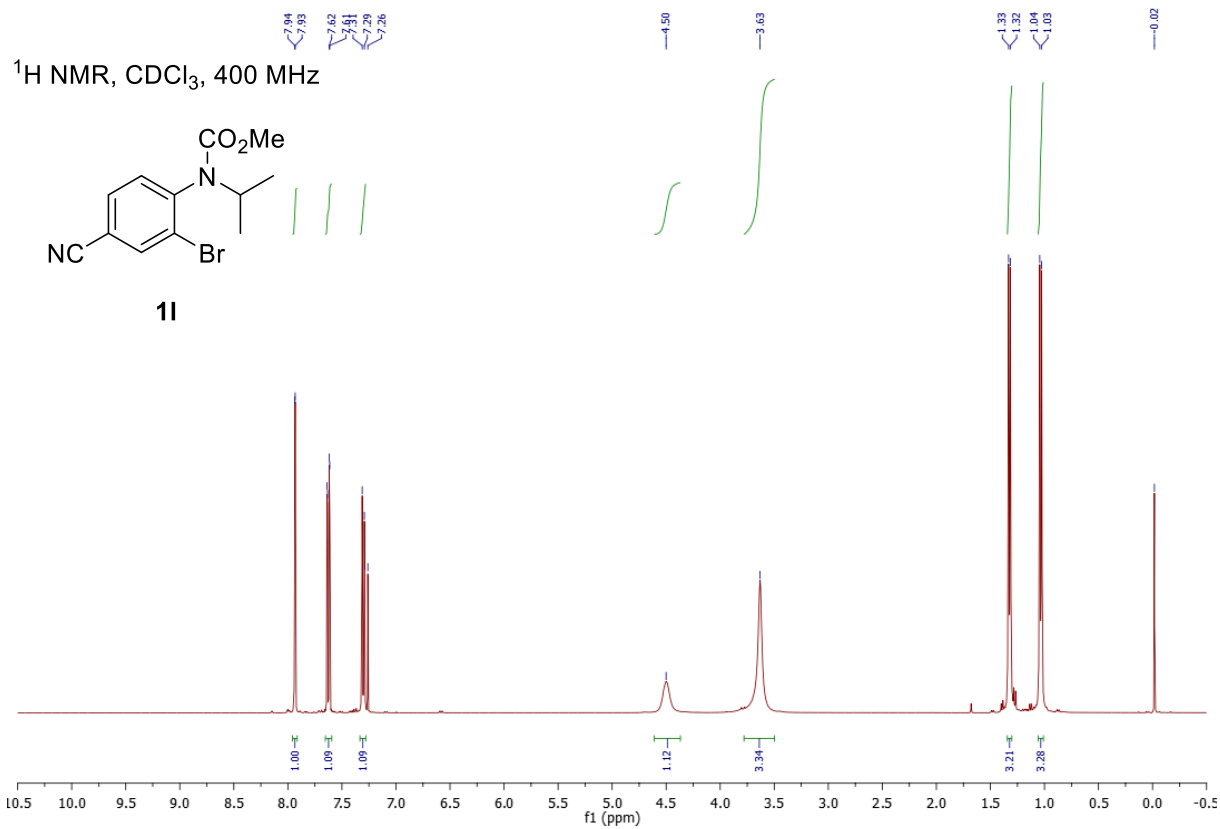

<sup>13</sup>C NMR, CDCl<sub>3</sub>, 101 MHz

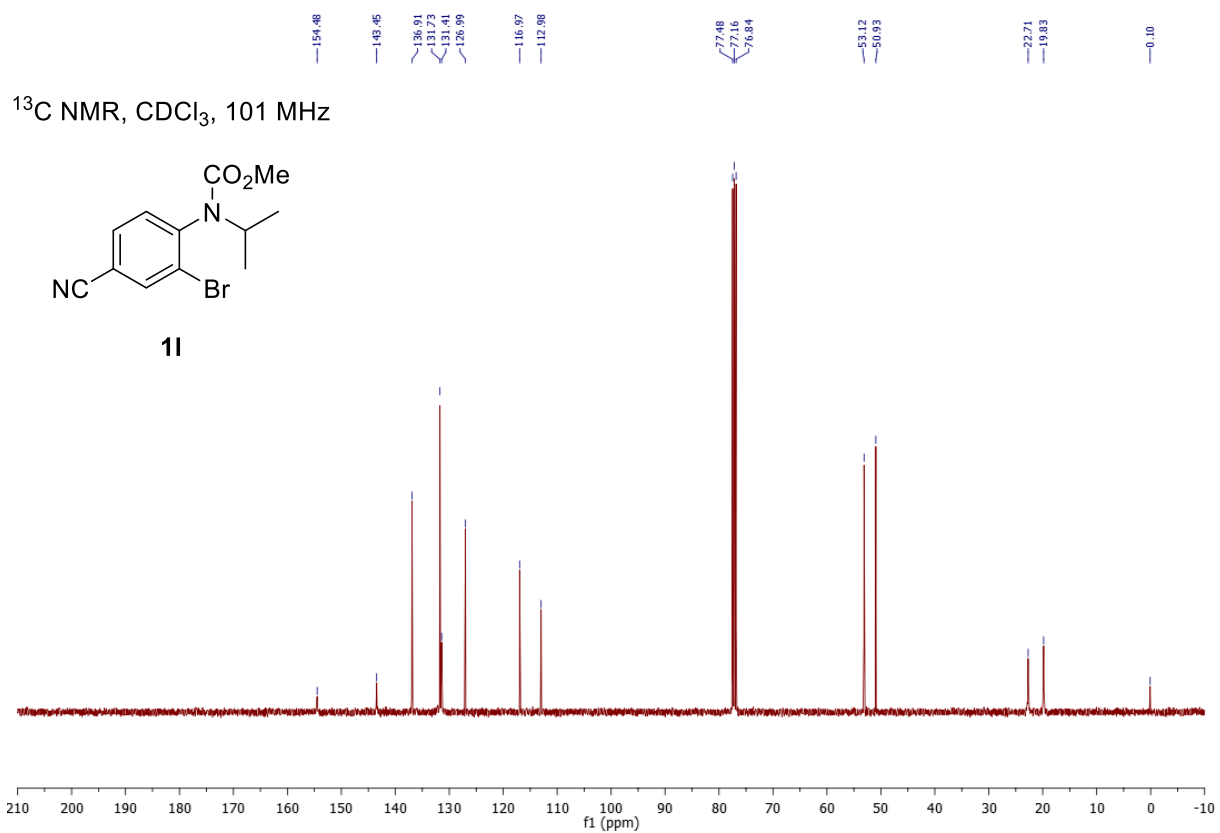

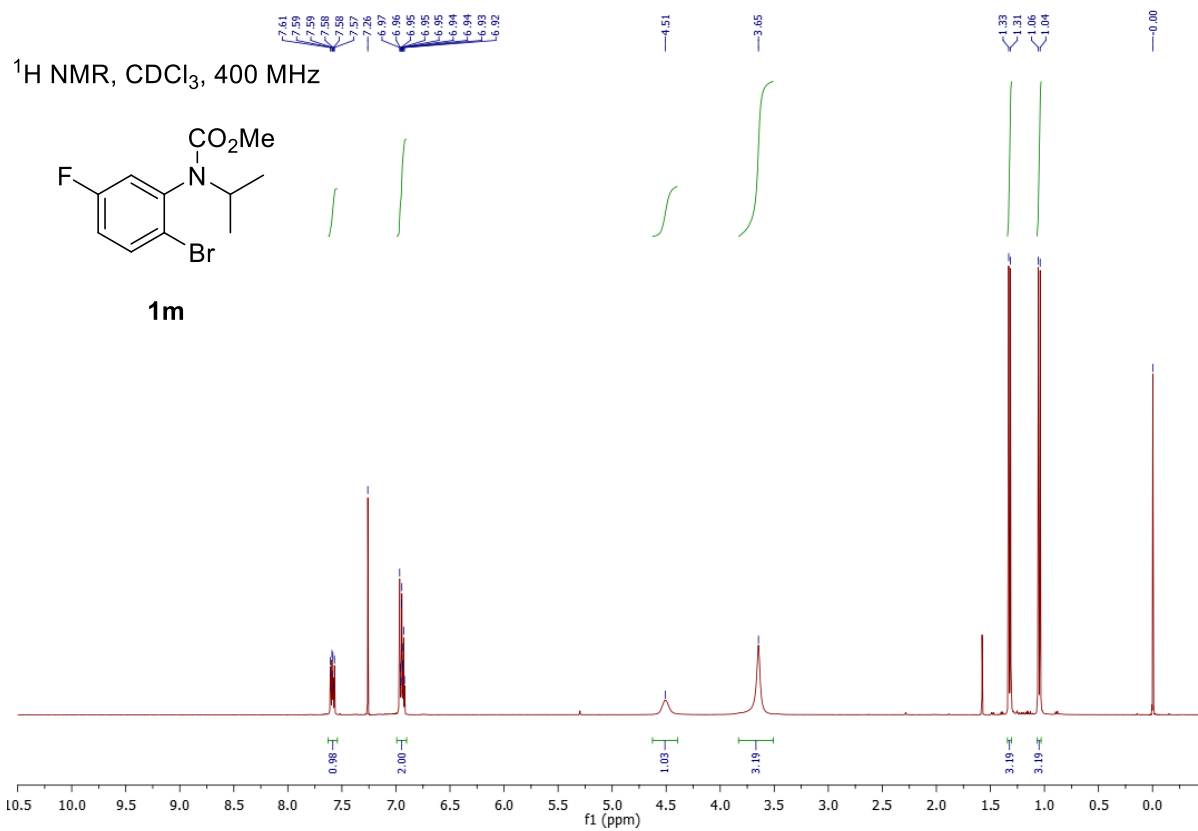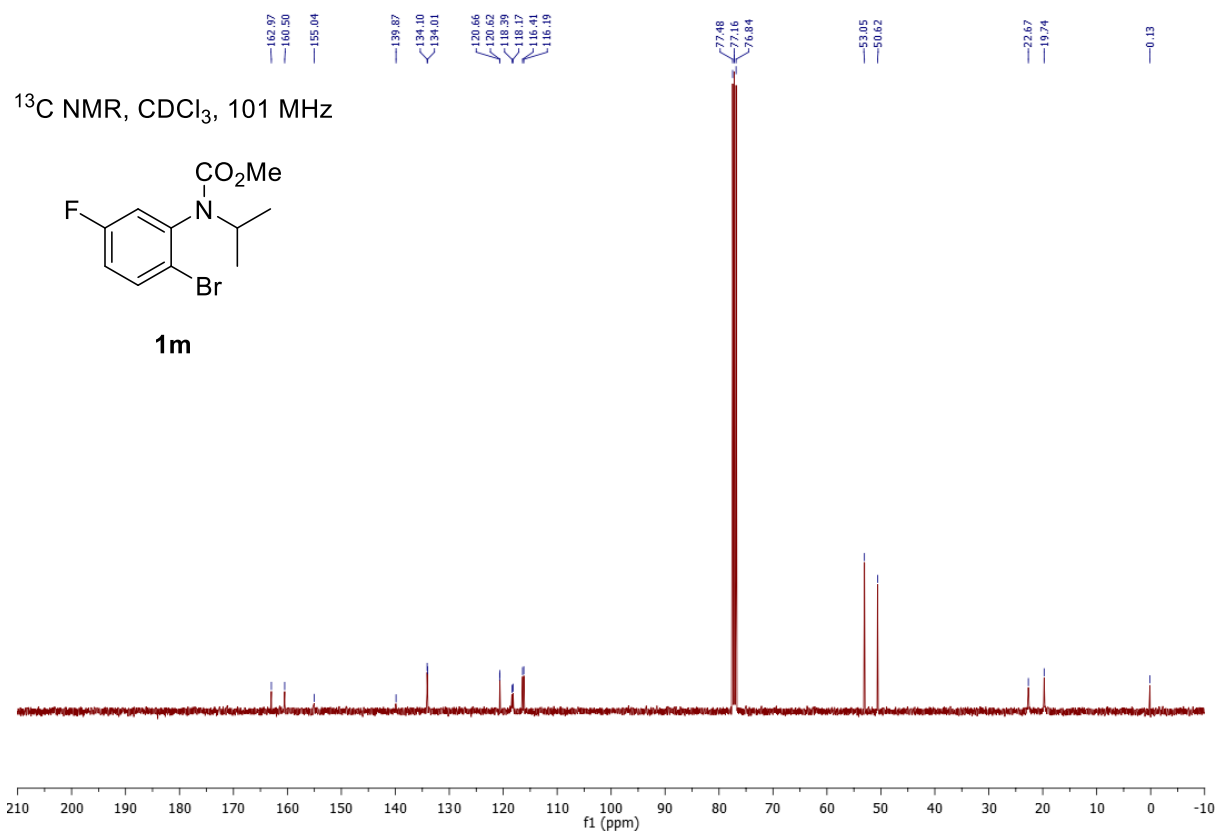

$^{19}\text{F}$  NMR,  $\text{CDCl}_3$ , 376 MHz

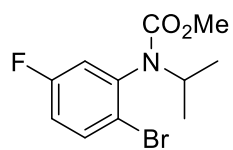

**1m**

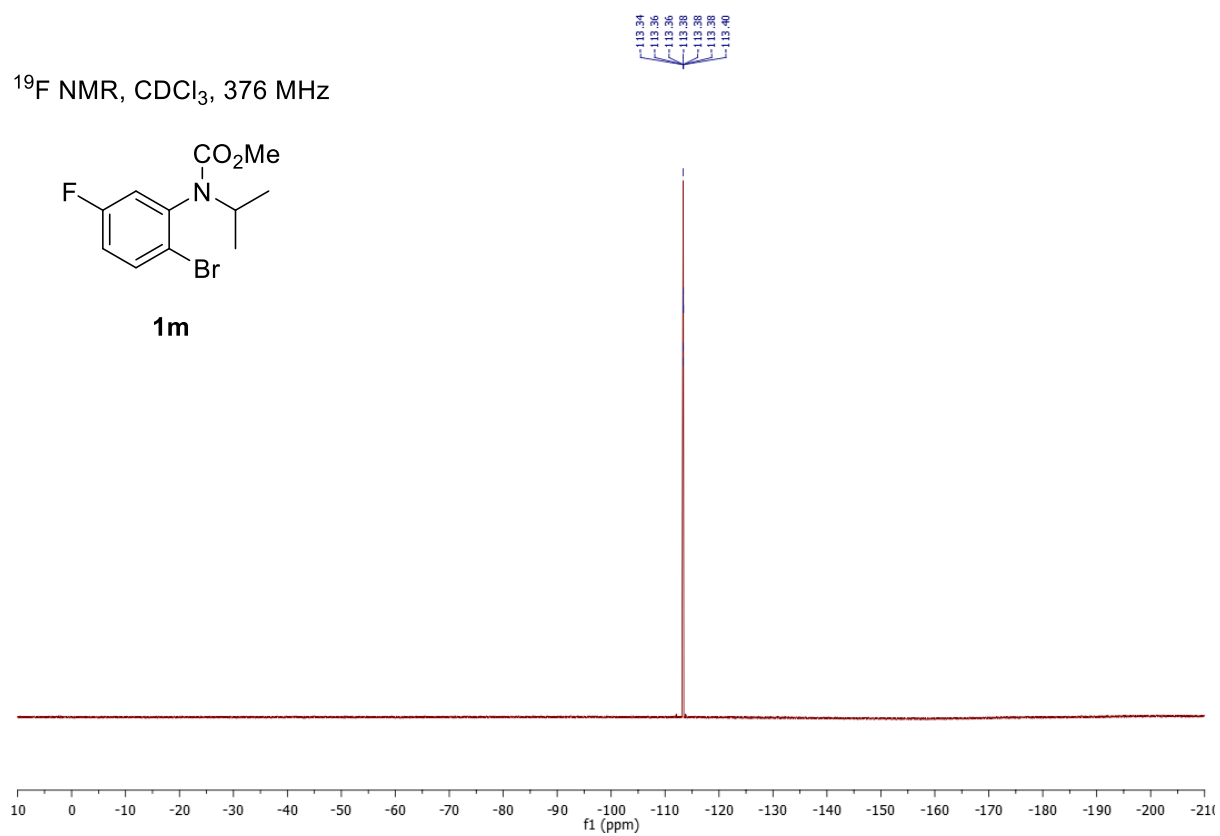

<sup>1</sup>H NMR, CDCl<sub>3</sub>, 400 MHz

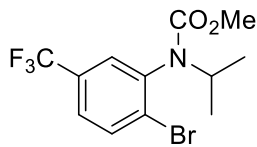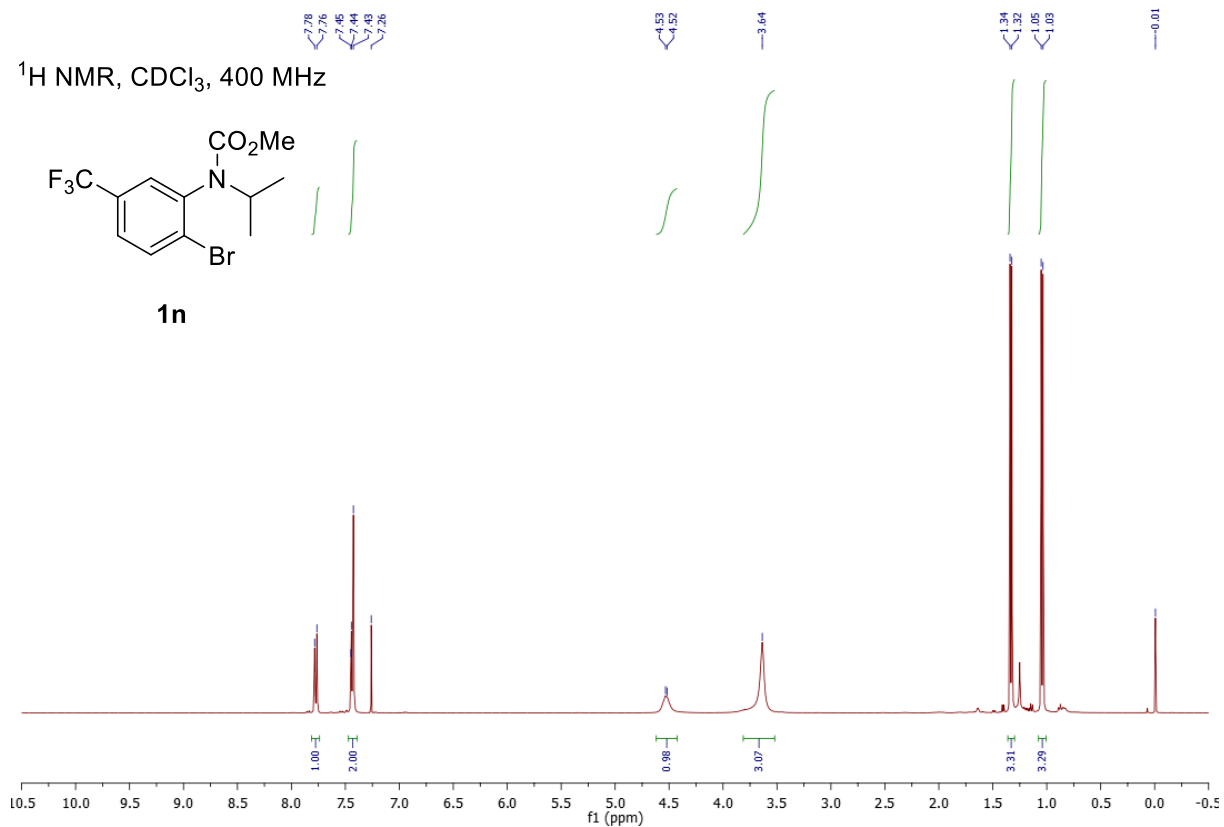

<sup>13</sup>C NMR, CDCl<sub>3</sub>, 101 MHz

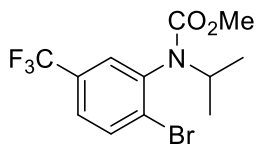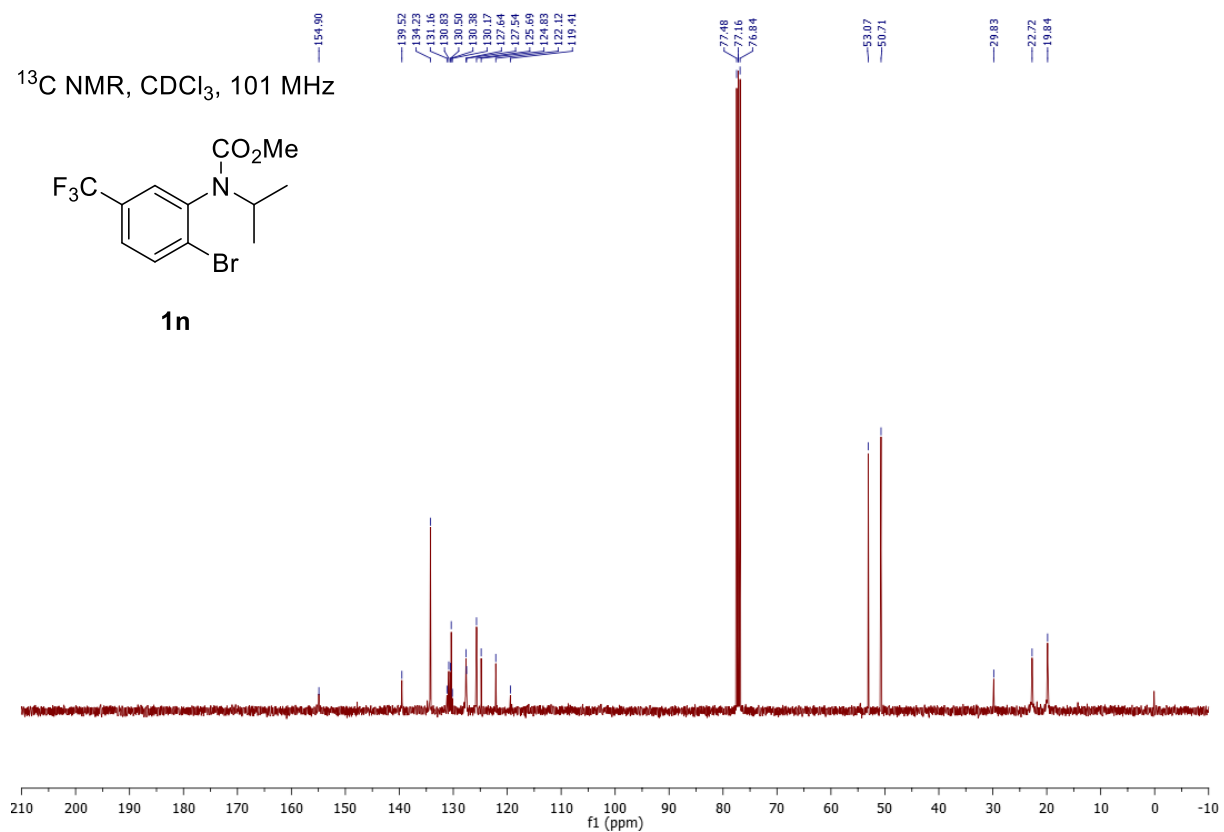

$^{19}\text{F}$  NMR,  $\text{CDCl}_3$ , 376 MHz

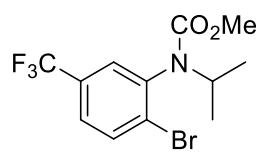

**1n**

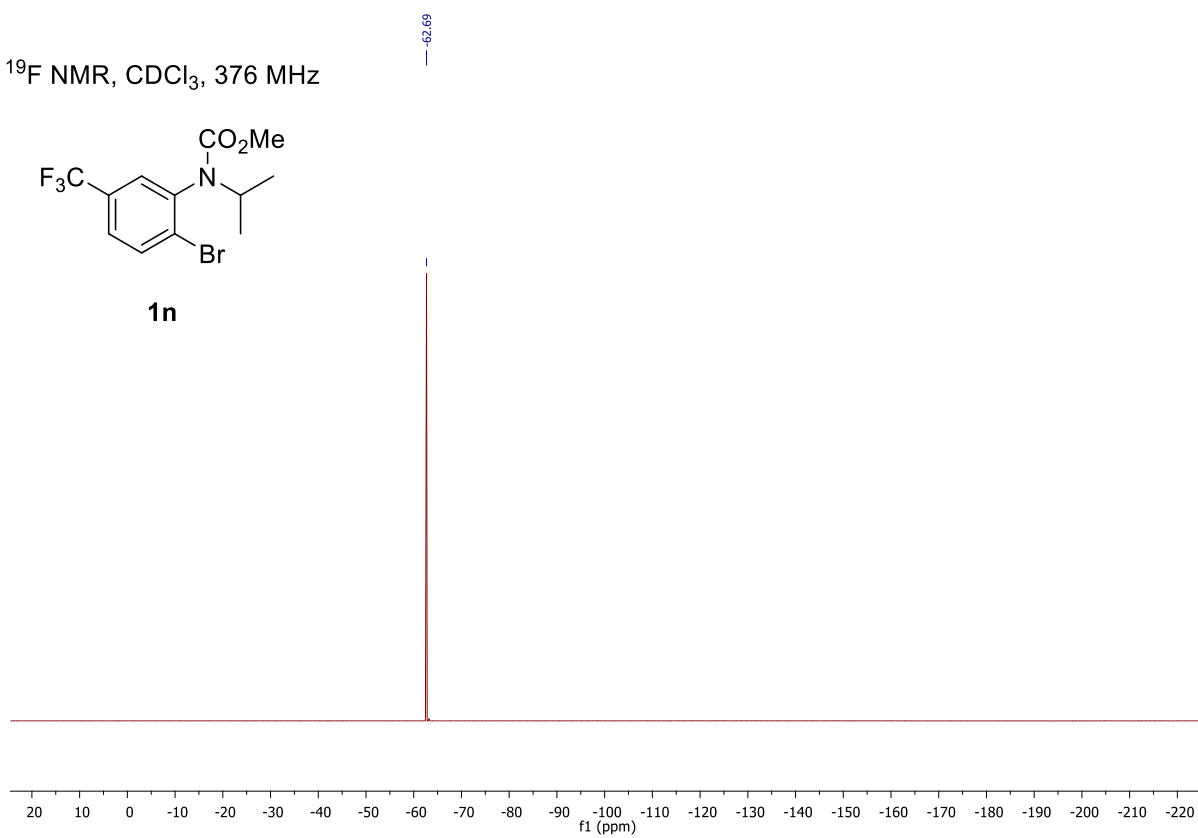

<sup>1</sup>H NMR, CDCl<sub>3</sub>, 400 MHz

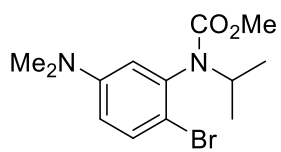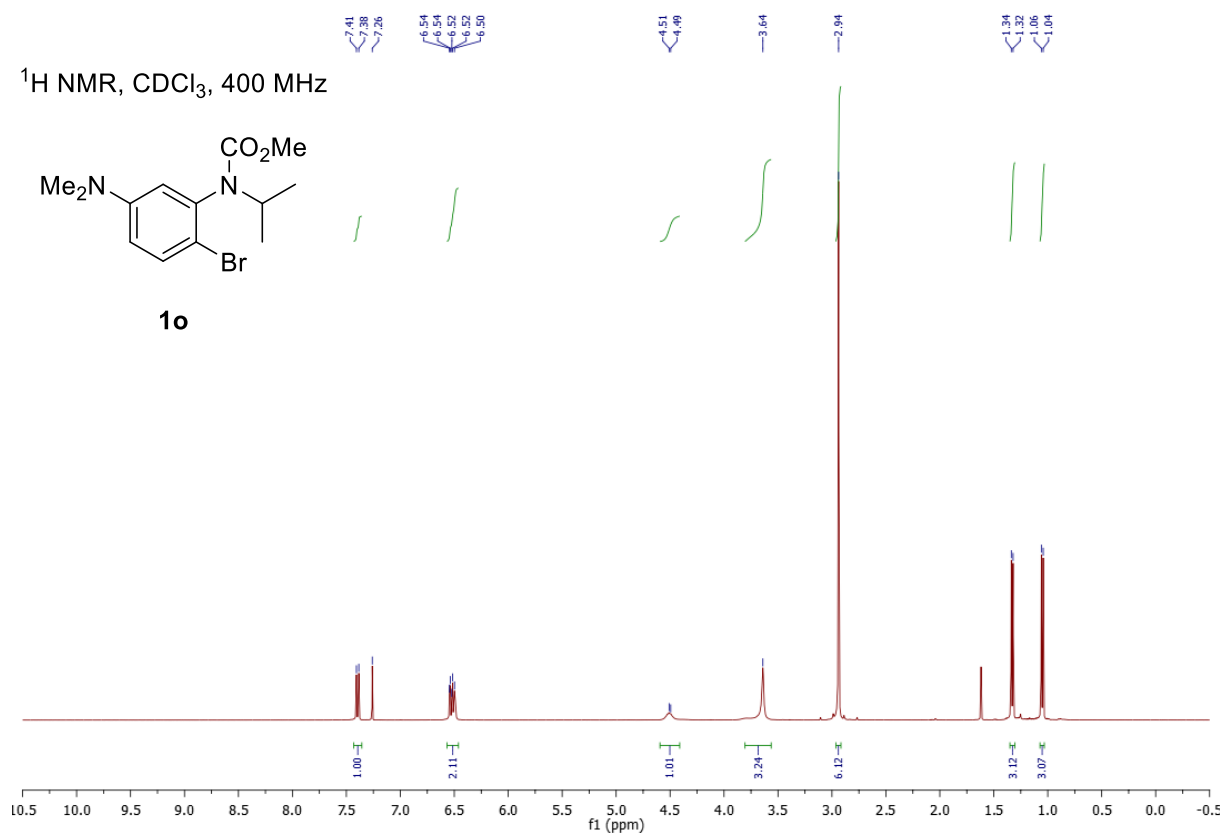



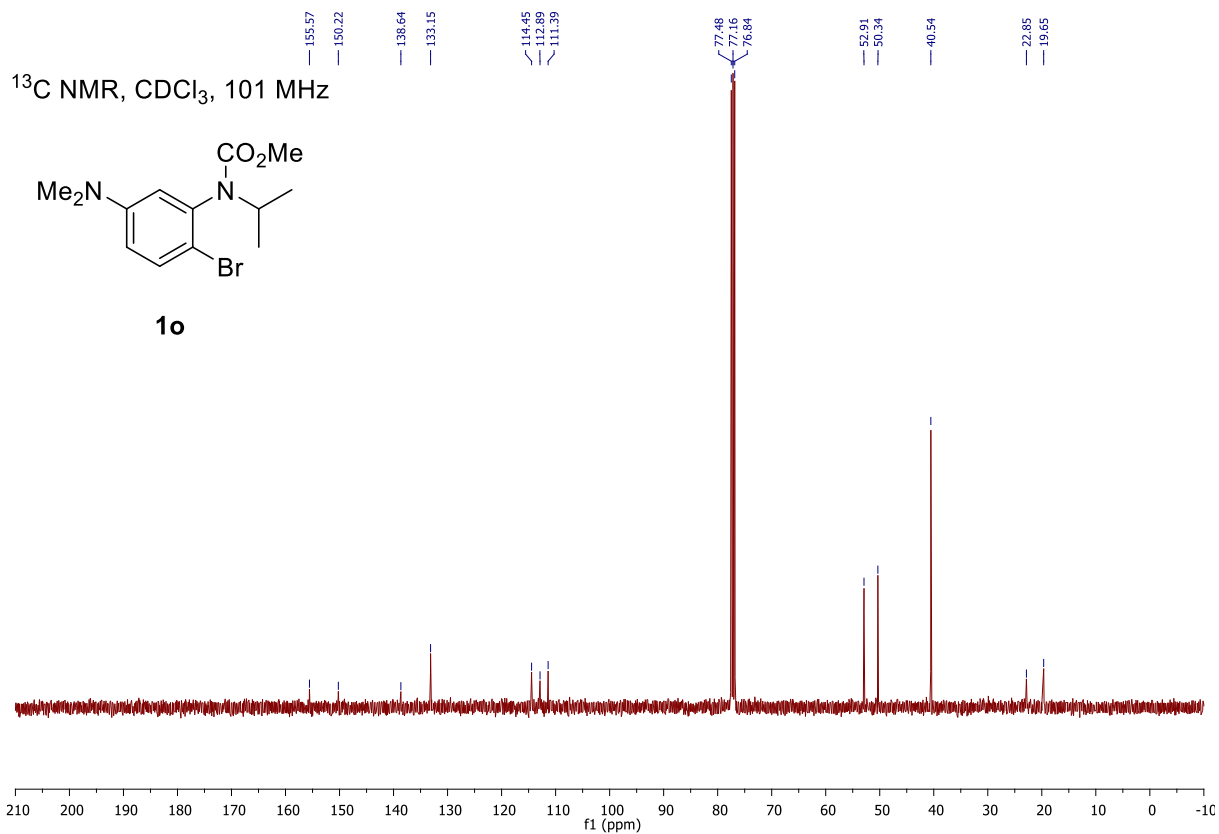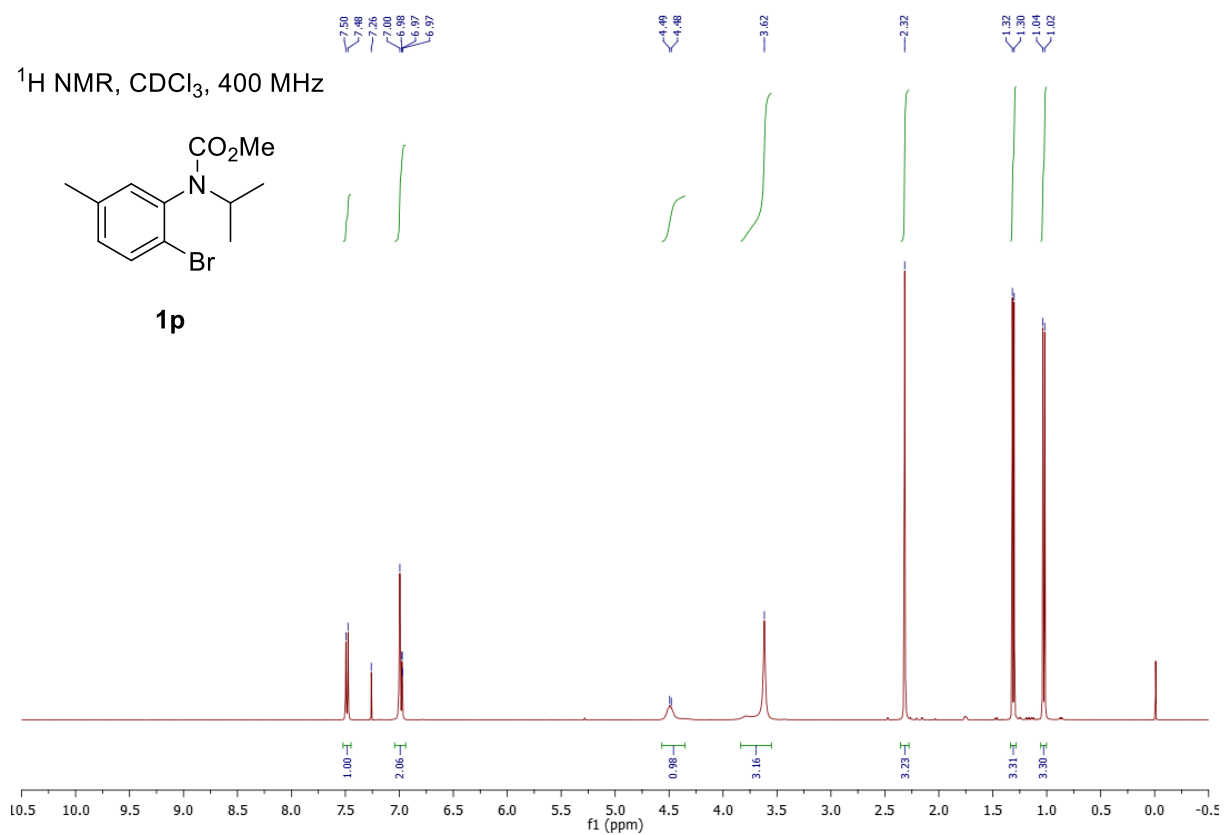

$^{13}\text{C}$  NMR,  $\text{CDCl}_3$ , 101 MHz

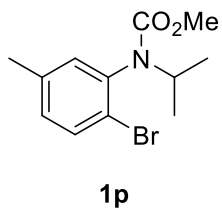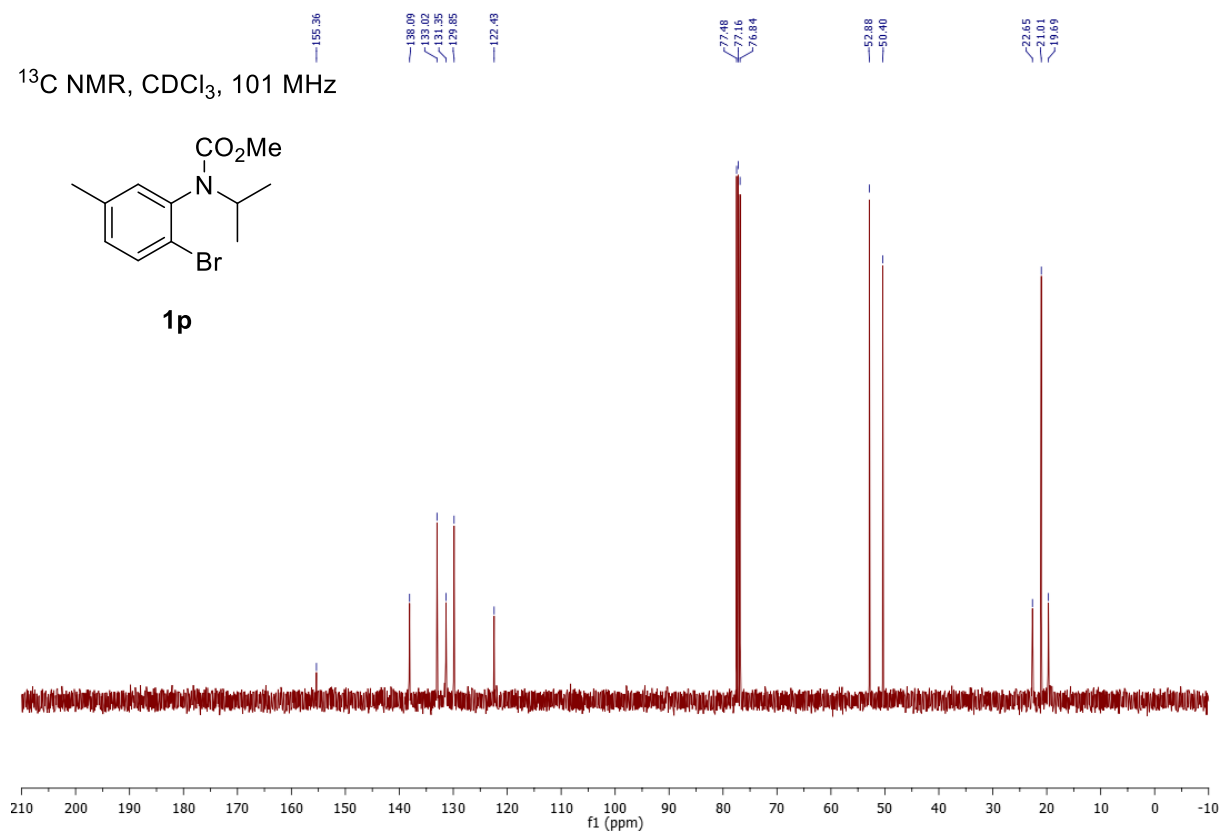

$^1\text{H}$  NMR,  $\text{CDCl}_3$ , 400 MHz

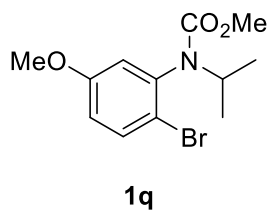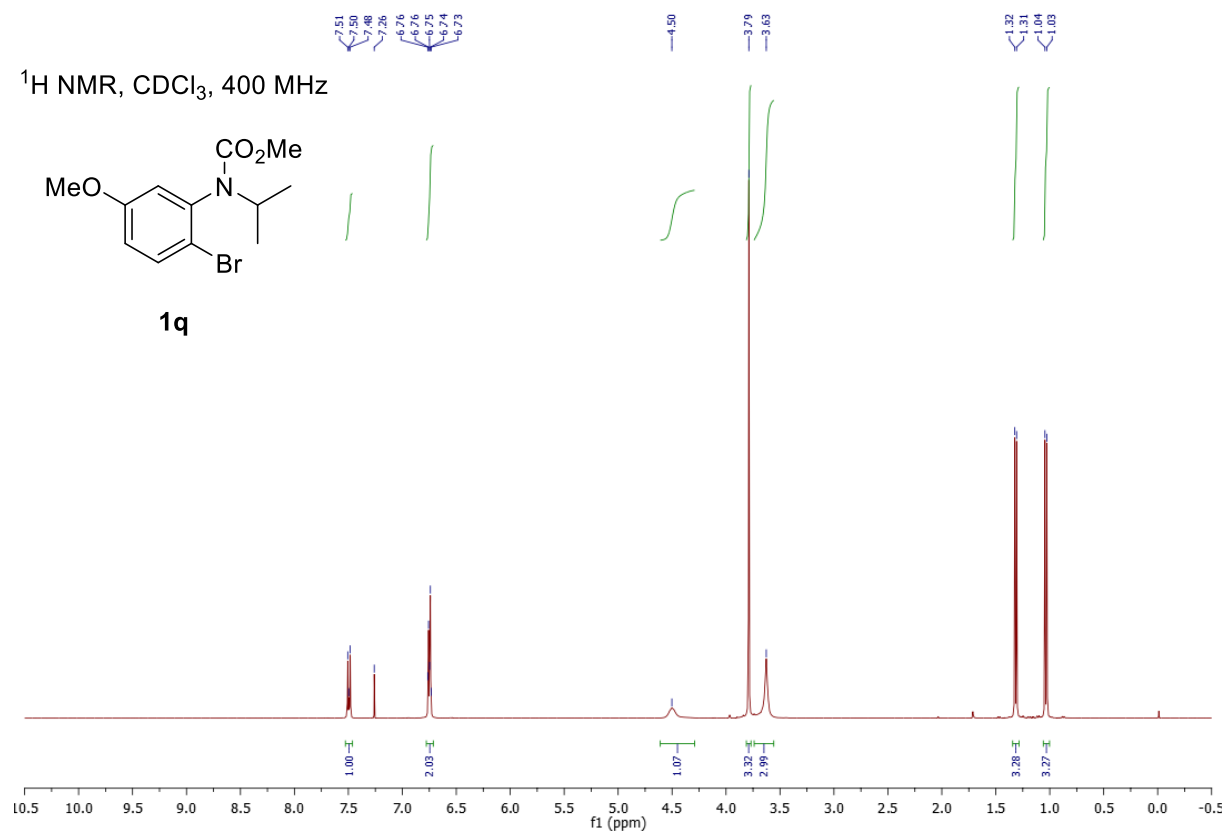

$^{13}\text{C}$  NMR,  $\text{CDCl}_3$ , 101 MHz

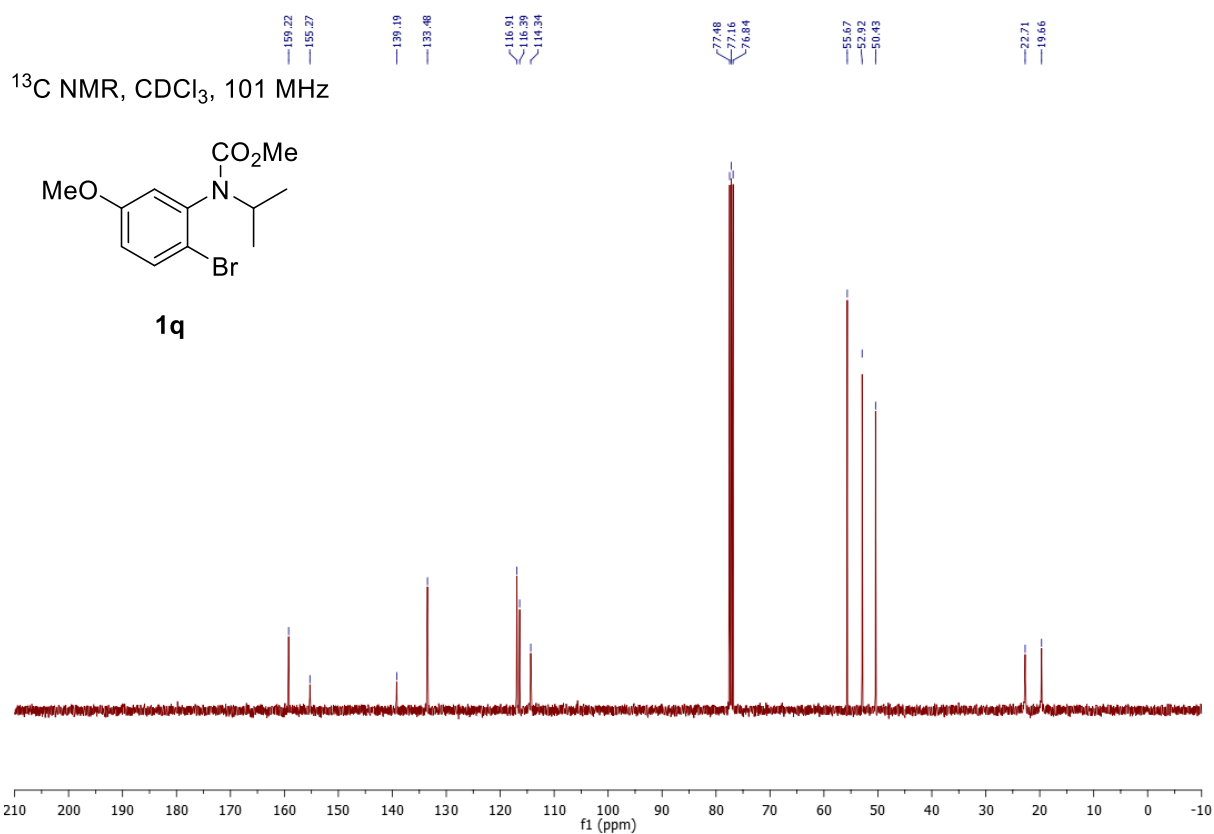

$^1\text{H}$  NMR,  $\text{CDCl}_3$ , 400 MHz

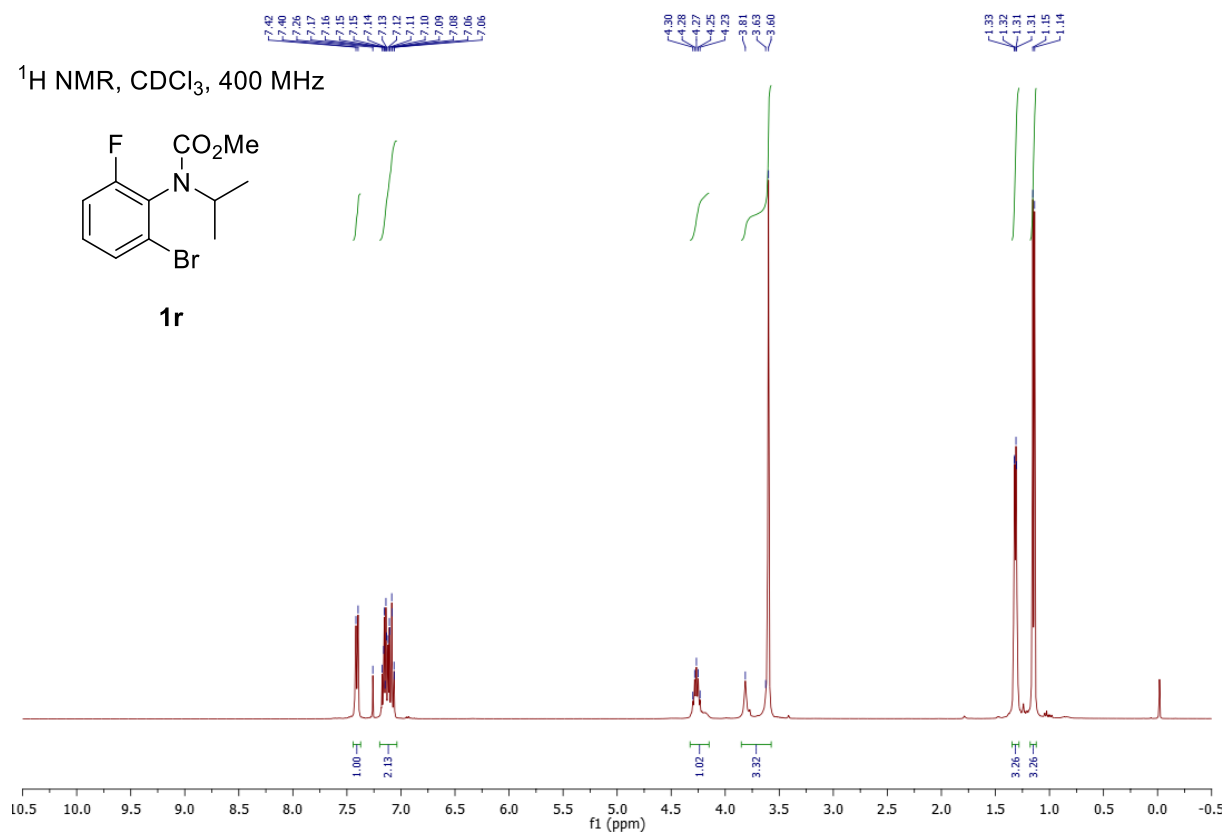

$^{13}\text{C}$  NMR,  $\text{CDCl}_3$ , 101 MHz

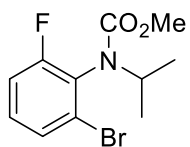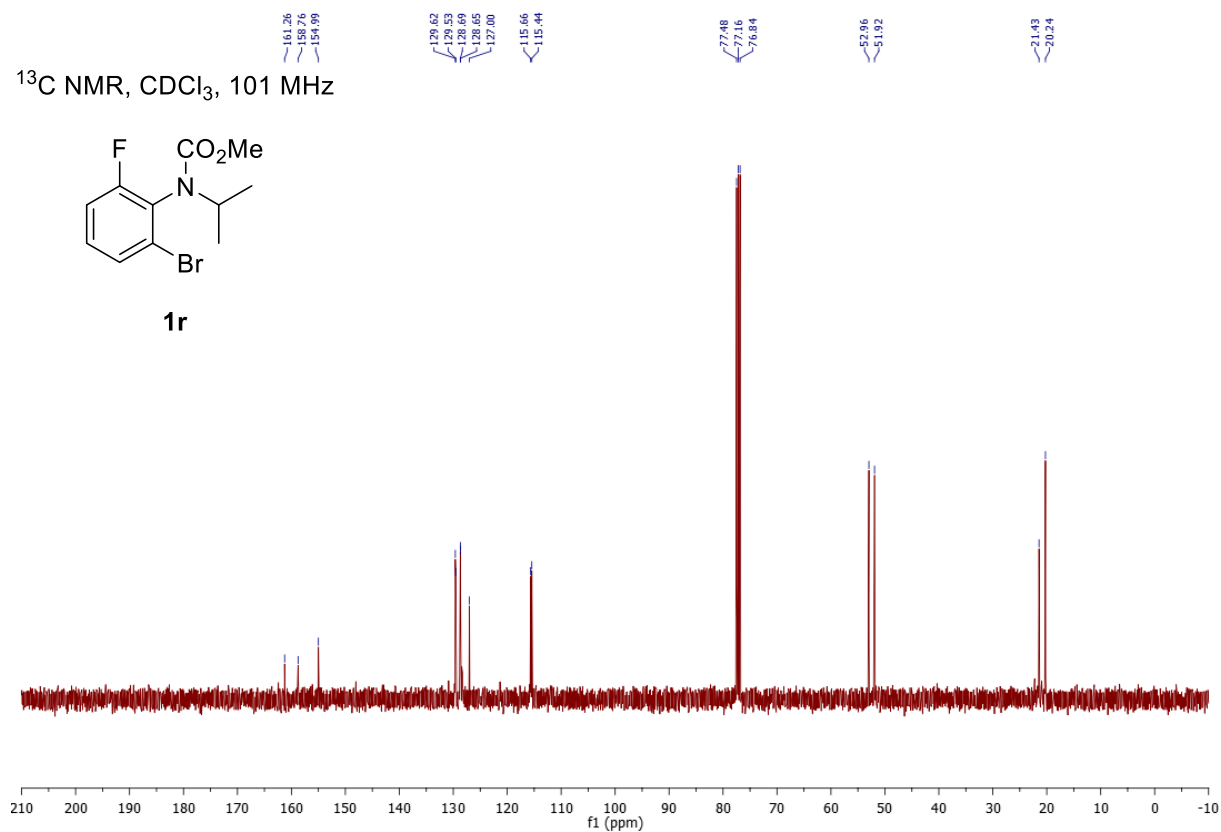

$^{19}\text{F}$  NMR,  $\text{CDCl}_3$ , 376 MHz

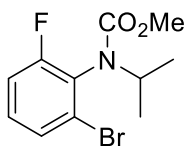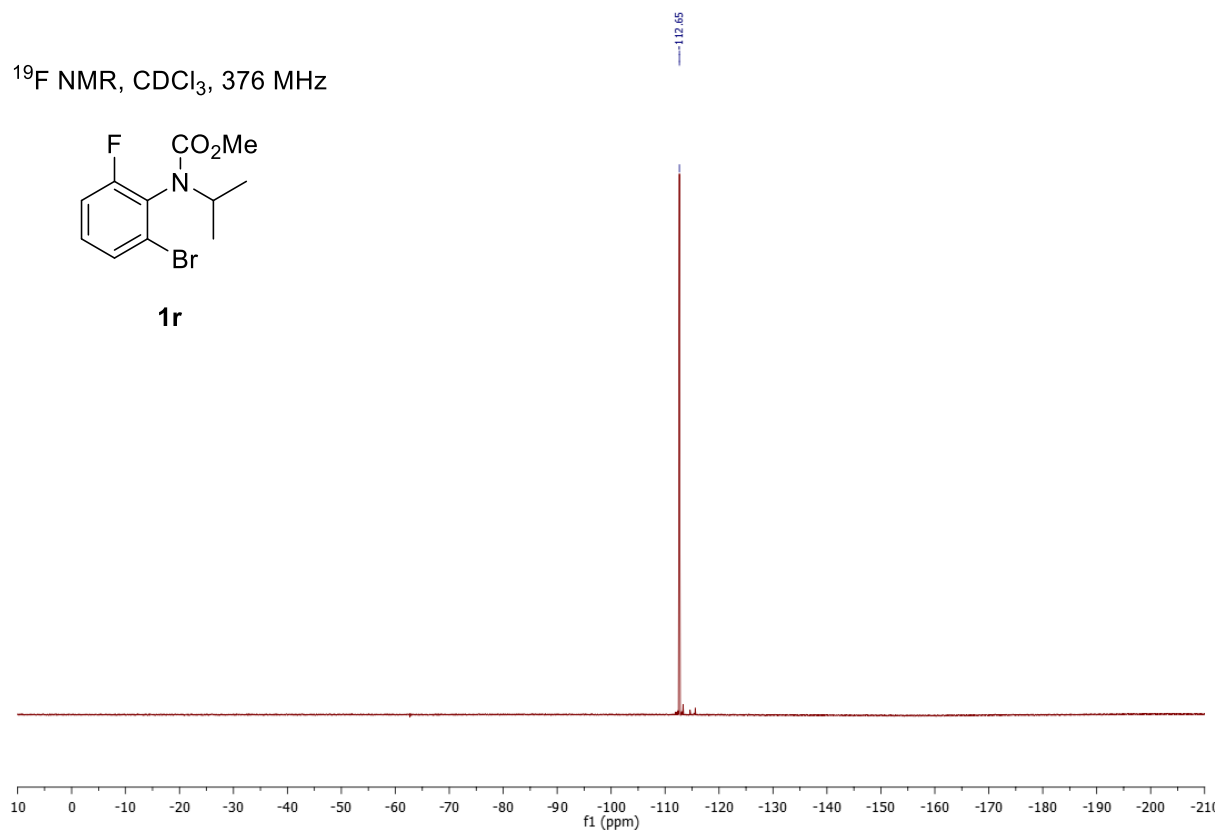

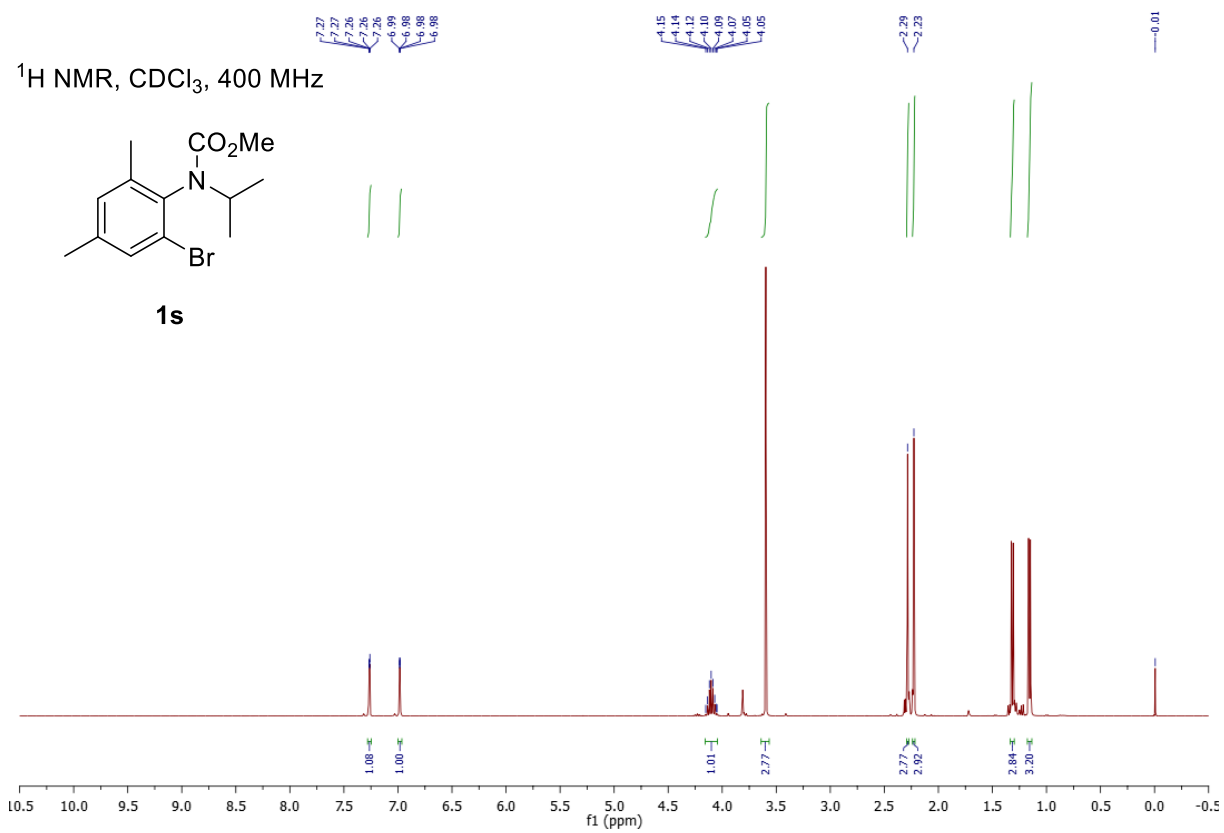

$^{13}\text{C}$  NMR,  $\text{CDCl}_3$ , 101 MHz

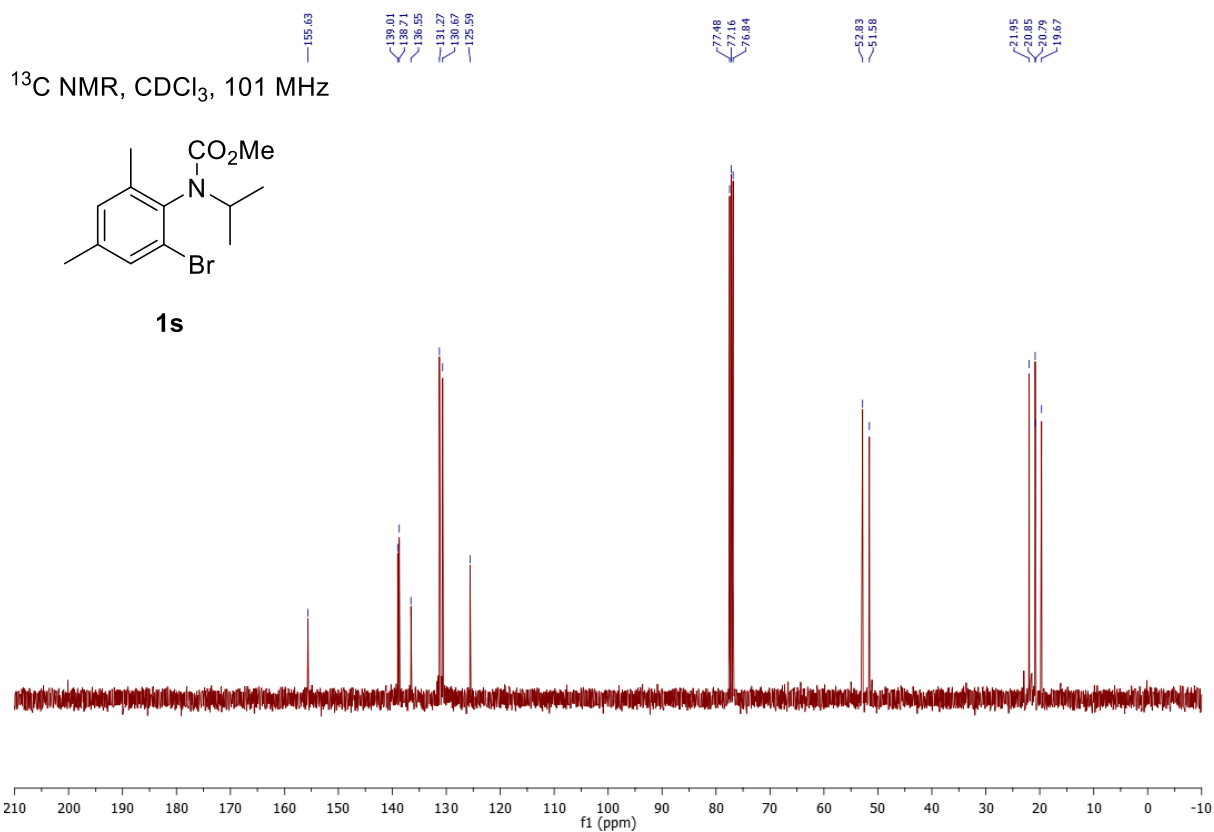

$^1\text{H}$  NMR,  $\text{CDCl}_3$ , 400 MHz

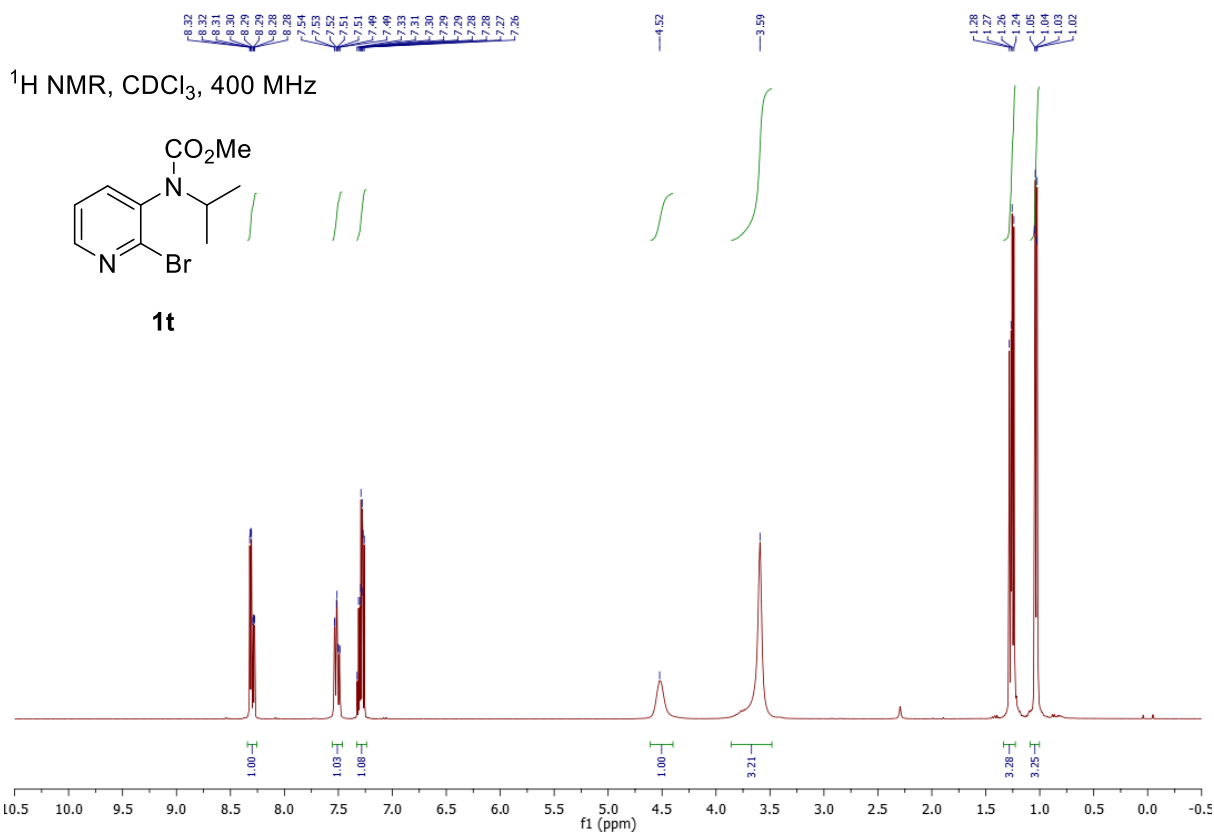

$^{13}\text{C}$  NMR,  $\text{CDCl}_3$ , 101 MHz

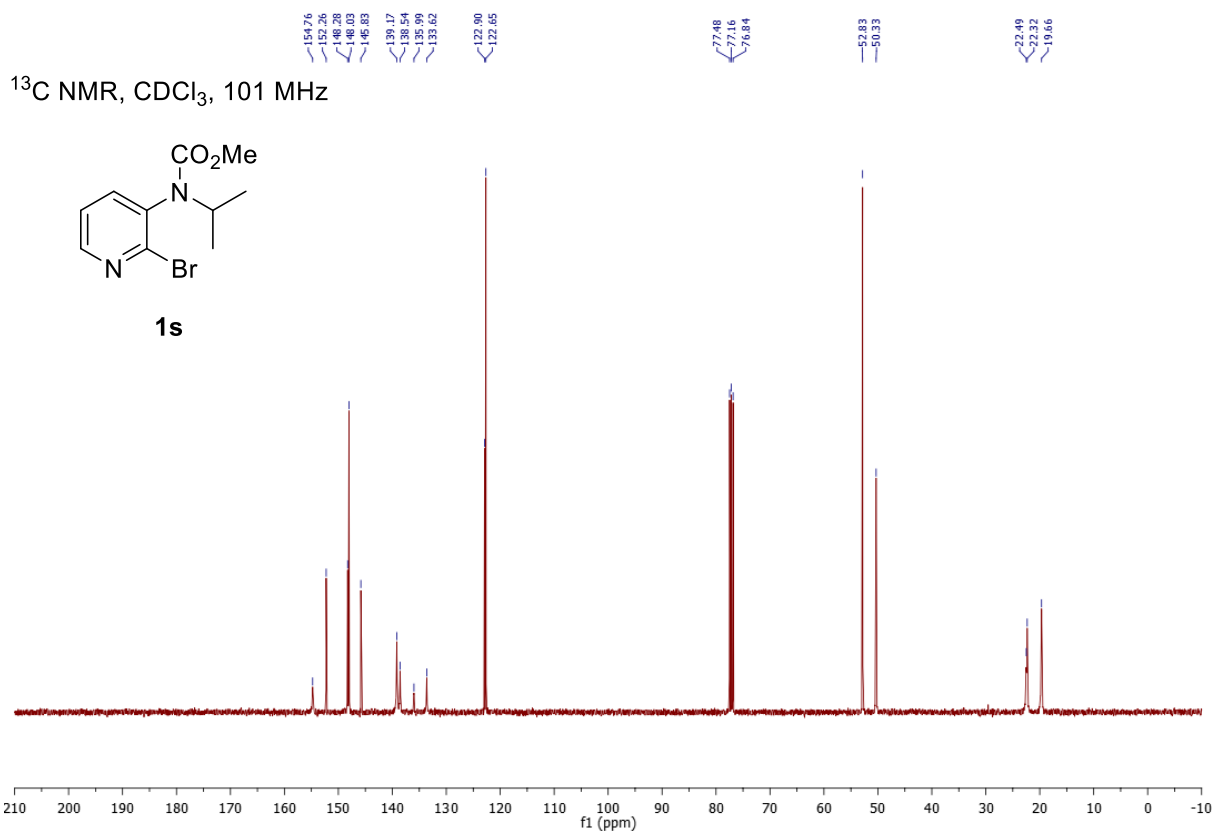

$^1\text{H}$  NMR,  $\text{CDCl}_3$ , 400 MHz

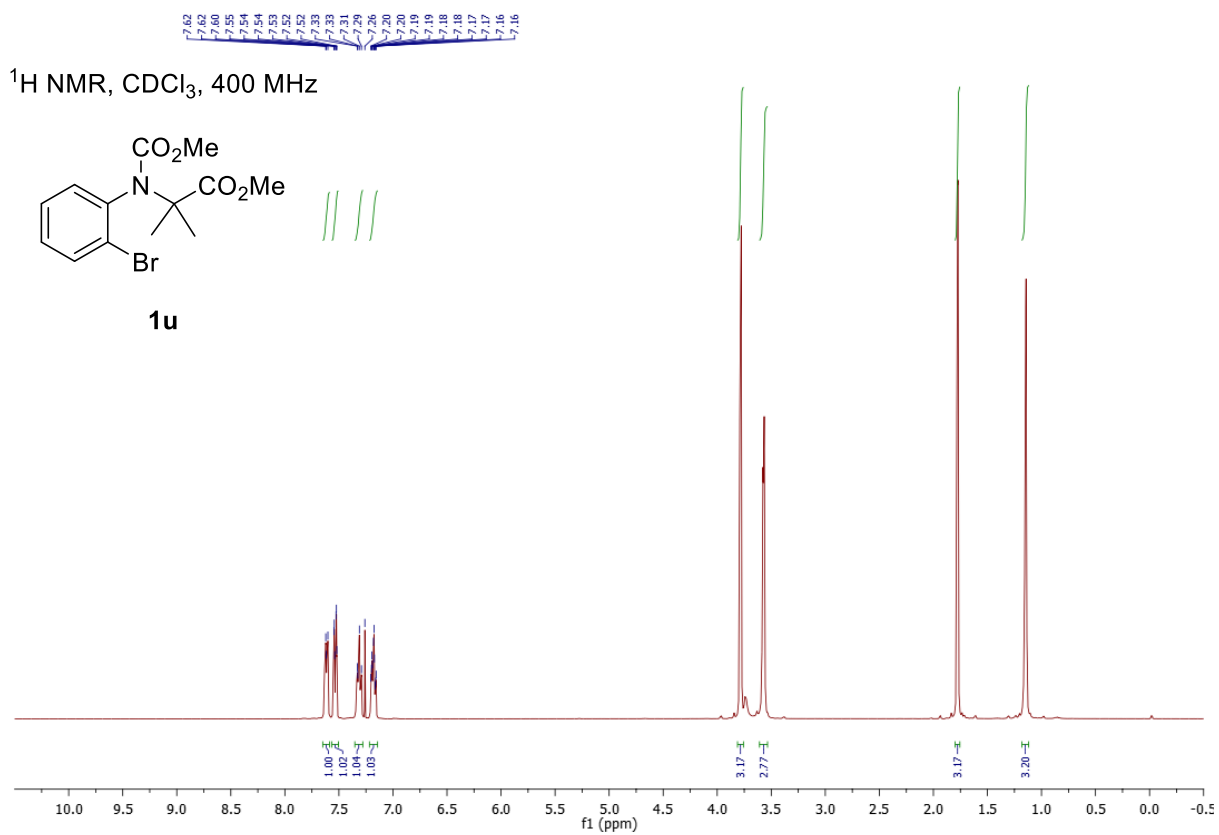

$^{13}\text{C}$  NMR,  $\text{CDCl}_3$ , 101 MHz

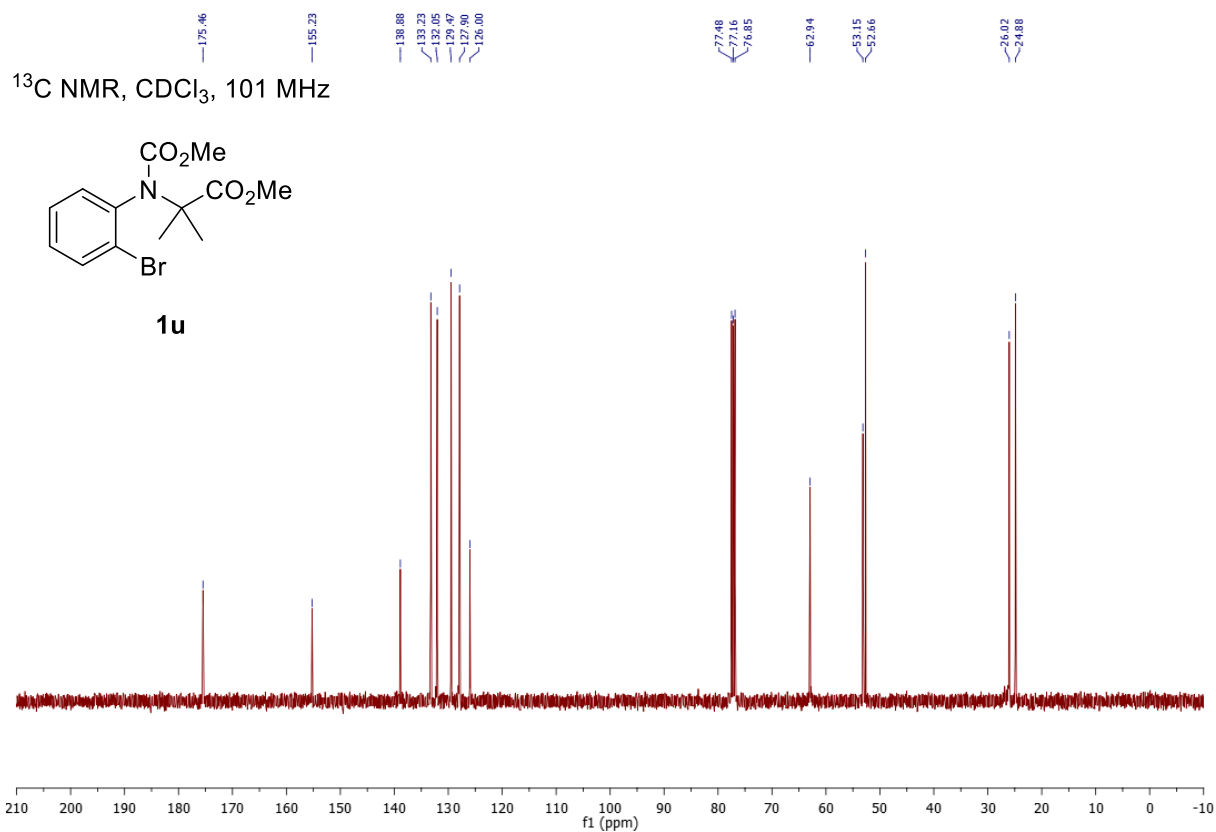

$^1\text{H}$  NMR,  $\text{CDCl}_3$ , 400 MHz

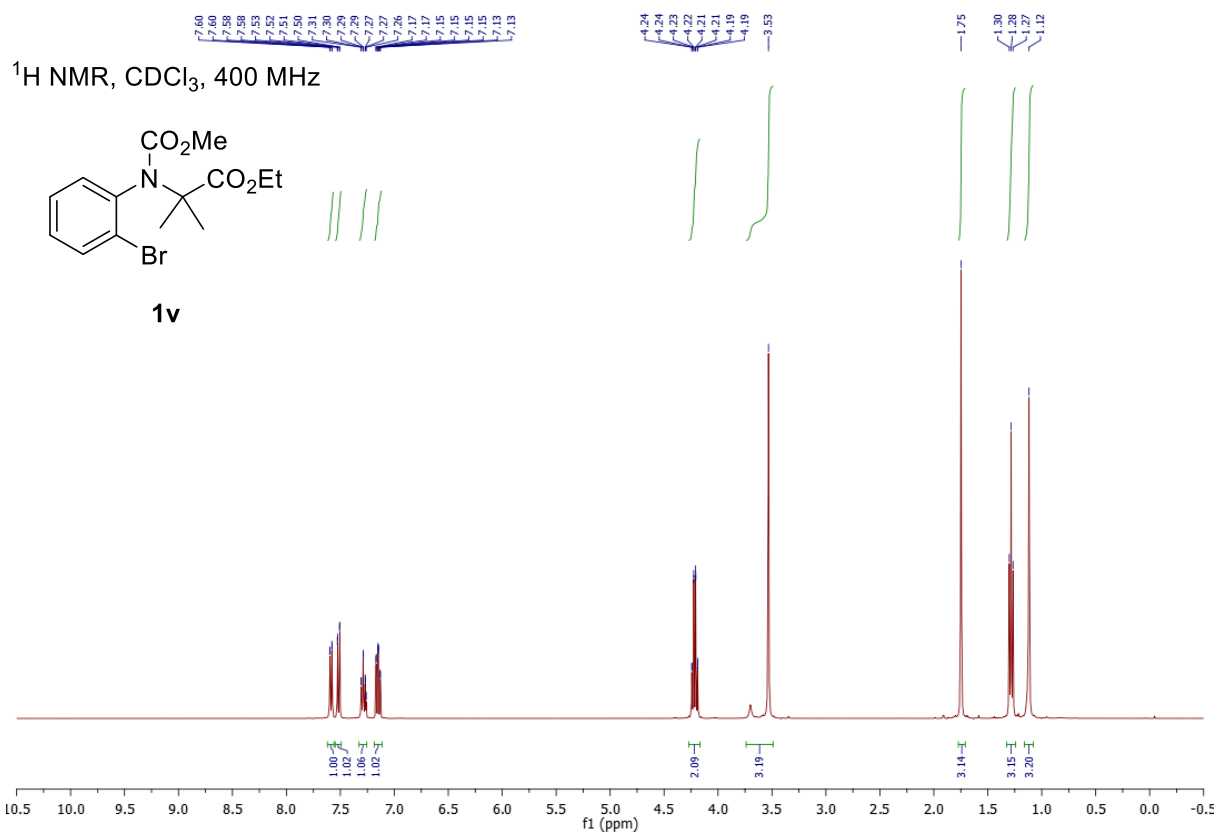



<sup>13</sup>C NMR, CDCl<sub>3</sub>, 101 MHz

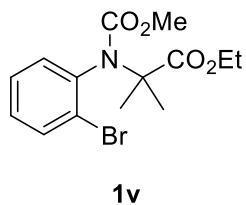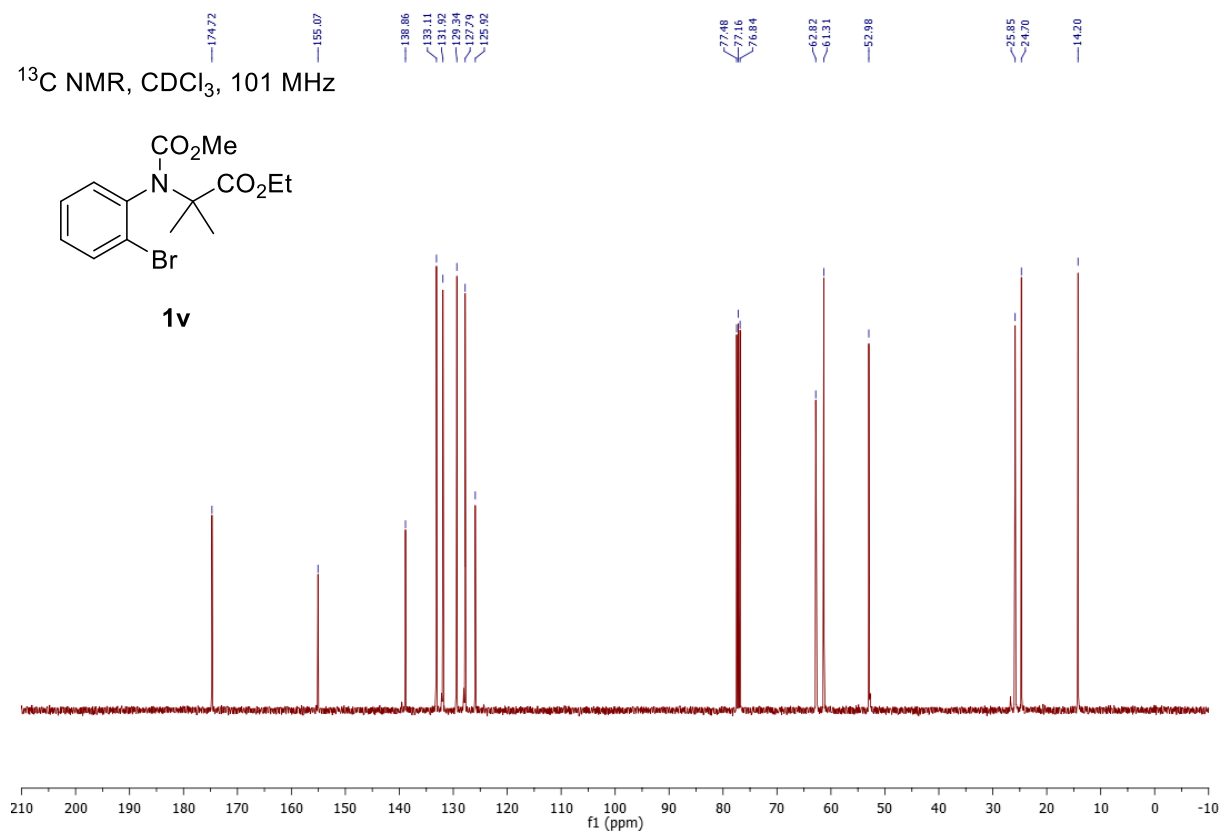

<sup>1</sup>H NMR, CDCl<sub>3</sub>, 400 MHz

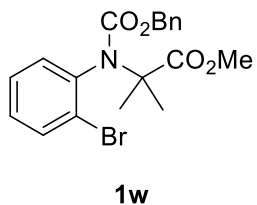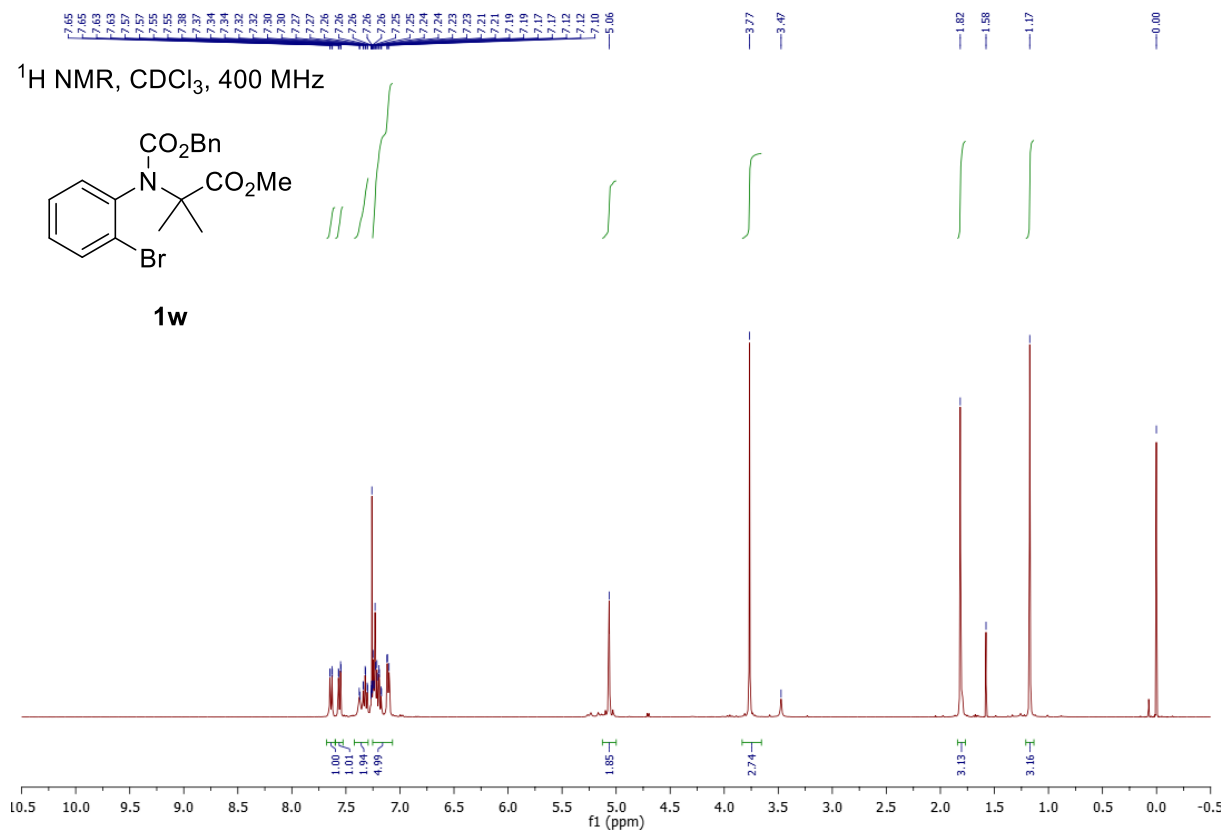

<sup>13</sup>C NMR, CDCl<sub>3</sub>, 101 MHz

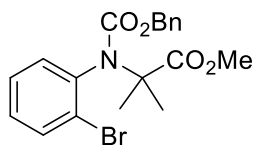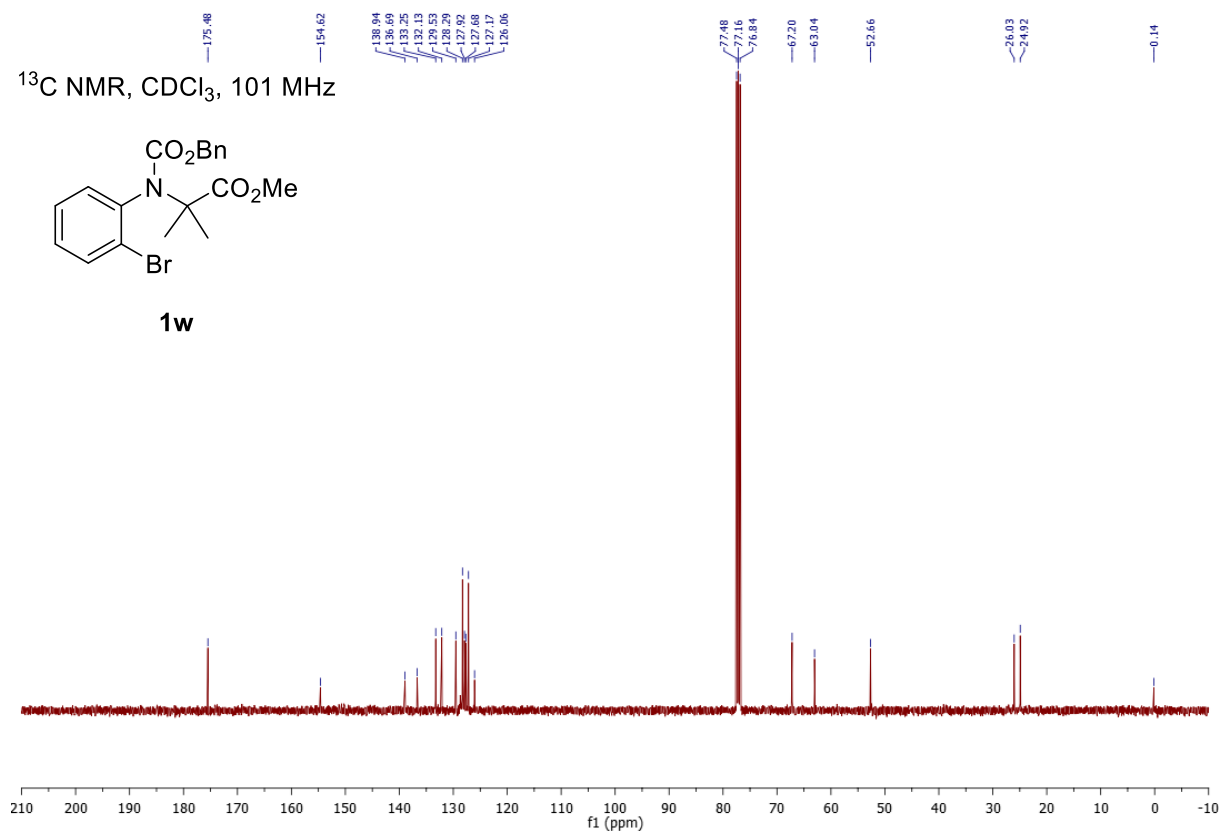

<sup>1</sup>H NMR, CDCl<sub>3</sub>, 400 MHz

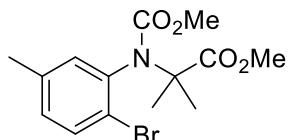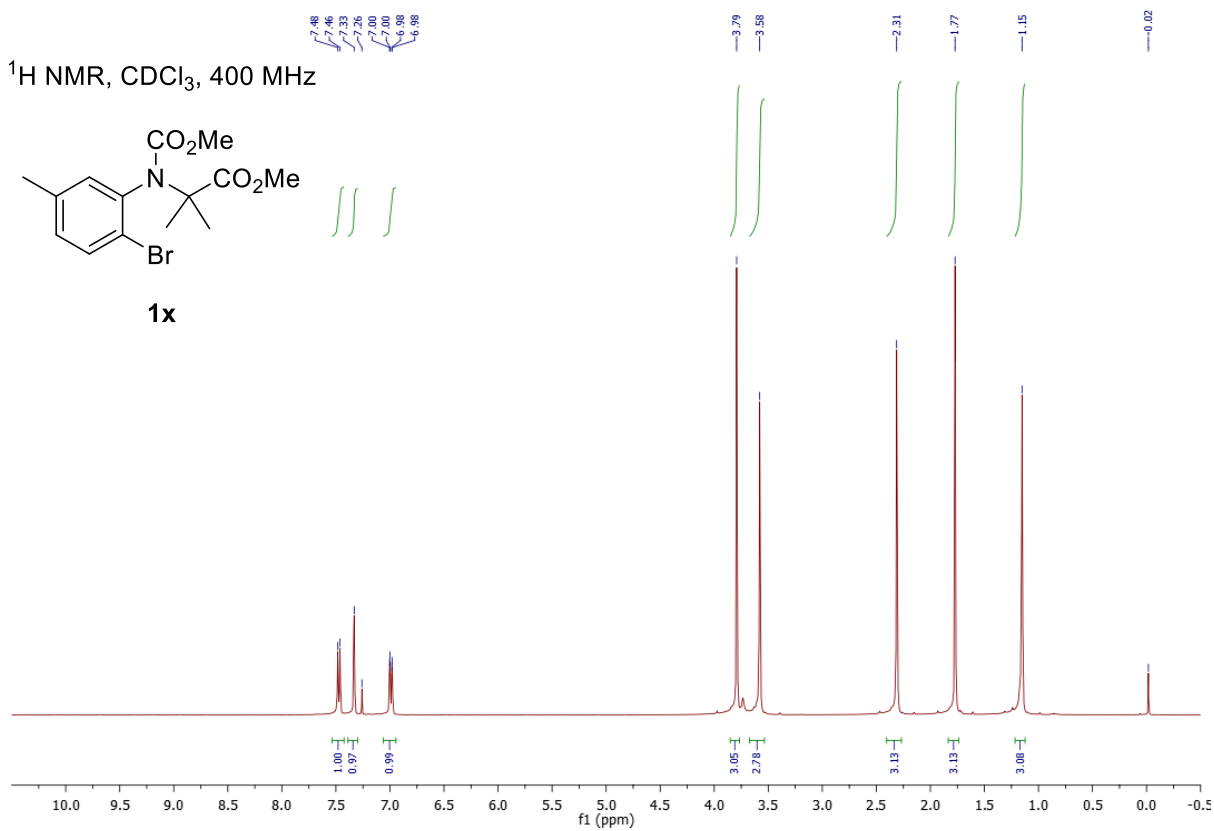

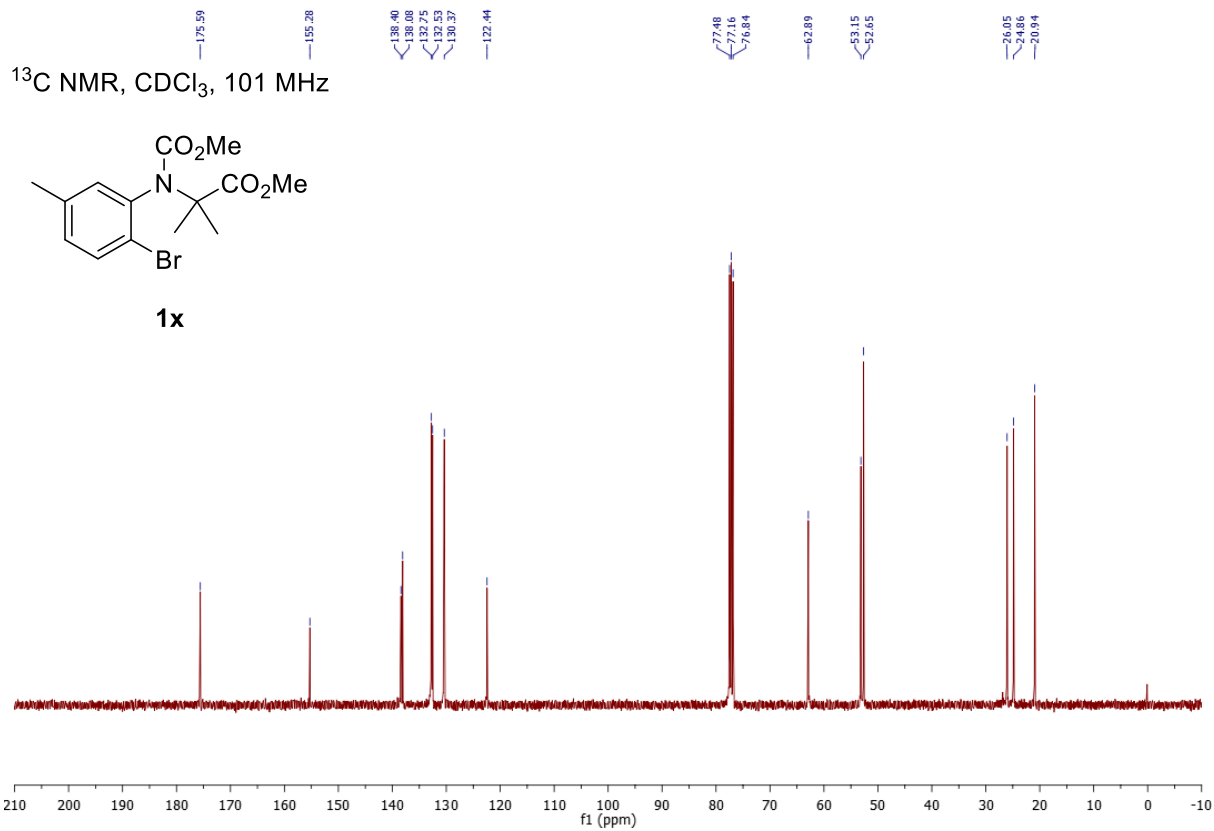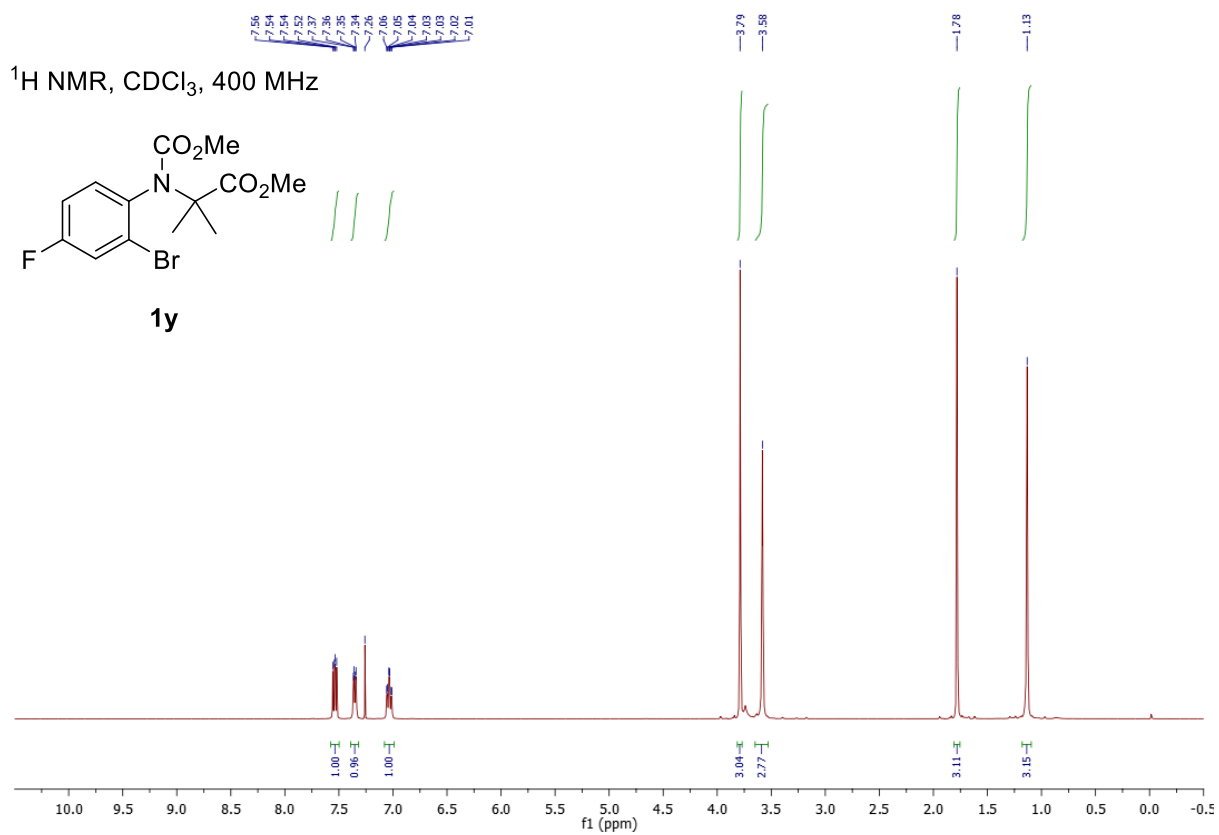

<sup>13</sup>C NMR, CDCl<sub>3</sub>, 101 MHz

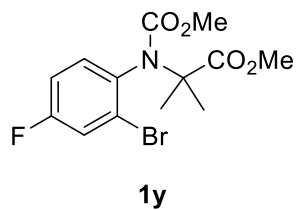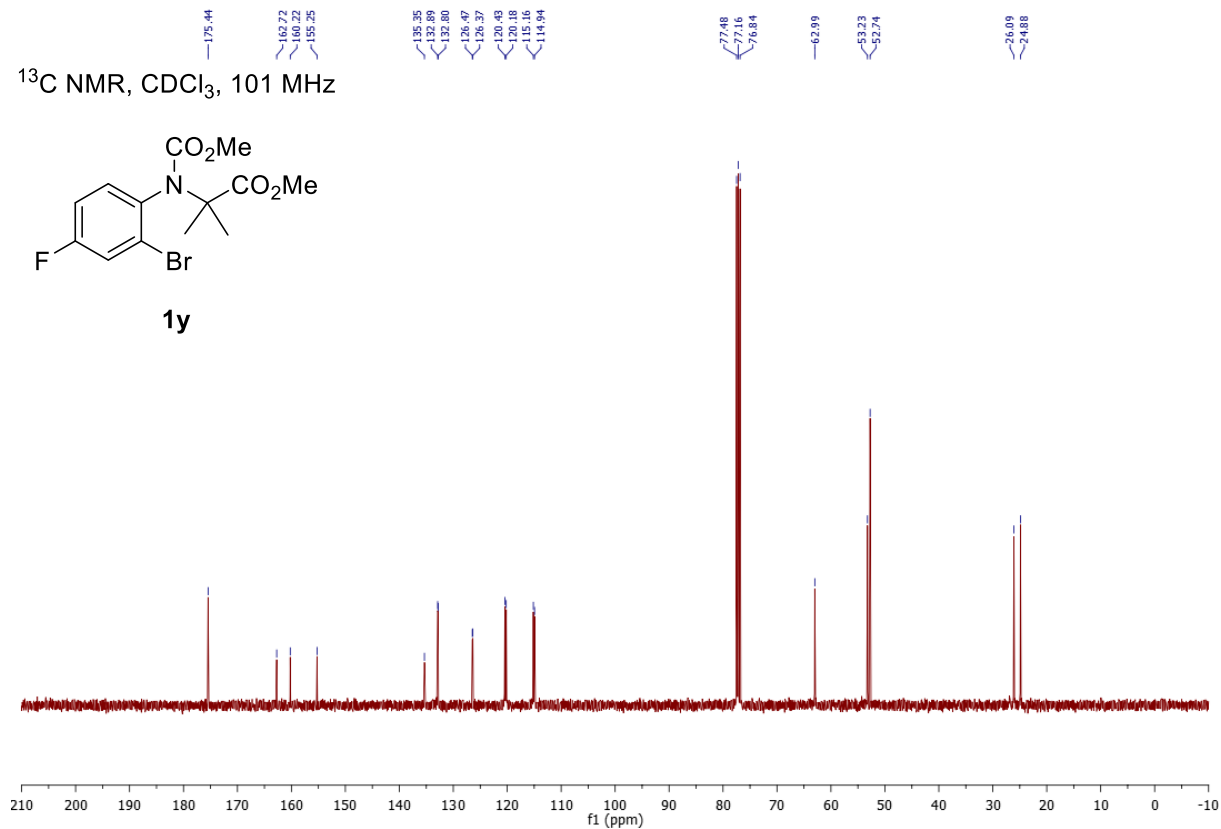

<sup>19</sup>F NMR, CDCl<sub>3</sub>, 376 MHz

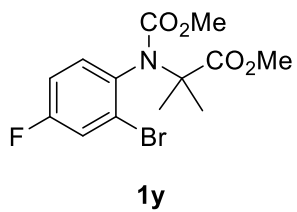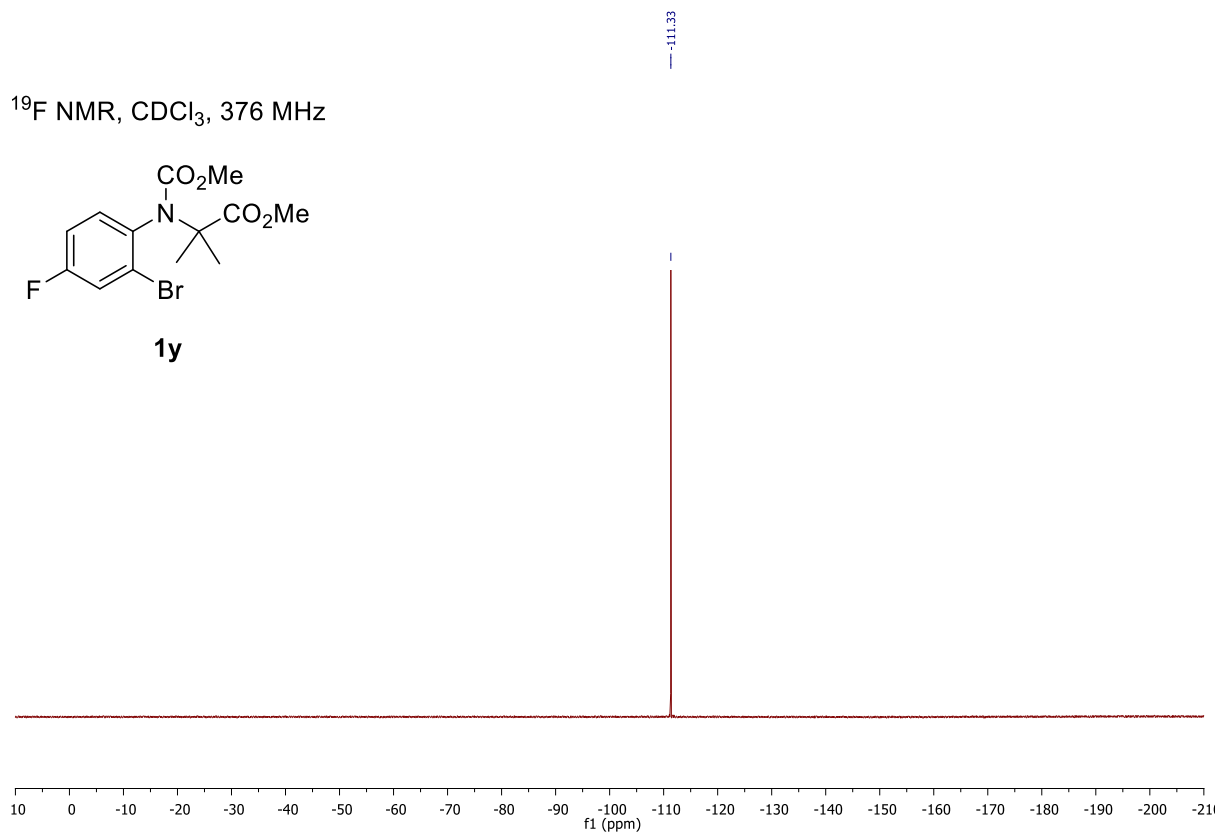

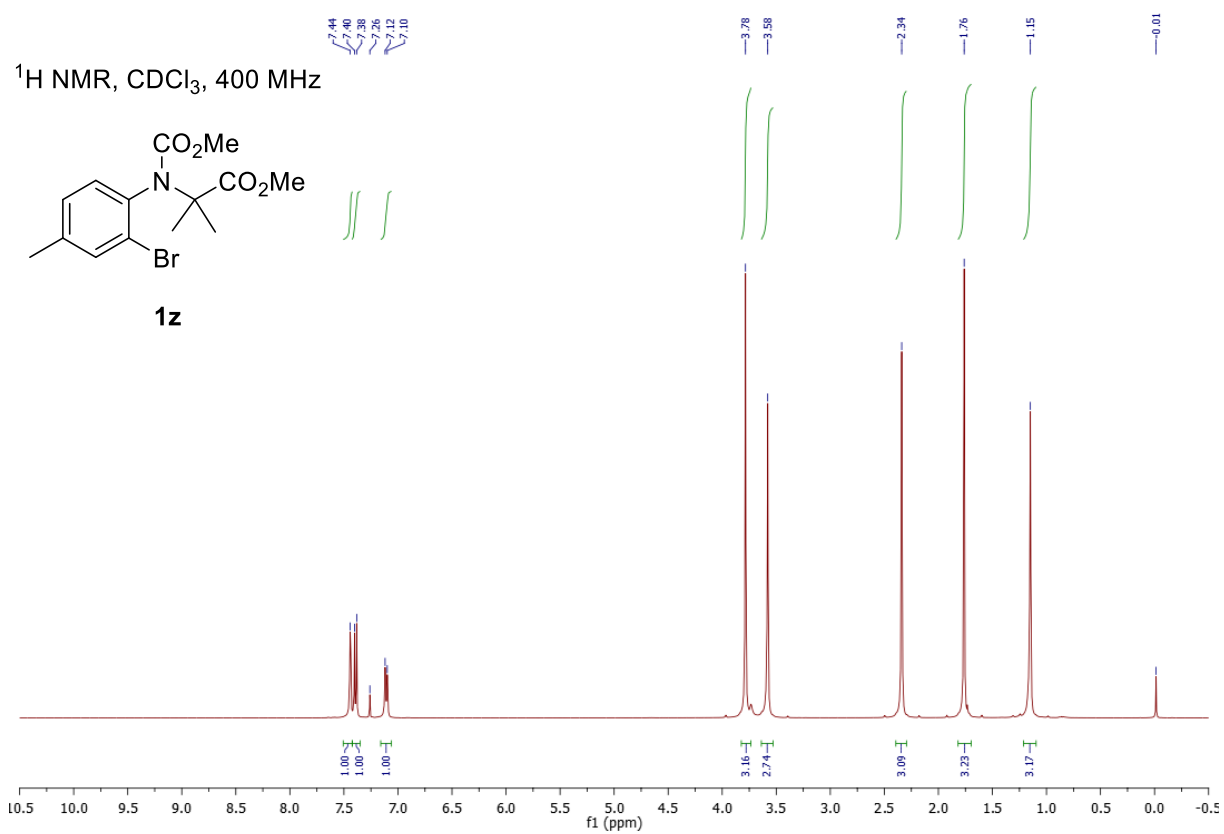

<sup>13</sup>C NMR, CDCl<sub>3</sub>, 101 MHz

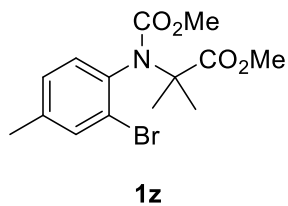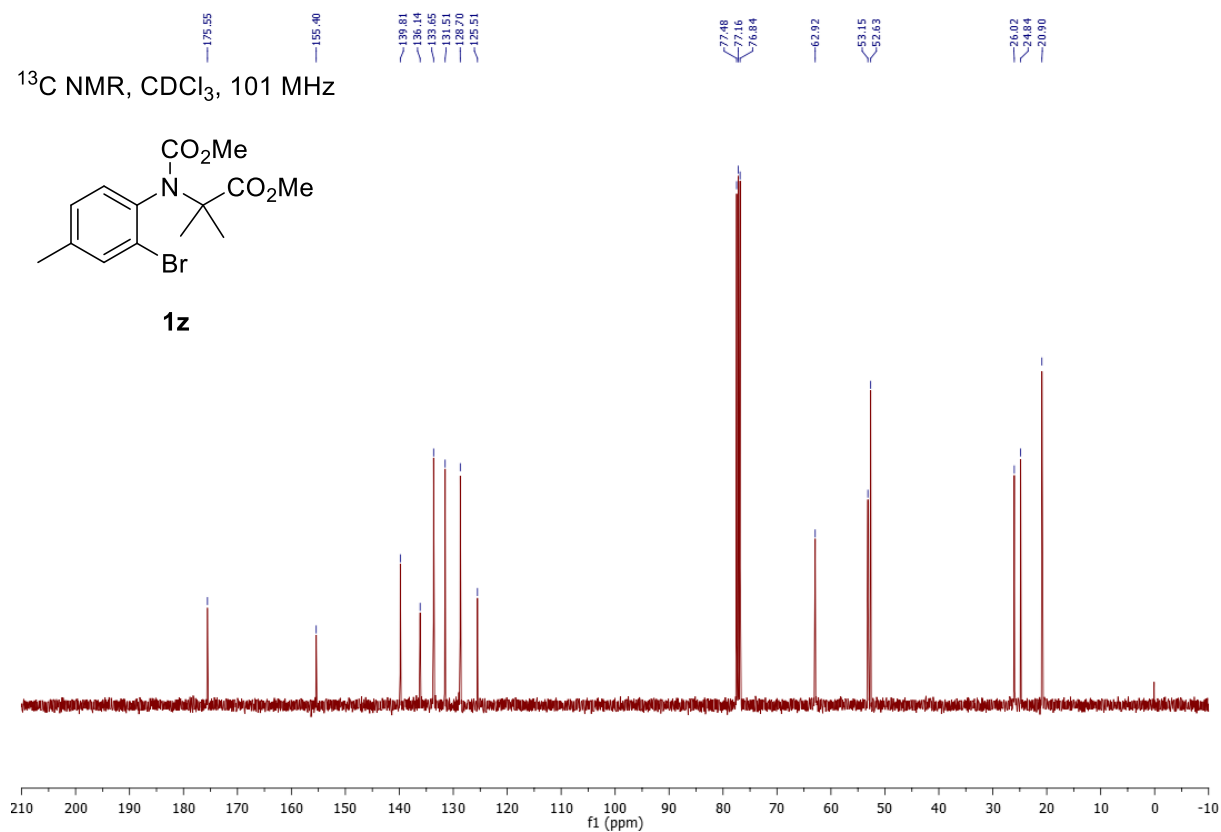

<sup>1</sup>H NMR, CDCl<sub>3</sub>, 400 MHz

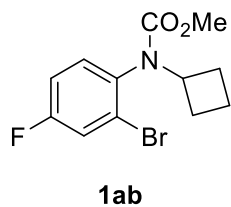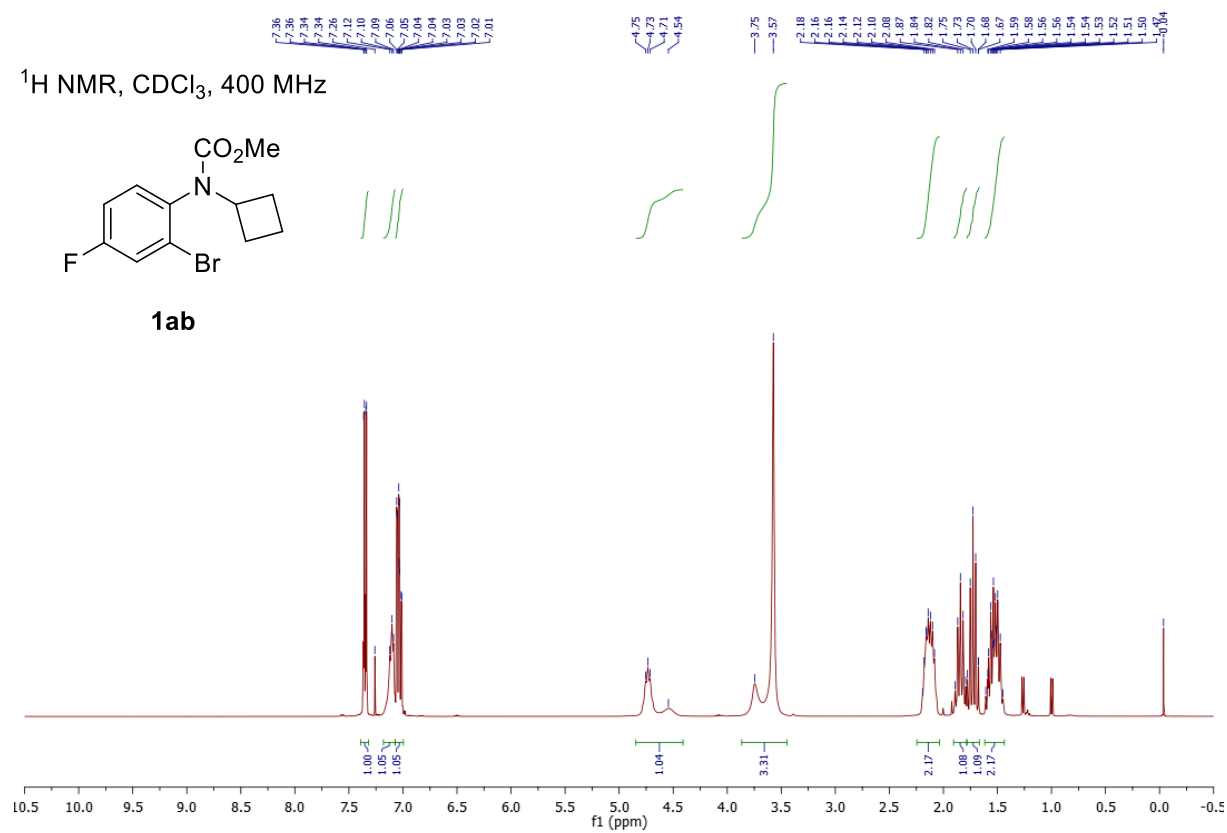

$^{13}\text{C}$  NMR,  $\text{CDCl}_3$ , 101 MHz

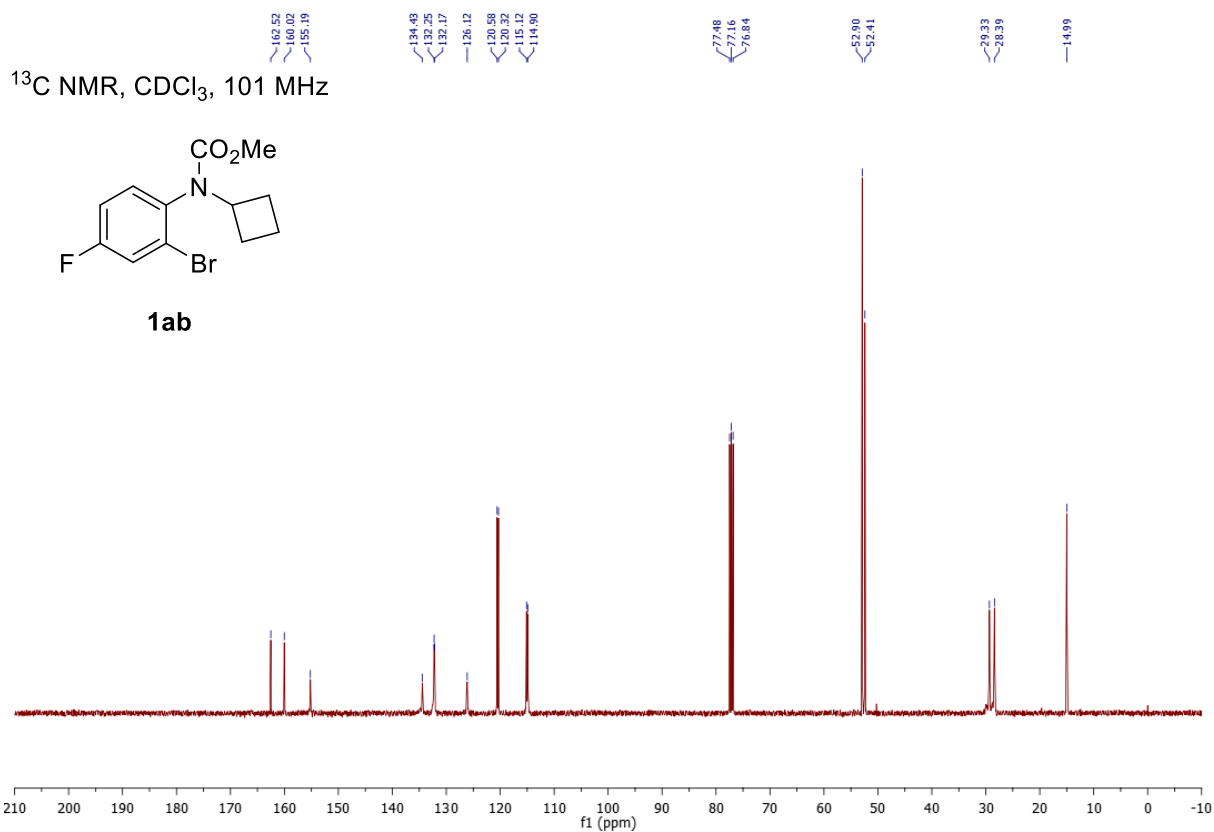

$^{19}\text{F}$  NMR,  $\text{CDCl}_3$ , 376 MHz

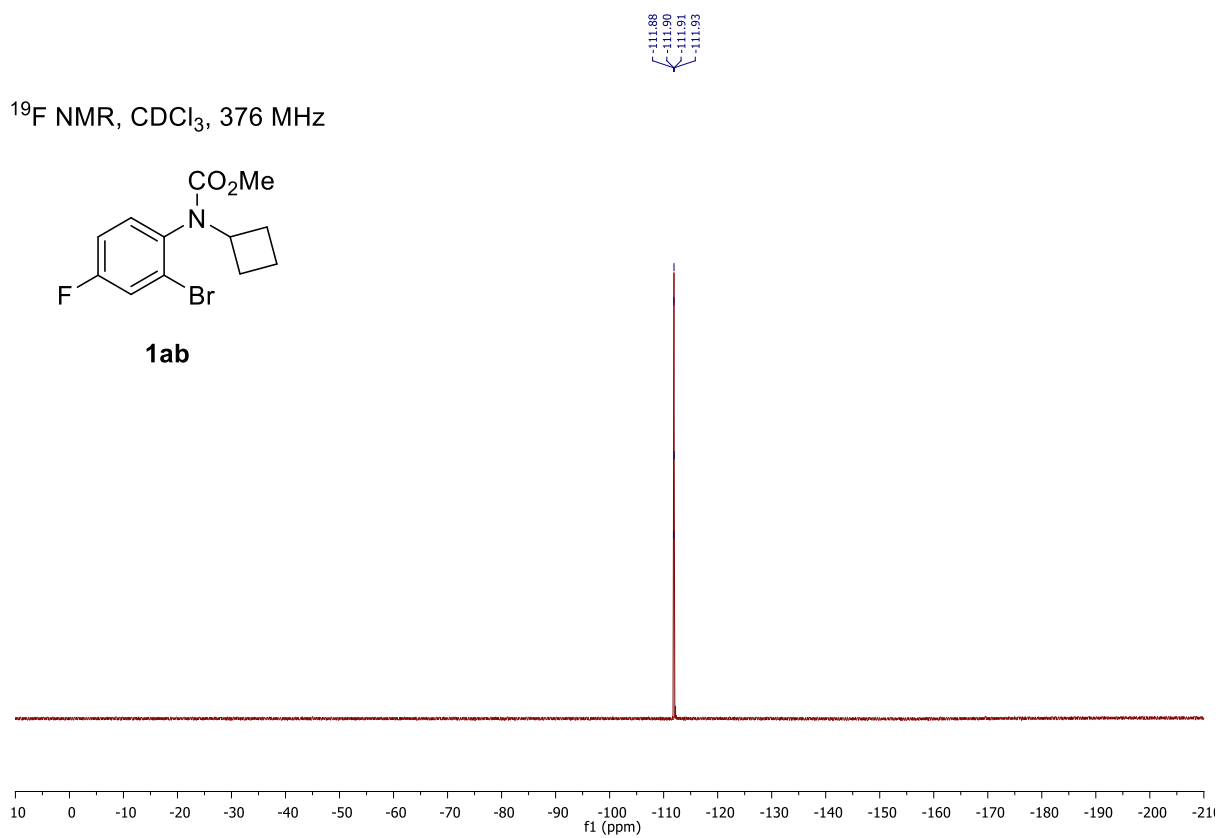

<sup>1</sup>H NMR, CDCl<sub>3</sub>, 400 MHz

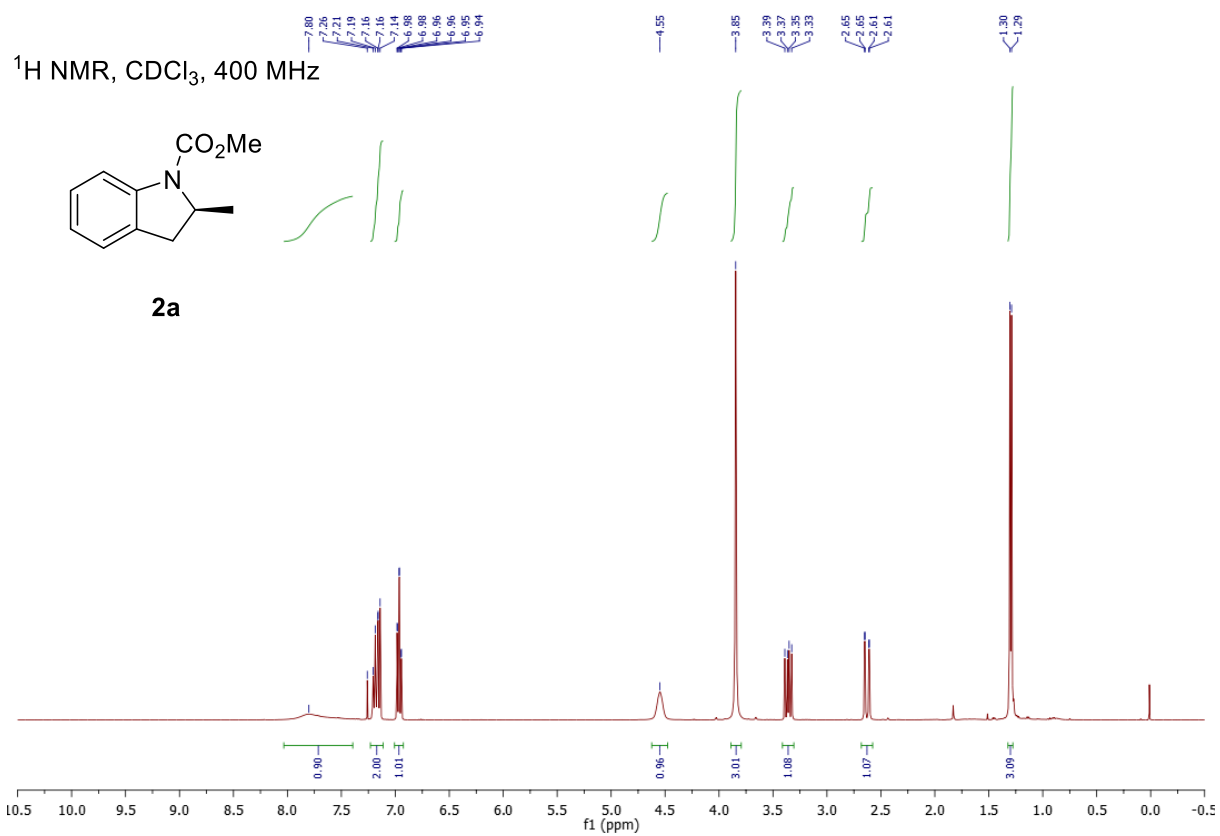

<sup>13</sup>C NMR, CDCl<sub>3</sub>, 101 MHz

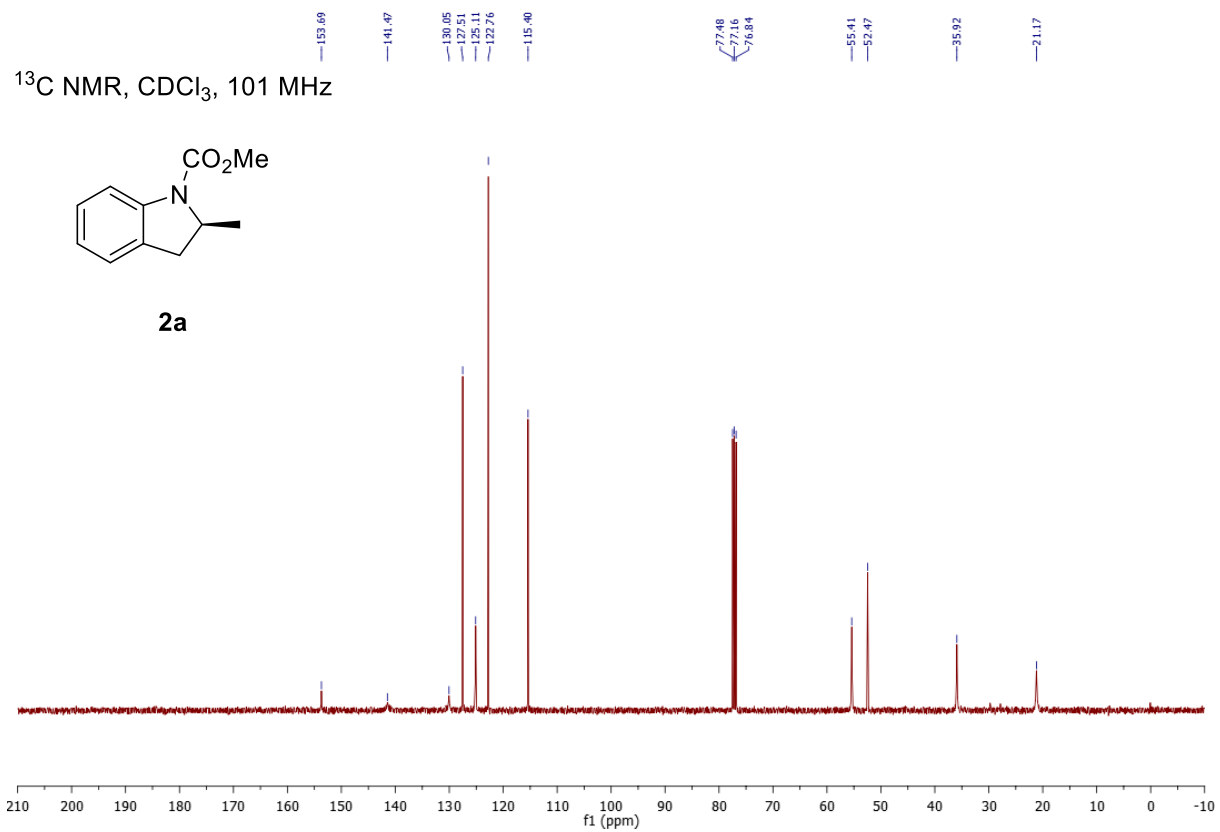



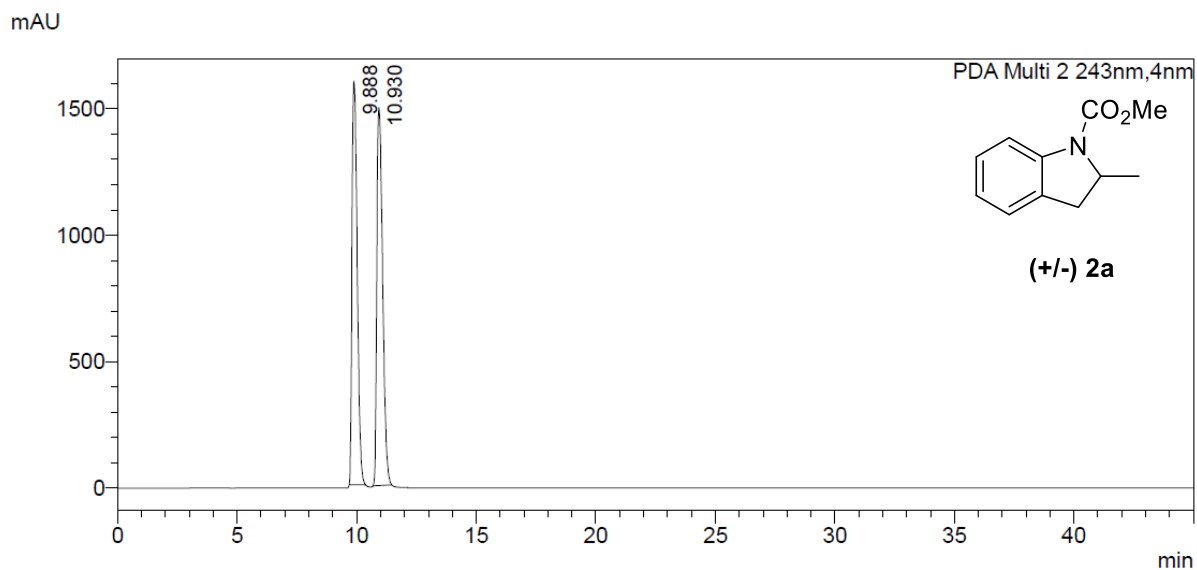

**<Peak Table>**

PDA Ch2 243nm

| Peak# | Ret. Time | Area     | Height  | Area%   |
|-------|-----------|----------|---------|---------|
| 1     | 9.888     | 24265404 | 1591847 | 49.017  |
| 2     | 10.930    | 25238882 | 1495620 | 50.983  |
| Total |           | 49504286 | 3087467 | 100.000 |

Small scale (0.2 mmol)

mAU

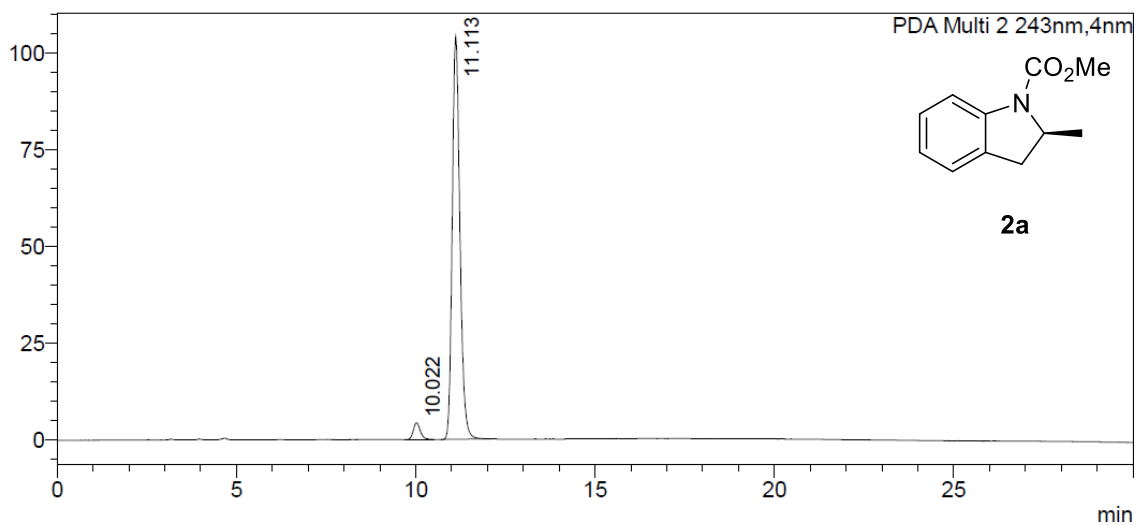

**<Peak Table>**

PDA Ch2 243nm

| Peak# | Ret. Time | Area    | Height | Area%   |
|-------|-----------|---------|--------|---------|
| 1     | 10.022    | 58166   | 4319   | 3.619   |
| 2     | 11.113    | 1548946 | 103968 | 96.381  |
| Total |           | 1607112 | 108287 | 100.000 |

Gram scale (5 mmol)

mAU

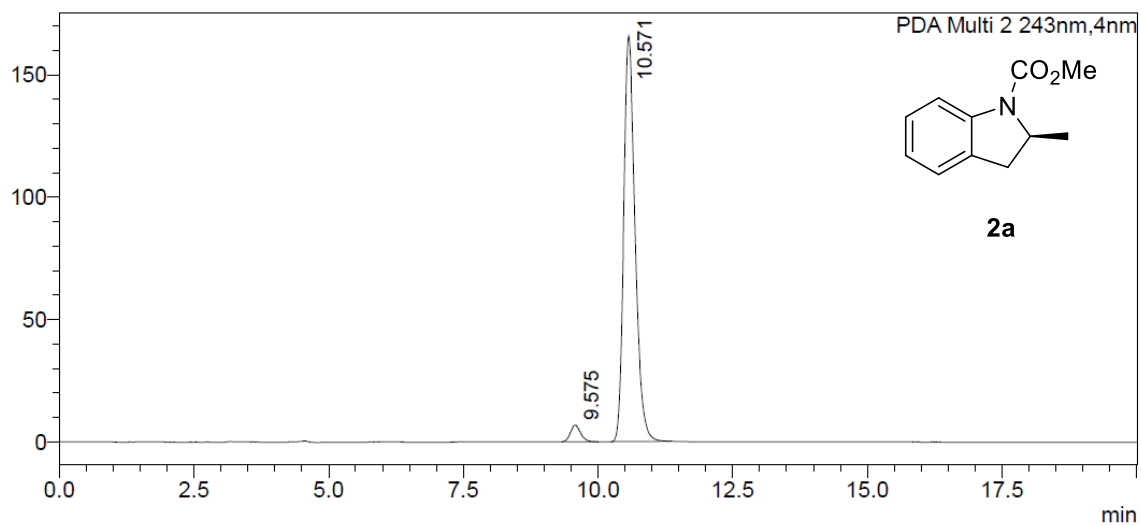

**<Peak Table>**

PDA Ch2 243nm

| Peak# | Ret. Time | Area    | Height | Area%   |
|-------|-----------|---------|--------|---------|
| 1     | 9.575     | 88777   | 6793   | 3.521   |
| 2     | 10.571    | 2432462 | 165708 | 96.479  |
| Total |           | 2521239 | 172501 | 100.000 |

Methyl 2-chlorophenyl(isopropyl)carbamate as the substrate

mAU

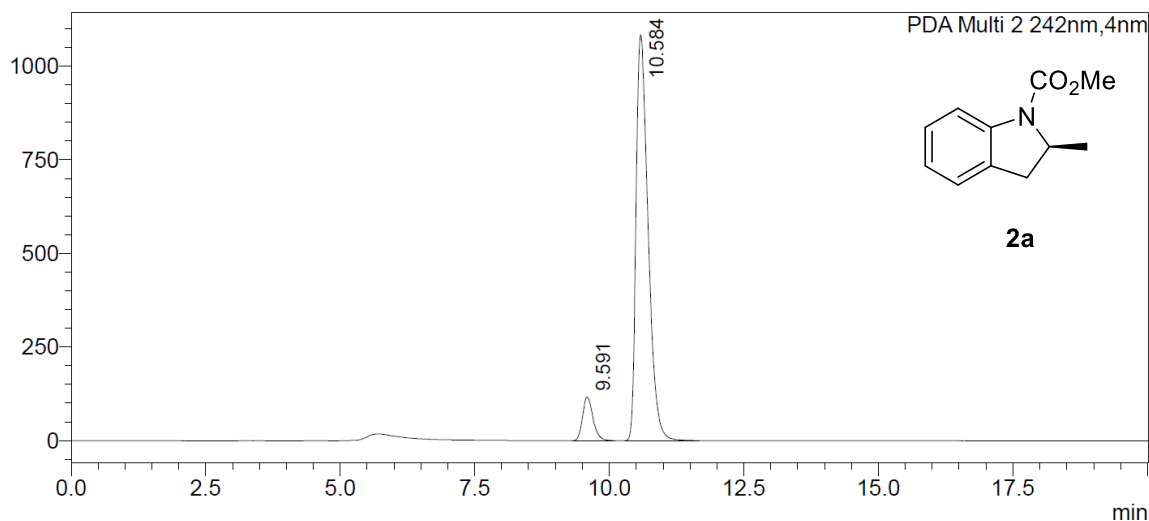

**<Peak Table>**

PDA Ch2 242nm

| Peak# | Ret. Time | Area     | Height  | Area%   |
|-------|-----------|----------|---------|---------|
| 1     | 9.591     | 1570580  | 117053  | 8.529   |
| 2     | 10.584    | 16844490 | 1083280 | 91.471  |
| Total |           | 18415070 | 1200333 | 100.000 |

Methyl 2-iodophenyl(isopropyl)carbamate as the substrate

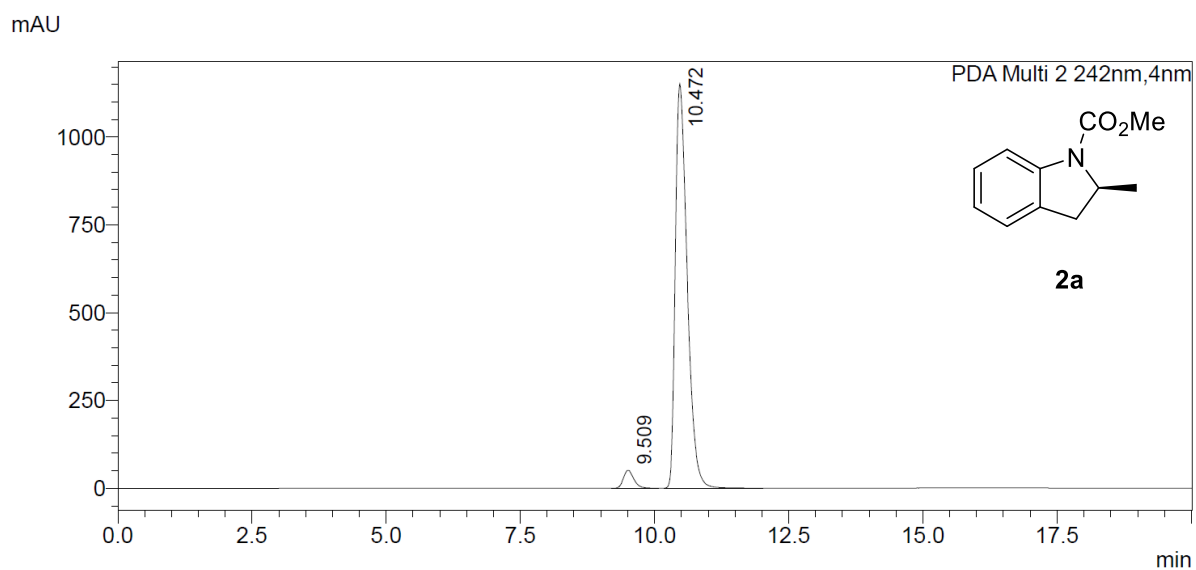

**<Peak Table>**

PDA Ch2 242nm

| Peak# | Ret. Time | Area     | Height  | Area%   |
|-------|-----------|----------|---------|---------|
| 1     | 9.509     | 684830   | 51133   | 3.722   |
| 2     | 10.472    | 17716701 | 1150815 | 96.278  |
| Total |           | 18401531 | 1201947 | 100.000 |

<sup>1</sup>H NMR, CDCl<sub>3</sub>, 400 MHz

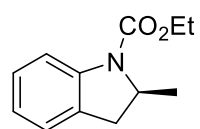

**2b**

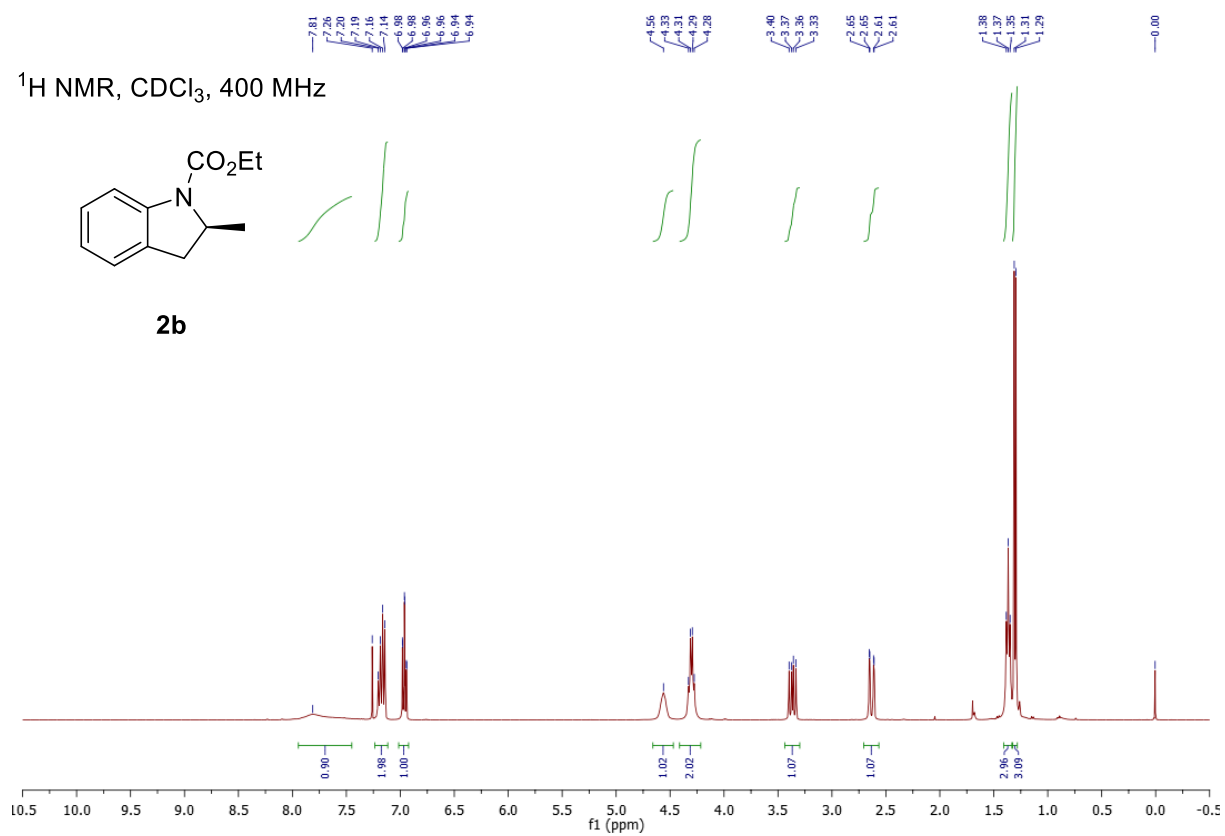

<sup>13</sup>C NMR, CDCl<sub>3</sub>, 101 MHz

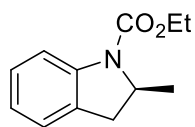

**2b**

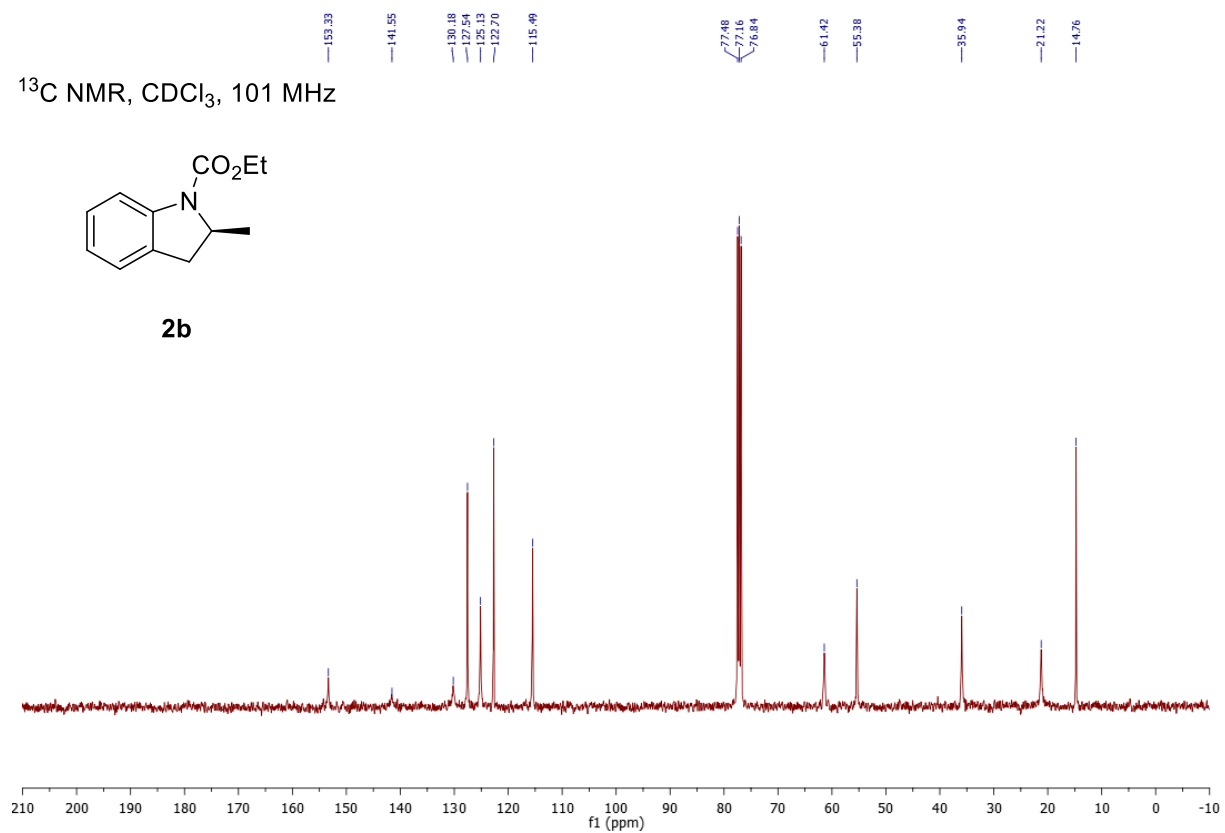

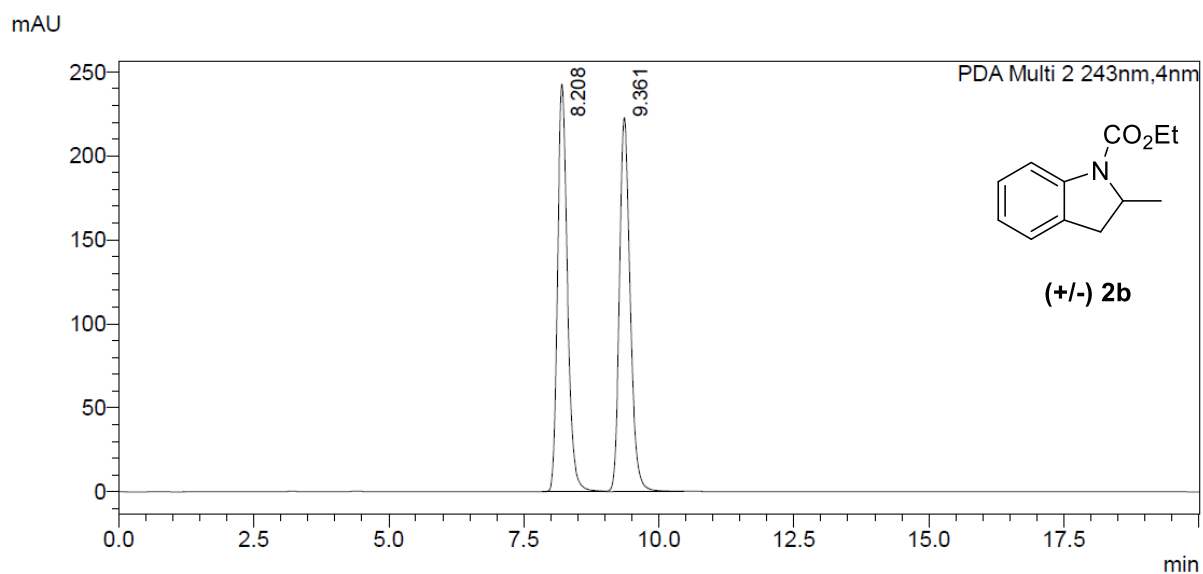

**<Peak Table>**

PDA Ch2 243nm

| Peak# | Ret. Time | Area    | Height | Area%   |
|-------|-----------|---------|--------|---------|
| 1     | 8.208     | 3075134 | 242442 | 49.975  |
| 2     | 9.361     | 3078236 | 222441 | 50.025  |
| Total |           | 6153370 | 464883 | 100.000 |

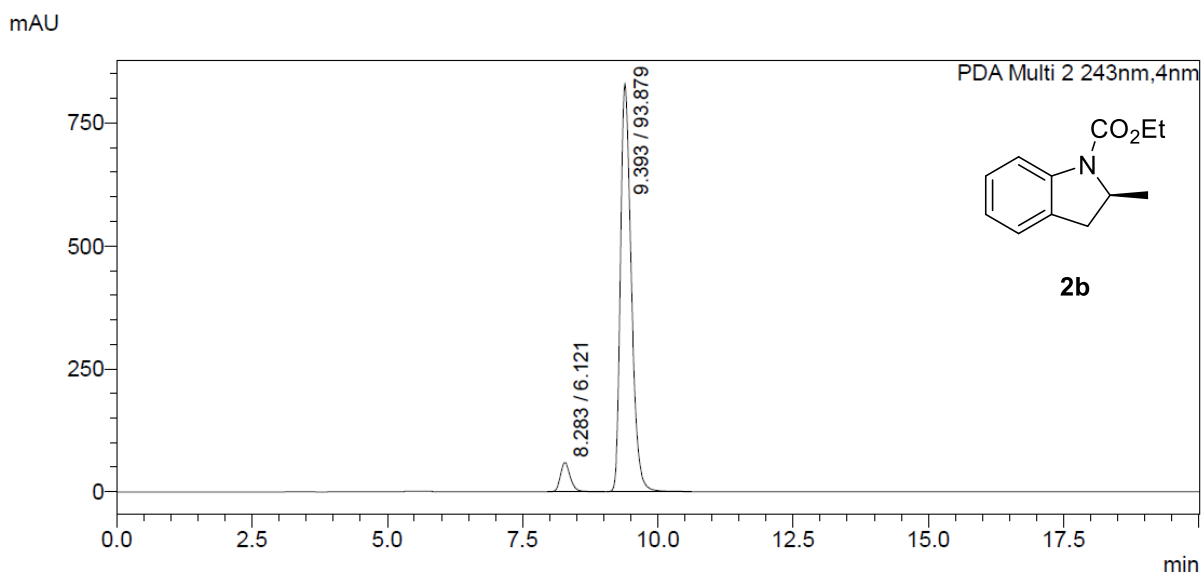

**<Peak Table>**

PDA Ch2 243nm

| Peak# | Ret. Time | Area     | Height | Area%   |
|-------|-----------|----------|--------|---------|
| 1     | 8.283     | 753891   | 59486  | 6.121   |
| 2     | 9.393     | 11561909 | 829587 | 93.879  |
| Total |           | 12315801 | 889073 | 100.000 |

<sup>1</sup>H NMR, CDCl<sub>3</sub>, 400 MHz

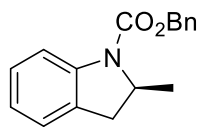

**2c**

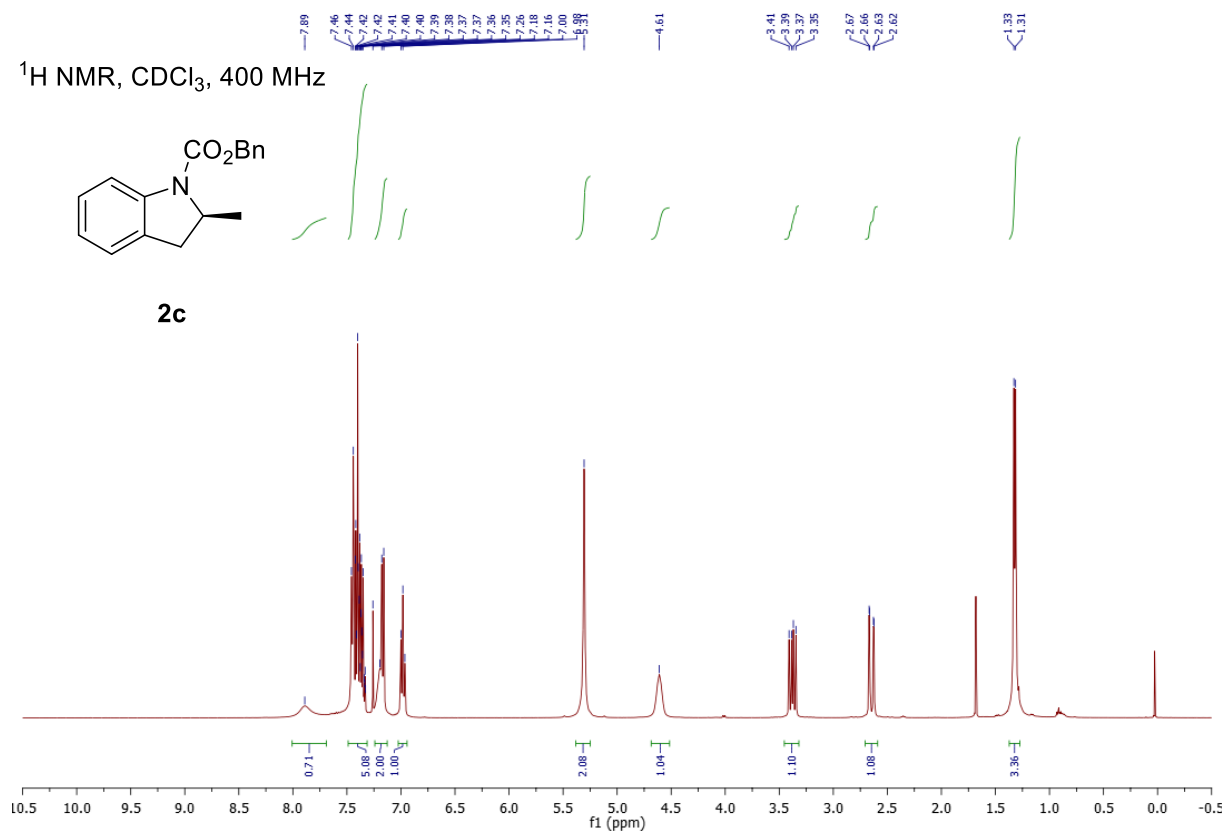

<sup>13</sup>C NMR, CDCl<sub>3</sub>, 101 MHz

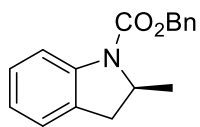

**2c**

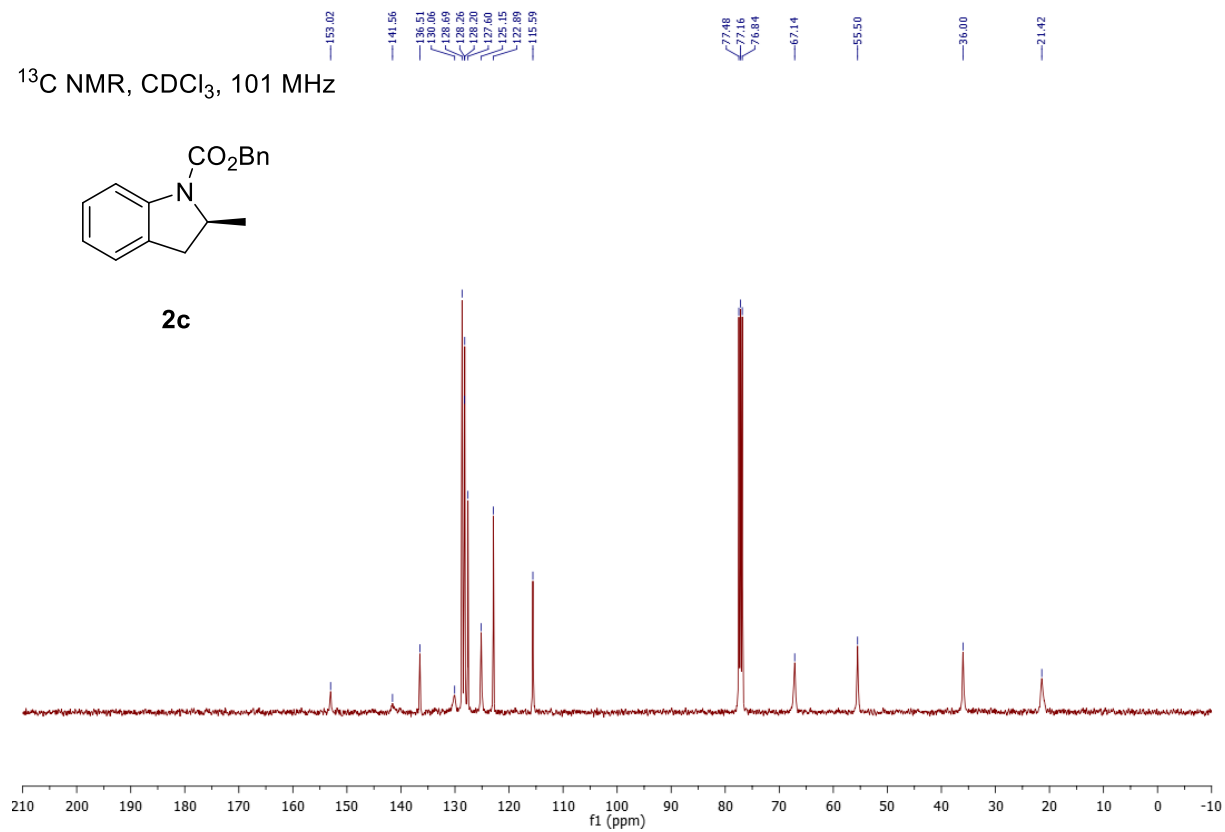

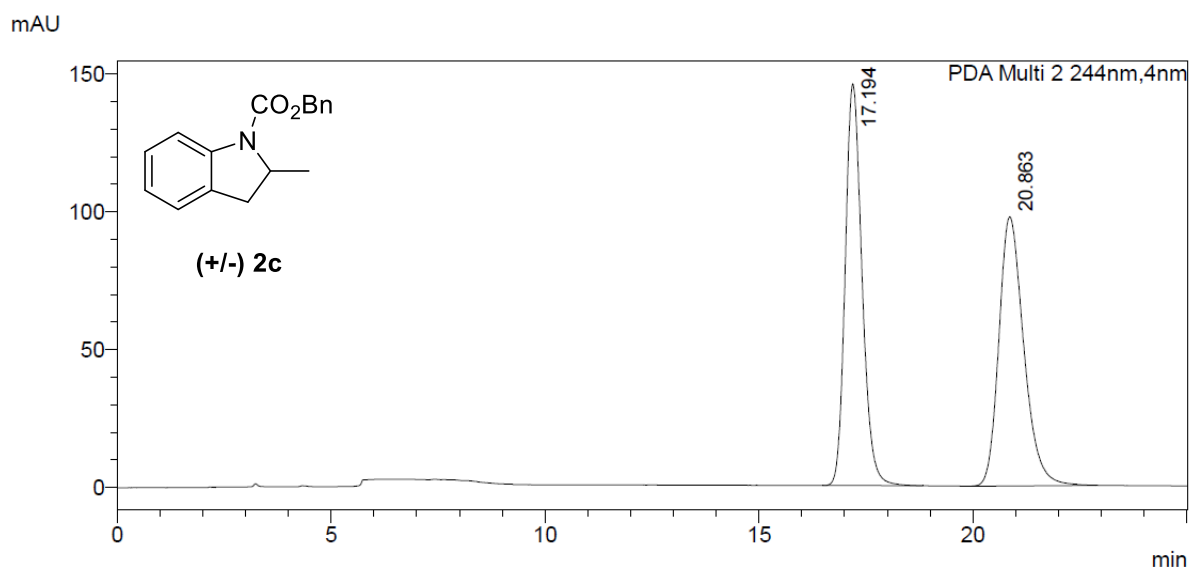

**<Peak Table>**

PDA Ch2 244nm

| Peak# | Ret. Time | Area    | Height | Area%   |
|-------|-----------|---------|--------|---------|
| 1     | 17.194    | 3972368 | 145545 | 50.154  |
| 2     | 20.863    | 3947941 | 97514  | 49.846  |
| Total |           | 7920309 | 243059 | 100.000 |

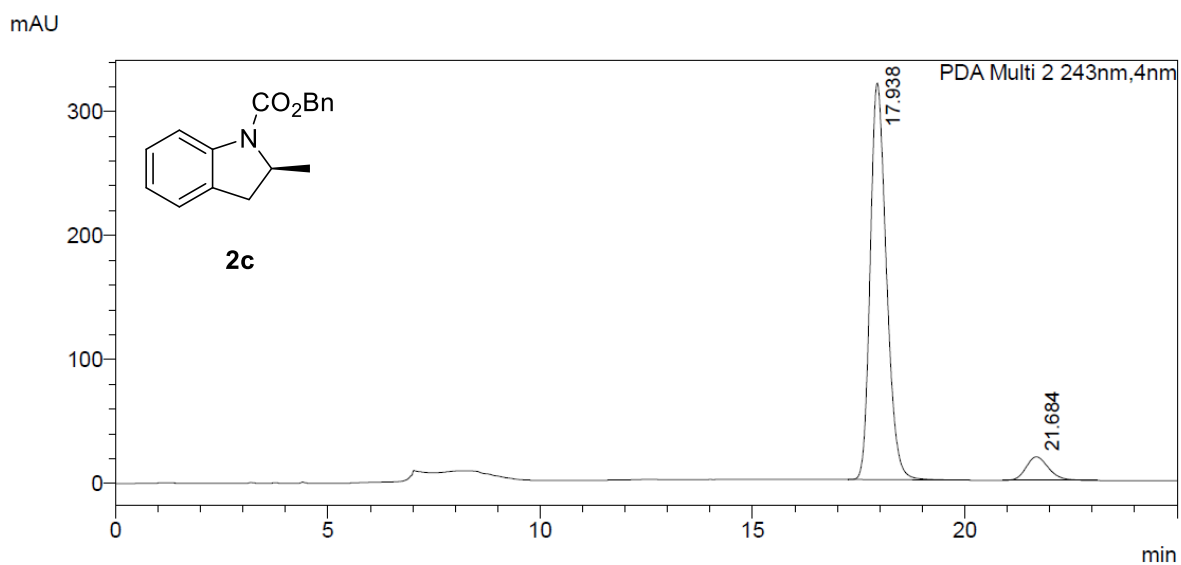

**<Peak Table>**

PDA Ch2 243nm

| Peak# | Ret. Time | Area    | Height | Area%   |
|-------|-----------|---------|--------|---------|
| 1     | 17.938    | 8483025 | 319782 | 92.342  |
| 2     | 21.684    | 703458  | 19002  | 7.658   |
| Total |           | 9186483 | 338784 | 100.000 |

<sup>1</sup>H NMR, CDCl<sub>3</sub>, 400 MHz

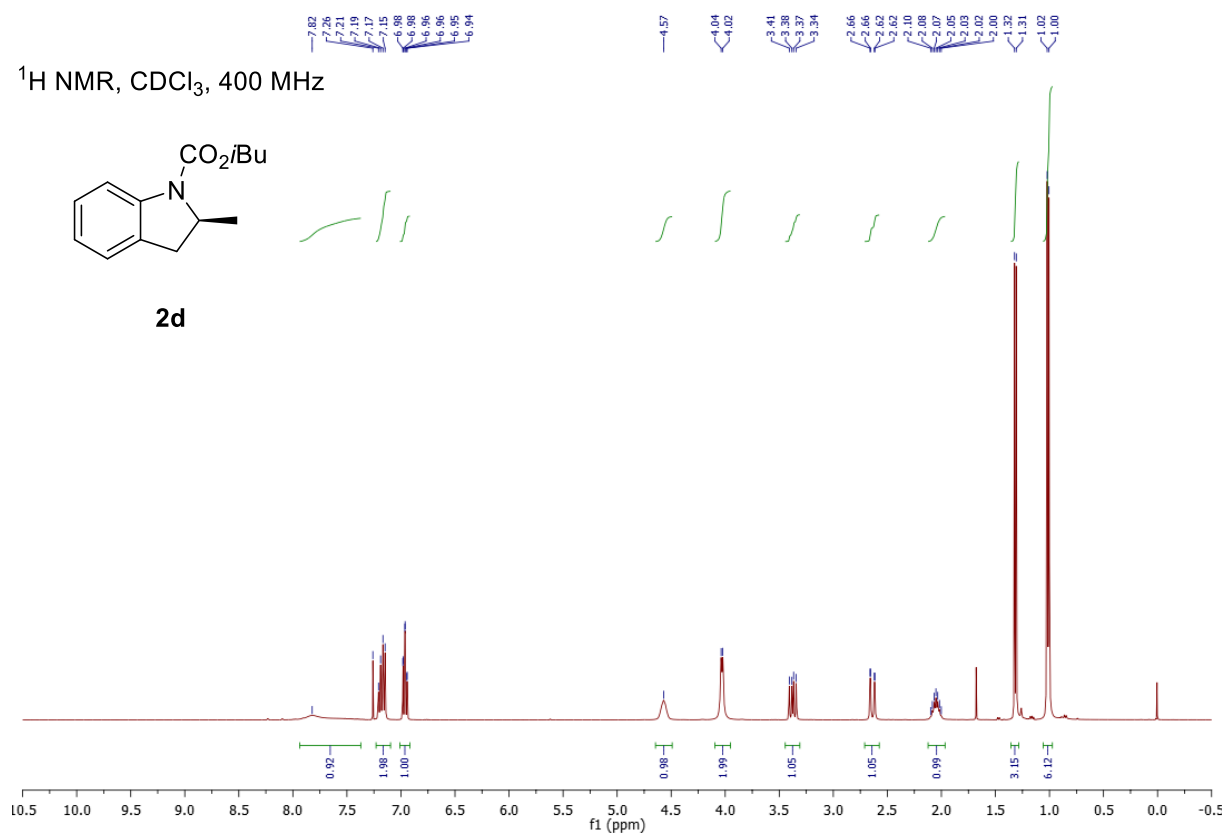

<sup>13</sup>C NMR, CDCl<sub>3</sub>, 101 MHz

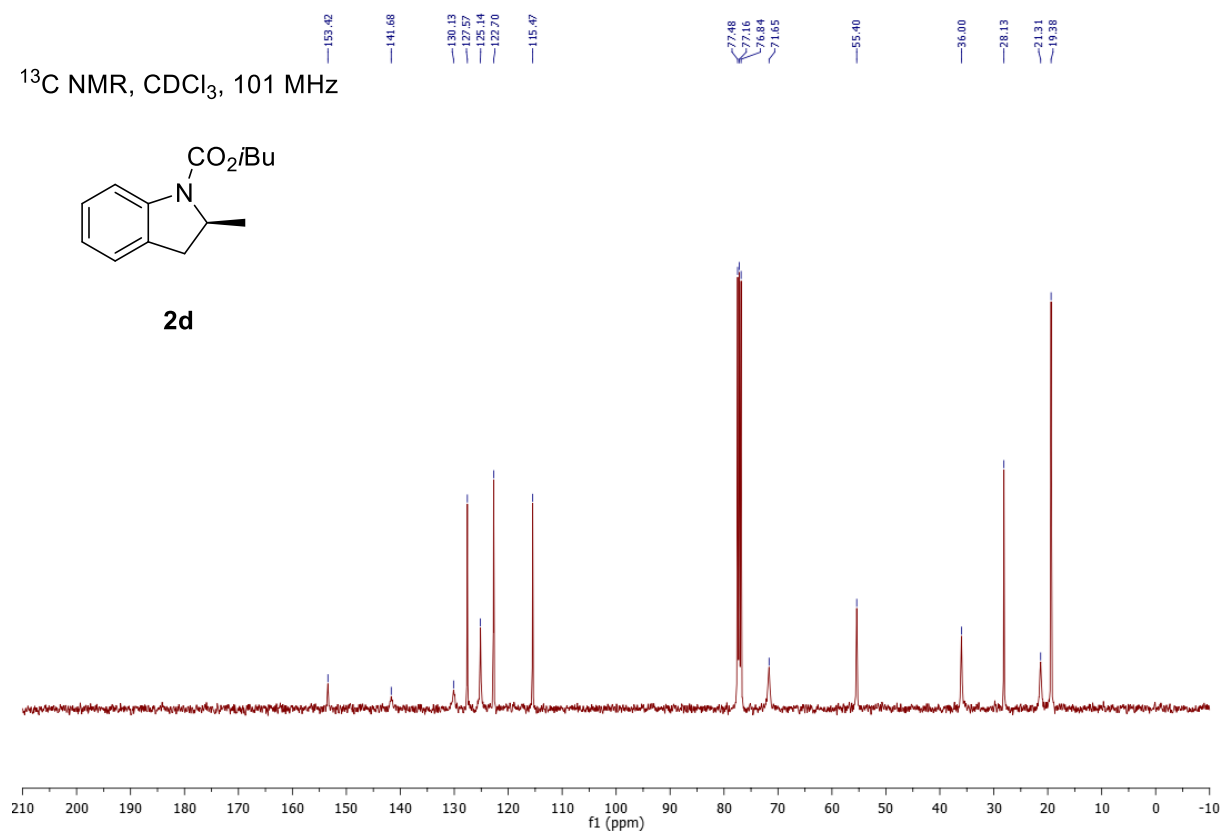



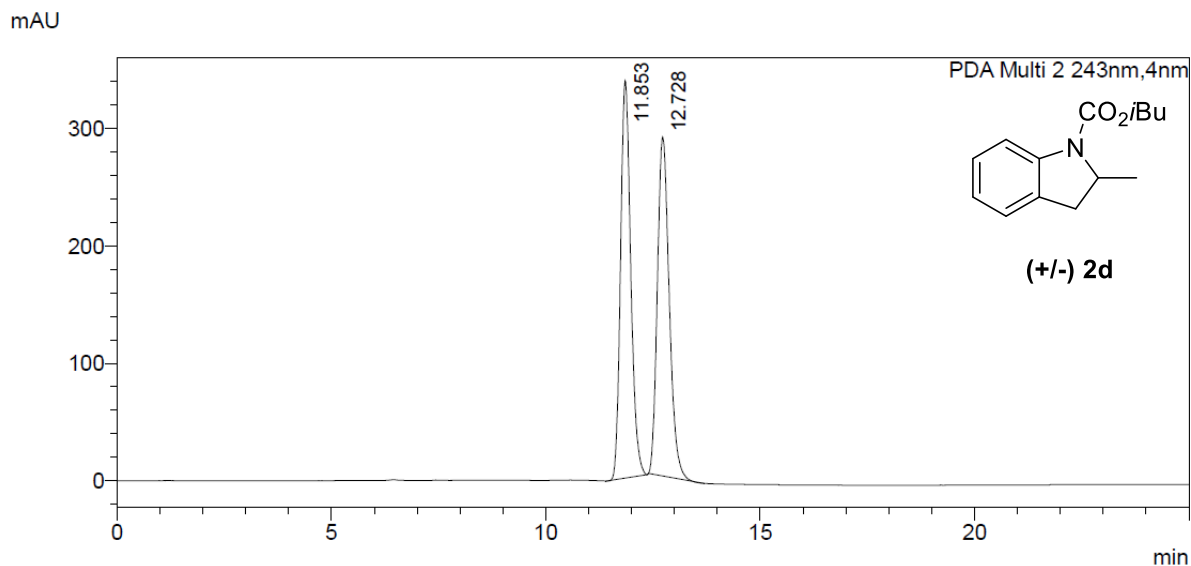

<Peak Table>

PDA Ch2 243nm

| Peak# | Ret. Time | Area     | Height | Area%   |
|-------|-----------|----------|--------|---------|
| 1     | 11.853    | 5603938  | 338509 | 50.240  |
| 2     | 12.728    | 5550466  | 288814 | 49.760  |
| Total |           | 11154404 | 627323 | 100.000 |

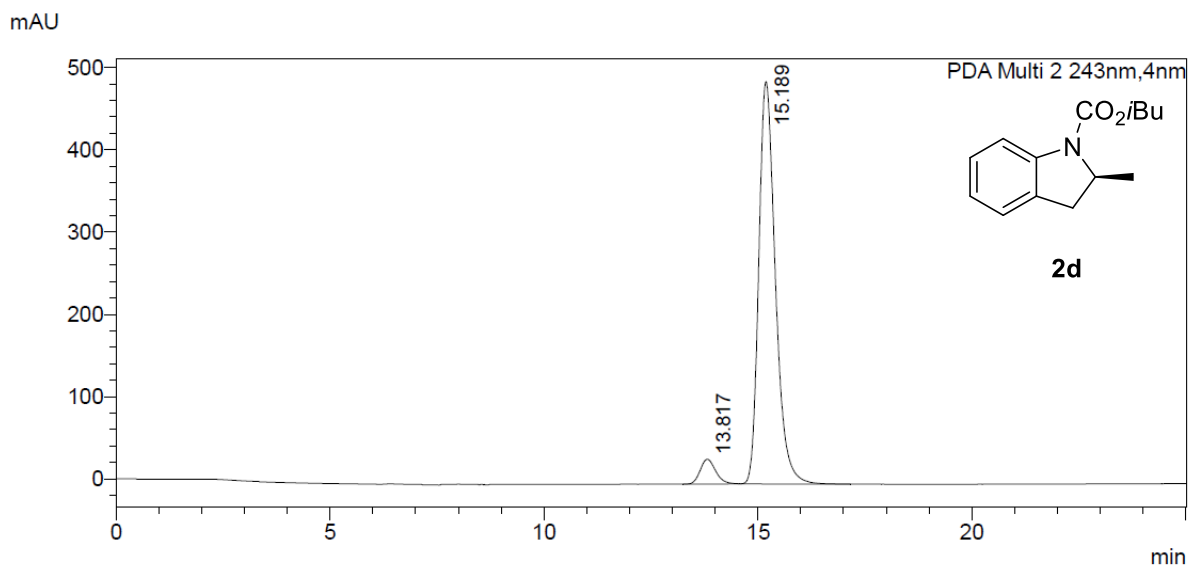

<Peak Table>

PDA Ch2 243nm

| Peak# | Ret. Time | Area     | Height | Area%   |
|-------|-----------|----------|--------|---------|
| 1     | 13.817    | 757360   | 30144  | 5.428   |
| 2     | 15.189    | 13195955 | 488695 | 94.572  |
| Total |           | 13953315 | 518839 | 100.000 |

$^1\text{H}$  NMR,  $\text{CDCl}_3$ , 400 MHz

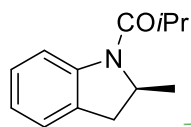

**2e**

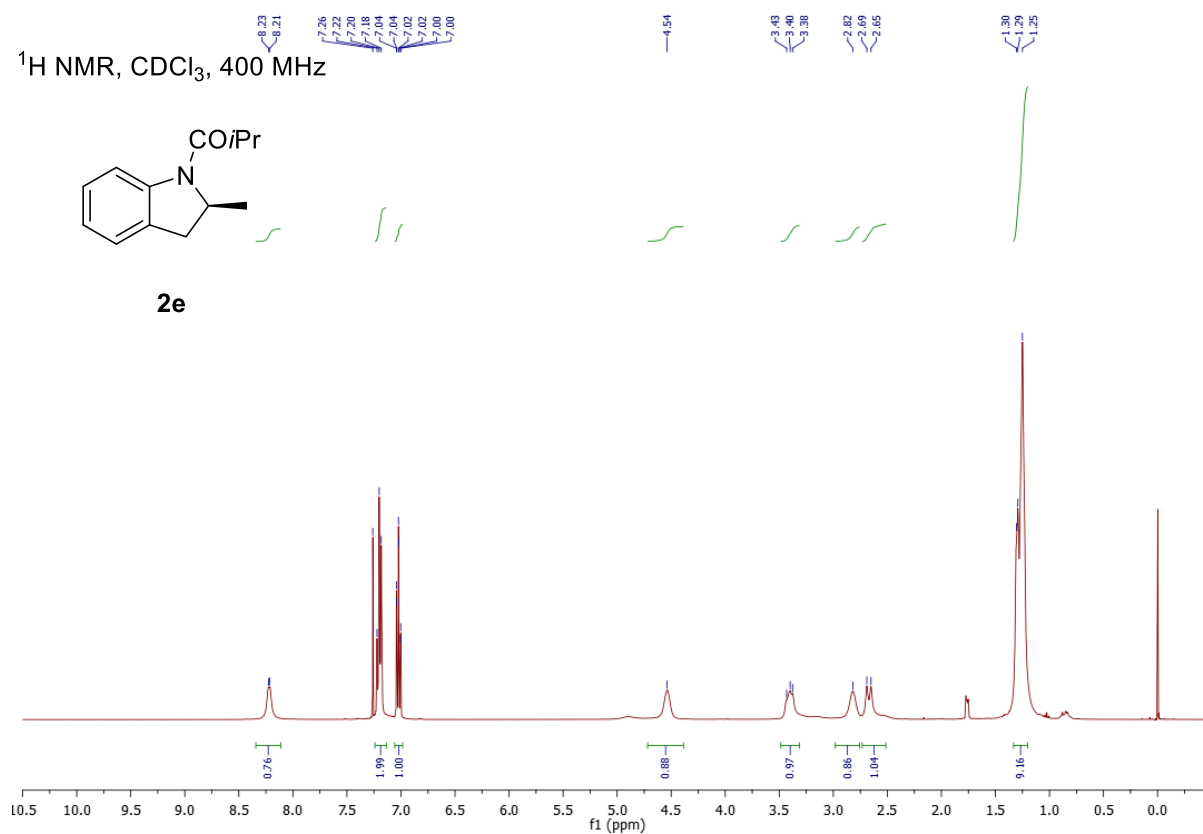

$^{13}\text{C}$  NMR,  $\text{CDCl}_3$ , 101 MHz

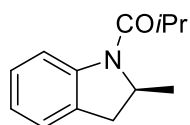

**2e**

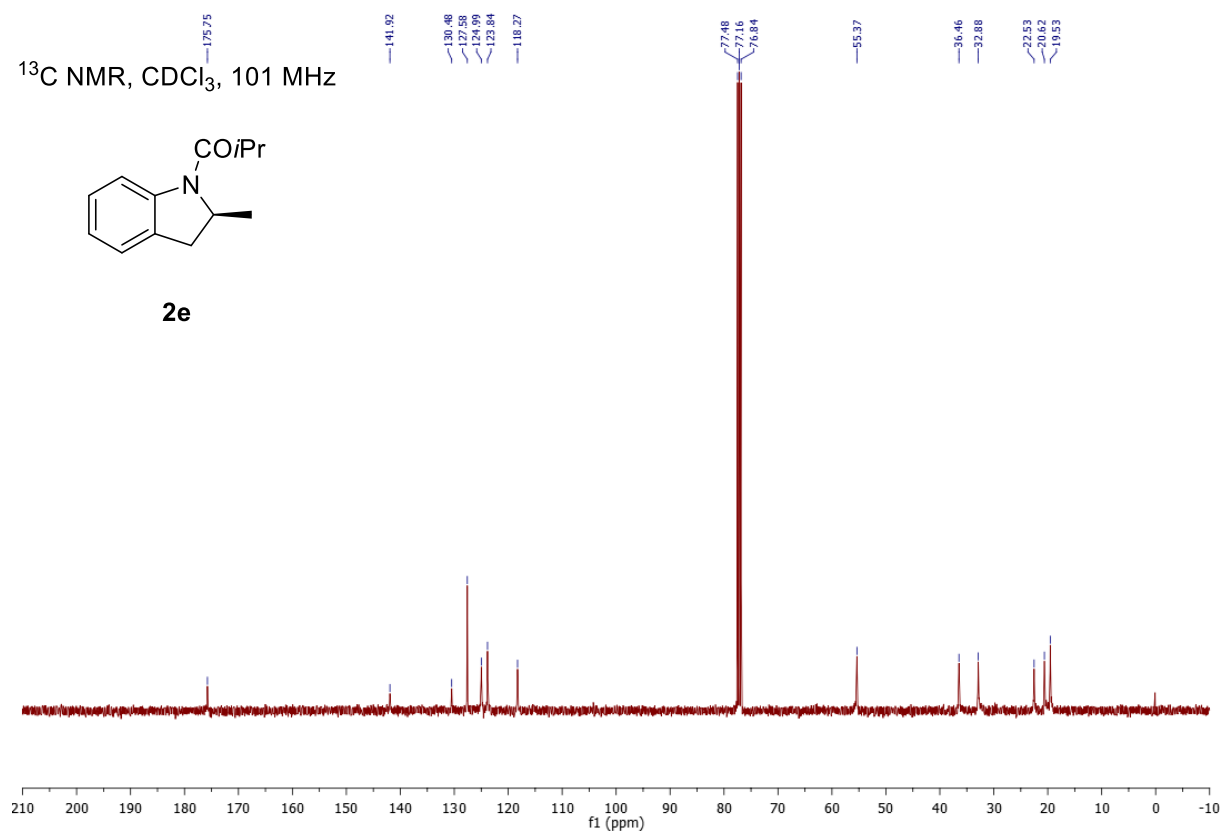

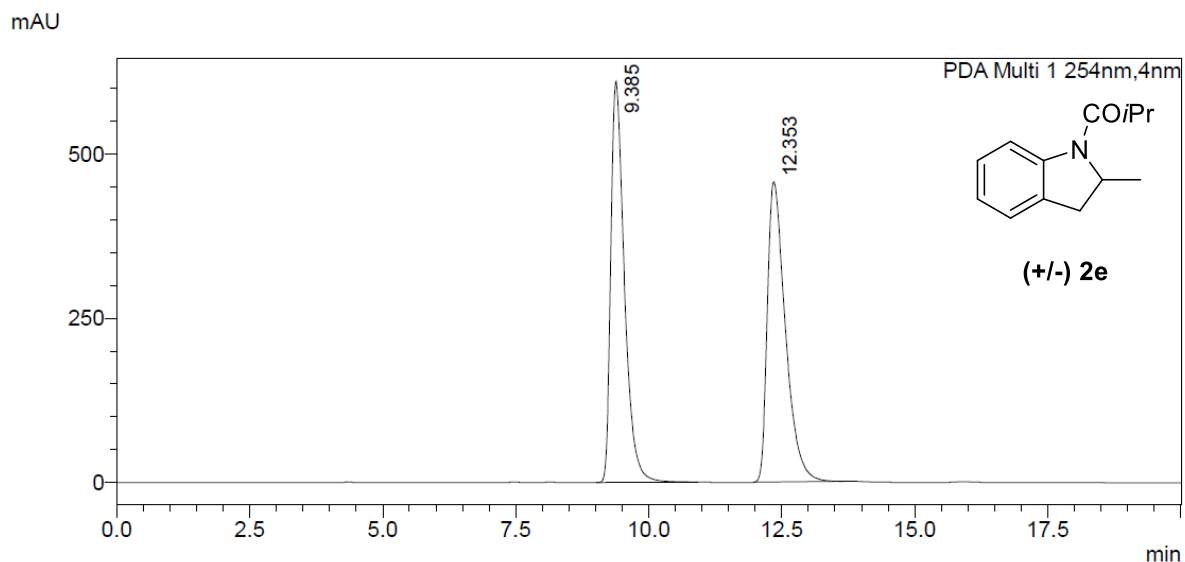

**<Peak Table>**

PDA Ch1 254nm

| Peak# | Ret. Time | Area     | Height  | Area%   |
|-------|-----------|----------|---------|---------|
| 1     | 9.385     | 10875515 | 611160  | 50.149  |
| 2     | 12.353    | 10810916 | 457455  | 49.851  |
| Total |           | 21686431 | 1068615 | 100.000 |

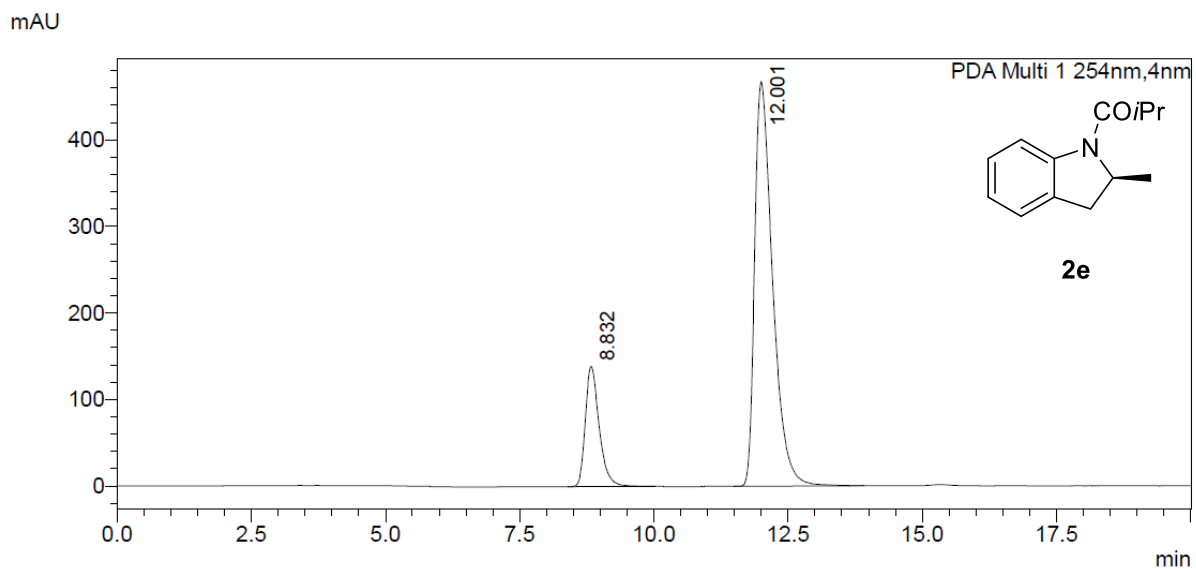

**<Peak Table>**

PDA Ch1 254nm

| Peak# | Ret. Time | Area     | Height | Area%   |
|-------|-----------|----------|--------|---------|
| 1     | 8.832     | 2492245  | 138925 | 18.590  |
| 2     | 12.001    | 10914480 | 467498 | 81.410  |
| Total |           | 13406724 | 606422 | 100.000 |

$^1\text{H}$  NMR,  $\text{CDCl}_3$ , 400 MHz

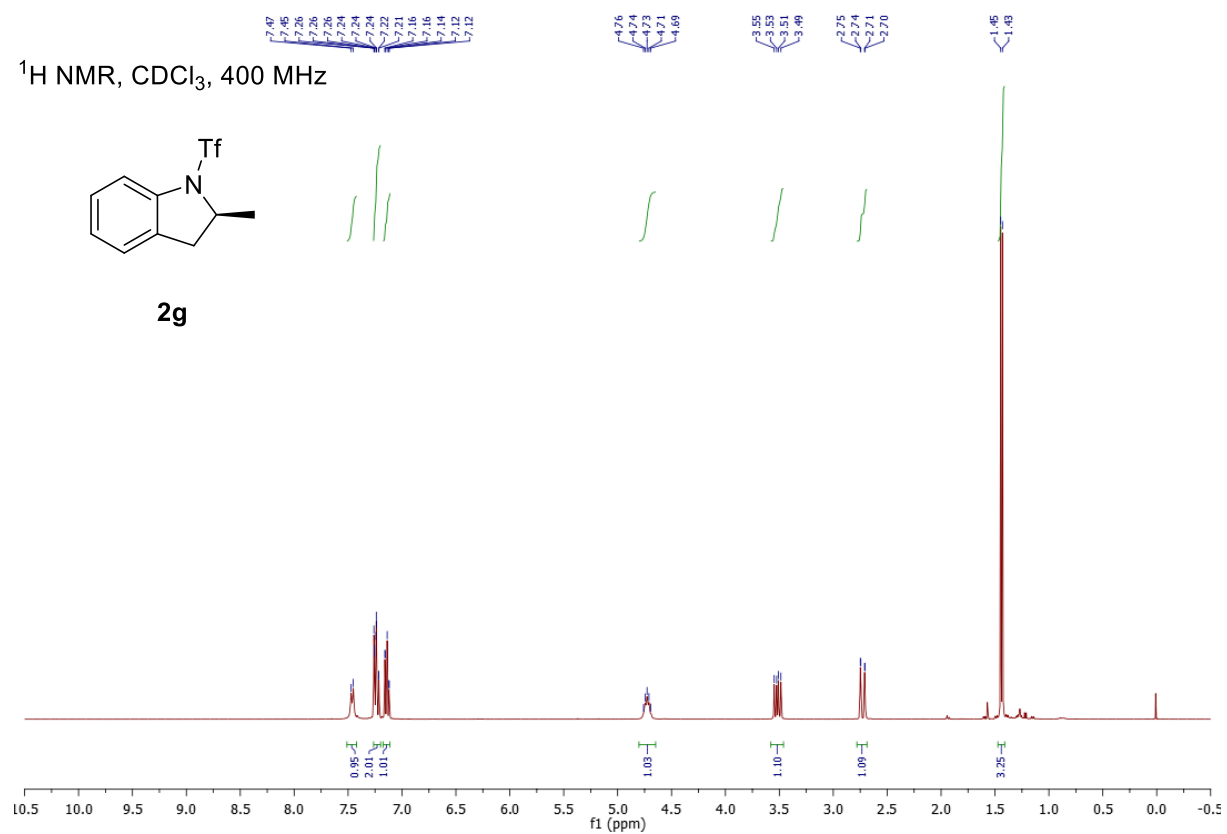

$^{13}\text{C}$  NMR,  $\text{CDCl}_3$ , 101 MHz

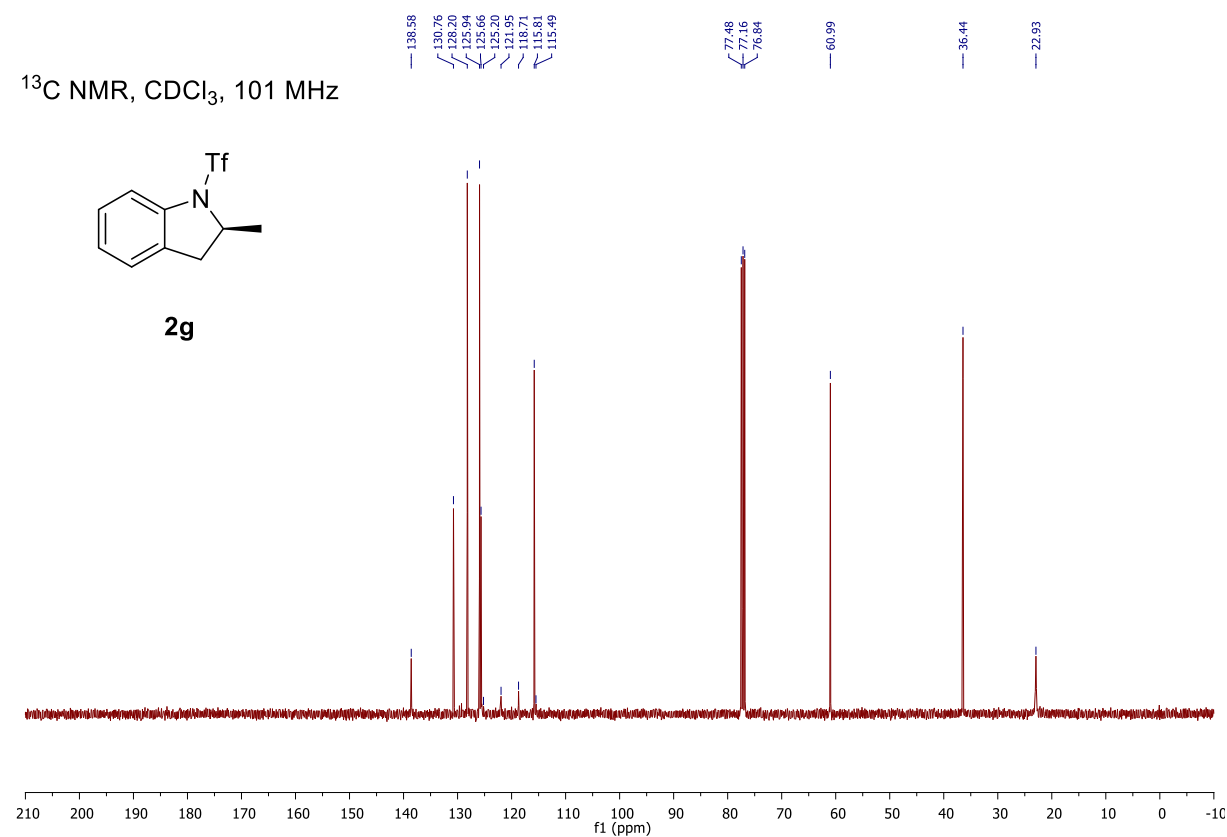

$^{19}\text{F}$  NMR,  $\text{CDCl}_3$ , 376 MHz

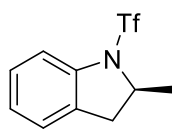

**2g**

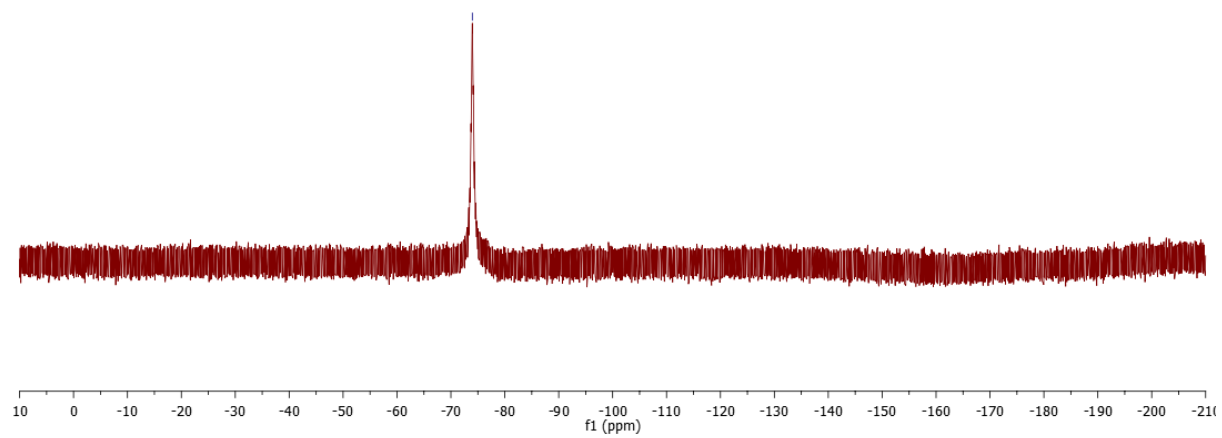

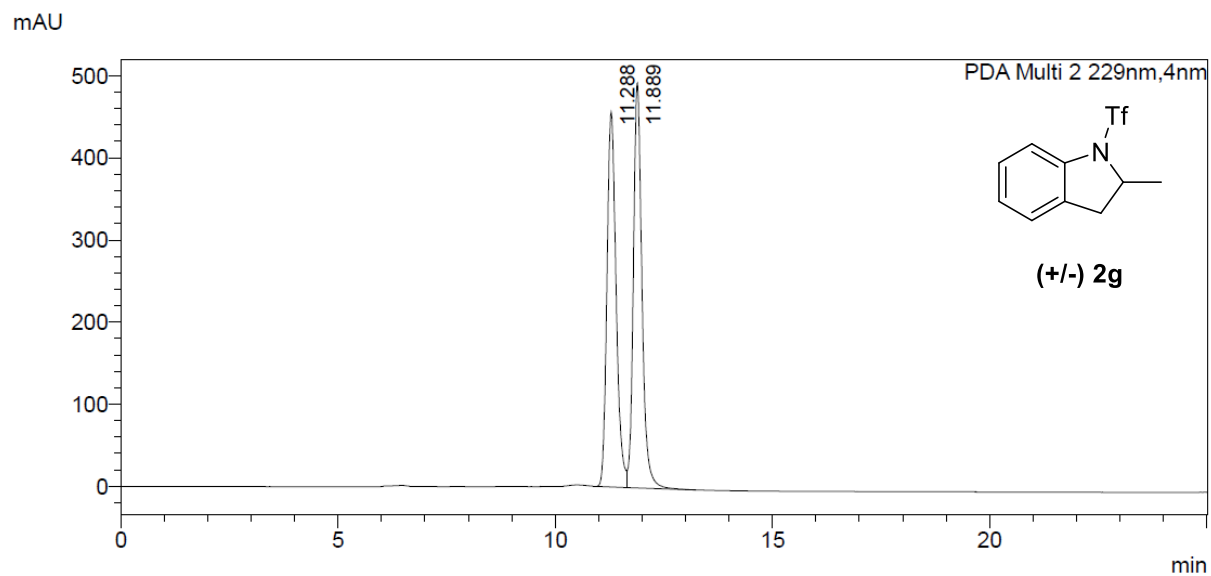

**<Peak Table>**

PDA Ch2 229nm

| Peak# | Ret. Time | Area     | Height | Area%   |
|-------|-----------|----------|--------|---------|
| 1     | 11.288    | 6695079  | 456641 | 49.706  |
| 2     | 11.889    | 6774408  | 493005 | 50.294  |
| Total |           | 13469487 | 949646 | 100.000 |

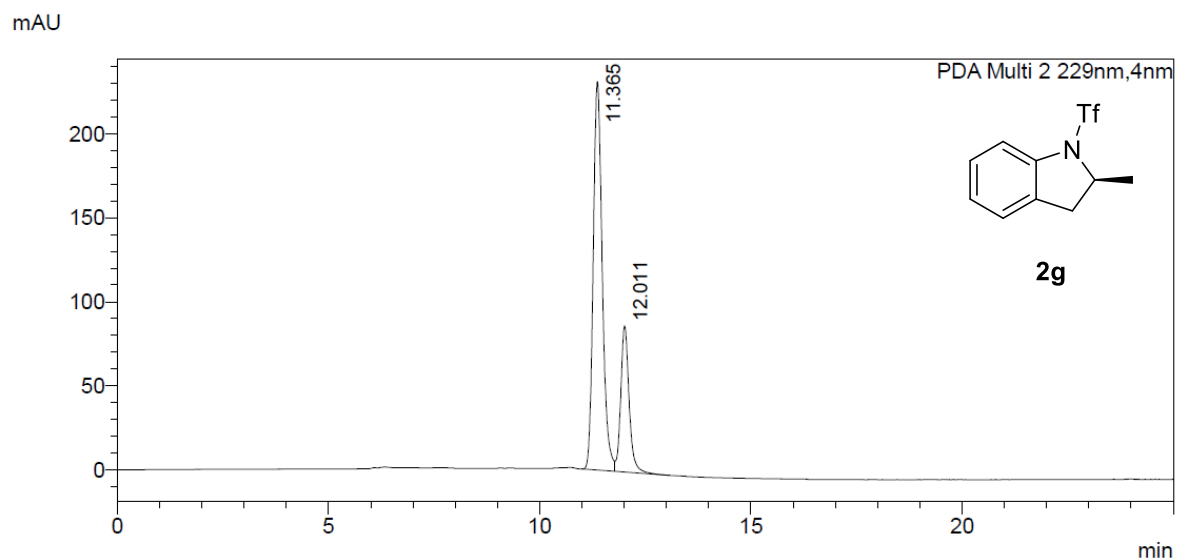

**<Peak Table>**

PDA Ch2 229nm

| Peak# | Ret. Time | Area    | Height | Area%   |
|-------|-----------|---------|--------|---------|
| 1     | 11.365    | 3432550 | 231122 | 74.065  |
| 2     | 12.011    | 1201934 | 86878  | 25.935  |
| Total |           | 4634483 | 318000 | 100.000 |

<sup>1</sup>H NMR, CDCl<sub>3</sub>, 400 MHz

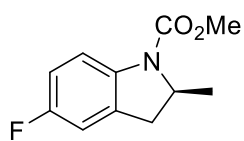

**2h**

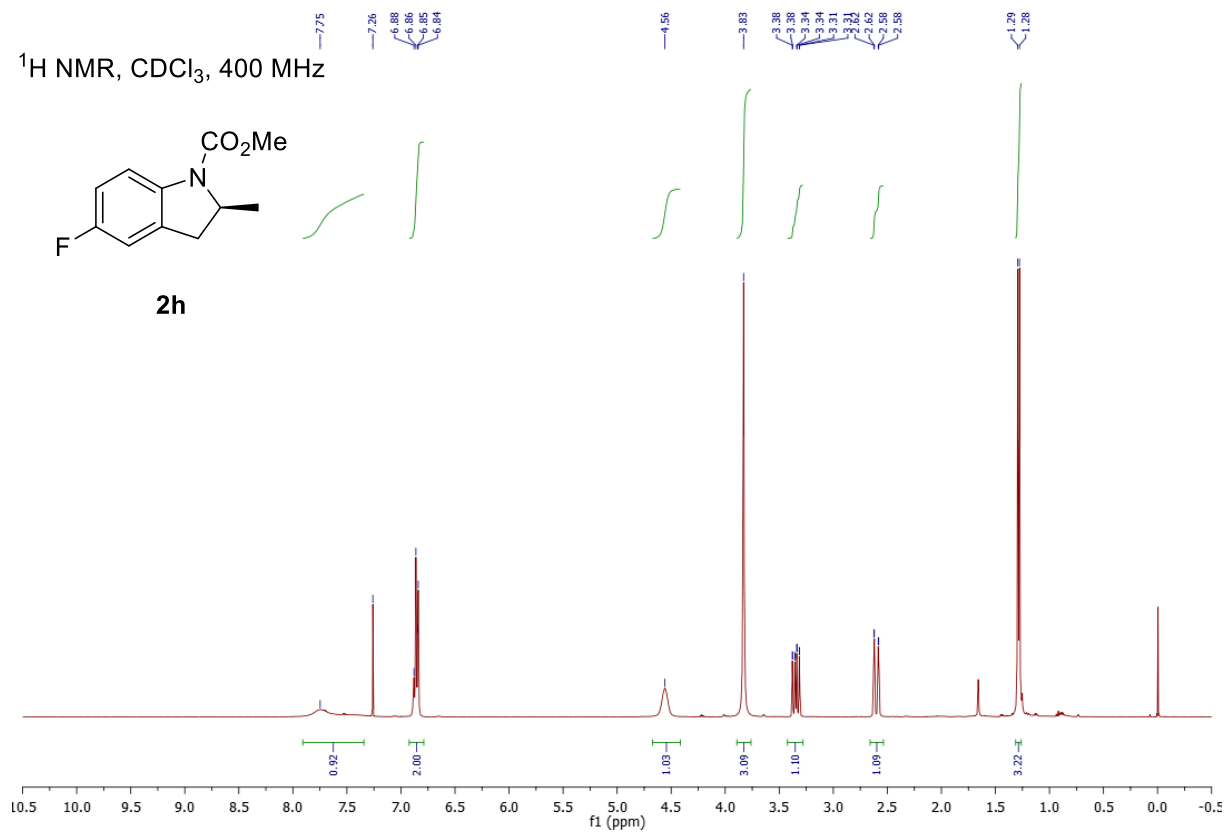

<sup>13</sup>C NMR, CDCl<sub>3</sub>, 101 MHz

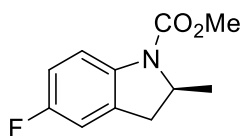

**2h**

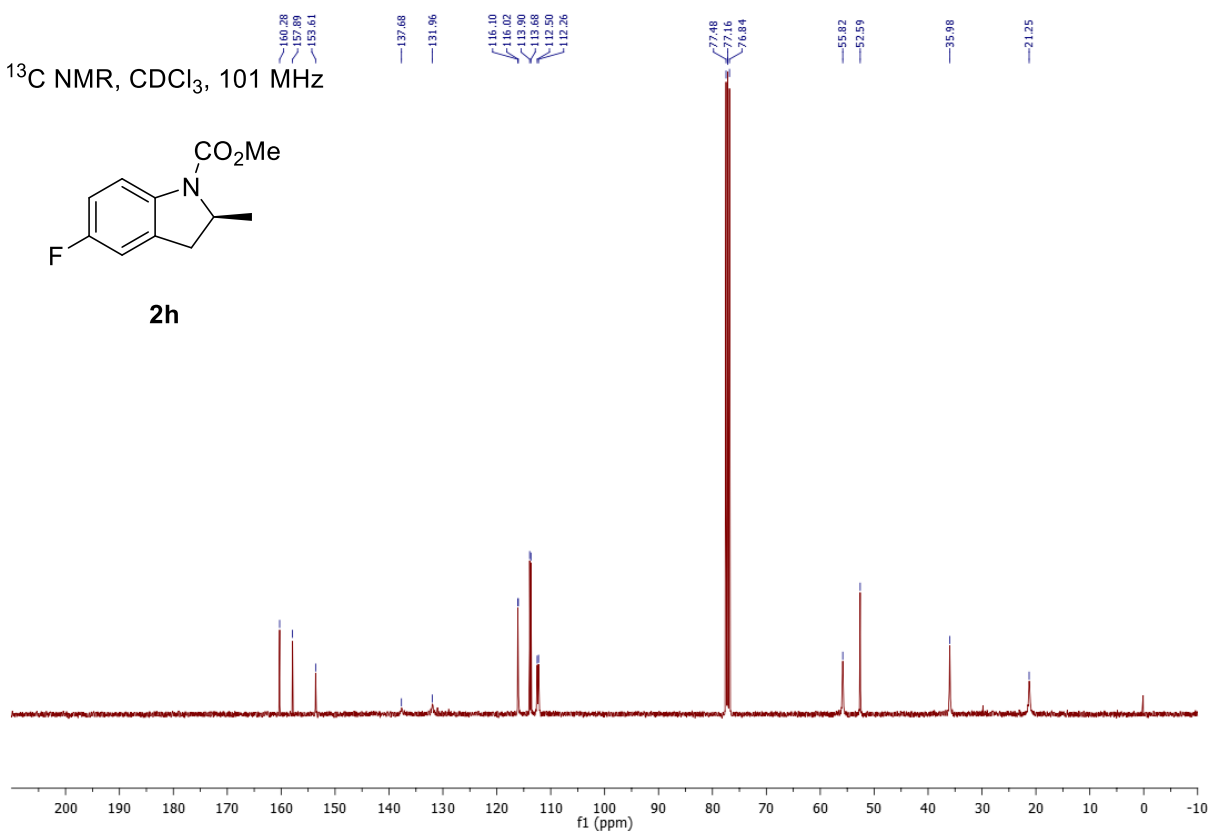

$^{19}\text{F}$  NMR,  $\text{CDCl}_3$ , 376 MHz

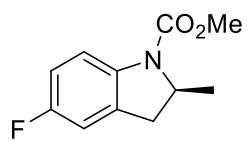

**2h**

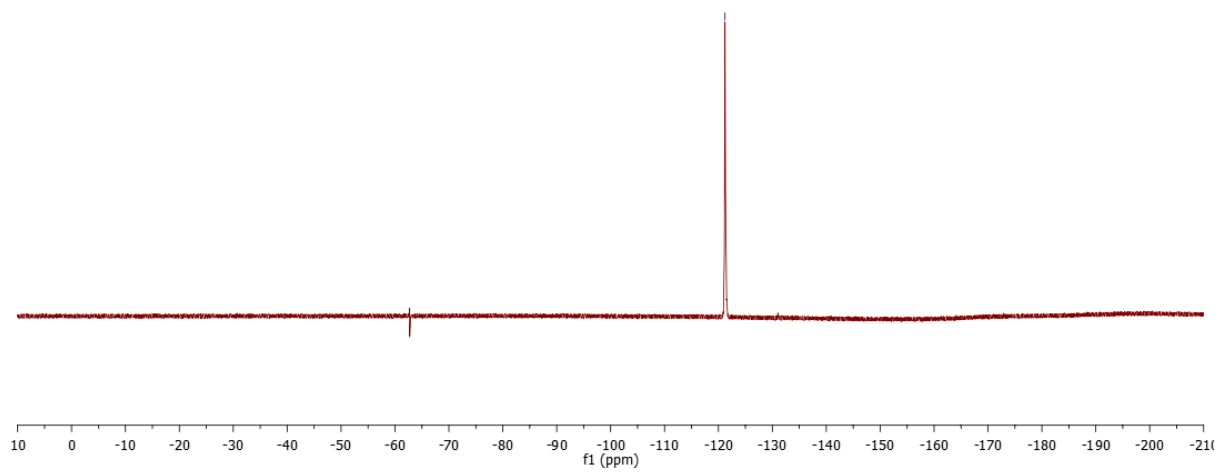



mAU

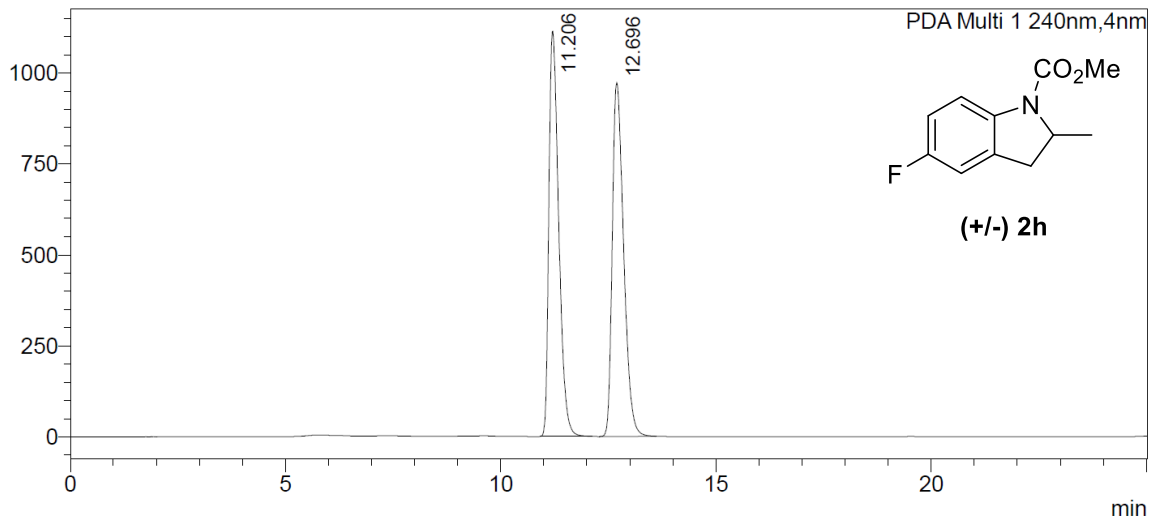

<Peak Table>

PDA Ch1 240nm

| Peak# | Ret. Time | Area     | Height  | Area%   |
|-------|-----------|----------|---------|---------|
| 1     | 11.206    | 17693224 | 1113742 | 49.793  |
| 2     | 12.696    | 17840493 | 972153  | 50.207  |
| Total |           | 35533718 | 2085895 | 100.000 |

mAU

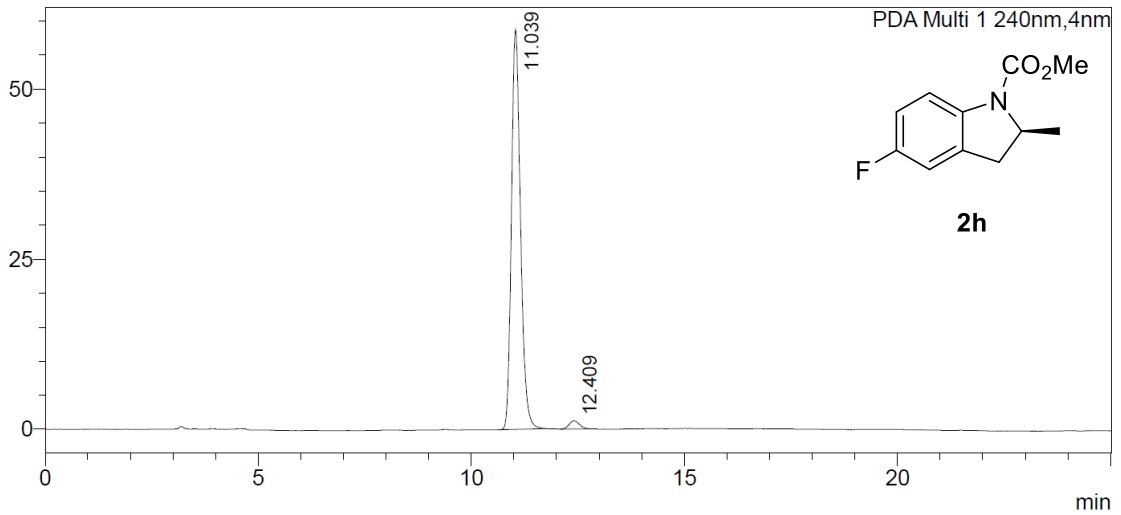

<Peak Table>

PDA Ch1 240nm

| Peak# | Ret. Time | Area   | Height | Area%   |
|-------|-----------|--------|--------|---------|
| 1     | 11.039    | 870376 | 58780  | 97.663  |
| 2     | 12.409    | 20832  | 1218   | 2.337   |
| Total |           | 891207 | 59998  | 100.000 |

<sup>1</sup>H NMR, CDCl<sub>3</sub>, 400 MHz

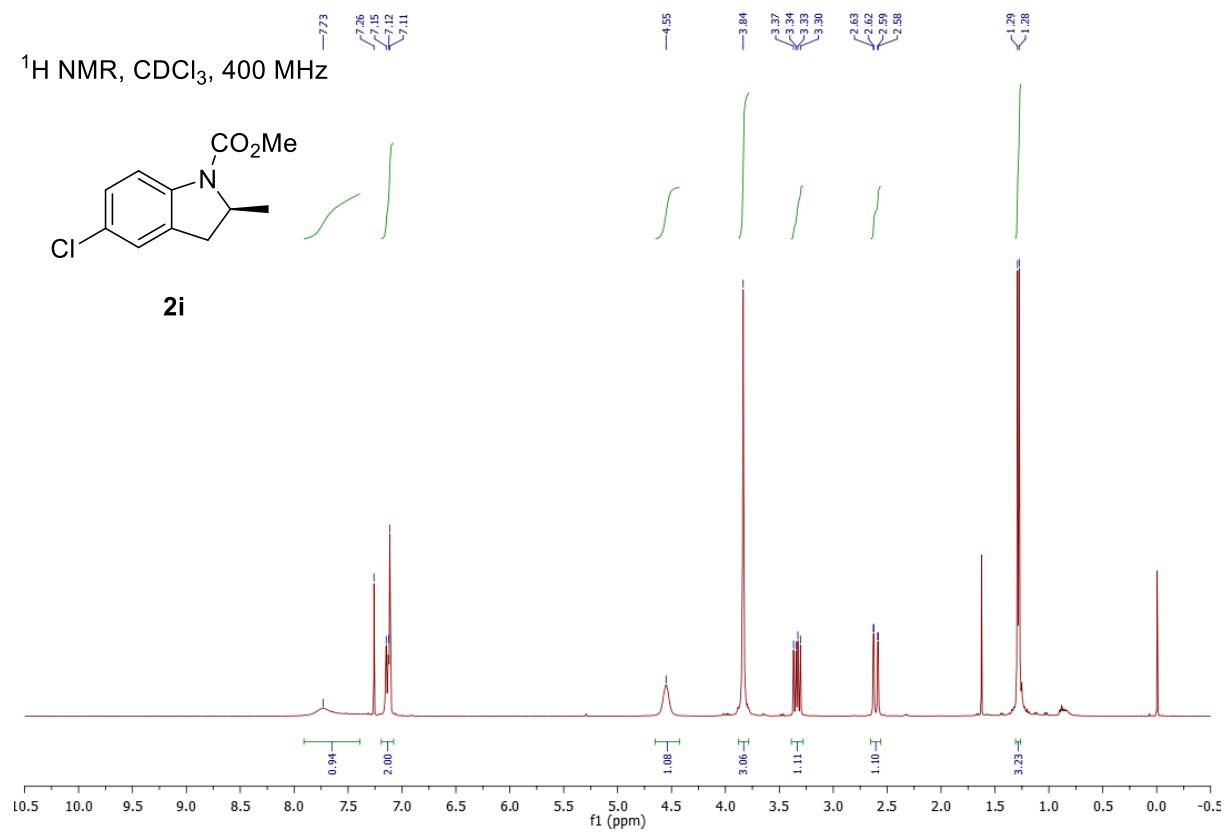

<sup>13</sup>C NMR, CDCl<sub>3</sub>, 101 MHz

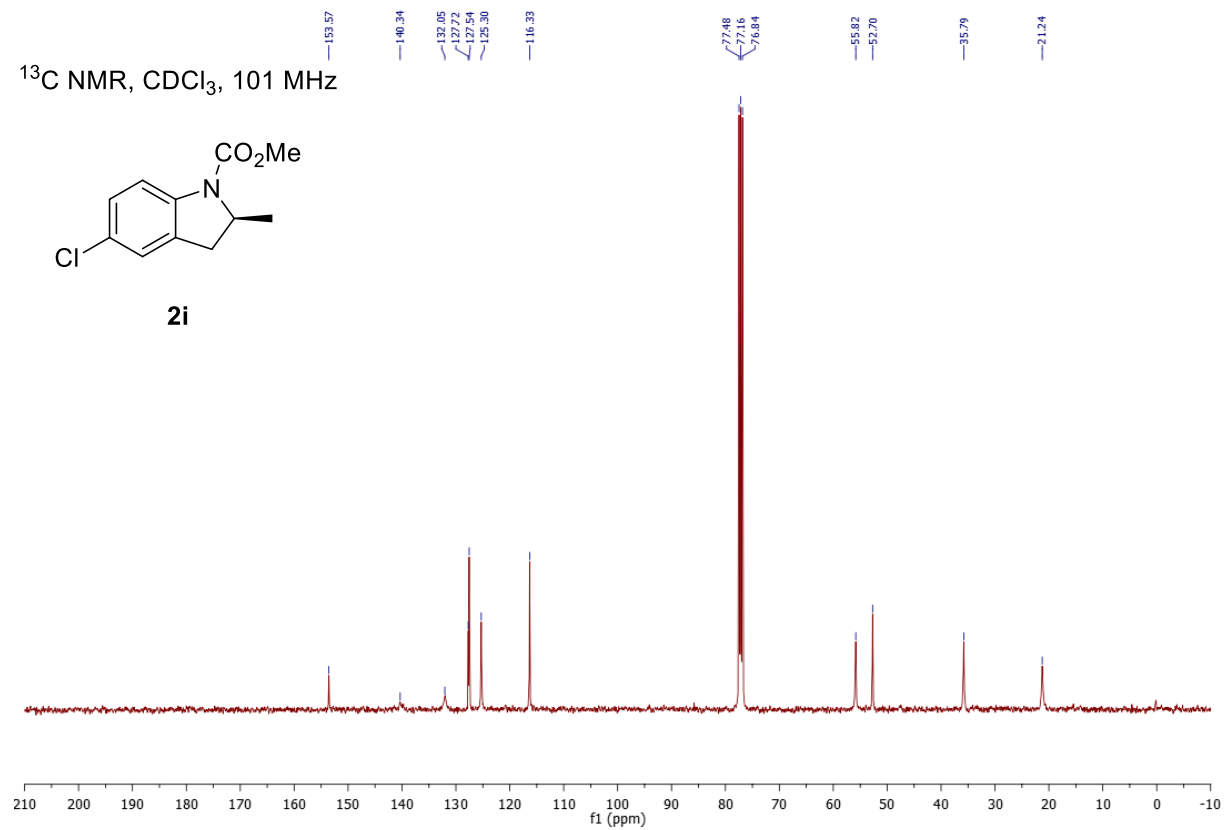

mAU

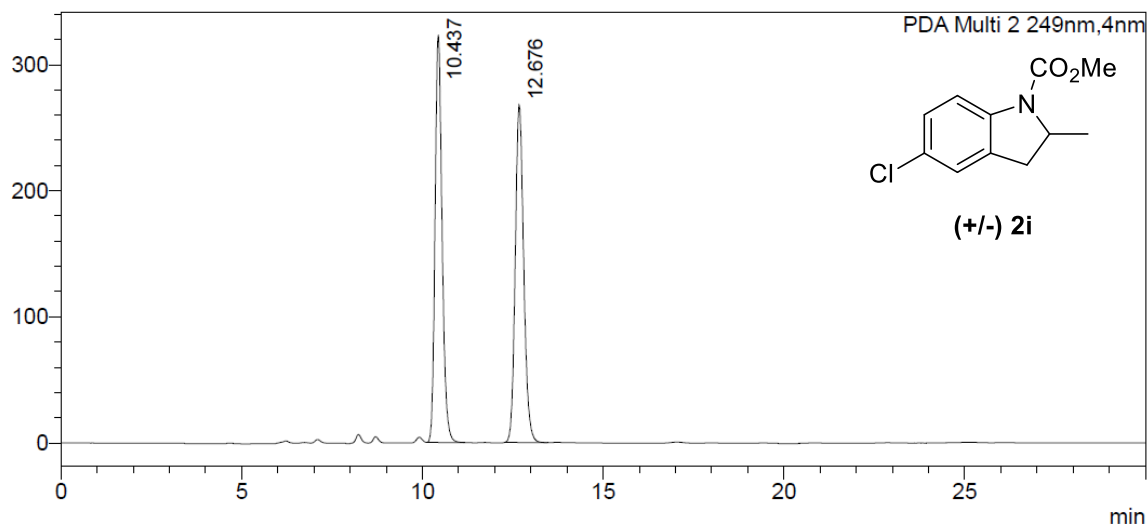

**<Peak Table>**

PDA Ch2 249nm

| Peak# | Ret. Time | Area    | Height | Area%   |
|-------|-----------|---------|--------|---------|
| 1     | 10.437    | 4360101 | 322560 | 49.957  |
| 2     | 12.676    | 4367691 | 267644 | 50.043  |
| Total |           | 8727791 | 590203 | 100.000 |

mAU

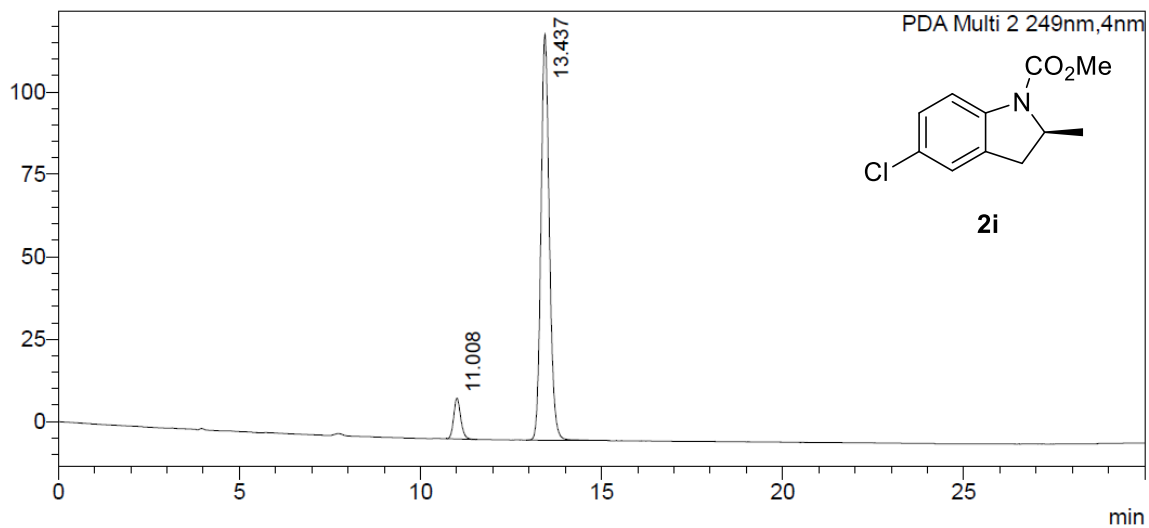

**<Peak Table>**

PDA Ch2 249nm

| Peak# | Ret. Time | Area    | Height | Area%   |
|-------|-----------|---------|--------|---------|
| 1     | 11.008    | 167659  | 12415  | 7.762   |
| 2     | 13.437    | 1992355 | 123055 | 92.238  |
| Total |           | 2160014 | 135470 | 100.000 |

<sup>1</sup>H NMR, CDCl<sub>3</sub>, 400 MHz

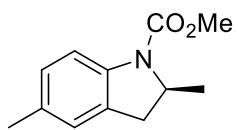

2j

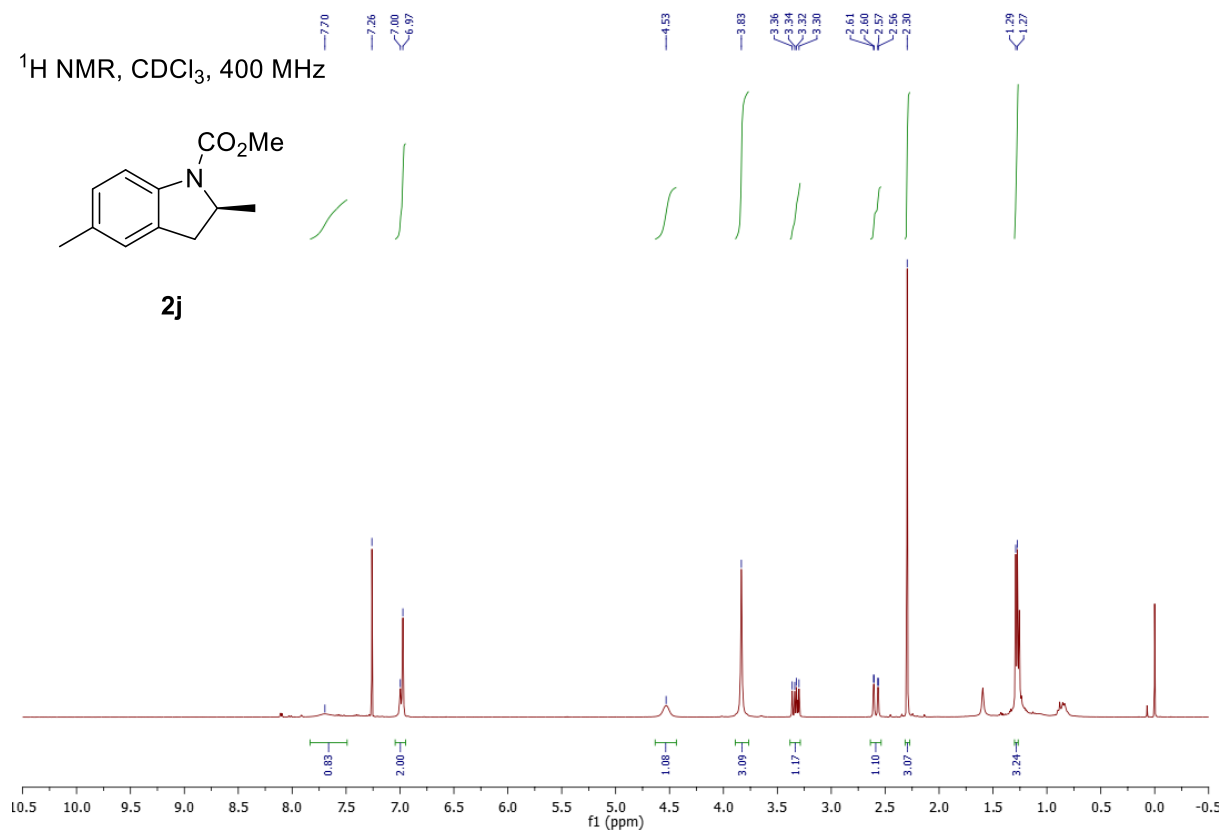

<sup>13</sup>C NMR, CDCl<sub>3</sub>, 101 MHz

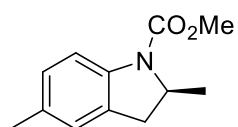

2j

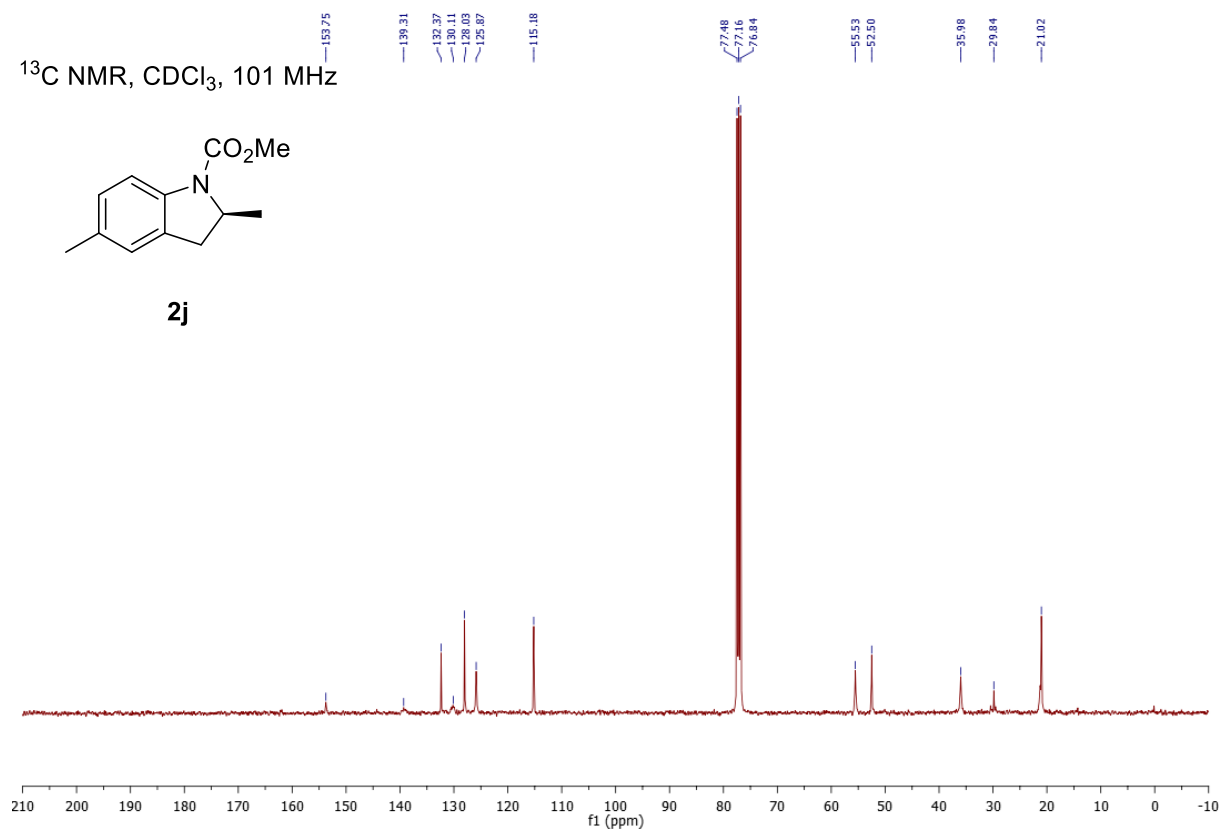

mAU

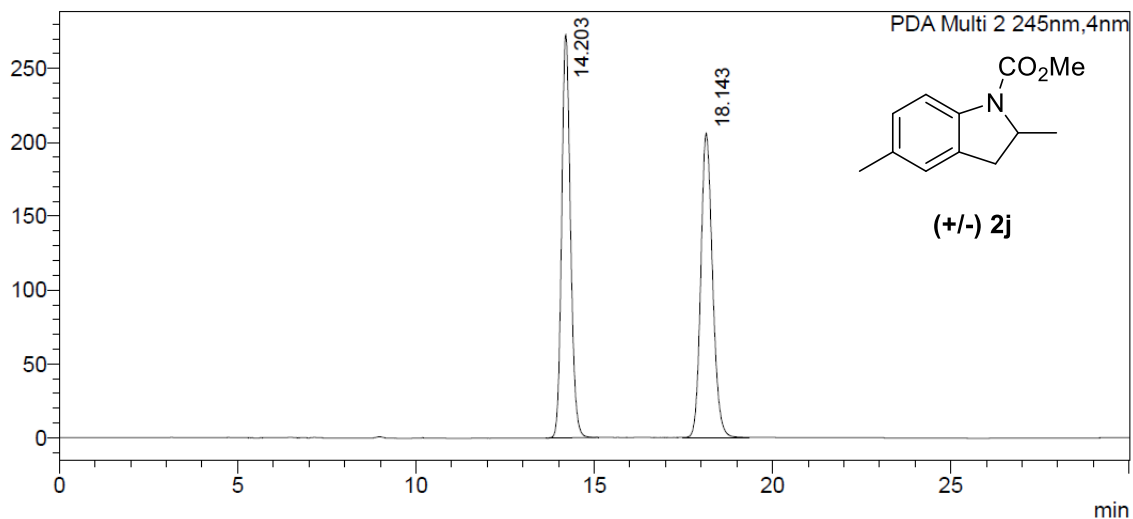

<Peak Table>

PDA Ch2 245nm

| Peak# | Ret. Time | Area    | Height | Area%   |
|-------|-----------|---------|--------|---------|
| 1     | 14.203    | 4700330 | 273014 | 49.947  |
| 2     | 18.143    | 4710359 | 205910 | 50.053  |
| Total |           | 9410688 | 478924 | 100.000 |

mAU

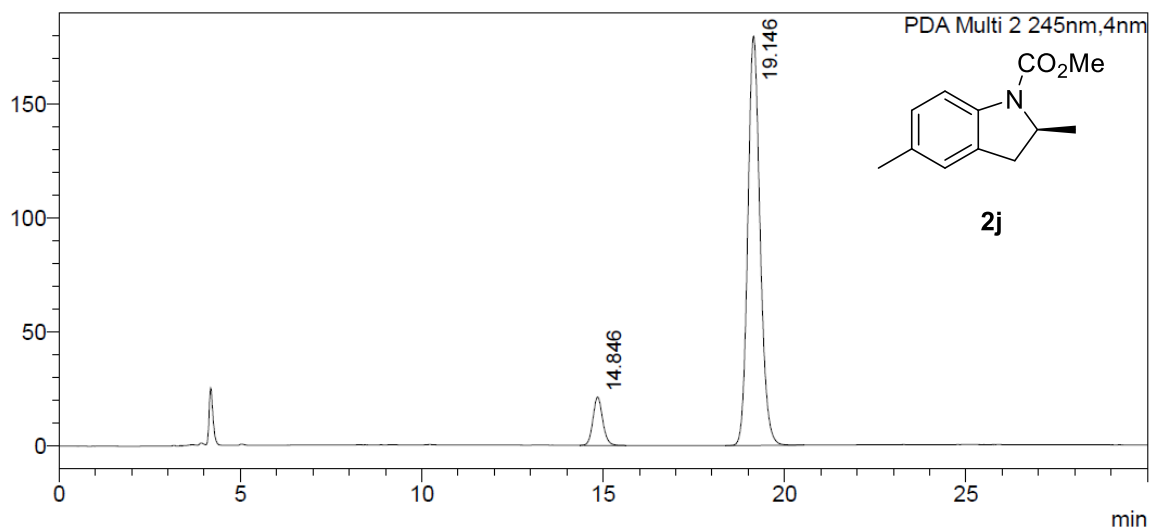

<Peak Table>

PDA Ch2 245nm

| Peak# | Ret. Time | Area    | Height | Area%   |
|-------|-----------|---------|--------|---------|
| 1     | 14.846    | 398759  | 21230  | 8.631   |
| 2     | 19.146    | 4221449 | 179579 | 91.369  |
| Total |           | 4620207 | 200809 | 100.000 |

$^1\text{H}$  NMR,  $\text{CDCl}_3$ , 400 MHz

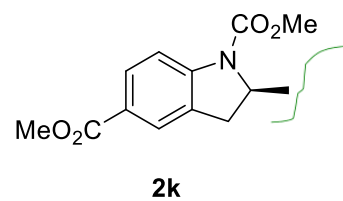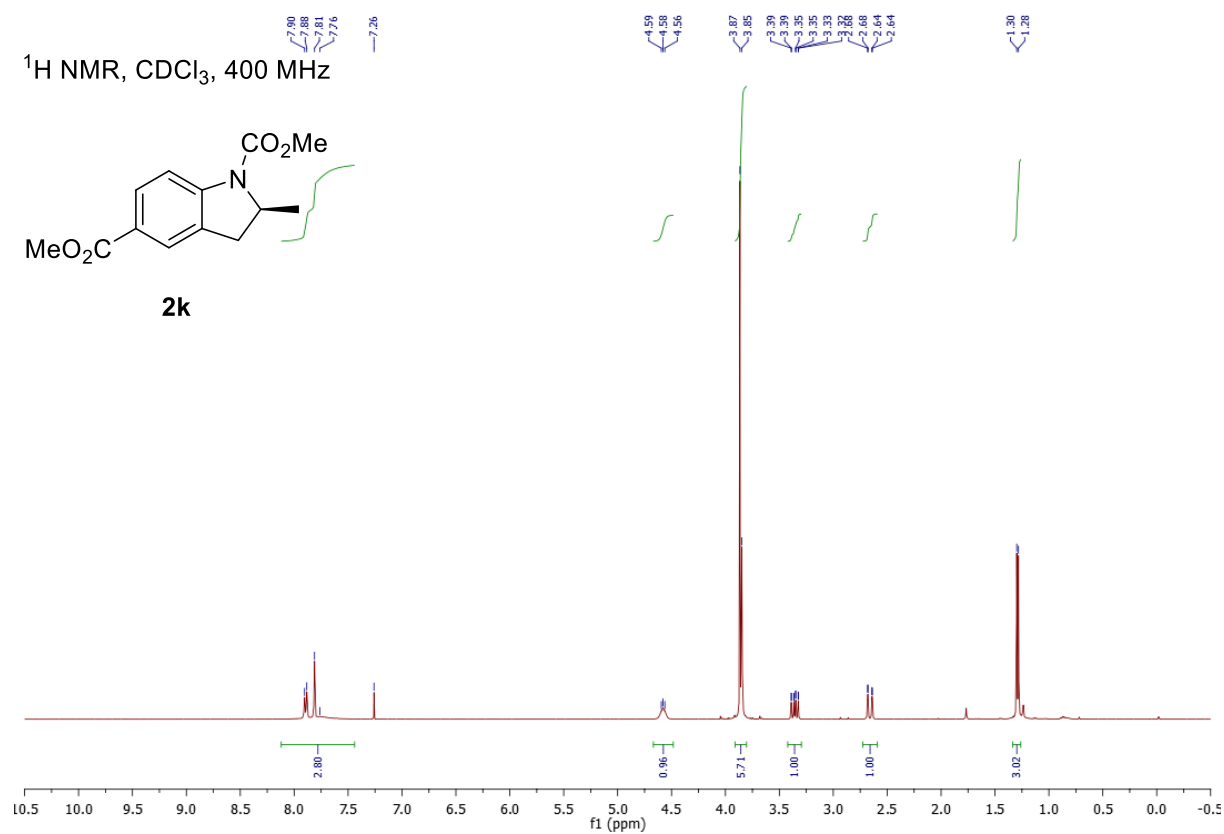

$^{13}\text{C}$  NMR,  $\text{CDCl}_3$ , 101 MHz

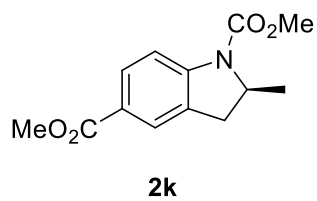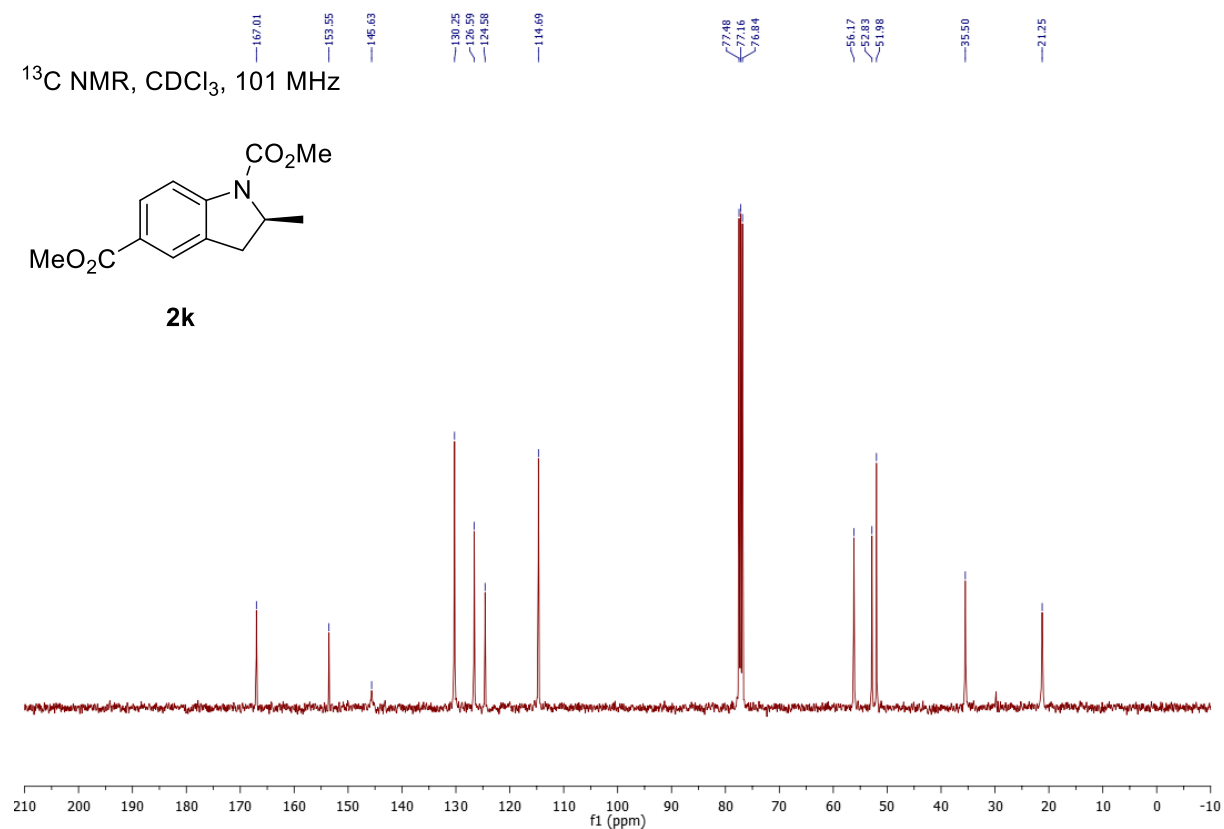

mAU

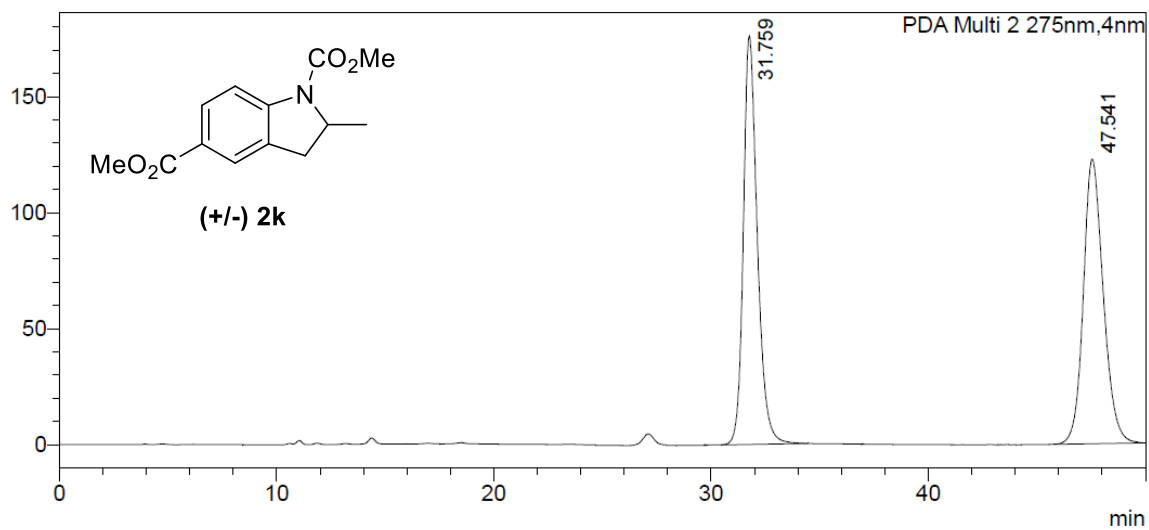

<Peak Table>

PDA Ch2 275nm

| Peak# | Ret. Time | Area     | Height | Area%   |
|-------|-----------|----------|--------|---------|
| 1     | 31.759    | 7867113  | 176070 | 50.102  |
| 2     | 47.541    | 7835040  | 122622 | 49.898  |
| Total |           | 15702153 | 298692 | 100.000 |

mAU

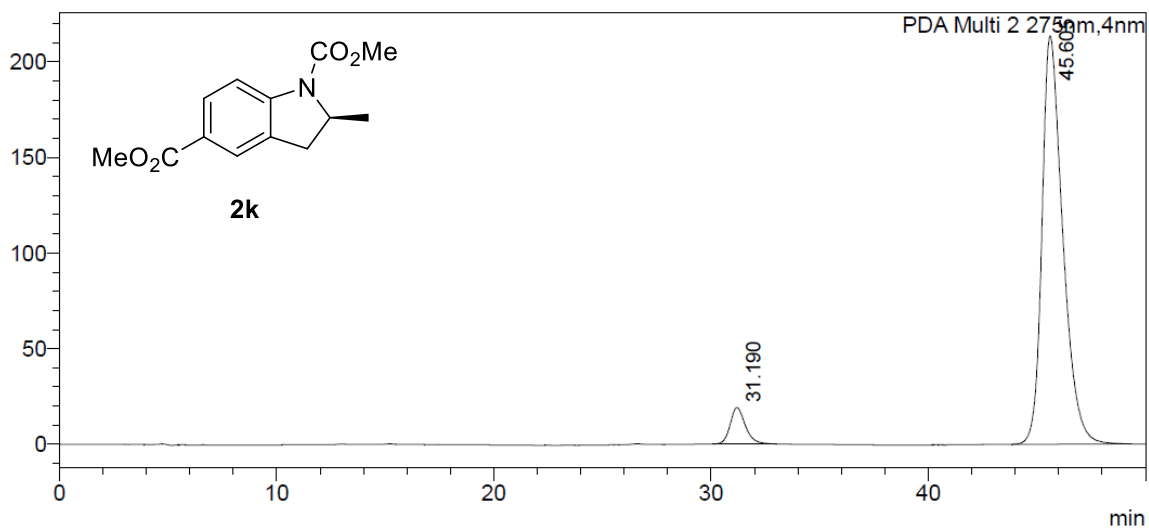

<Peak Table>

PDA Ch2 275nm

| Peak# | Ret. Time | Area     | Height | Area%   |
|-------|-----------|----------|--------|---------|
| 1     | 31.190    | 933992   | 19138  | 6.164   |
| 2     | 45.605    | 14218564 | 213398 | 93.836  |
| Total |           | 15152557 | 232536 | 100.000 |

<sup>1</sup>H NMR, CDCl<sub>3</sub>, 400 MHz

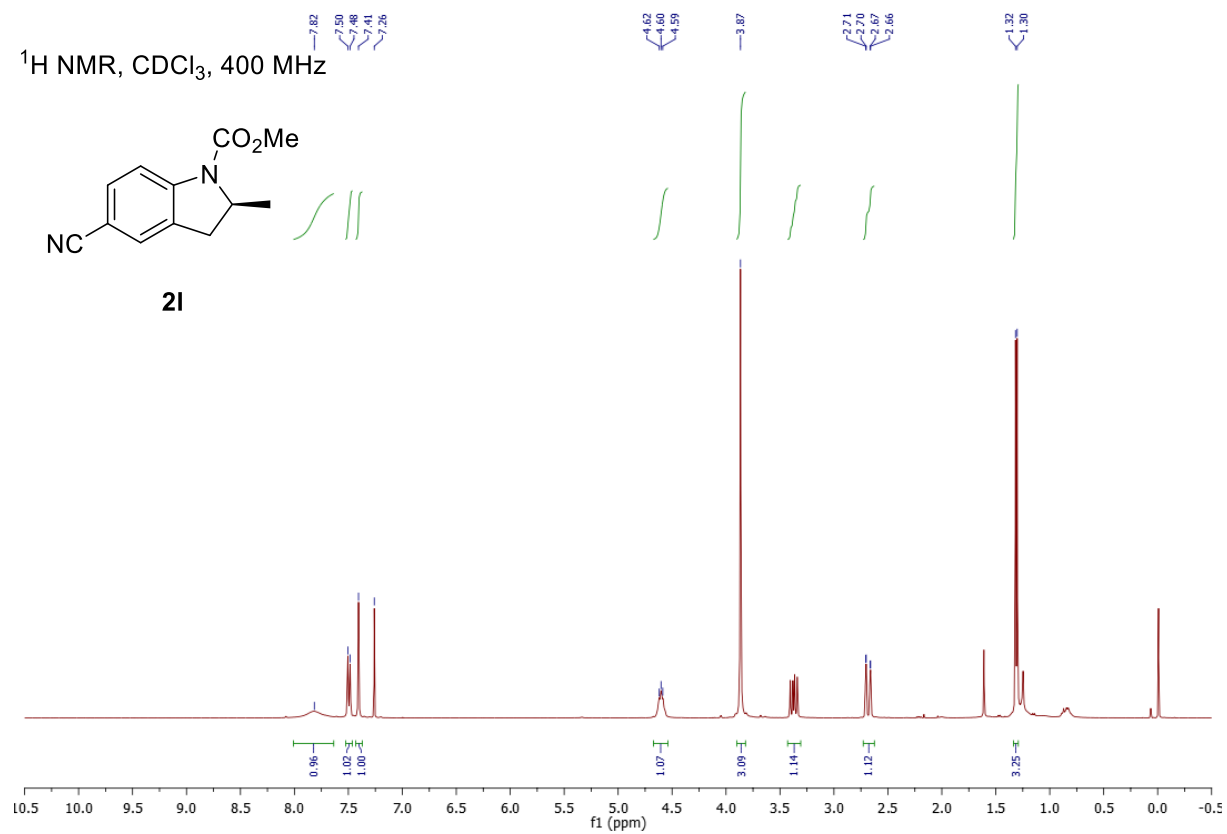

<sup>13</sup>C NMR, CDCl<sub>3</sub>, 101 MHz

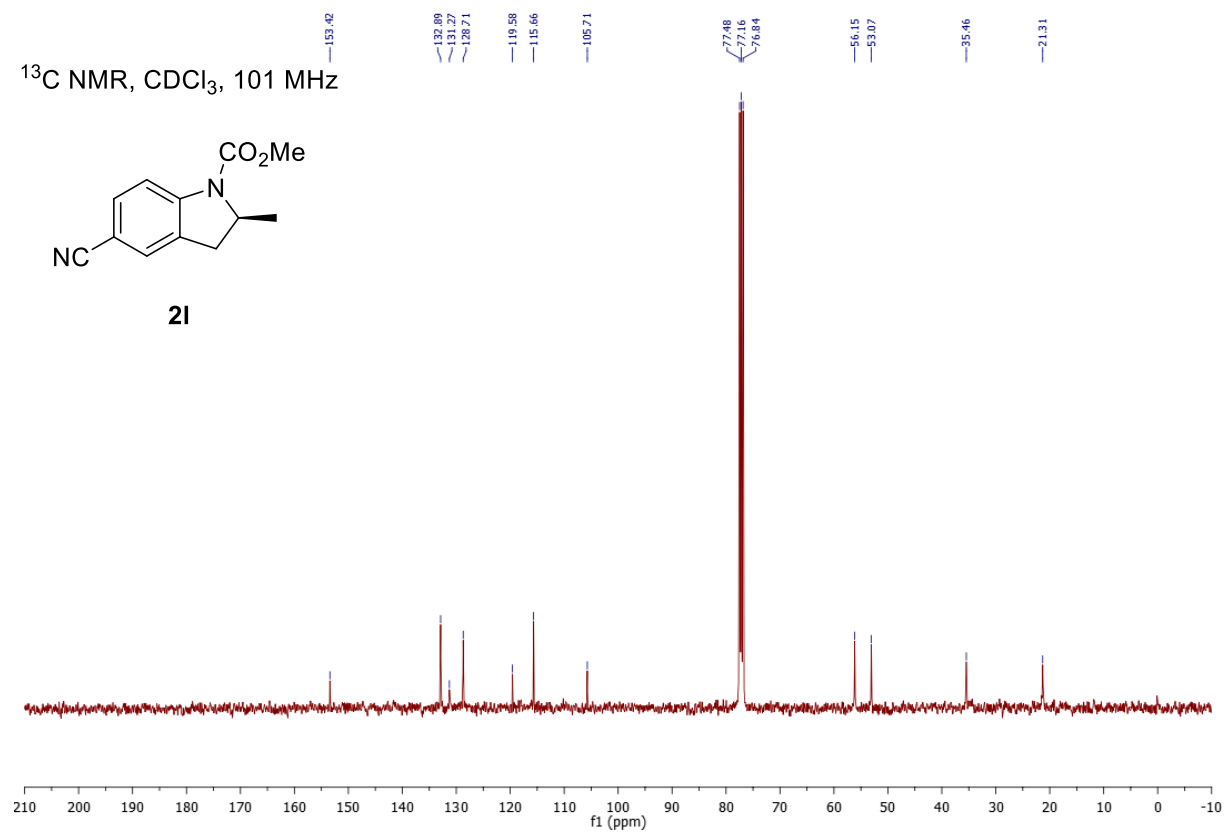



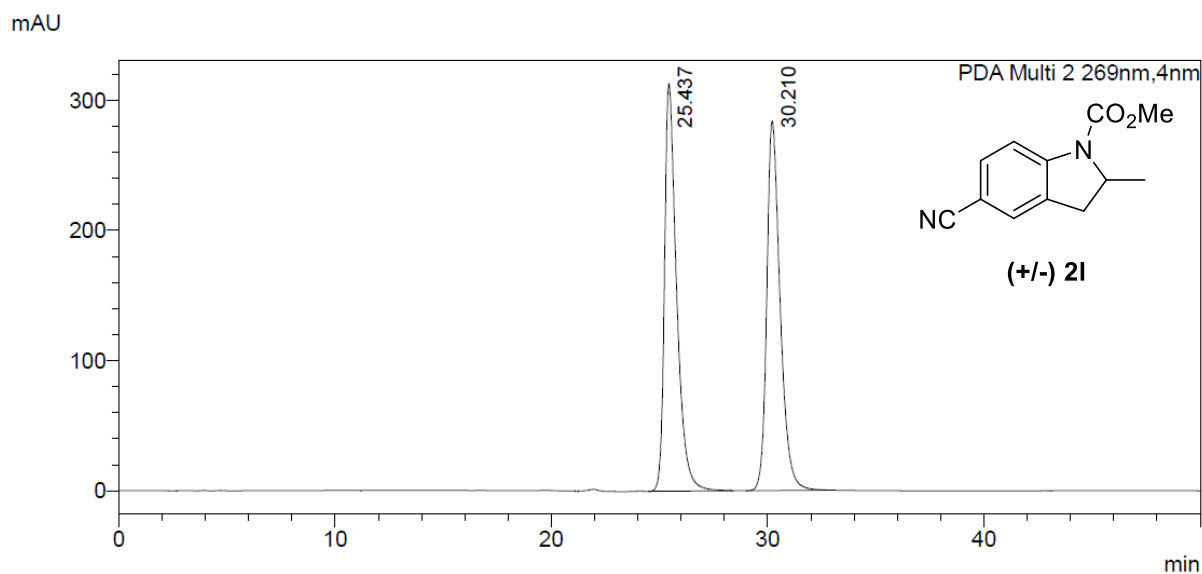

**<Peak Table>**

PDA Ch2 269nm

| Peak# | Ret. Time | Area     | Height | Area%   |
|-------|-----------|----------|--------|---------|
| 1     | 25.437    | 12195863 | 313214 | 50.009  |
| 2     | 30.210    | 12191331 | 284154 | 49.991  |
| Total |           | 24387194 | 597368 | 100.000 |

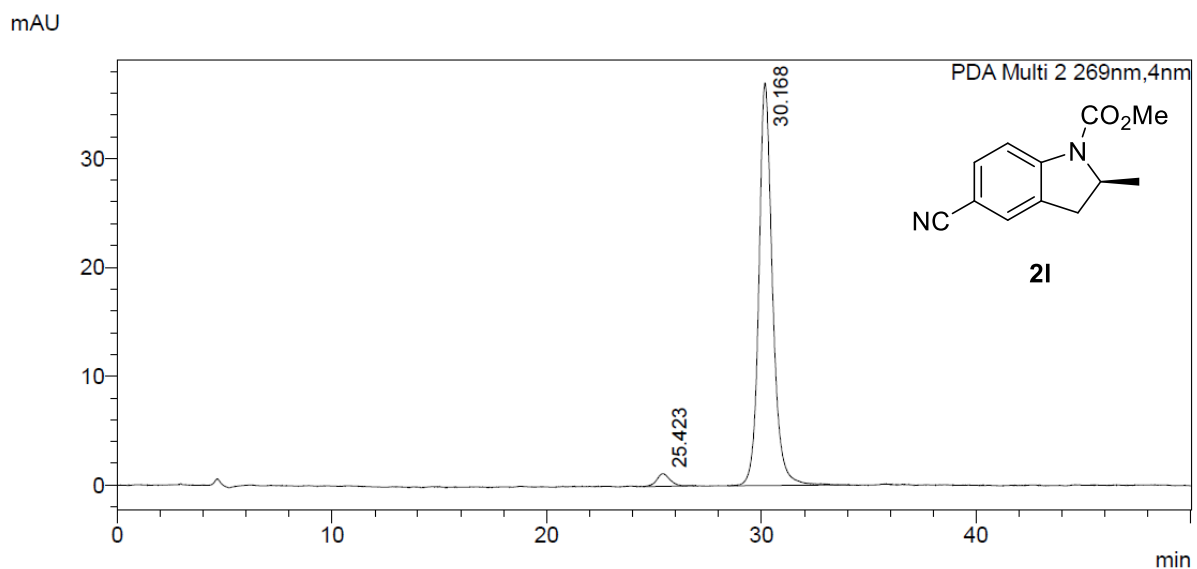

**<Peak Table>**

PDA Ch2 269nm

| Peak# | Ret. Time | Area    | Height | Area%   |
|-------|-----------|---------|--------|---------|
| 1     | 25.423    | 51142   | 1175   | 3.035   |
| 2     | 30.168    | 1634066 | 36960  | 96.965  |
| Total |           | 1685208 | 38135  | 100.000 |

<sup>1</sup>H NMR, CDCl<sub>3</sub>, 400 MHz

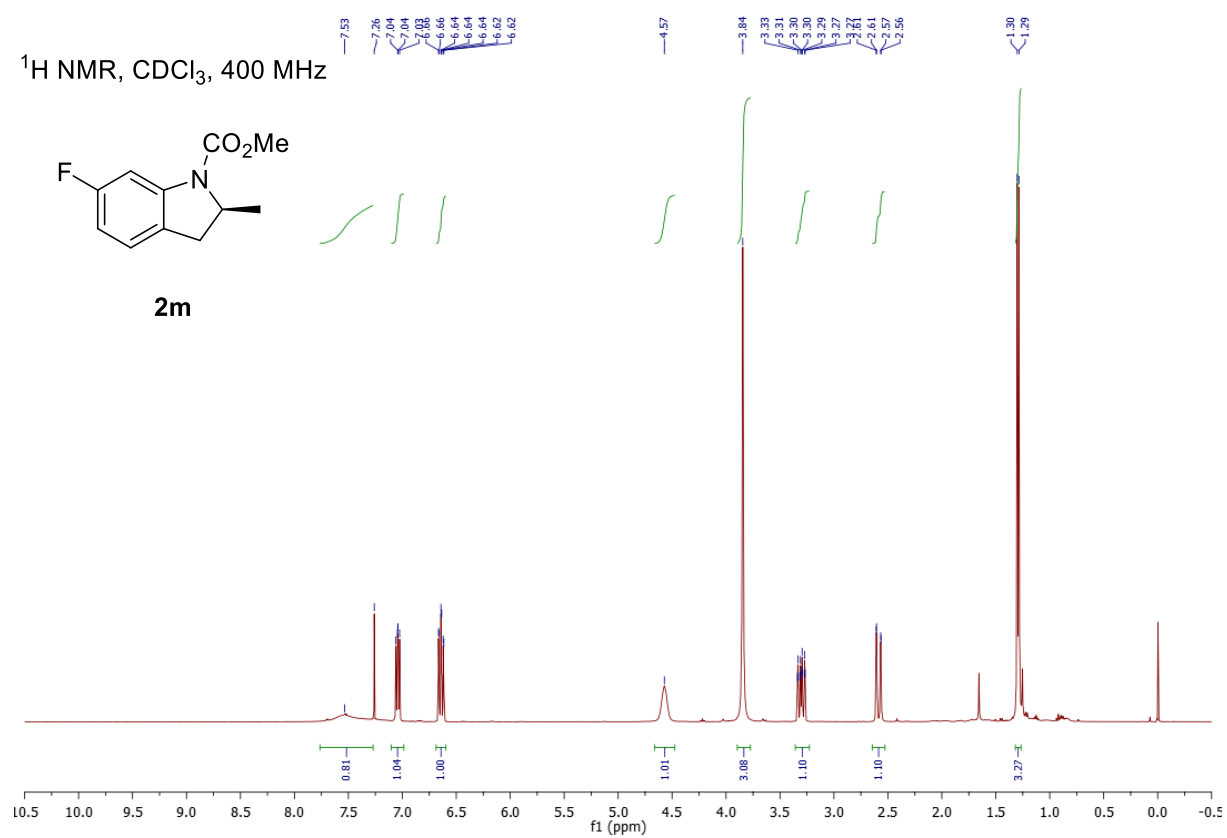

<sup>13</sup>C NMR, CDCl<sub>3</sub>, 101 MHz

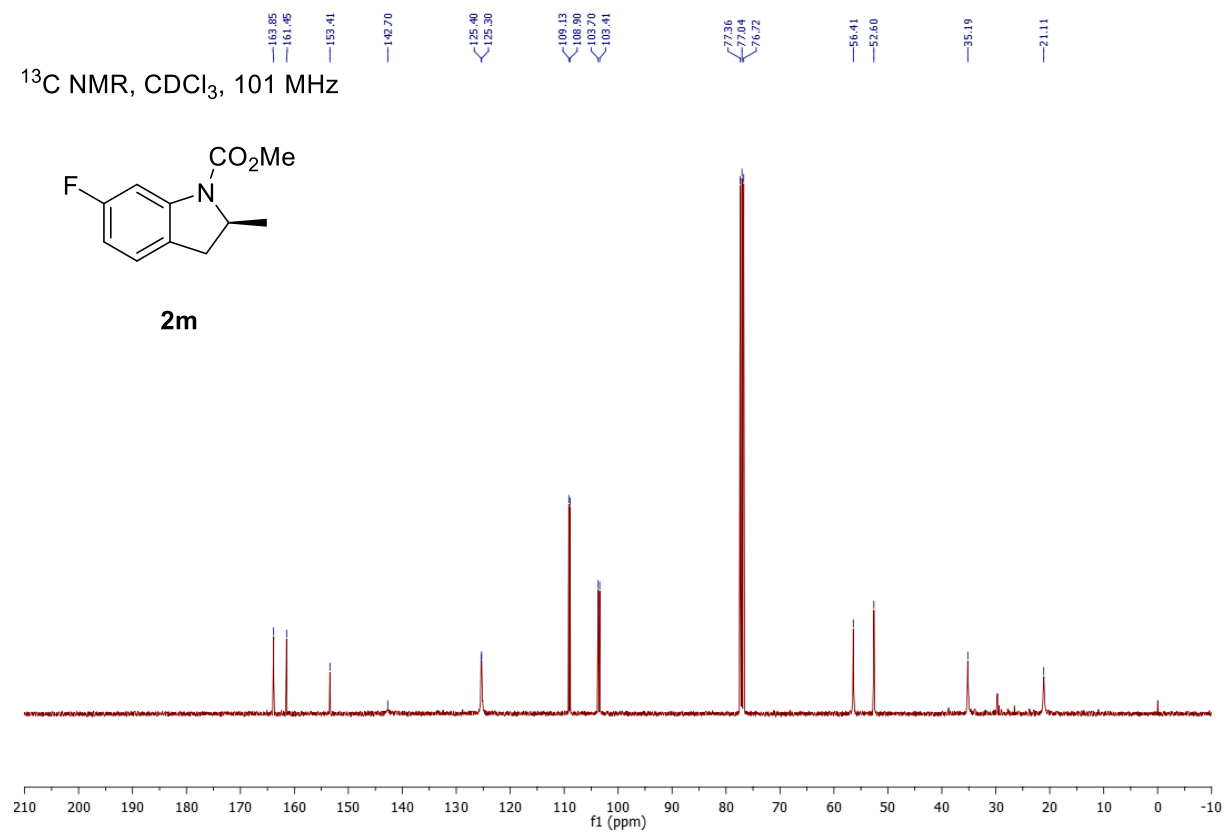

$^{19}\text{F}$  NMR,  $\text{CDCl}_3$ , 376 MHz

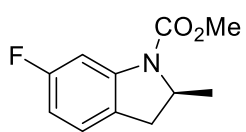

**2m**

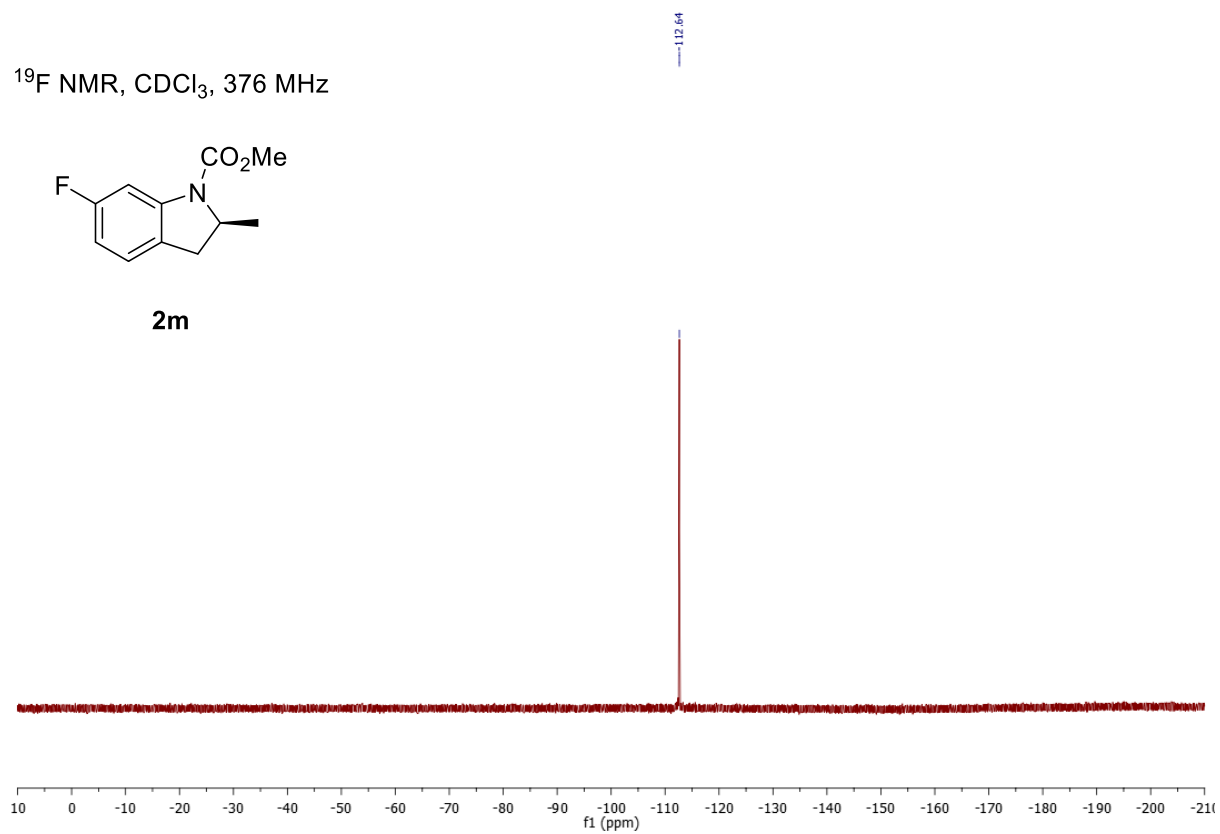

mAU

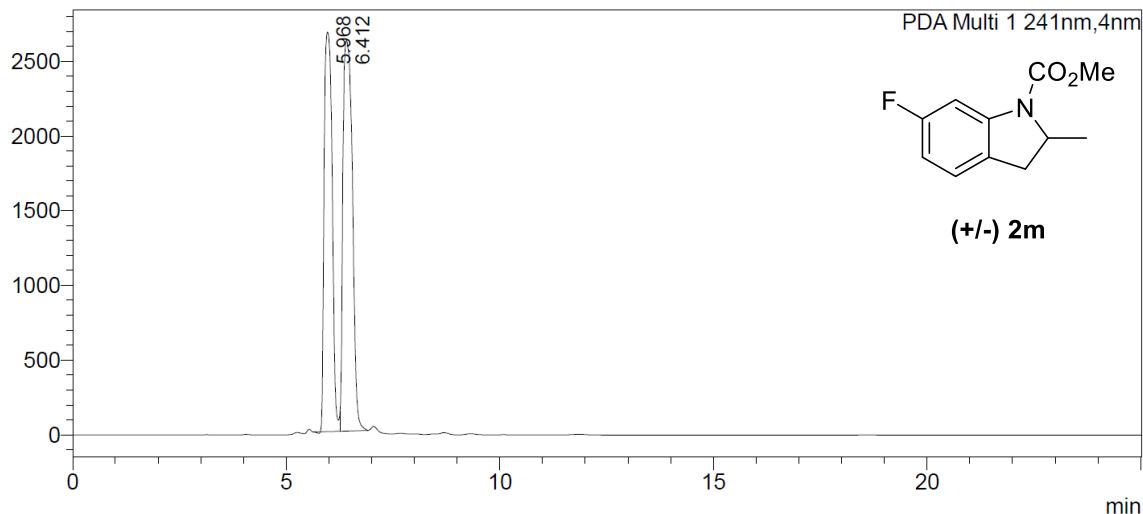

<Peak Table>

PDA Ch1 241nm

| Peak# | Ret. Time | Area     | Height  | Area%   |
|-------|-----------|----------|---------|---------|
| 1     | 5.968     | 34934094 | 2672998 | 46.494  |
| 2     | 6.412     | 40203252 | 2614261 | 53.506  |
| Total |           | 75137346 | 5287258 | 100.000 |

mAU

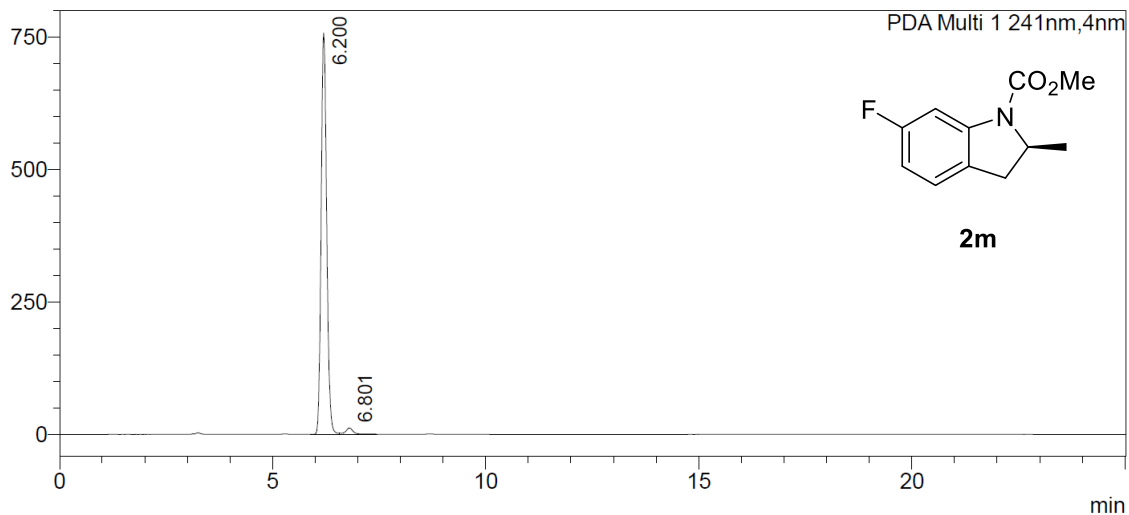

<Peak Table>

PDA Ch1 241nm

| Peak# | Ret. Time | Area    | Height | Area%   |
|-------|-----------|---------|--------|---------|
| 1     | 6.200     | 6856929 | 758418 | 97.945  |
| 2     | 6.801     | 143845  | 11676  | 2.055   |
| Total |           | 7000775 | 770094 | 100.000 |

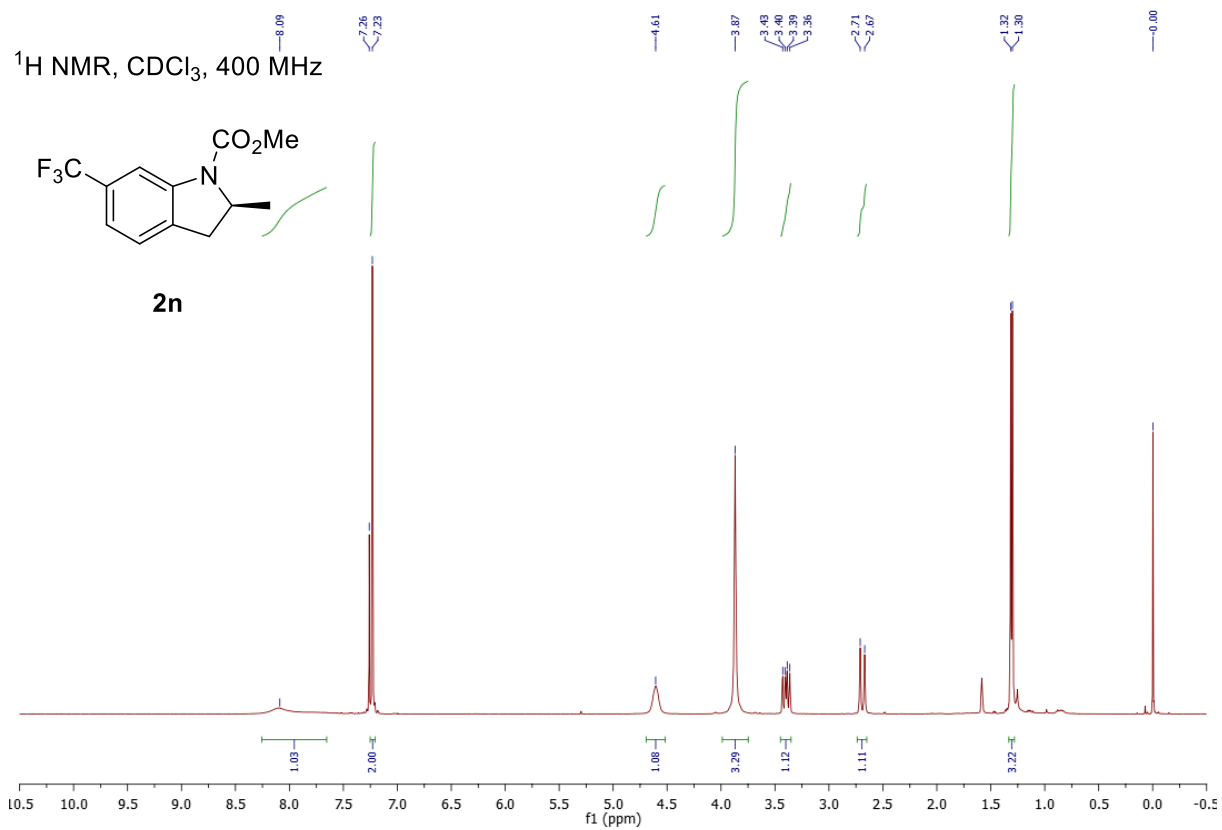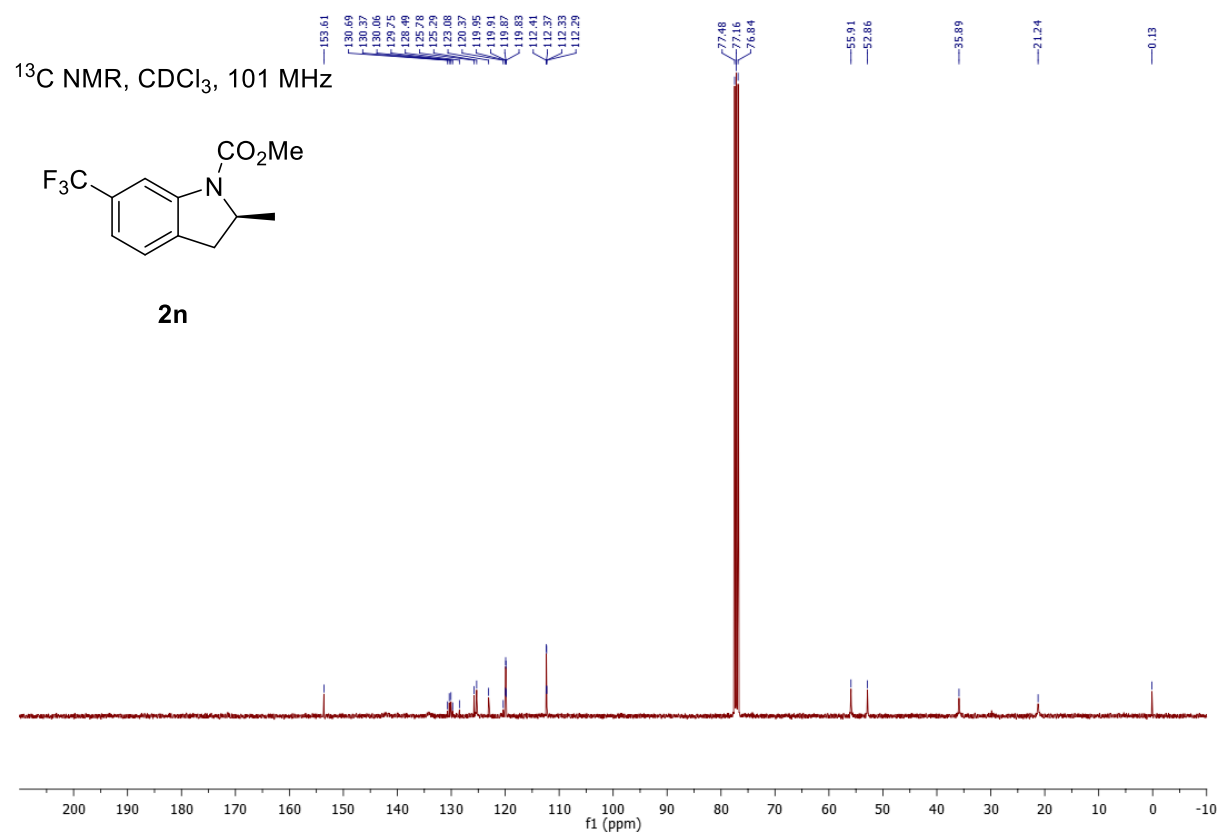

$^{19}\text{F}$  NMR,  $\text{CDCl}_3$ , 376 MHz

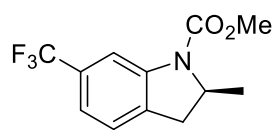

**2n**

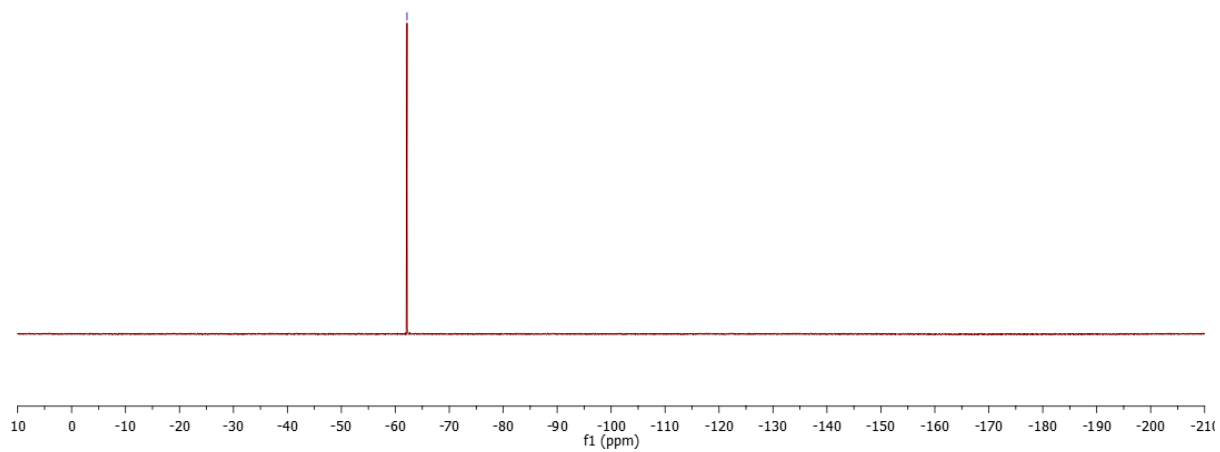

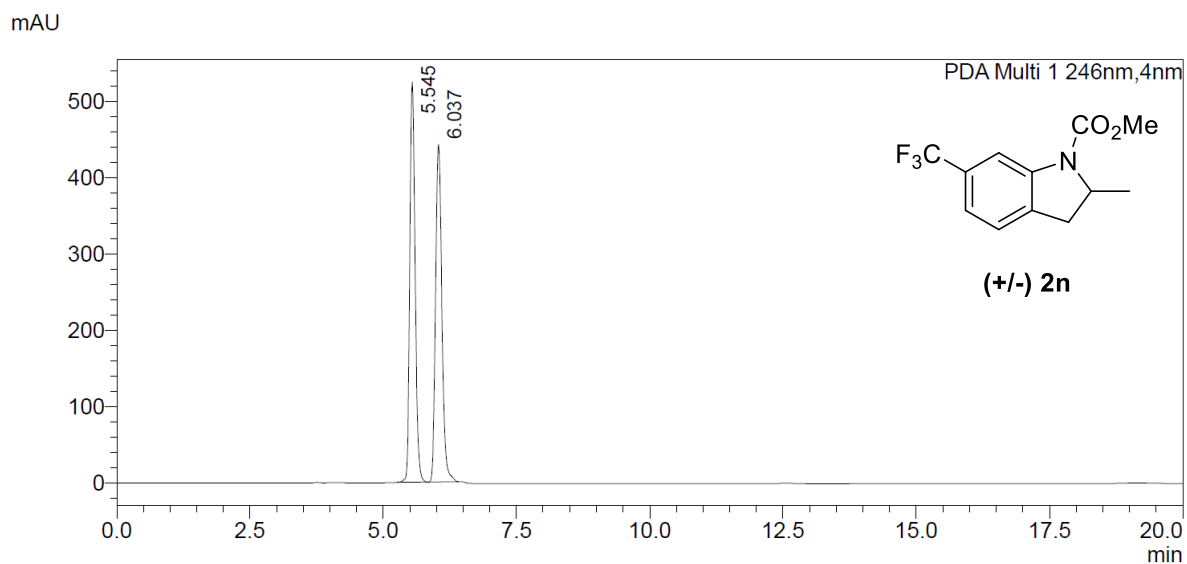

**<Peak Table>**

PDA Ch1 246nm

| Peak# | Ret. Time | Area    | Height | Area%   |
|-------|-----------|---------|--------|---------|
| 1     | 5.545     | 3614807 | 524285 | 49.928  |
| 2     | 6.037     | 3625271 | 442363 | 50.072  |
| Total |           | 7240077 | 966648 | 100.000 |

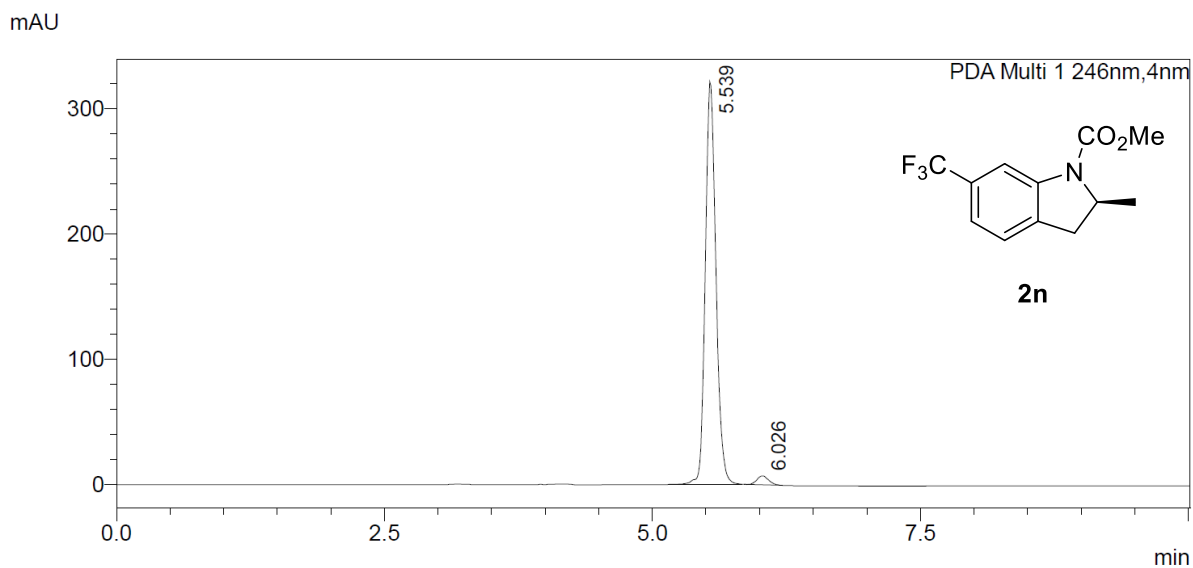

**<Peak Table>**

PDA Ch1 246nm

| Peak# | Ret. Time | Area    | Height | Area%   |
|-------|-----------|---------|--------|---------|
| 1     | 5.539     | 2218612 | 321543 | 97.663  |
| 2     | 6.026     | 53090   | 7055   | 2.337   |
| Total |           | 2271702 | 328597 | 100.000 |

<sup>1</sup>H NMR, CDCl<sub>3</sub>, 400 MHz

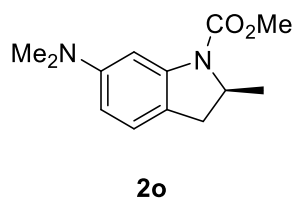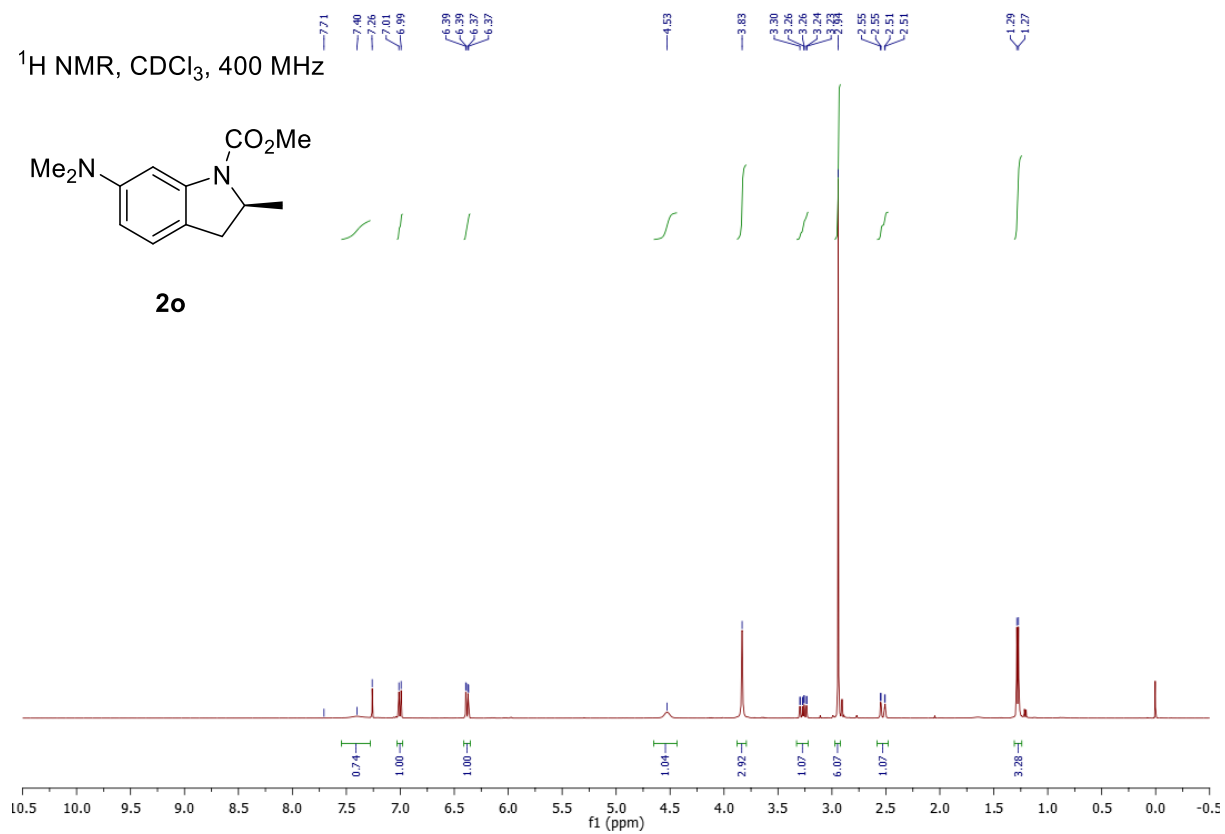

<sup>13</sup>C NMR, CDCl<sub>3</sub>, 101 MHz

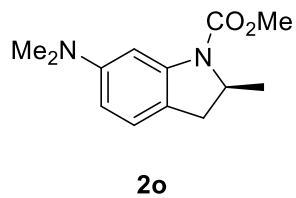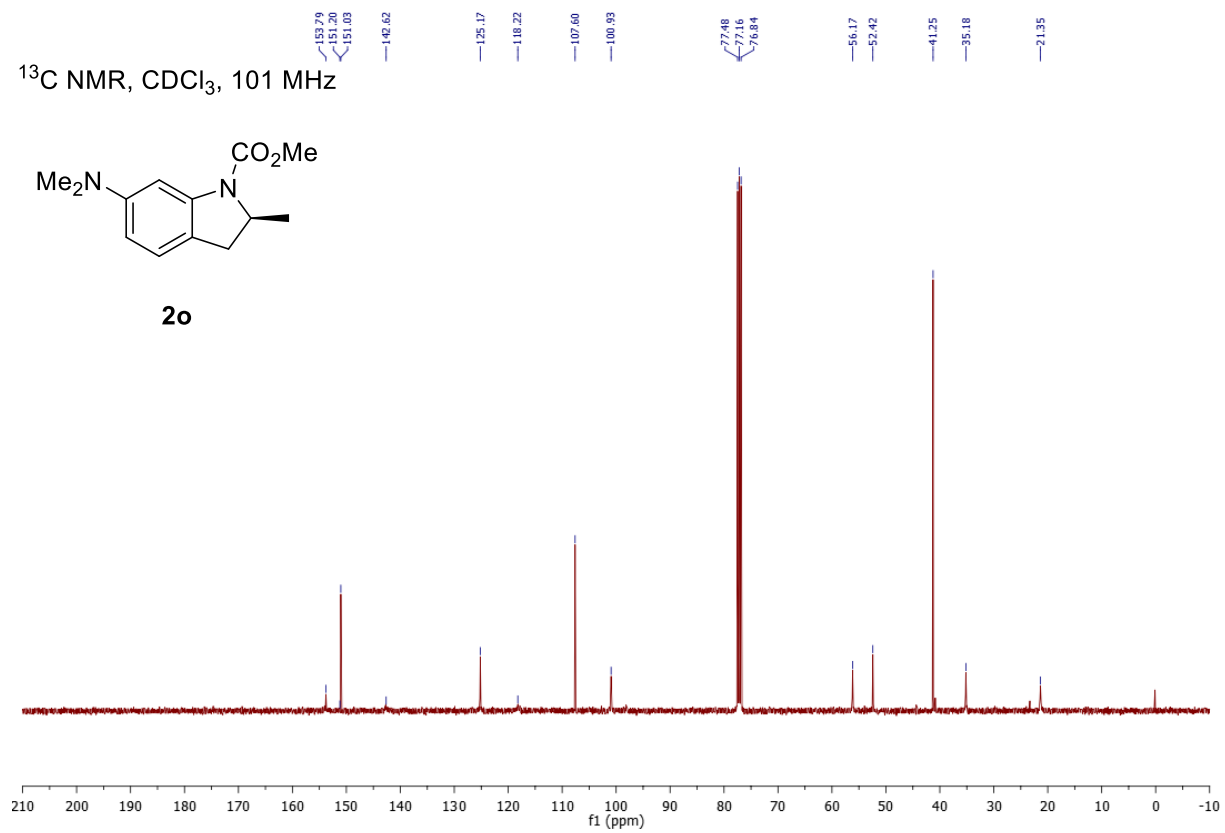



mAU

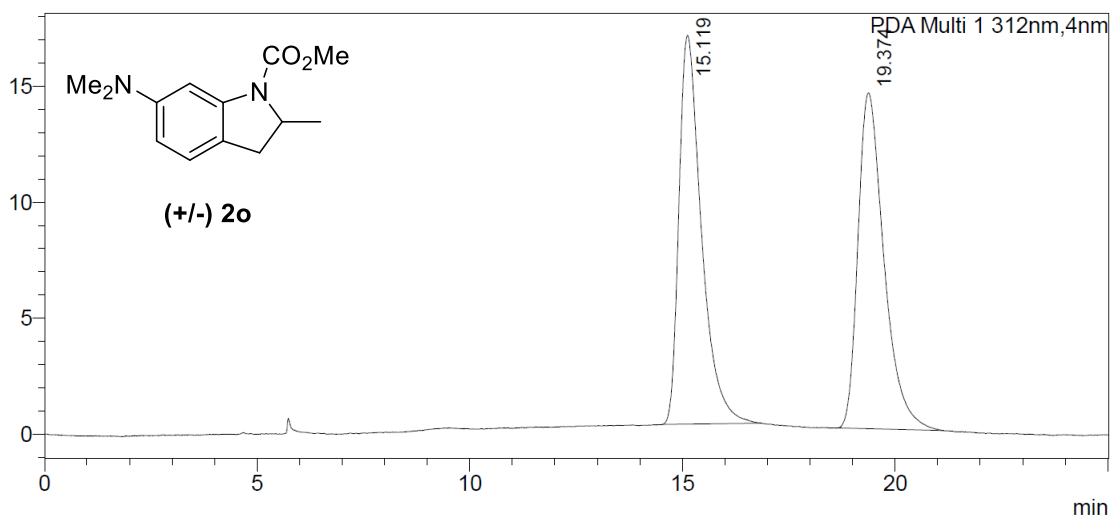

<Peak Table>

PDA Ch1 312nm

| Peak# | Ret. Time | Area    | Height | Area%   |
|-------|-----------|---------|--------|---------|
| 1     | 15.119    | 616790  | 16762  | 50.014  |
| 2     | 19.374    | 616441  | 14482  | 49.986  |
| Total |           | 1233231 | 31244  | 100.000 |

mAU

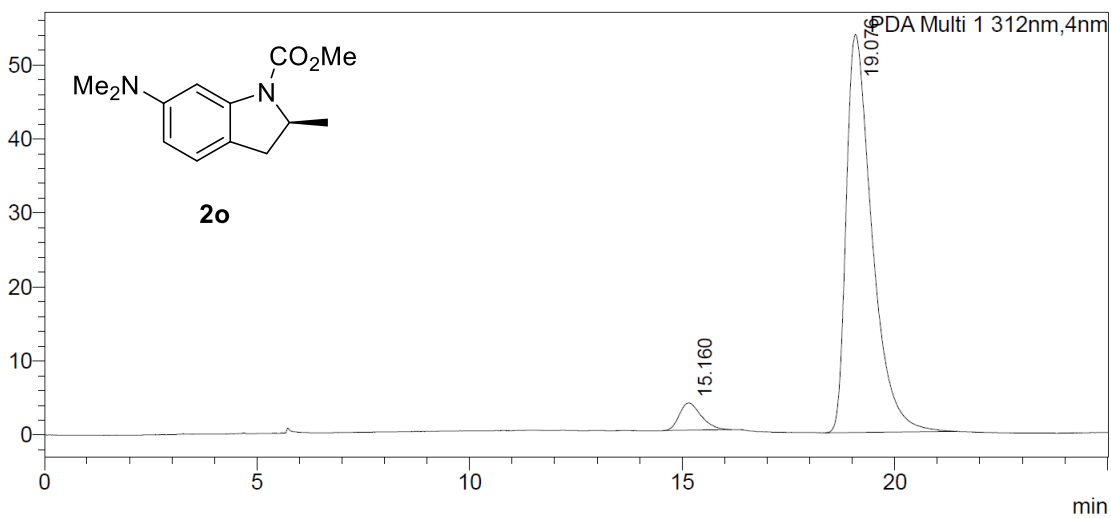

<Peak Table>

PDA Ch1 312nm

| Peak# | Ret. Time | Area    | Height | Area%   |
|-------|-----------|---------|--------|---------|
| 1     | 15.160    | 131325  | 3690   | 5.467   |
| 2     | 19.076    | 2270769 | 53789  | 94.533  |
| Total |           | 2402095 | 57480  | 100.000 |

<sup>1</sup>H NMR, CDCl<sub>3</sub>, 400 MHz

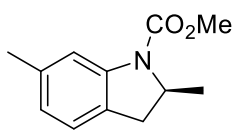

2p

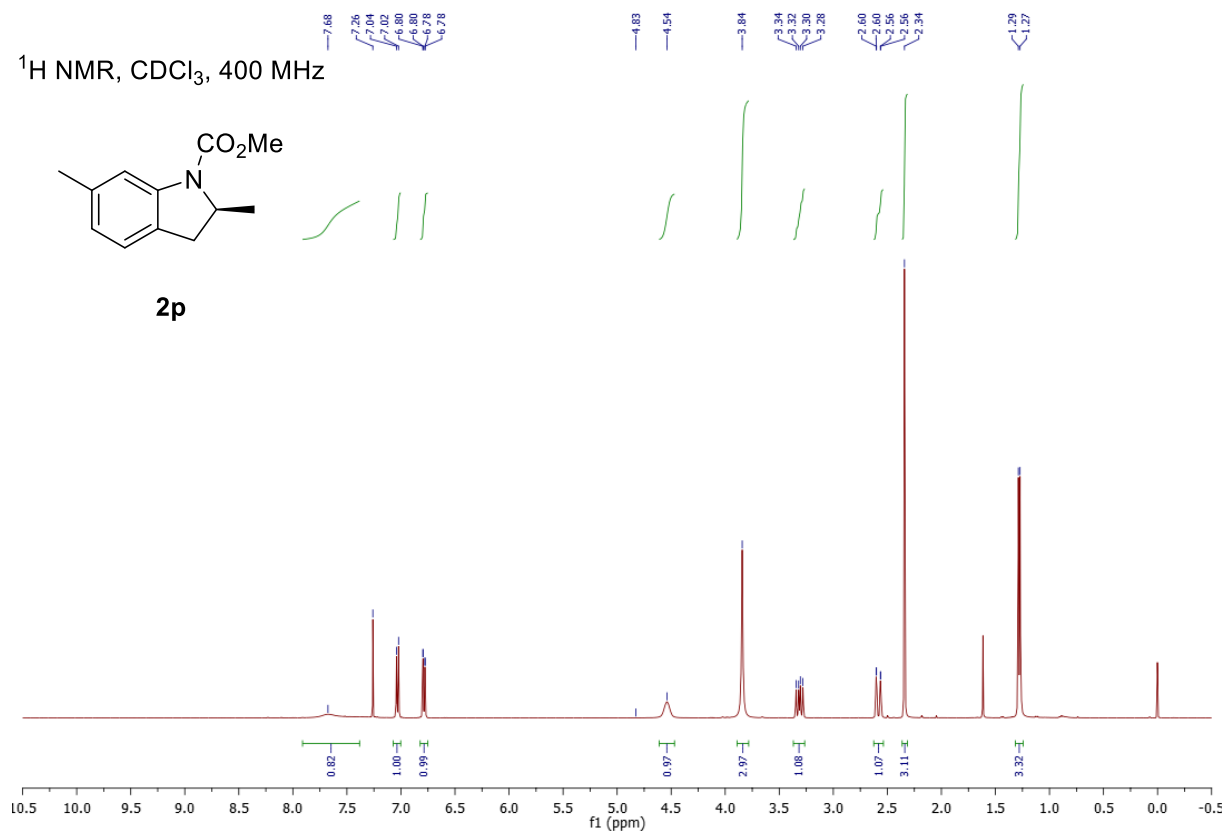

<sup>13</sup>C NMR, CDCl<sub>3</sub>, 101 MHz

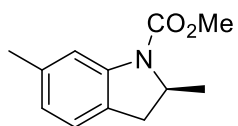

2p

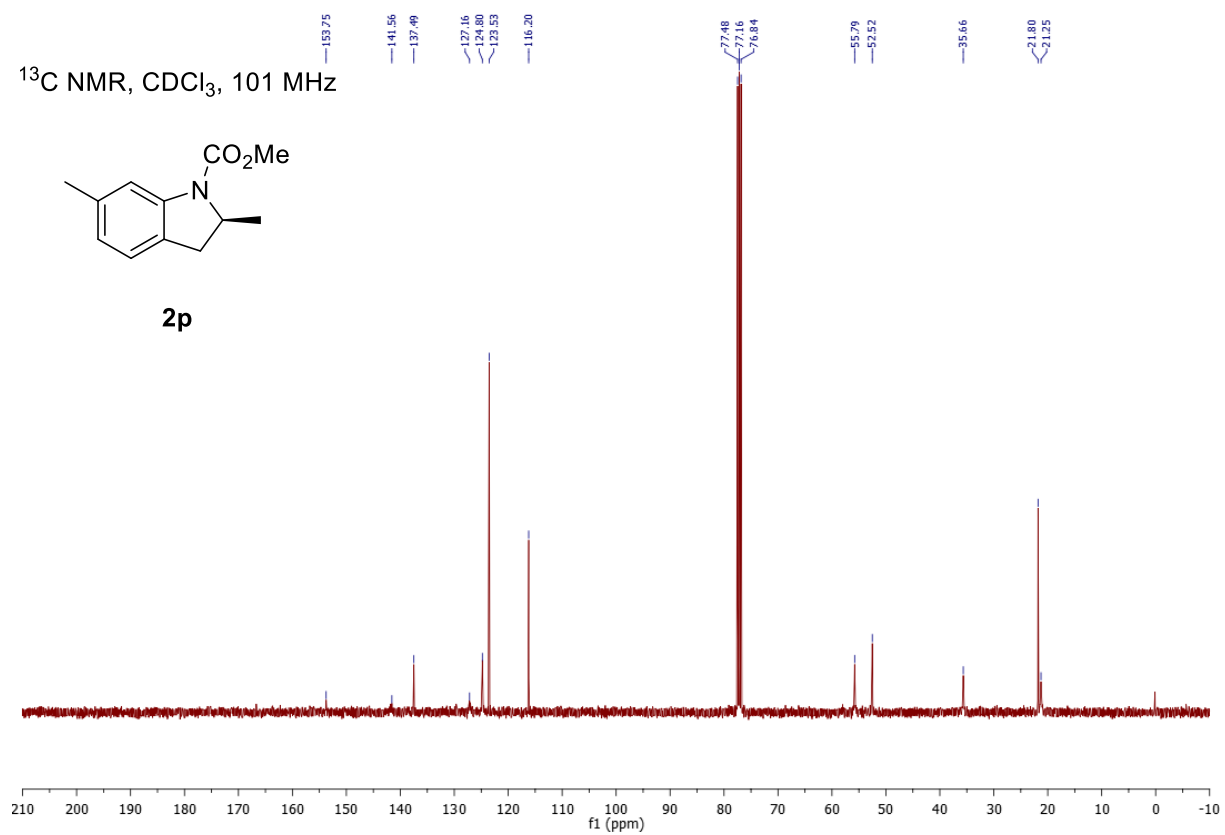

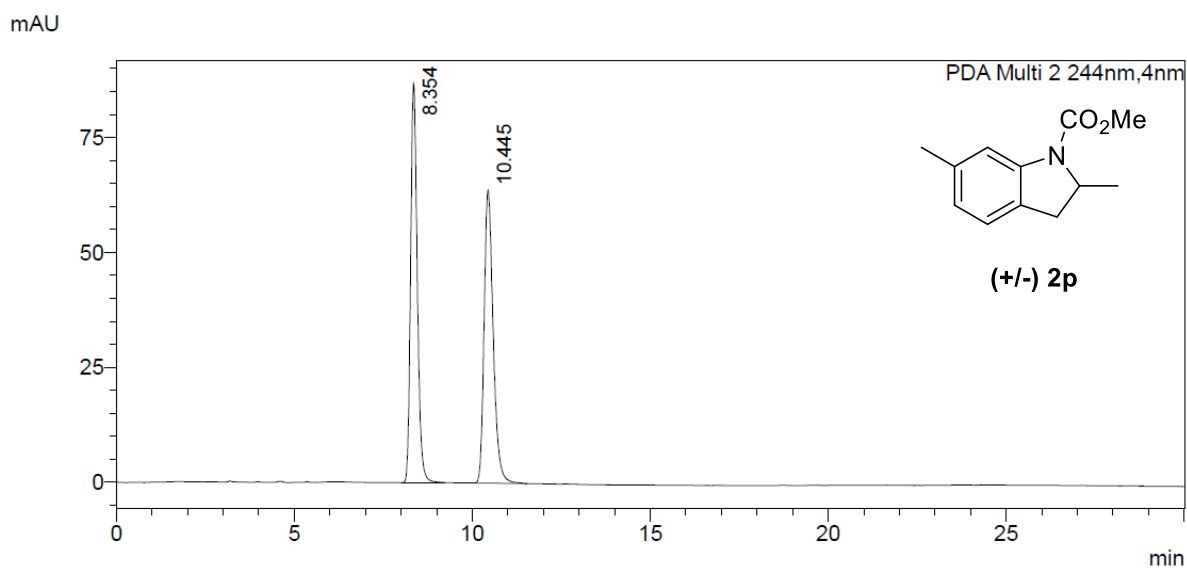

**<Peak Table>**

PDA Ch2 244nm

| Peak# | Ret. Time | Area    | Height | Area%   |
|-------|-----------|---------|--------|---------|
| 1     | 8.354     | 1133948 | 86846  | 50.063  |
| 2     | 10.445    | 1131106 | 63778  | 49.937  |
| Total |           | 2265054 | 150624 | 100.000 |

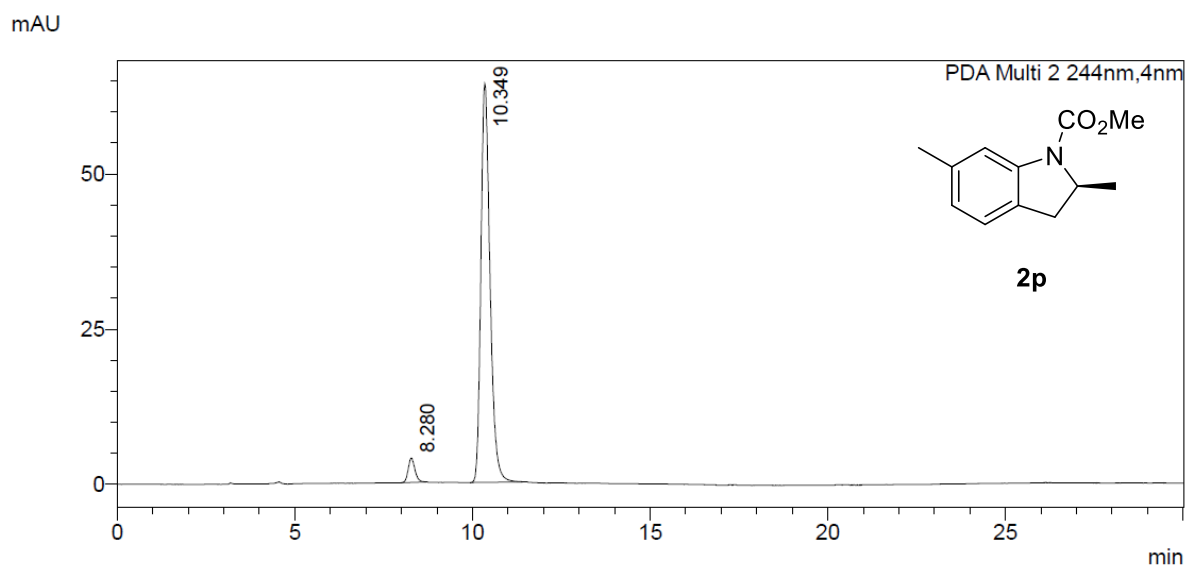

**<Peak Table>**

PDA Ch2 244nm

| Peak# | Ret. Time | Area    | Height | Area%   |
|-------|-----------|---------|--------|---------|
| 1     | 8.280     | 51873   | 3920   | 4.331   |
| 2     | 10.349    | 1145831 | 64250  | 95.669  |
| Total |           | 1197703 | 68170  | 100.000 |

<sup>1</sup>H NMR, CDCl<sub>3</sub>, 400 MHz

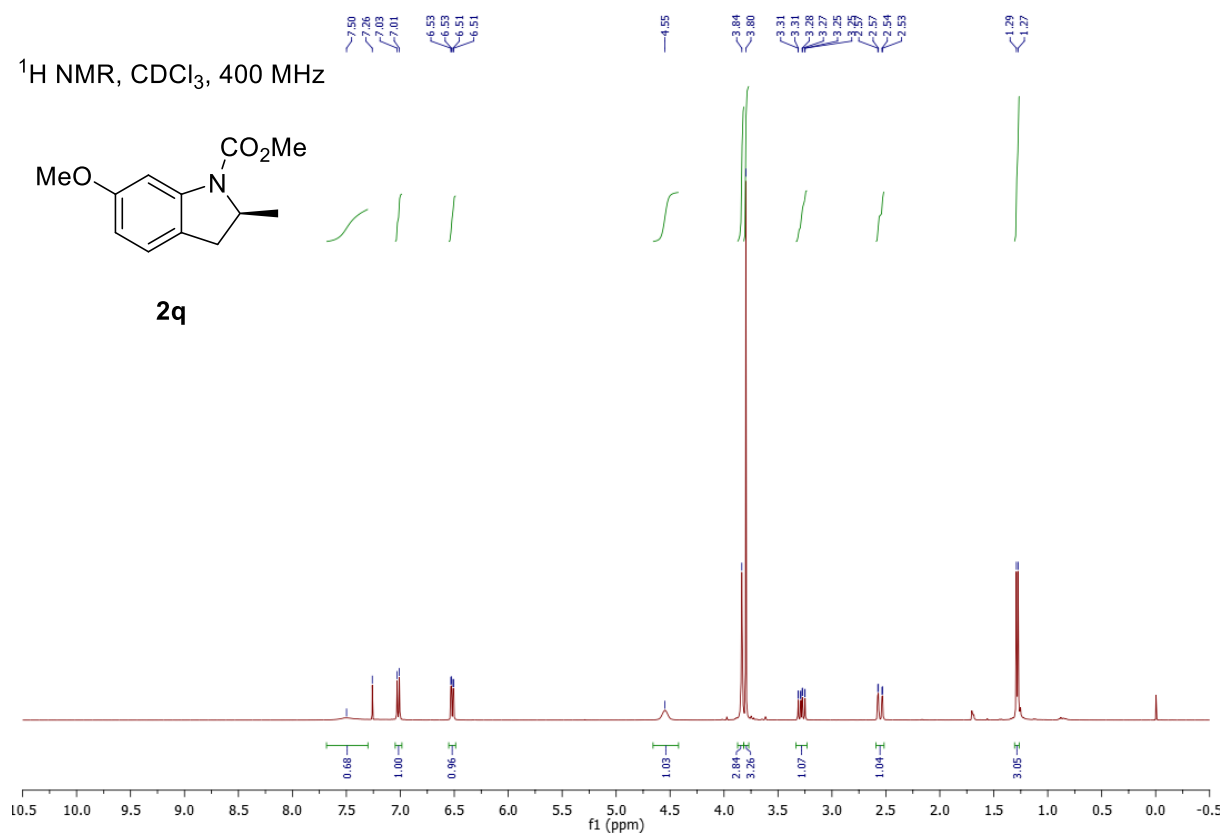

<sup>13</sup>C NMR, CDCl<sub>3</sub>, 101 MHz

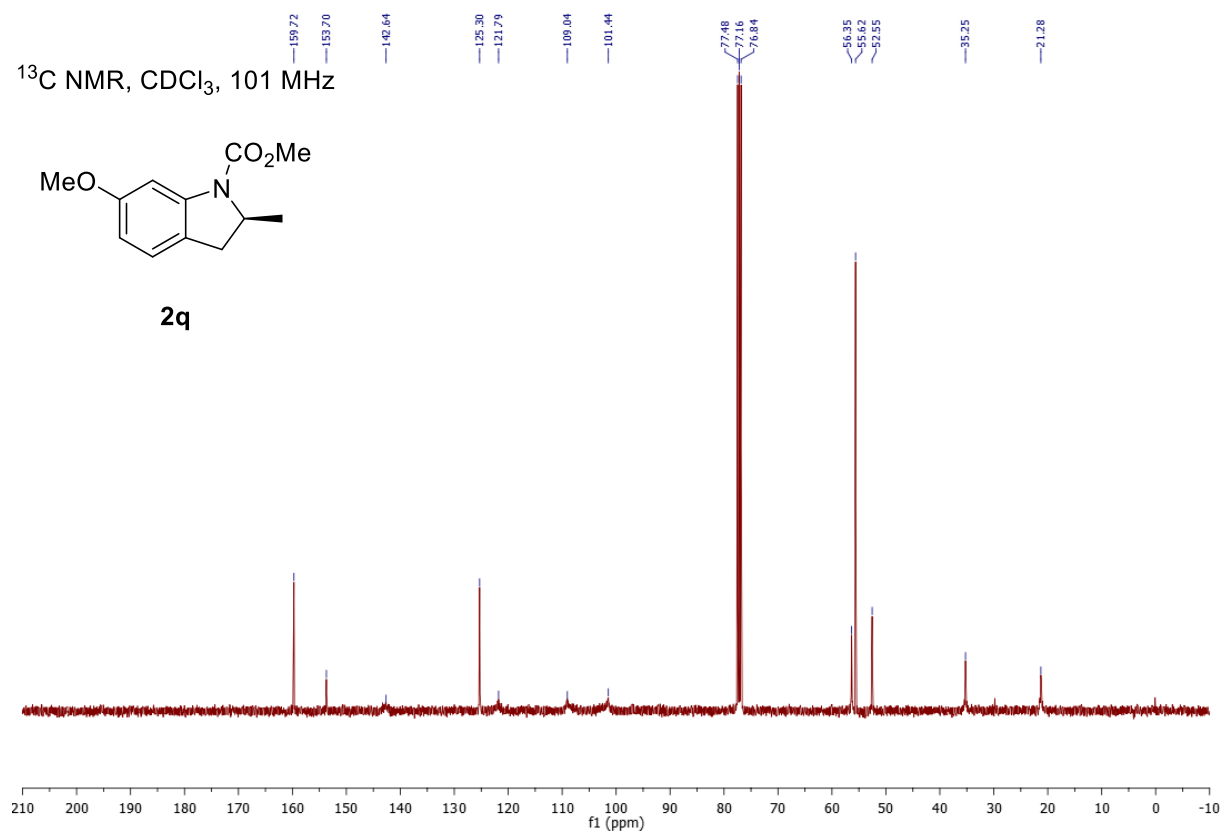

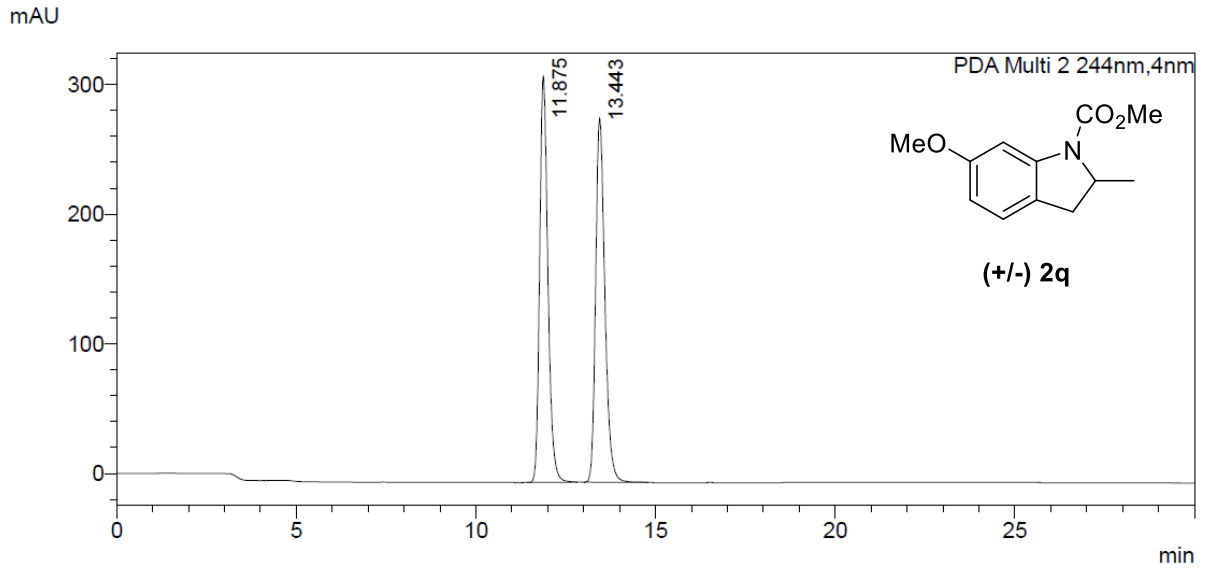

**<Peak Table>**

PDA Ch2 244nm

| Peak# | Ret. Time | Area     | Height | Area%   |
|-------|-----------|----------|--------|---------|
| 1     | 11.875    | 5010149  | 313411 | 49.973  |
| 2     | 13.443    | 5015631  | 280866 | 50.027  |
| Total |           | 10025781 | 594277 | 100.000 |

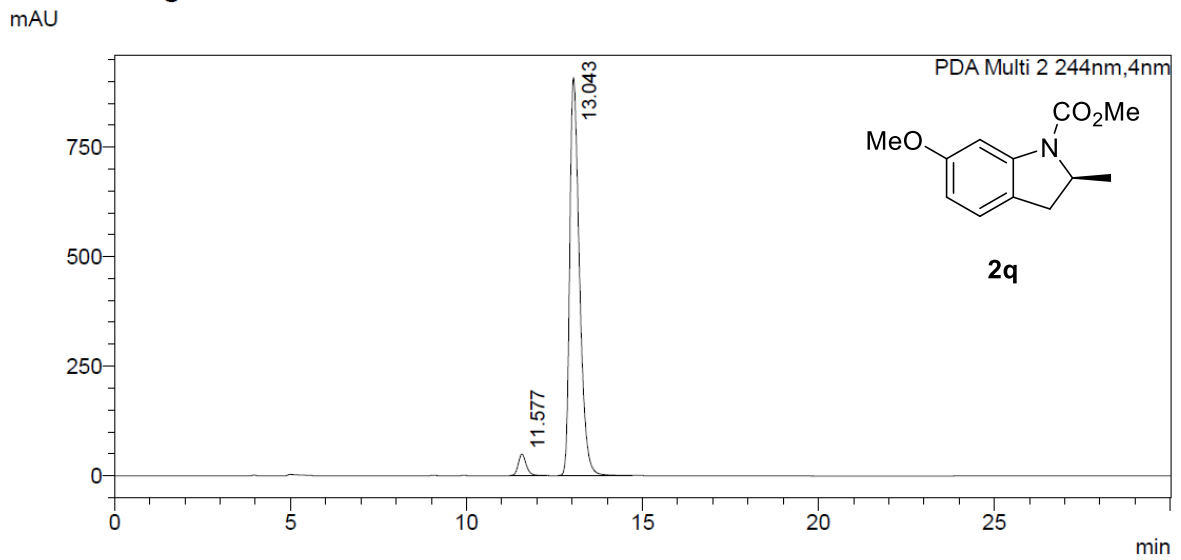

**<Peak Table>**

PDA Ch2 244nm

| Peak# | Ret. Time | Area     | Height | Conc.  | Area%   |
|-------|-----------|----------|--------|--------|---------|
| 1     | 11.577    | 771295   | 49148  | 4.210  | 4.210   |
| 2     | 13.043    | 17547455 | 907407 | 95.790 | 95.790  |
| Total |           | 18318750 | 956555 |        | 100.000 |

<sup>1</sup>H NMR, CDCl<sub>3</sub>, 400 MHz

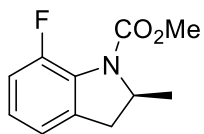

**2r**

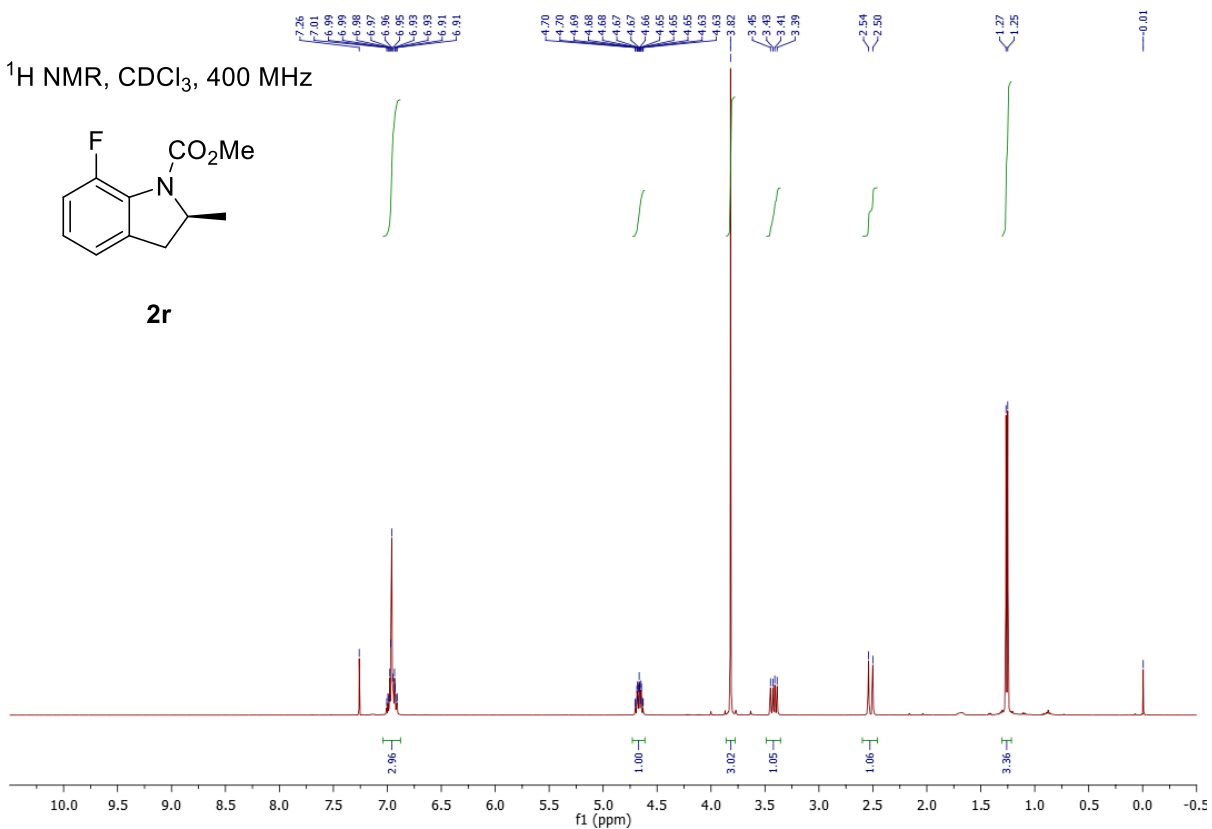

<sup>13</sup>C NMR, CDCl<sub>3</sub>, 101 MHz

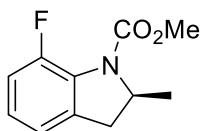

**2r**

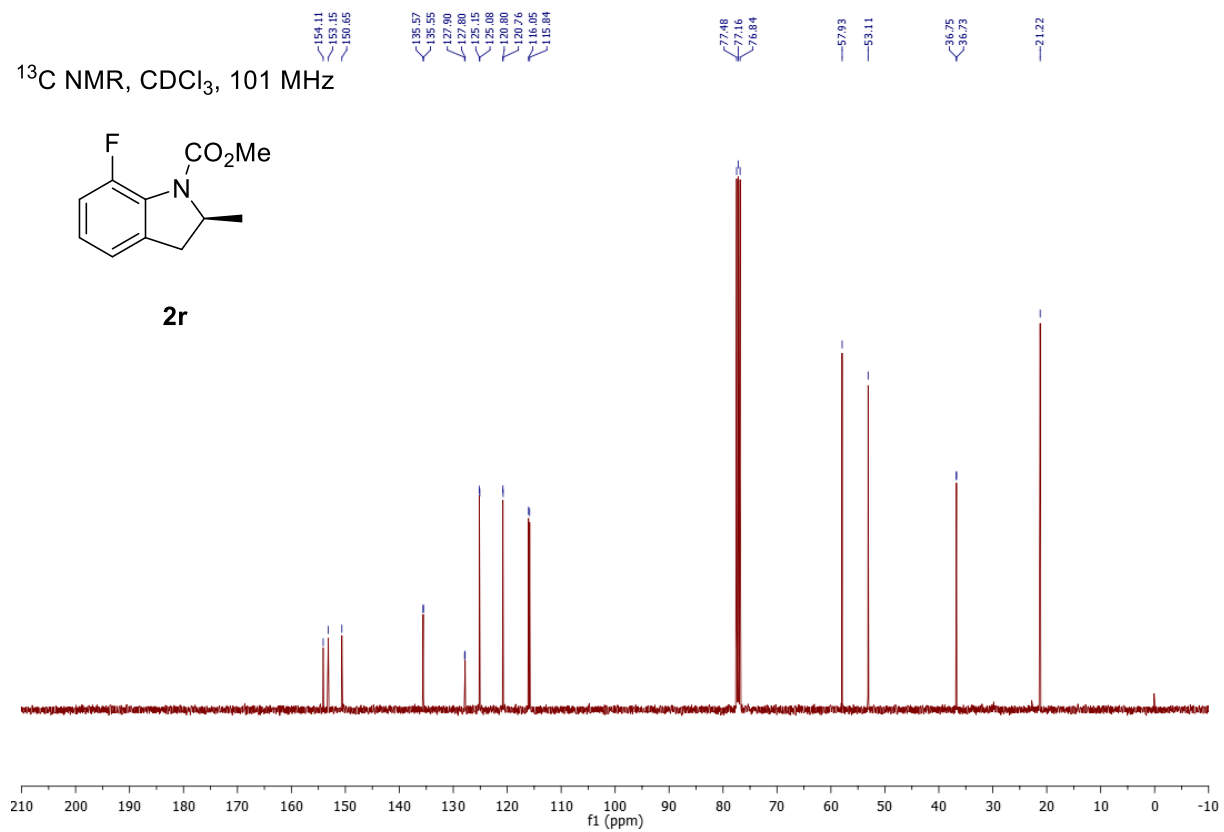

$^{19}\text{F}$  NMR,  $\text{CDCl}_3$ , 376 MHz

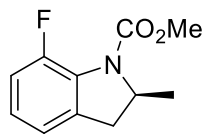

**2r**

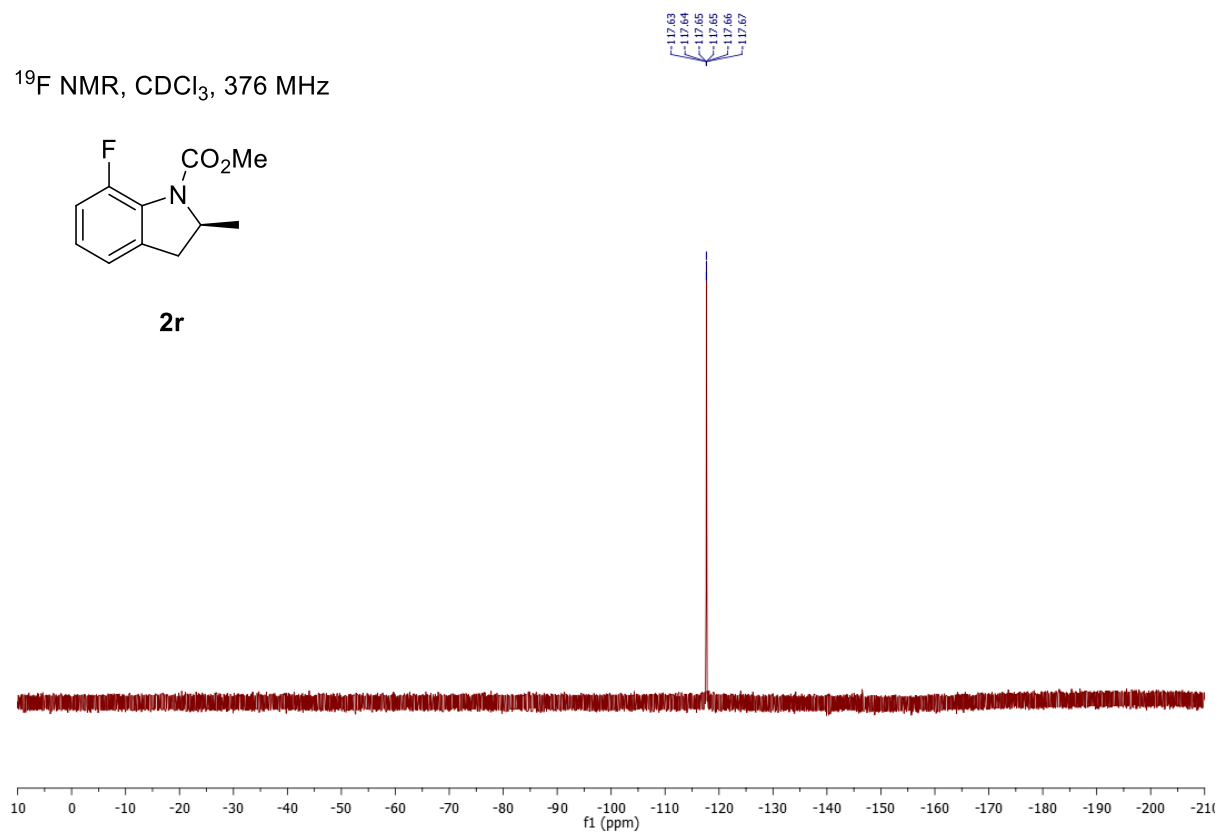

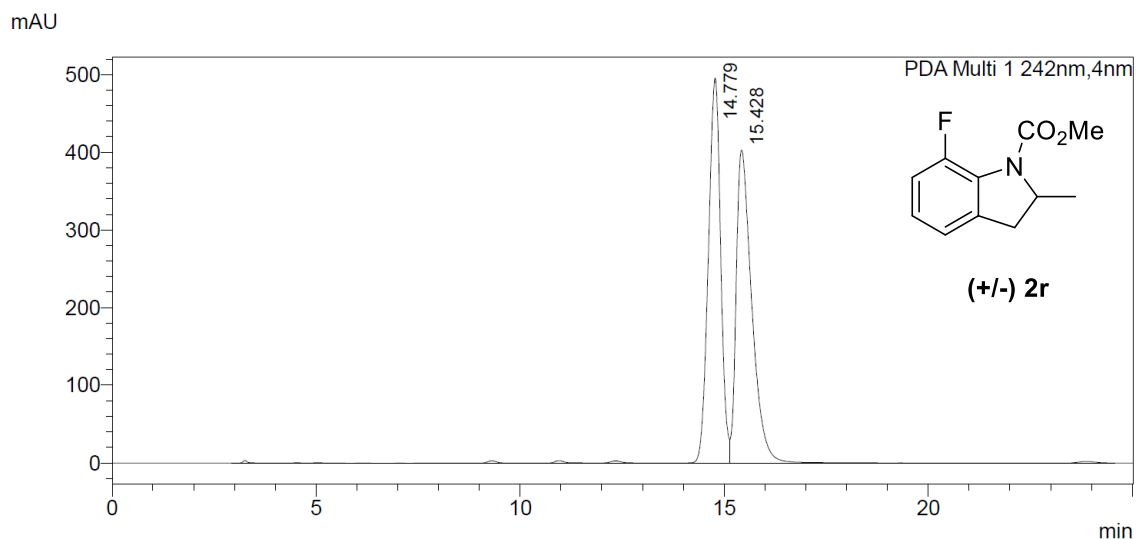

**<Peak Table>**

PDA Ch1 242nm

| Peak# | Ret. Time | Area     | Height | Area%   |
|-------|-----------|----------|--------|---------|
| 1     | 14.779    | 10551527 | 495275 | 49.491  |
| 2     | 15.428    | 10768496 | 402795 | 50.509  |
| Total |           | 21320023 | 898070 | 100.000 |

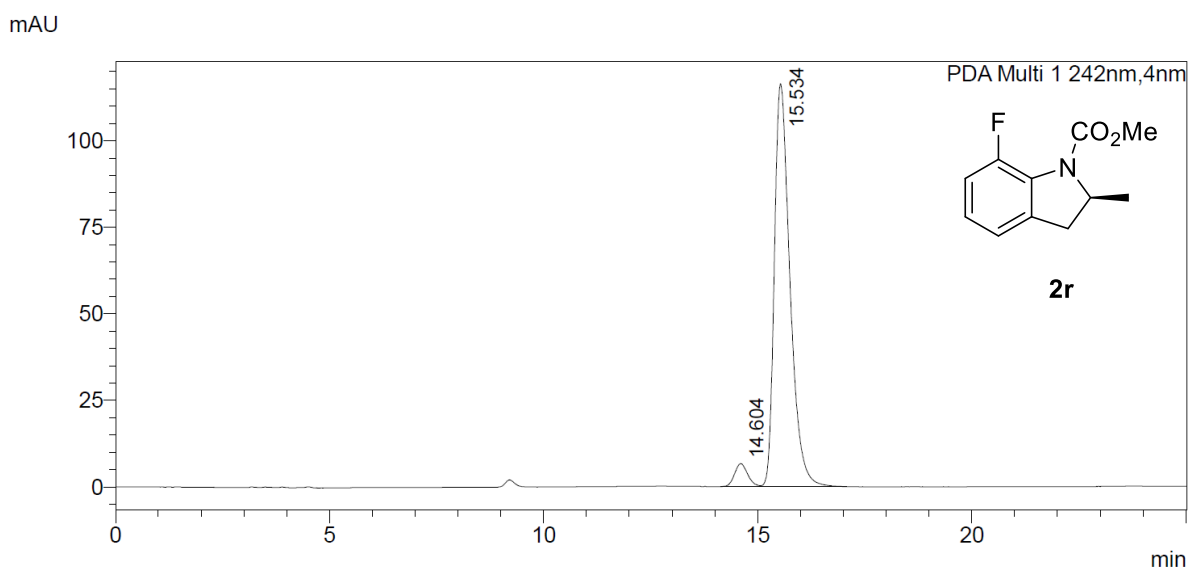

**<Peak Table>**

PDA Ch1 242nm

| Peak# | Ret. Time | Area    | Height | Area%   |
|-------|-----------|---------|--------|---------|
| 1     | 14.604    | 140604  | 6620   | 4.549   |
| 2     | 15.534    | 2950336 | 116399 | 95.451  |
| Total |           | 3090940 | 123020 | 100.000 |



<sup>1</sup>H NMR, CDCl<sub>3</sub>, 400 MHz

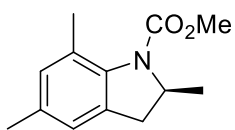

**2s**

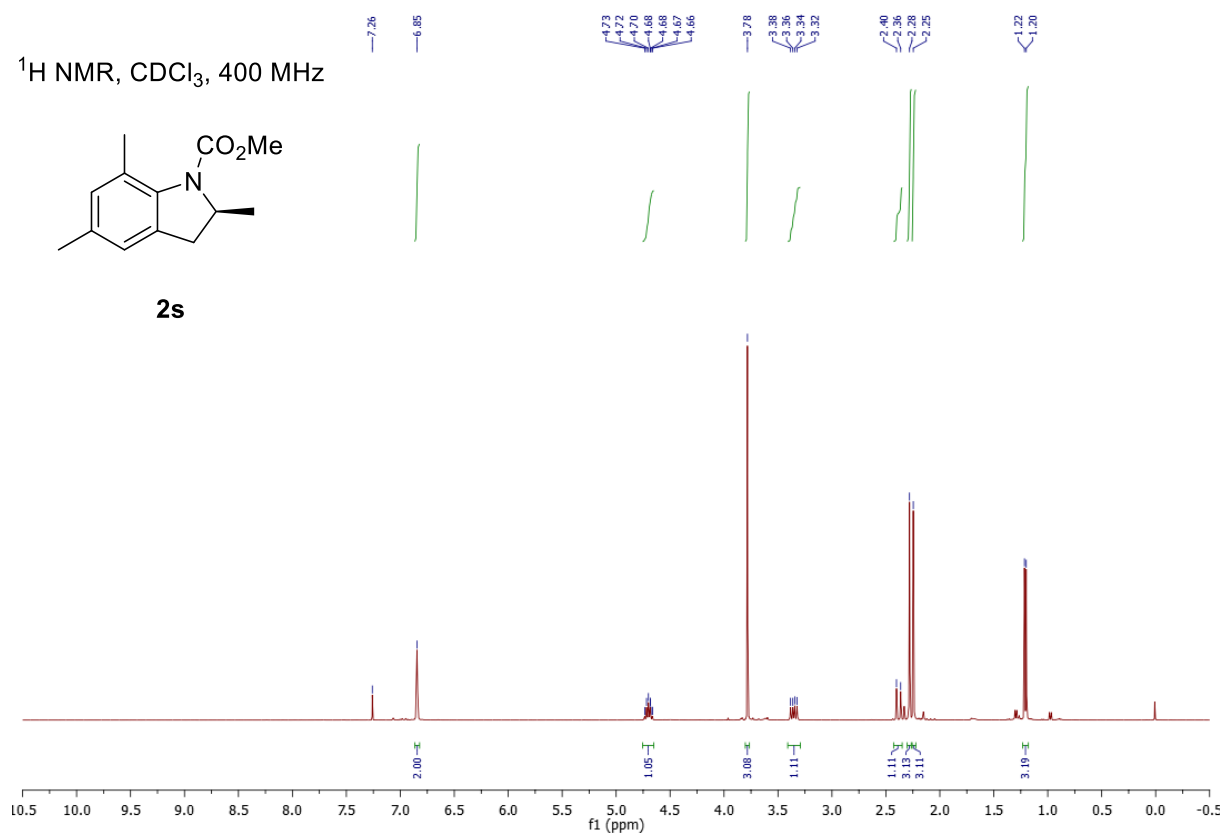

<sup>13</sup>C NMR, CDCl<sub>3</sub>, 101 MHz

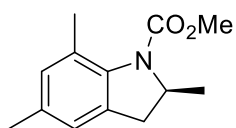

**2s**

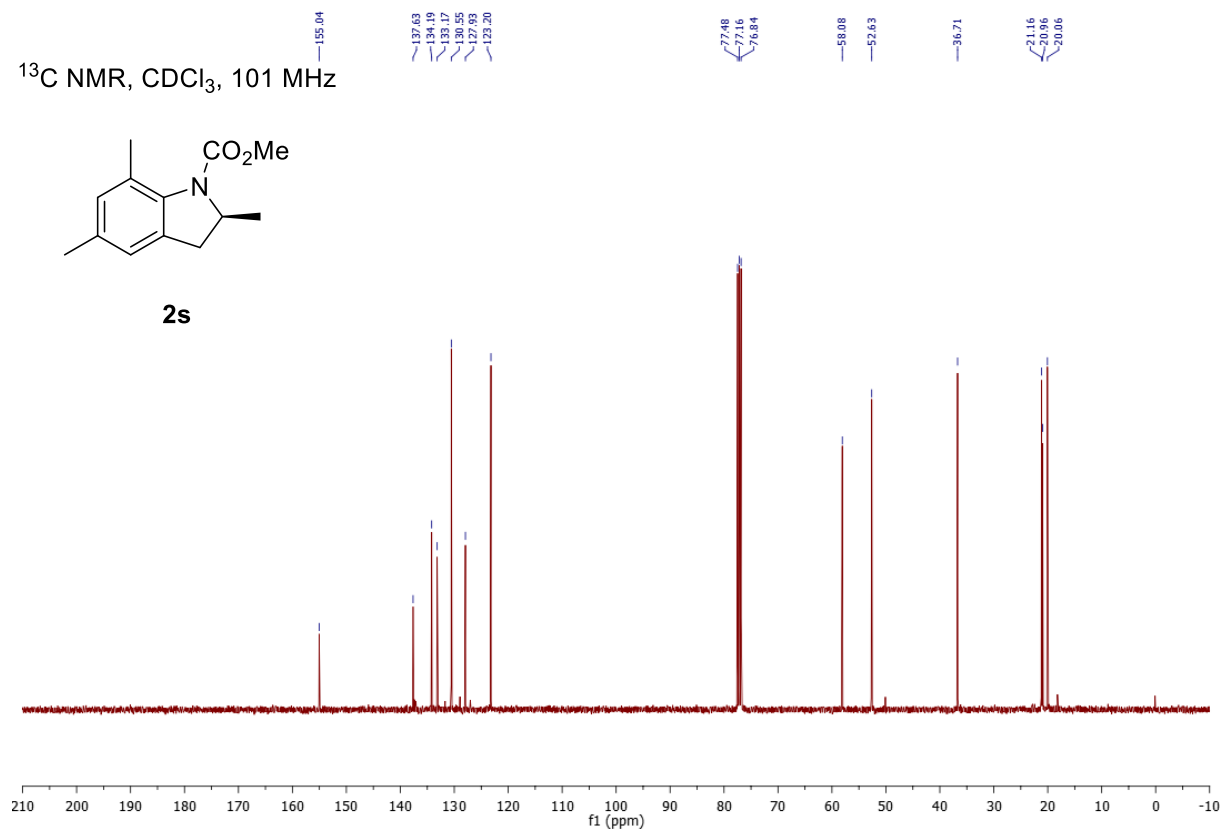

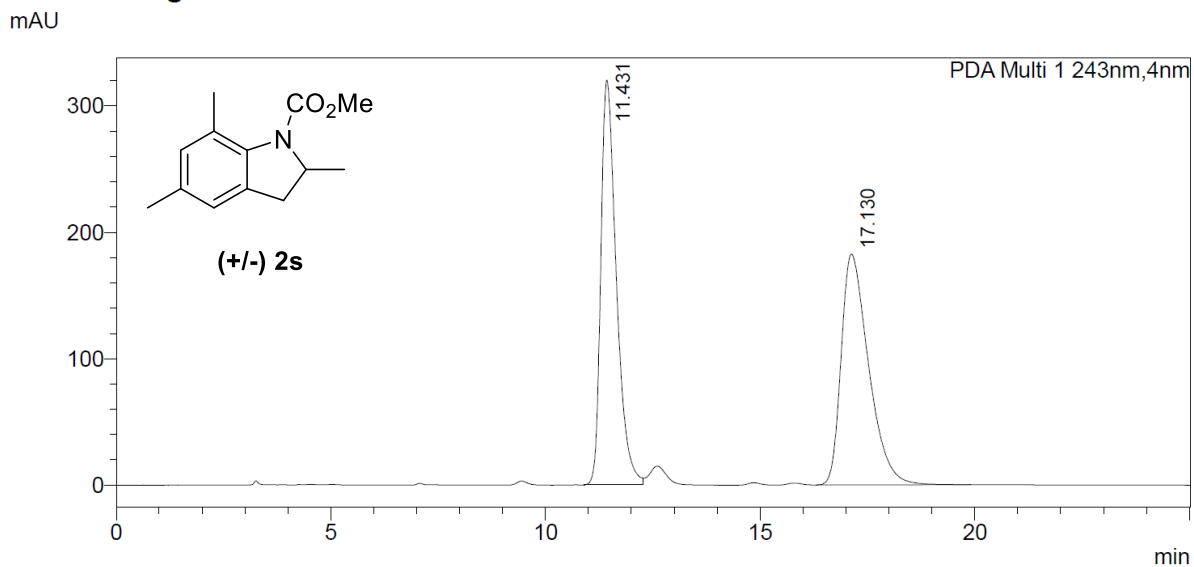

**<Peak Table>**

PDA Ch1 243nm

| Peak# | Ret. Time | Area     | Height | Area%   |
|-------|-----------|----------|--------|---------|
| 1     | 11.431    | 8043518  | 320070 | 49.788  |
| 2     | 17.130    | 8112132  | 182525 | 50.212  |
| Total |           | 16155651 | 502596 | 100.000 |

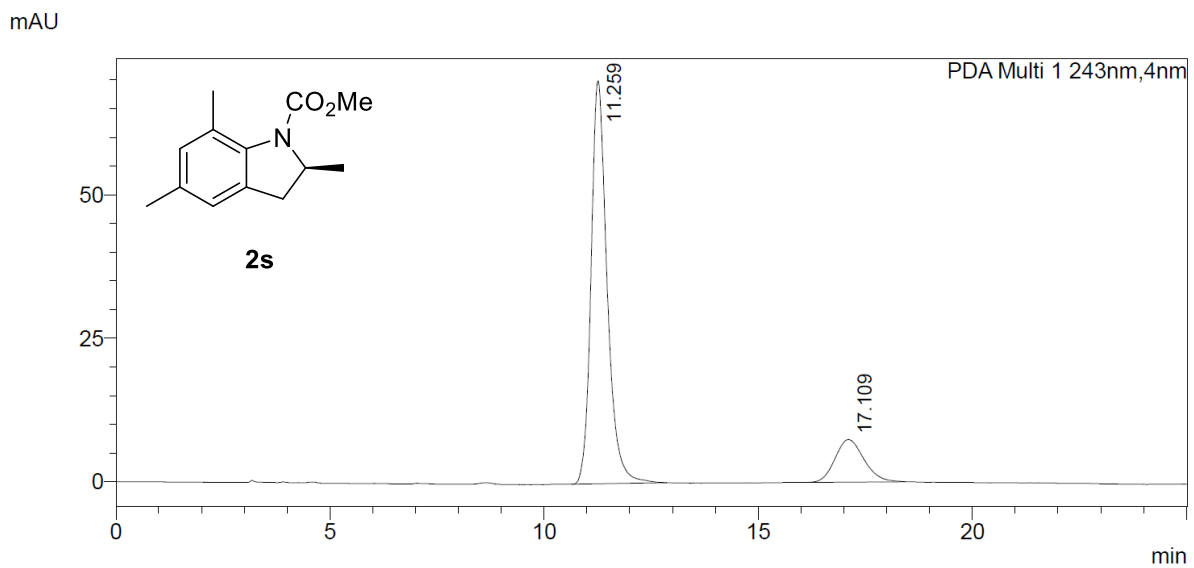

**<Peak Table>**

PDA Ch1 243nm

| Peak# | Ret. Time | Area    | Height | Area%   |
|-------|-----------|---------|--------|---------|
| 1     | 11.259    | 1829198 | 70201  | 84.073  |
| 2     | 17.109    | 346518  | 7402   | 15.927  |
| Total |           | 2175716 | 77602  | 100.000 |

<sup>1</sup>H NMR, CDCl<sub>3</sub>, 400 MHz

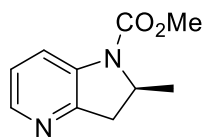

**2t**

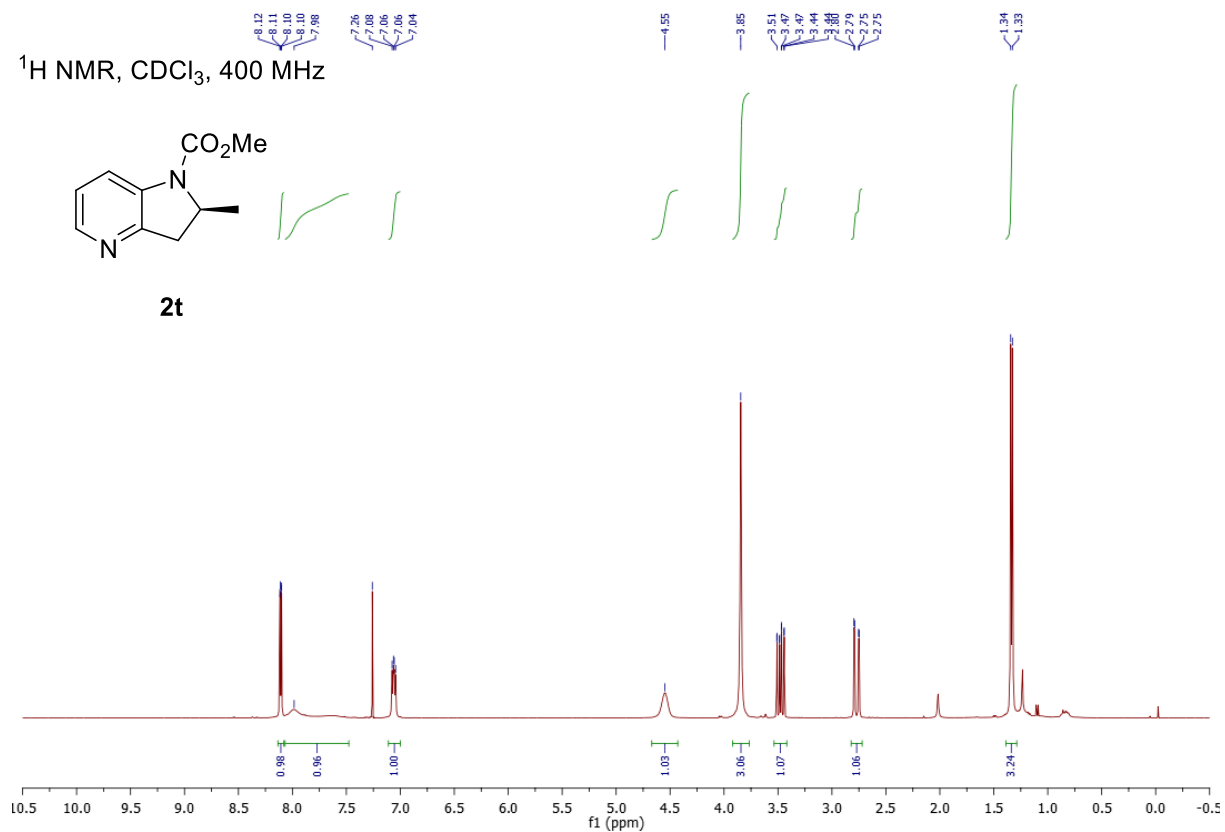

<sup>13</sup>C NMR, CDCl<sub>3</sub>, 101 MHz

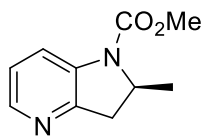

**2t**

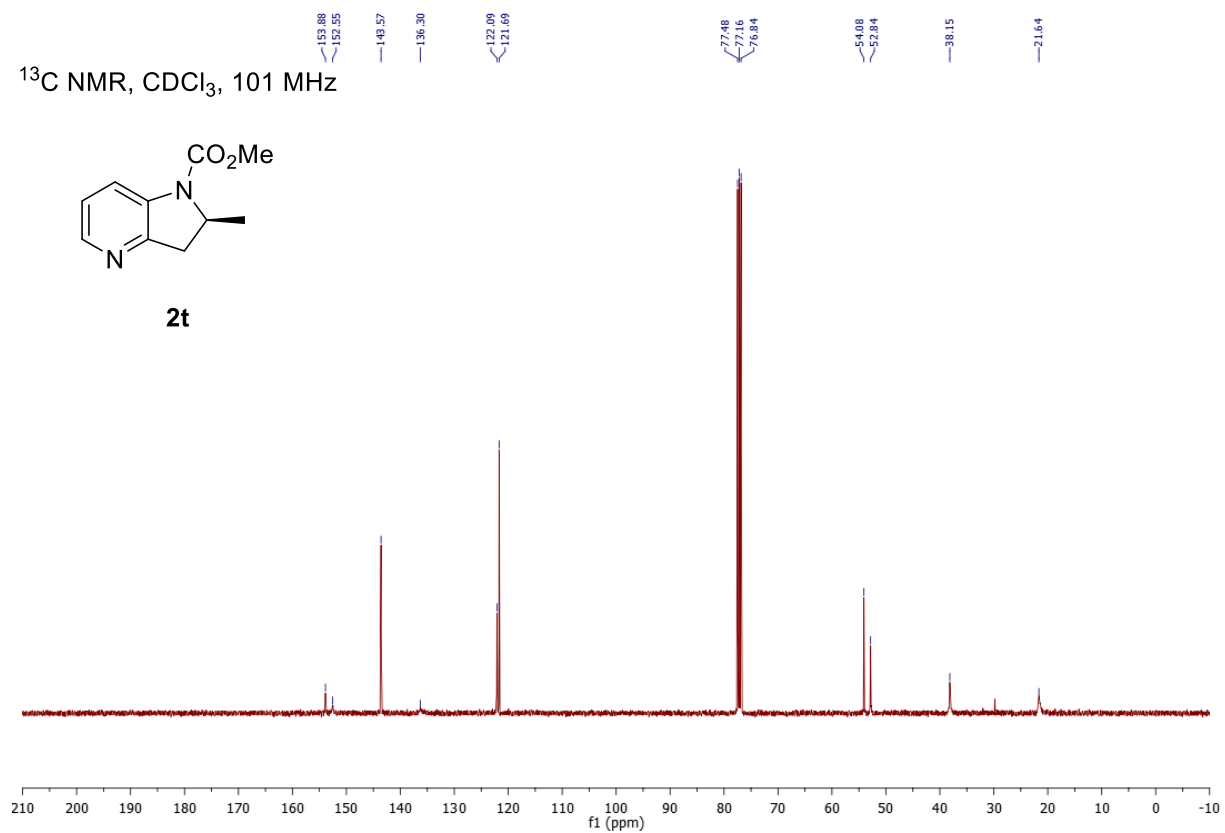

mAU

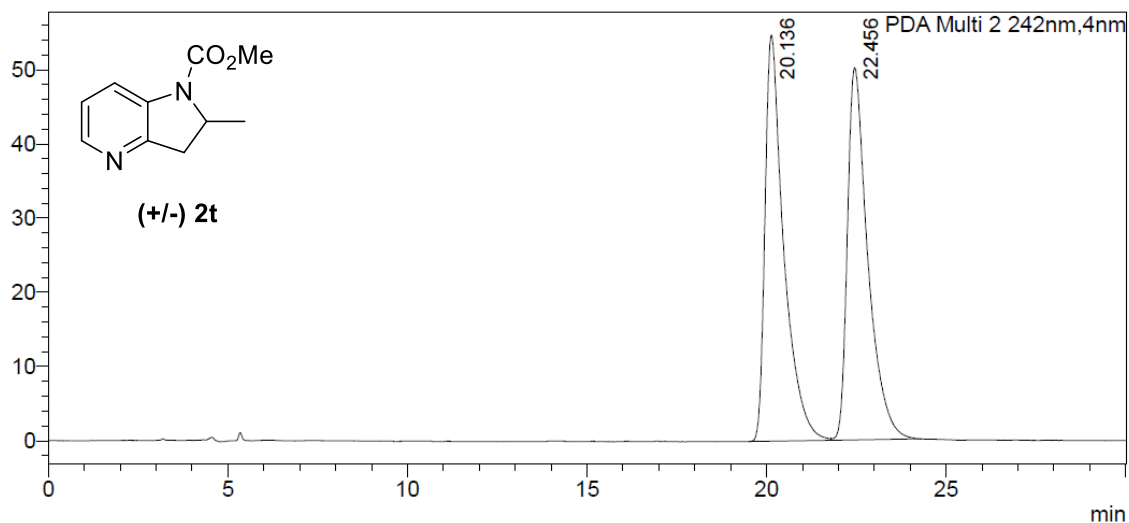

<Peak Table>

PDA Ch2 242nm

| Peak# | Ret. Time | Area    | Height | Area%   |
|-------|-----------|---------|--------|---------|
| 1     | 20.136    | 1989381 | 54691  | 50.087  |
| 2     | 22.456    | 1982484 | 50165  | 49.913  |
| Total |           | 3971865 | 104856 | 100.000 |

mAU

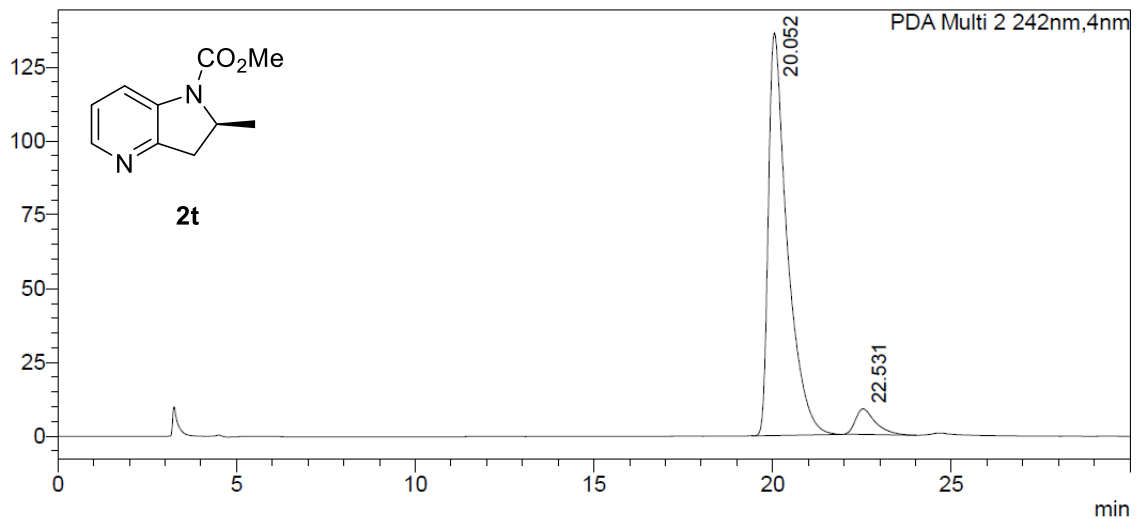

<Peak Table>

PDA Ch2 242nm

| Peak# | Ret. Time | Area    | Height | Area%   |
|-------|-----------|---------|--------|---------|
| 1     | 20.052    | 5008295 | 136294 | 93.767  |
| 2     | 22.531    | 332899  | 8621   | 6.233   |
| Total |           | 5341194 | 144915 | 100.000 |

<sup>1</sup>H NMR, CDCl<sub>3</sub>, 400 MHz

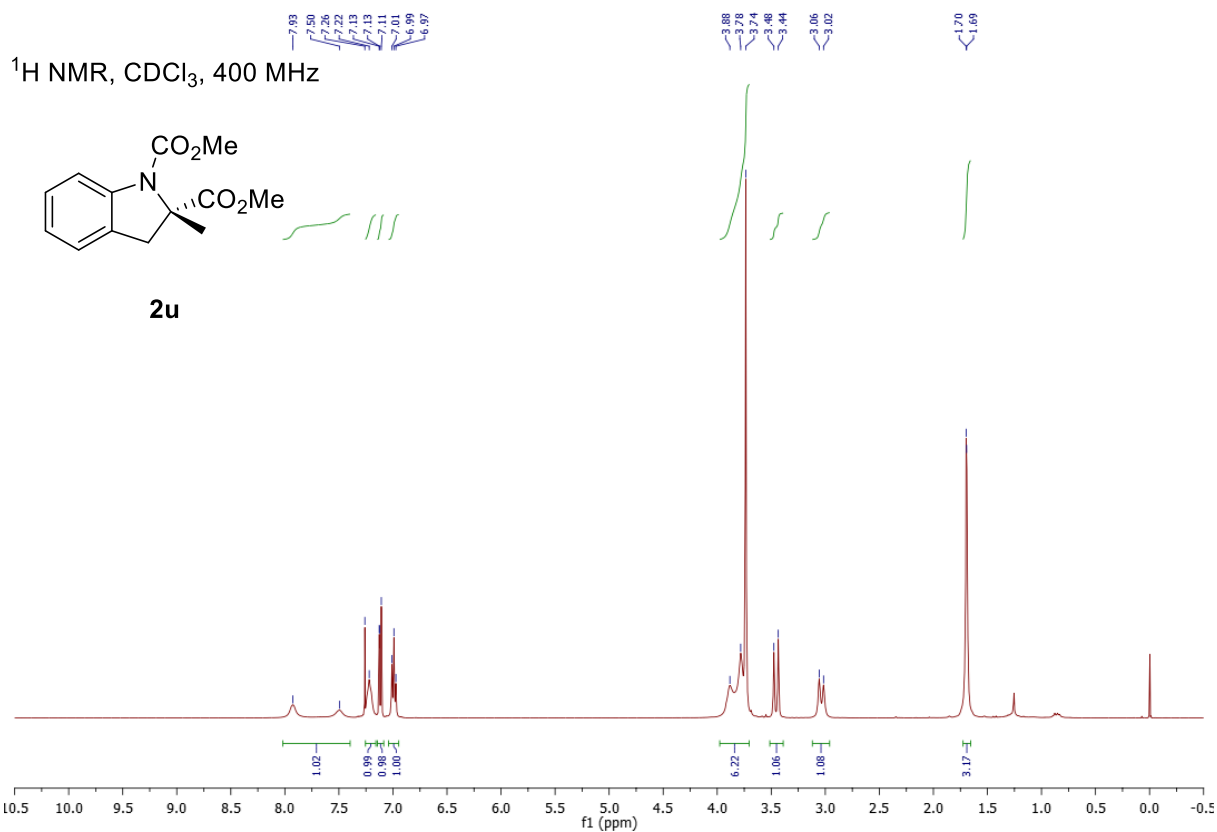

<sup>13</sup>C NMR, CDCl<sub>3</sub>, 101 MHz

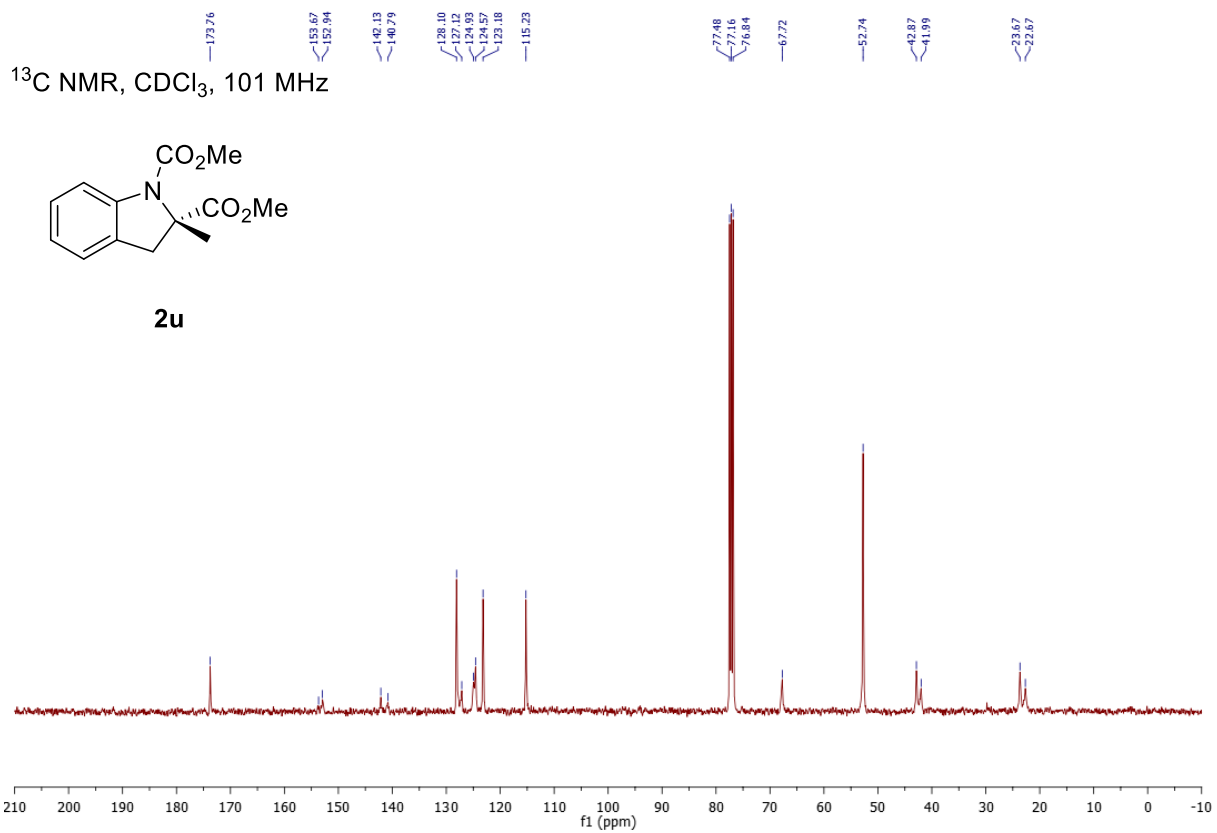

mAU

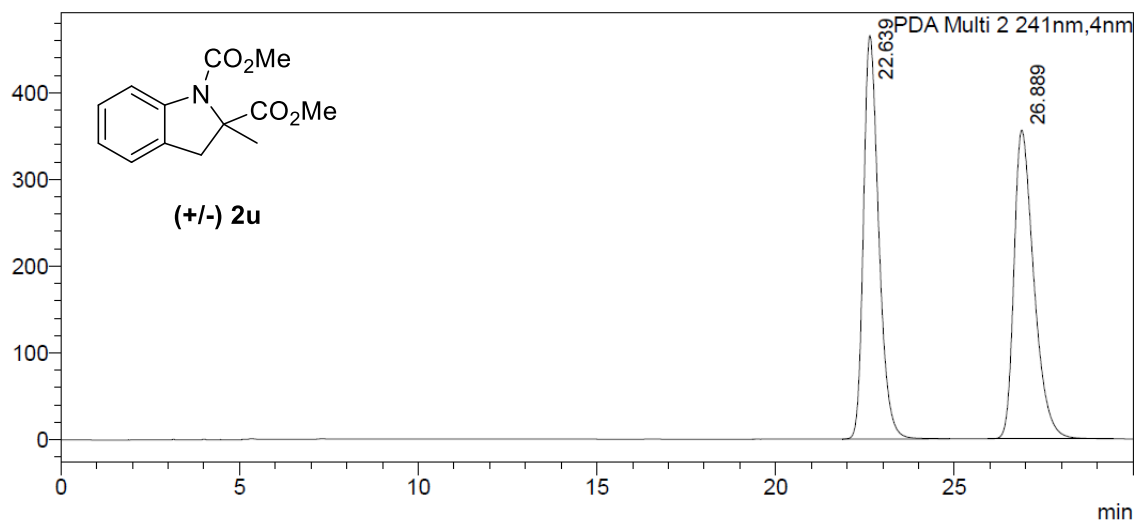

<Peak Table>

PDA Ch2 241nm

| Peak# | Ret. Time | Area     | Height | Area%   |
|-------|-----------|----------|--------|---------|
| 1     | 22.639    | 13795045 | 464981 | 49.980  |
| 2     | 26.889    | 13806168 | 355961 | 50.020  |
| Total |           | 27601213 | 820942 | 100.000 |

mAU

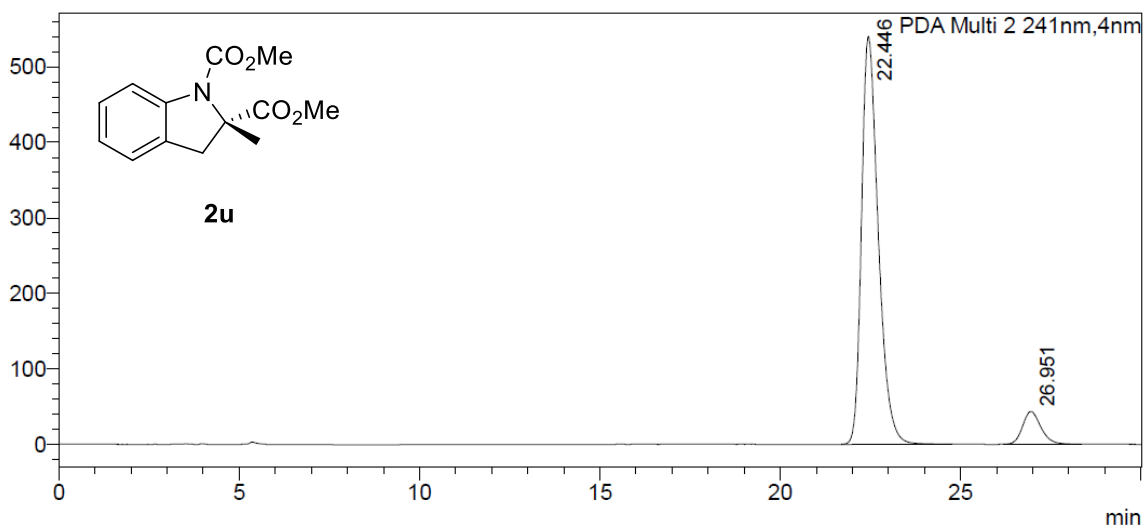

<Peak Table>

PDA Ch2 241nm

| Peak# | Ret. Time | Area     | Height | Area%   |
|-------|-----------|----------|--------|---------|
| 1     | 22.446    | 17440591 | 540449 | 91.902  |
| 2     | 26.951    | 1536726  | 43398  | 8.098   |
| Total |           | 18977317 | 583847 | 100.000 |

<sup>1</sup>H NMR, CDCl<sub>3</sub>, 400 MHz

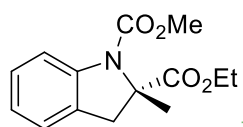

**2v**

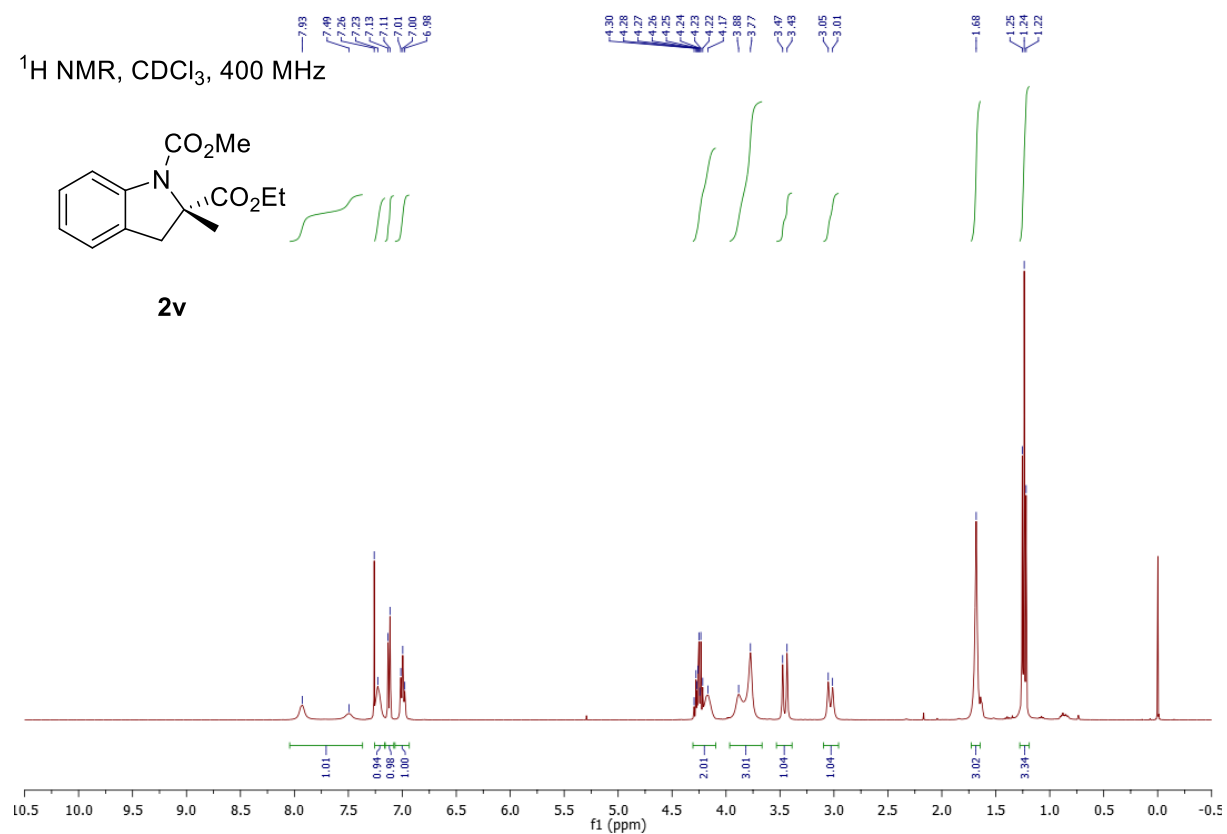

<sup>13</sup>C NMR, CDCl<sub>3</sub>, 101 MHz

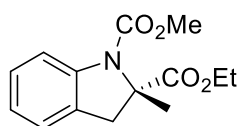

**2v**

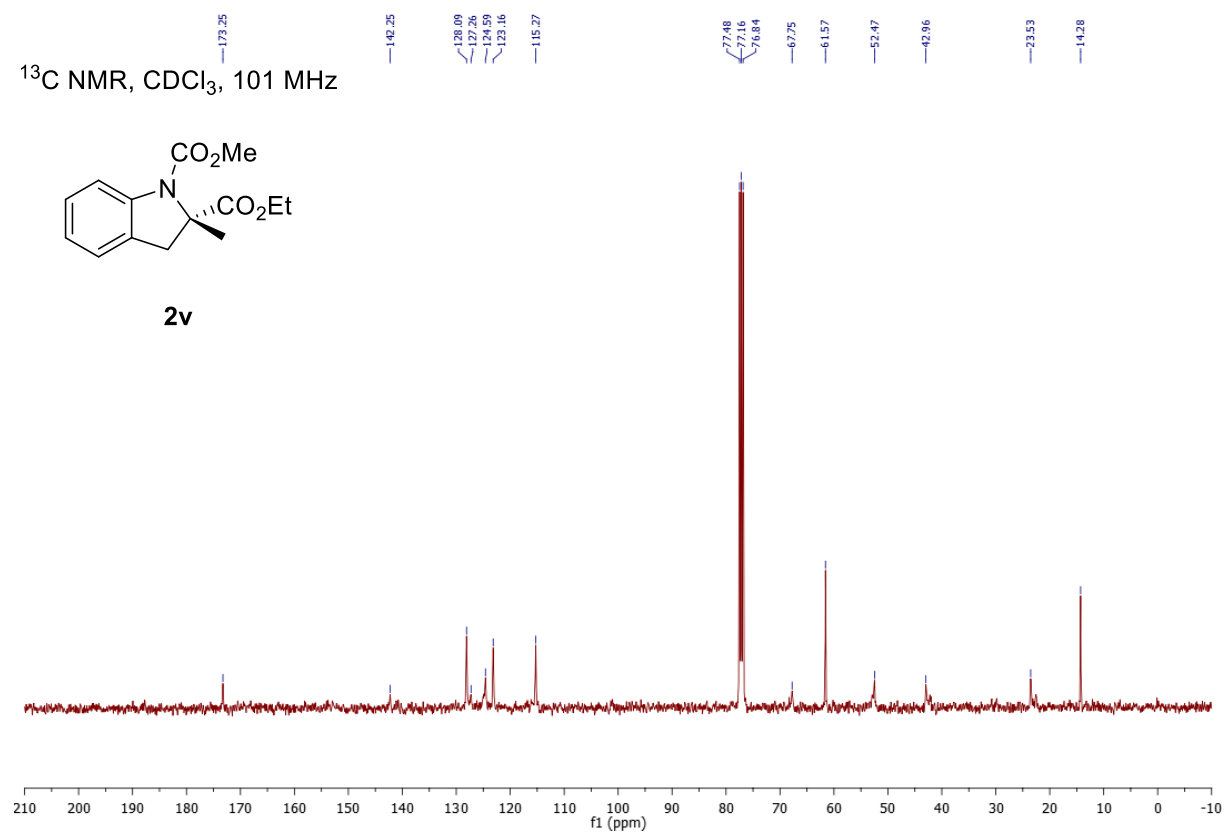

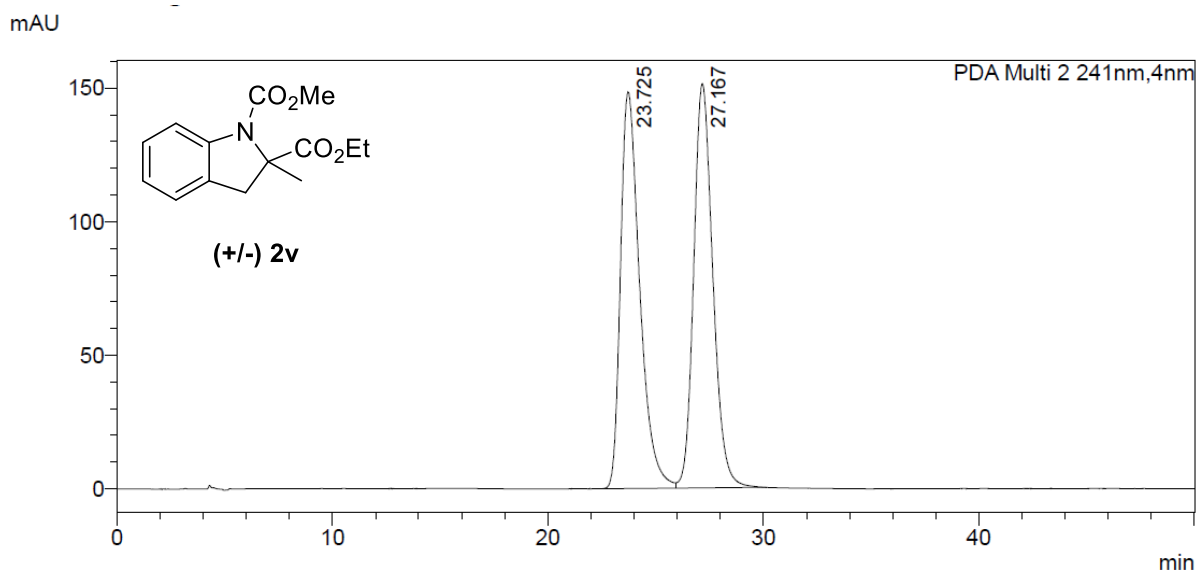

**<Peak Table>**

PDA Ch2 241nm

| Peak# | Ret. Time | Area     | Height | Area%   |
|-------|-----------|----------|--------|---------|
| 1     | 23.725    | 9192792  | 148374 | 49.636  |
| 2     | 27.167    | 9327585  | 151262 | 50.364  |
| Total |           | 18520377 | 299636 | 100.000 |

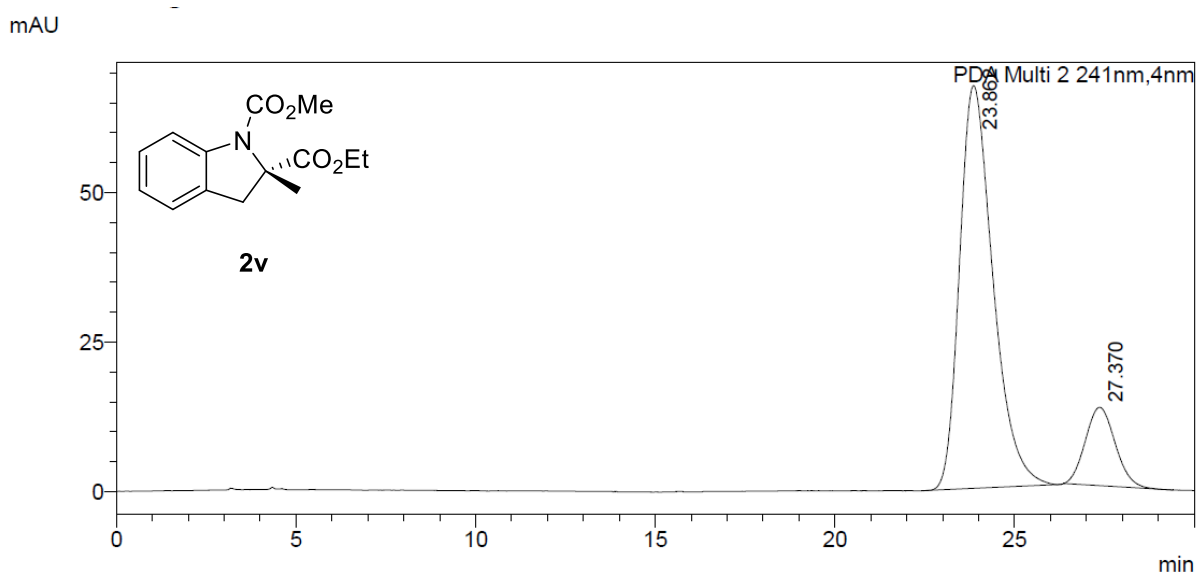

**<Peak Table>**

PDA Ch2 241nm

| Peak# | Ret. Time | Area    | Height | Area%   |
|-------|-----------|---------|--------|---------|
| 1     | 23.862    | 4366582 | 67415  | 85.165  |
| 2     | 27.370    | 760595  | 13115  | 14.835  |
| Total |           | 5127177 | 80529  | 100.000 |



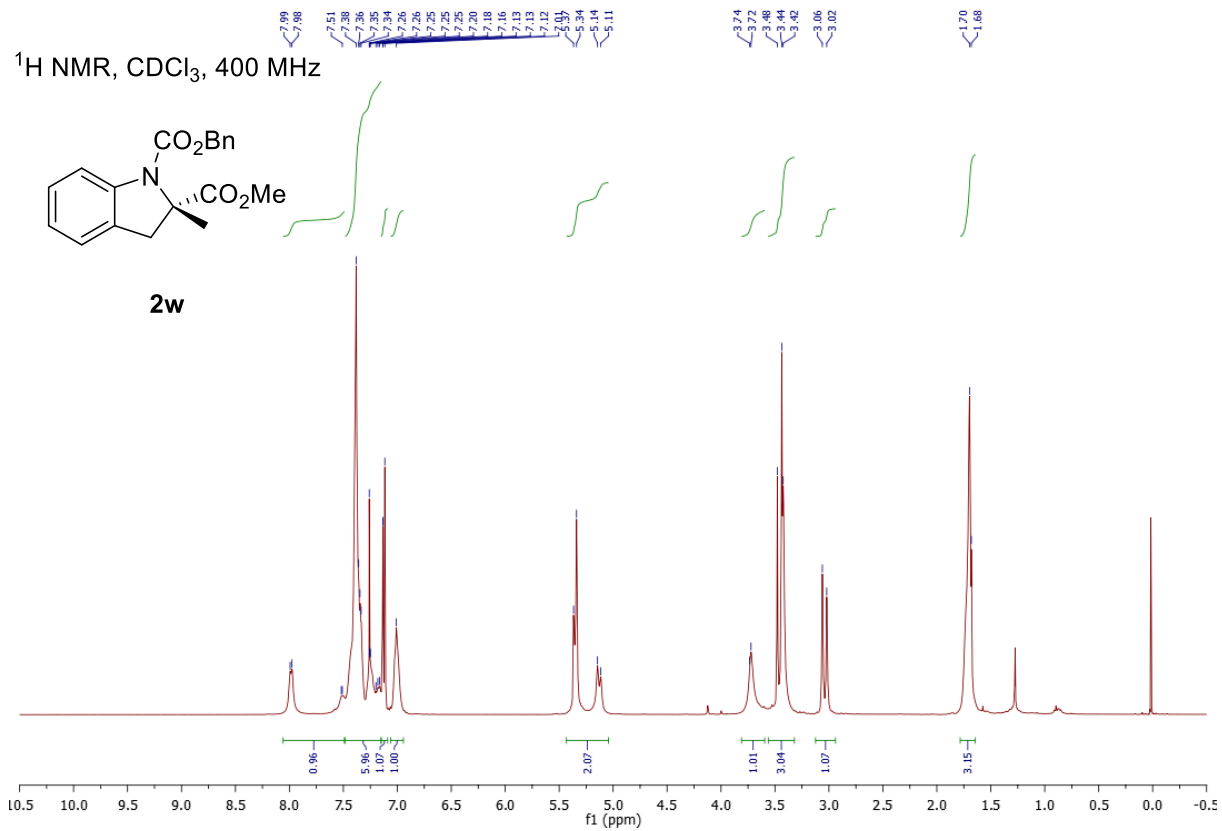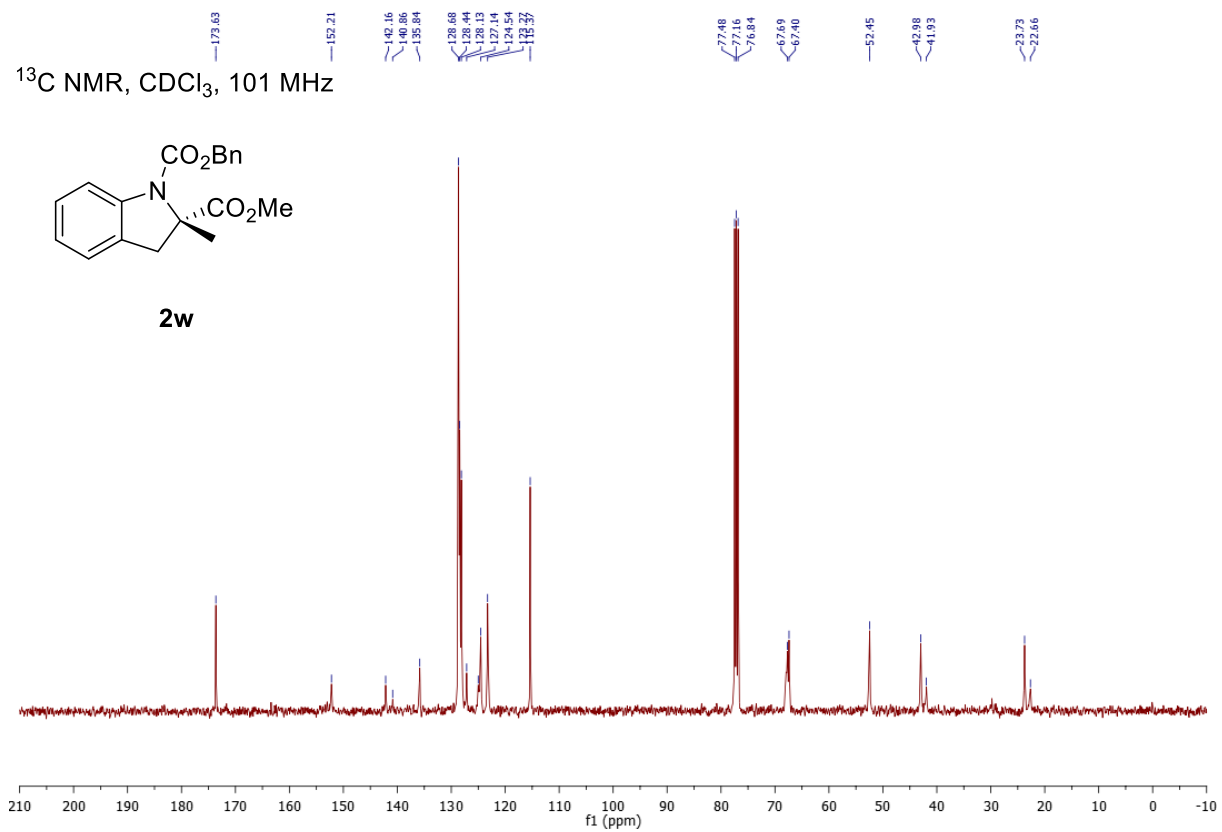

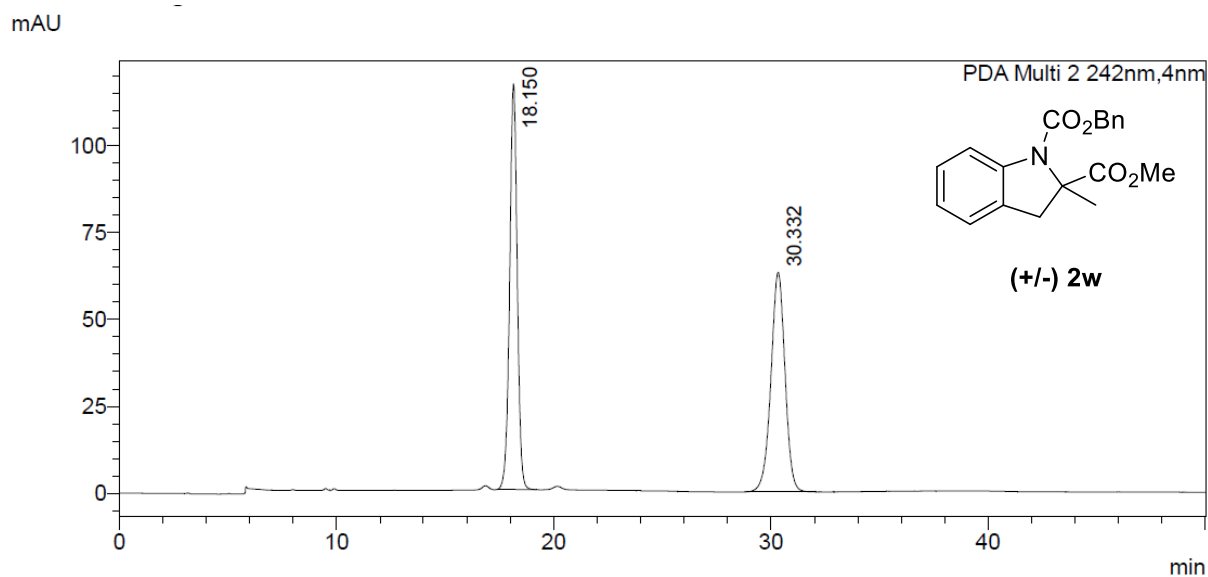

**<Peak Table>**

PDA Ch2 242nm

| Peak# | Ret. Time | Area    | Height | Area%   |
|-------|-----------|---------|--------|---------|
| 1     | 18.150    | 2834687 | 116518 | 49.882  |
| 2     | 30.332    | 2848120 | 63117  | 50.118  |
| Total |           | 5682807 | 179635 | 100.000 |

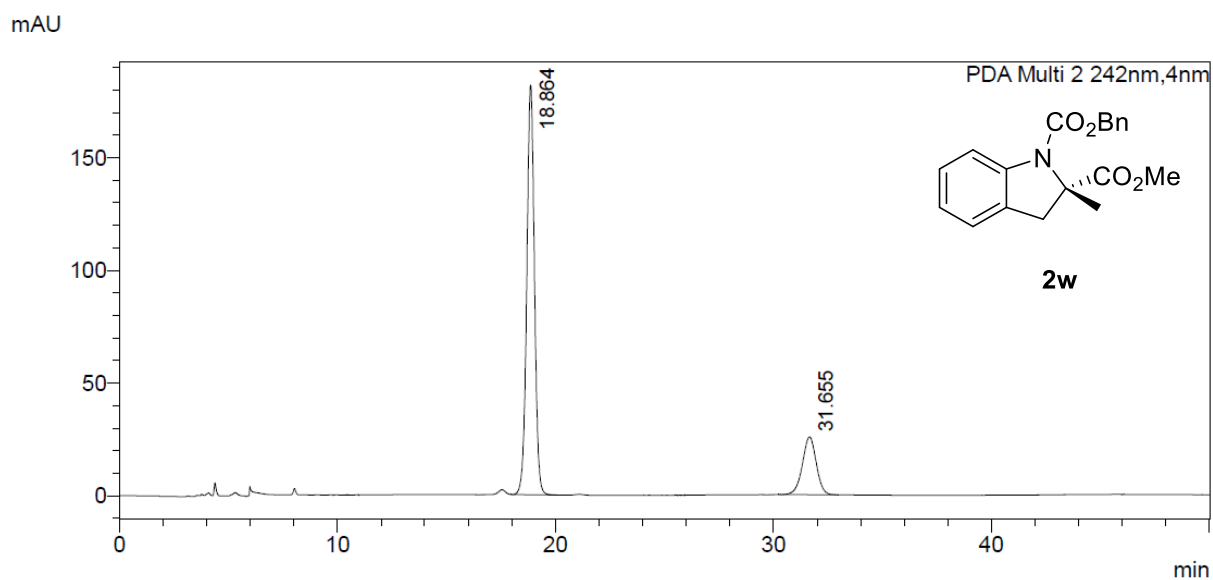

**<Peak Table>**

PDA Ch2 242nm

| Peak# | Ret. Time | Area    | Height | Area%   |
|-------|-----------|---------|--------|---------|
| 1     | 18.864    | 4455643 | 181857 | 79.605  |
| 2     | 31.655    | 1141547 | 25683  | 20.395  |
| Total |           | 5597190 | 207539 | 100.000 |

<sup>1</sup>H NMR, CDCl<sub>3</sub>, 400 MHz

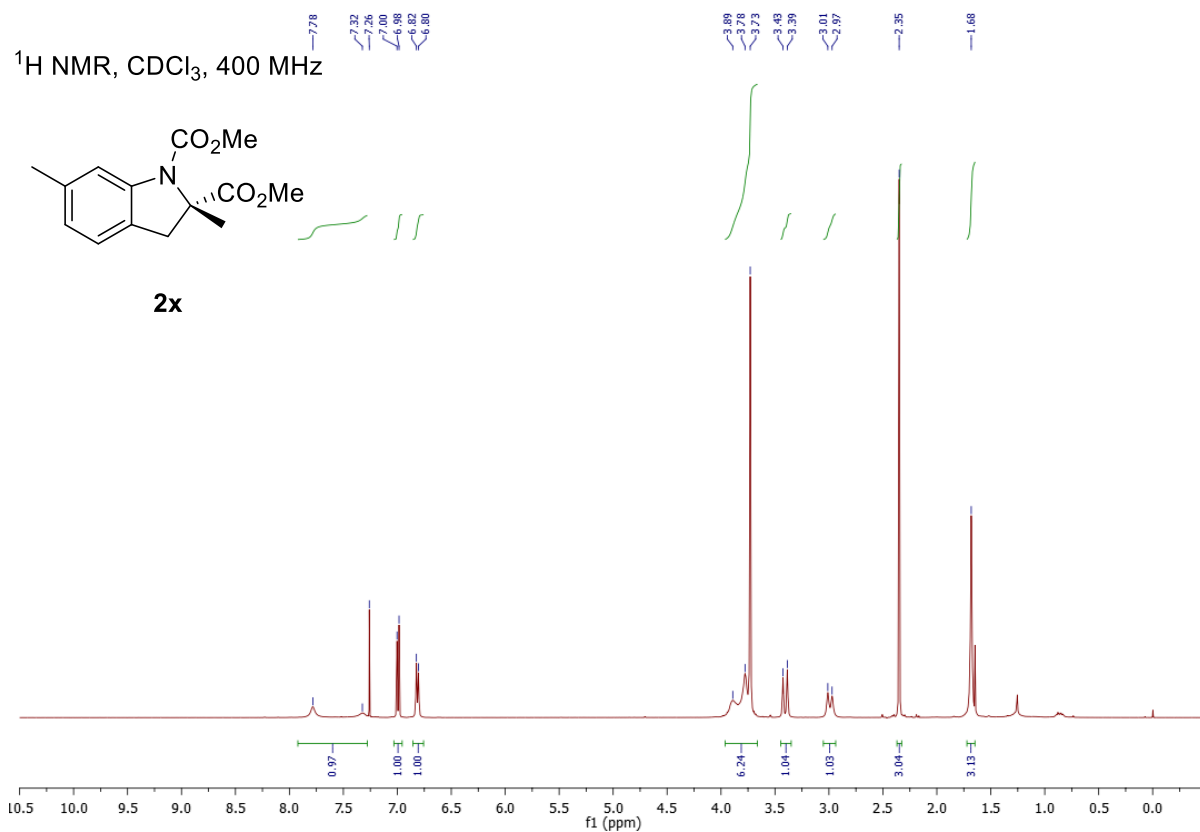

<sup>13</sup>C NMR, CDCl<sub>3</sub>, 101 MHz

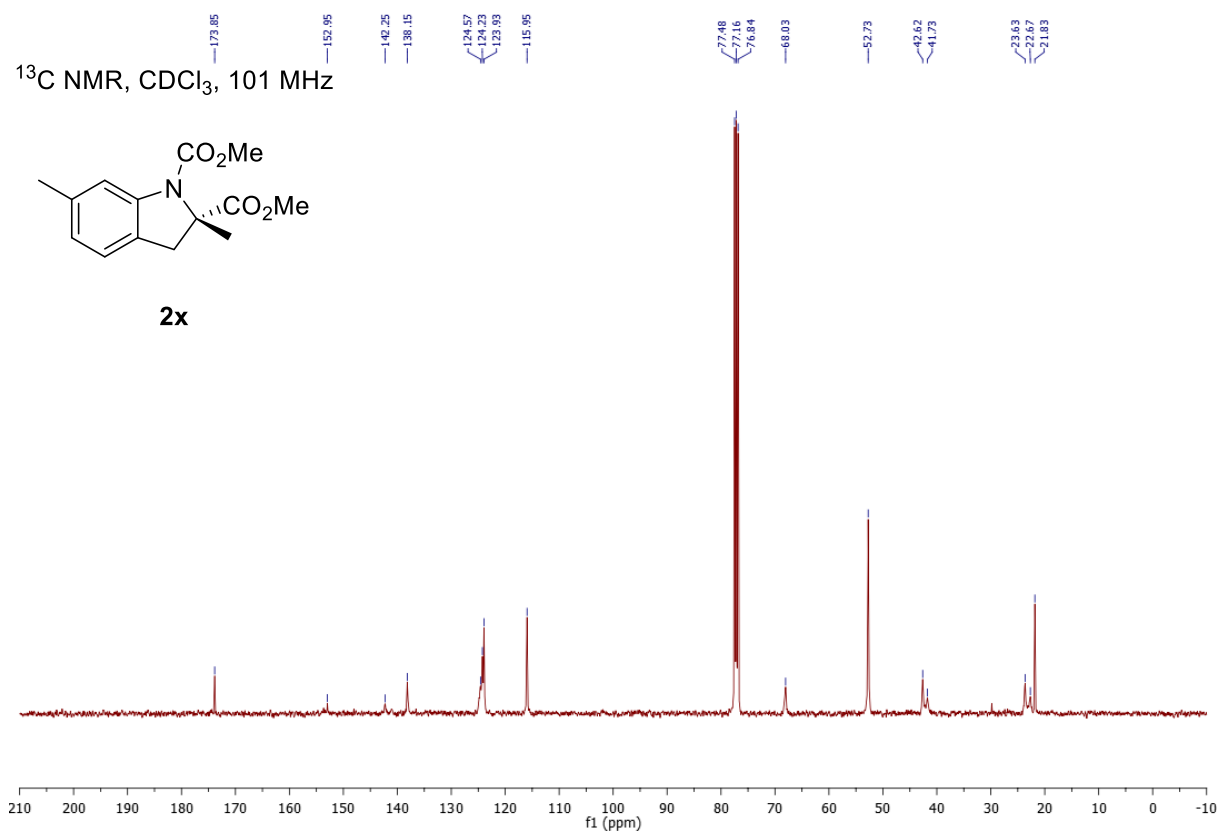

mAU

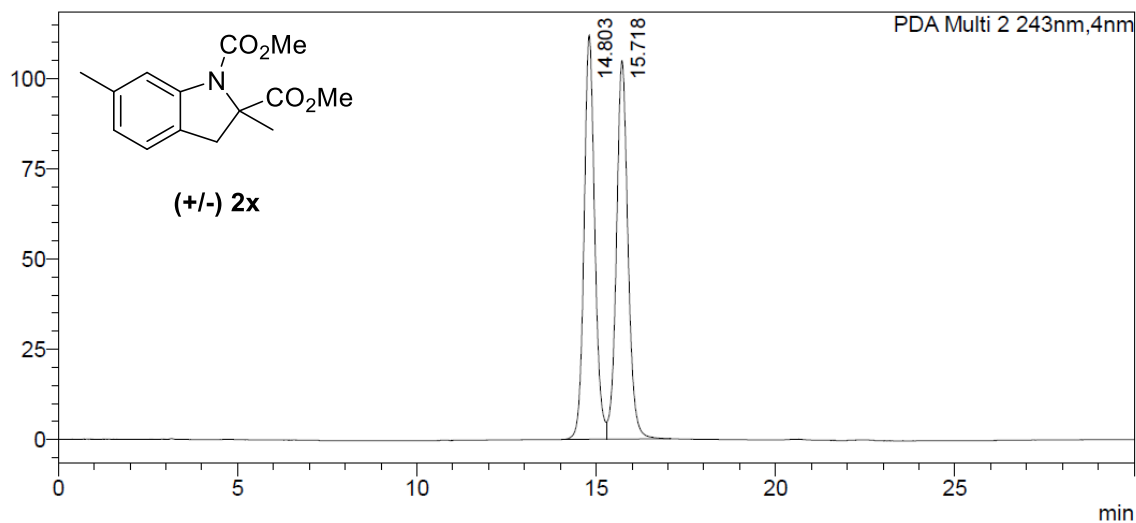

<Peak Table>

PDA Ch2 243nm

| Peak# | Ret. Time | Area    | Height | Area%   |
|-------|-----------|---------|--------|---------|
| 1     | 14.803    | 2318719 | 112054 | 49.623  |
| 2     | 15.718    | 2353956 | 104882 | 50.377  |
| Total |           | 4672675 | 216936 | 100.000 |

mAU

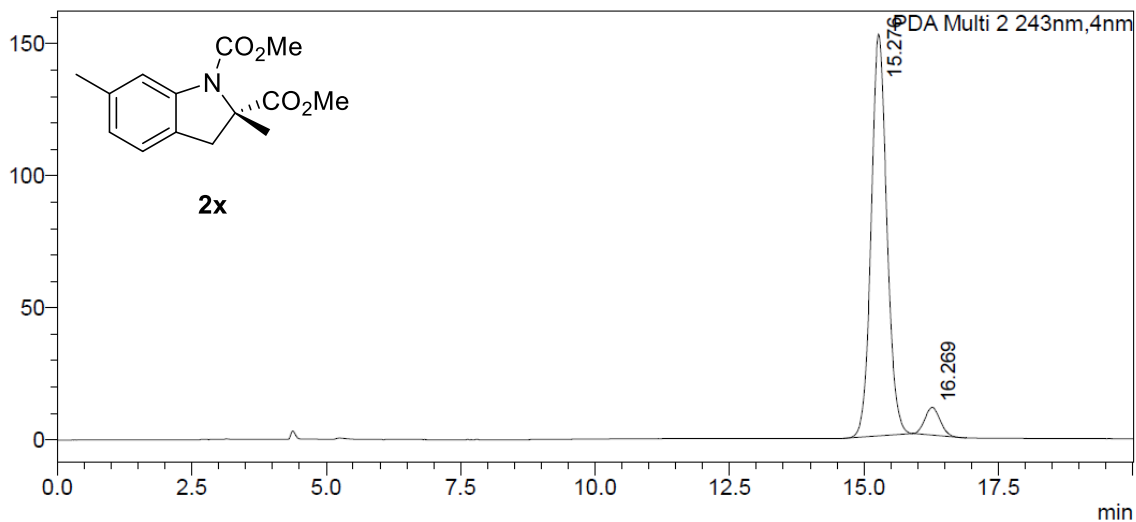

<Peak Table>

PDA Ch2 243nm

| Peak# | Ret. Time | Area    | Height | Area%   |
|-------|-----------|---------|--------|---------|
| 1     | 15.276    | 3087051 | 152101 | 93.724  |
| 2     | 16.269    | 206704  | 10486  | 6.276   |
| Total |           | 3293755 | 162588 | 100.000 |

<sup>1</sup>H NMR, CDCl<sub>3</sub>, 400 MHz

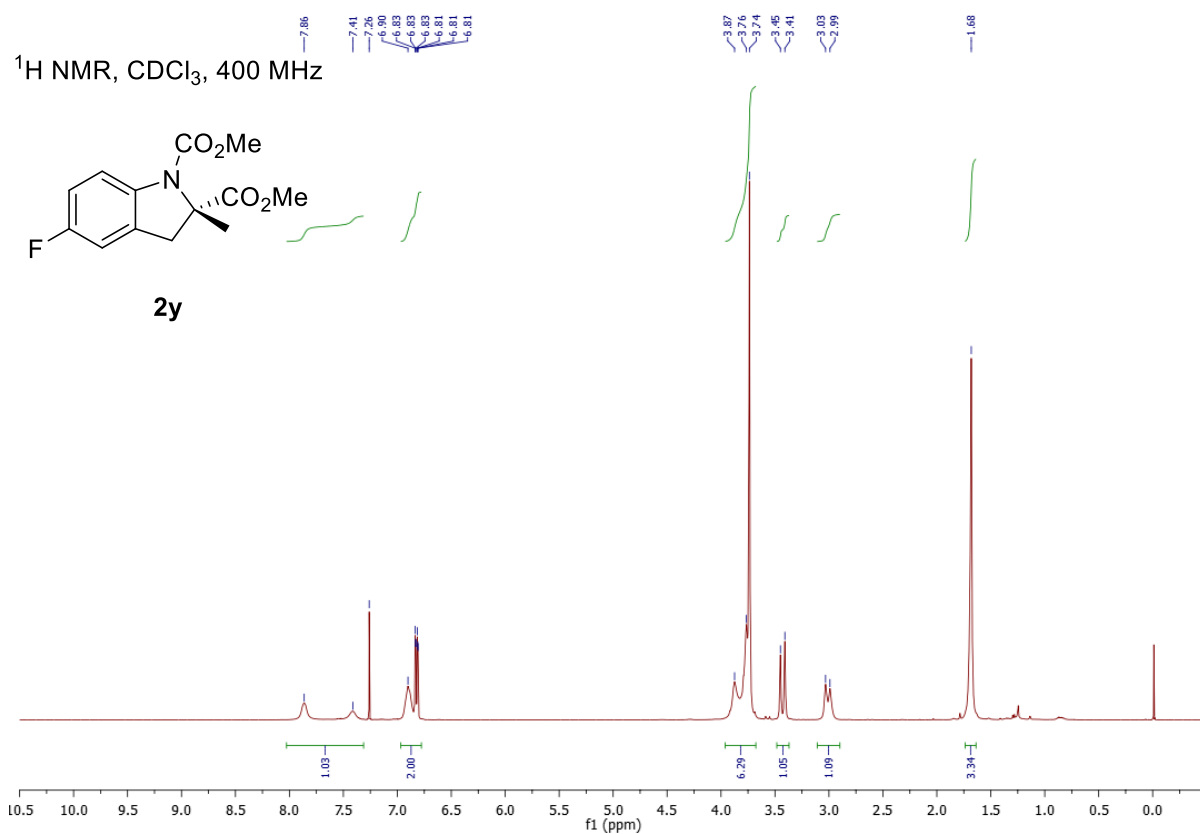

<sup>13</sup>C NMR, CDCl<sub>3</sub>, 101 MHz

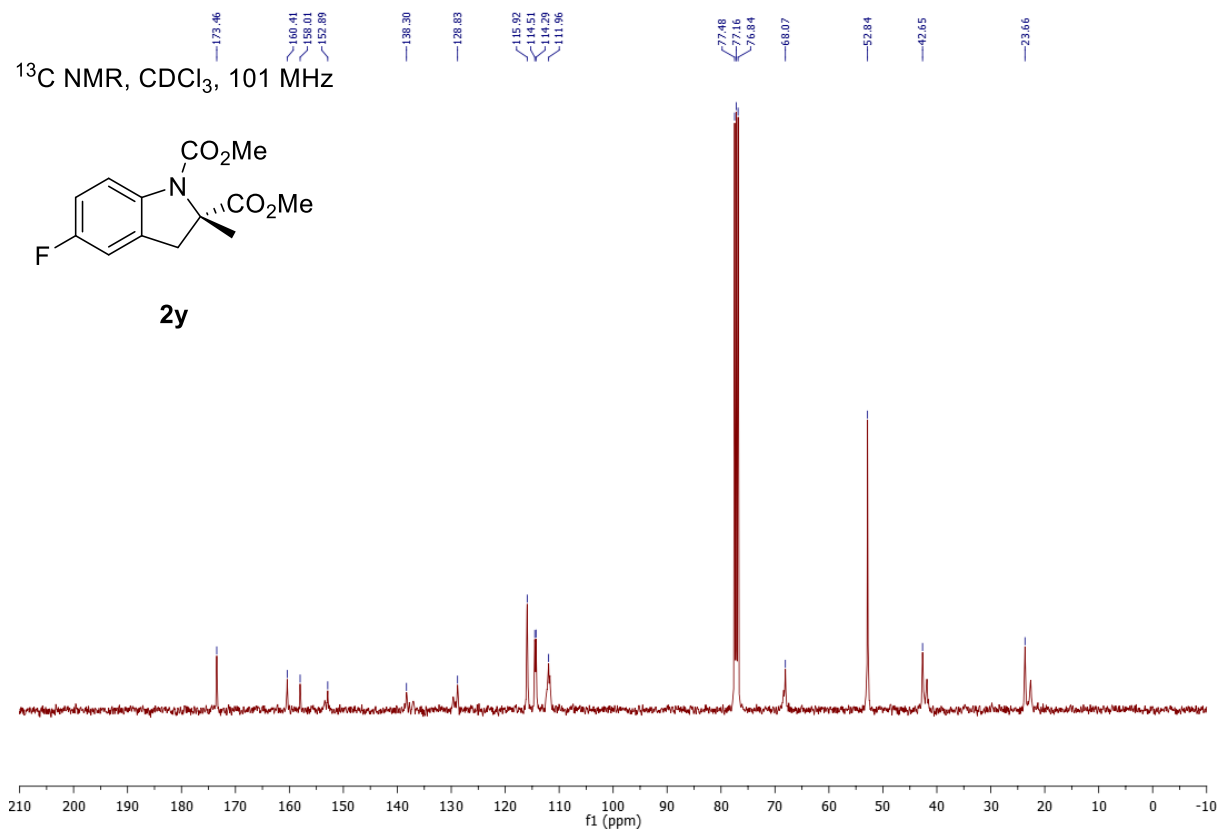

$^{19}\text{F}$  NMR,  $\text{CDCl}_3$ , 376 MHz

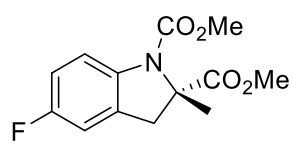

**2y**

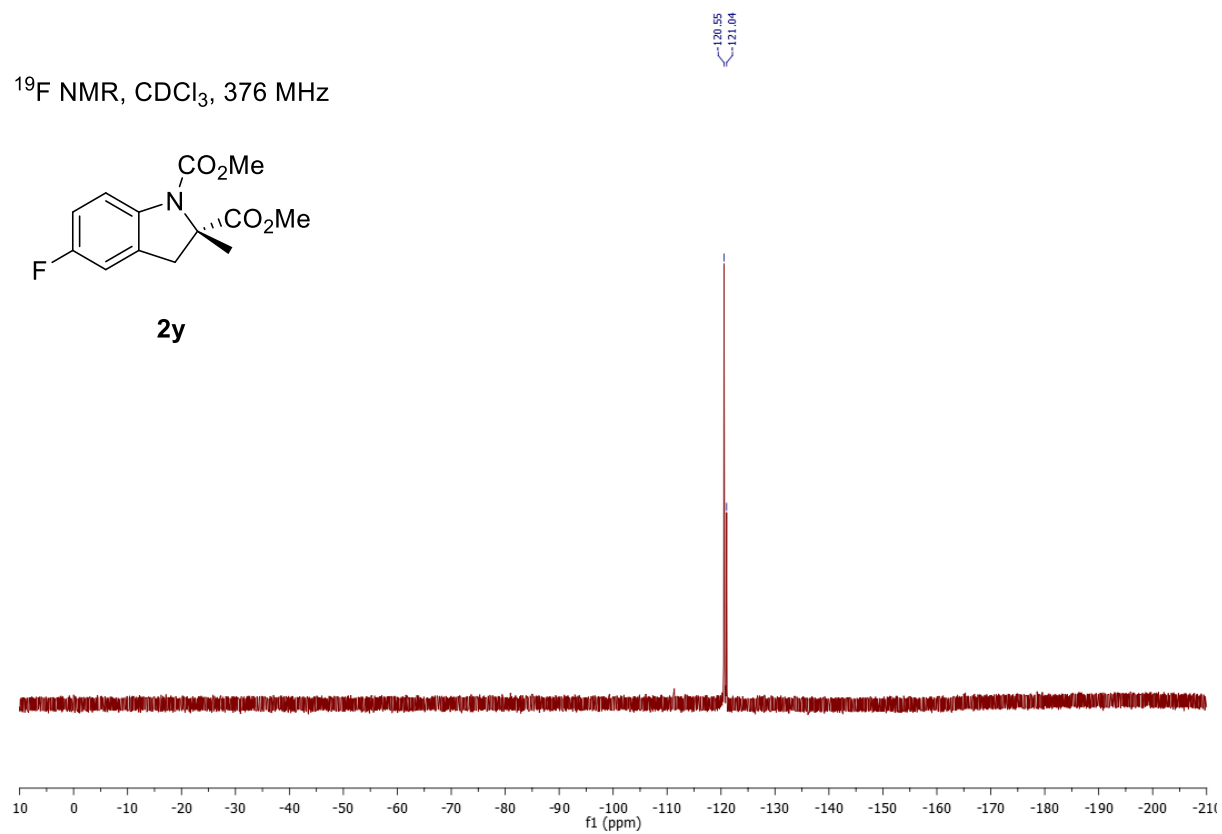

mAU

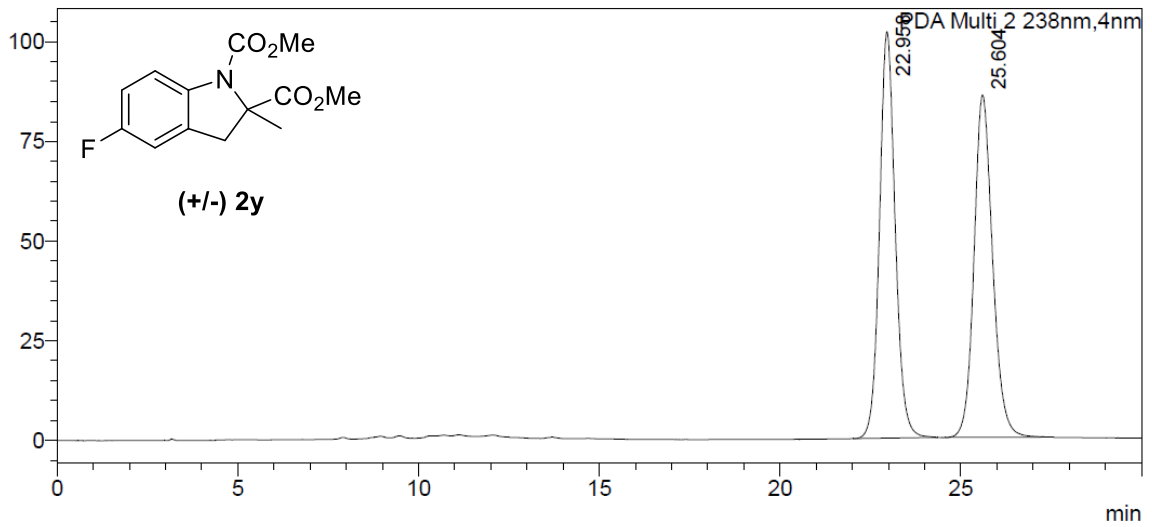

<Peak Table>

PDA Ch2 238nm

| Peak# | Ret. Time | Area    | Height | Area%   |
|-------|-----------|---------|--------|---------|
| 1     | 22.958    | 3087898 | 101883 | 50.068  |
| 2     | 25.604    | 3079454 | 85857  | 49.932  |
| Total |           | 6167351 | 187739 | 100.000 |

mAU

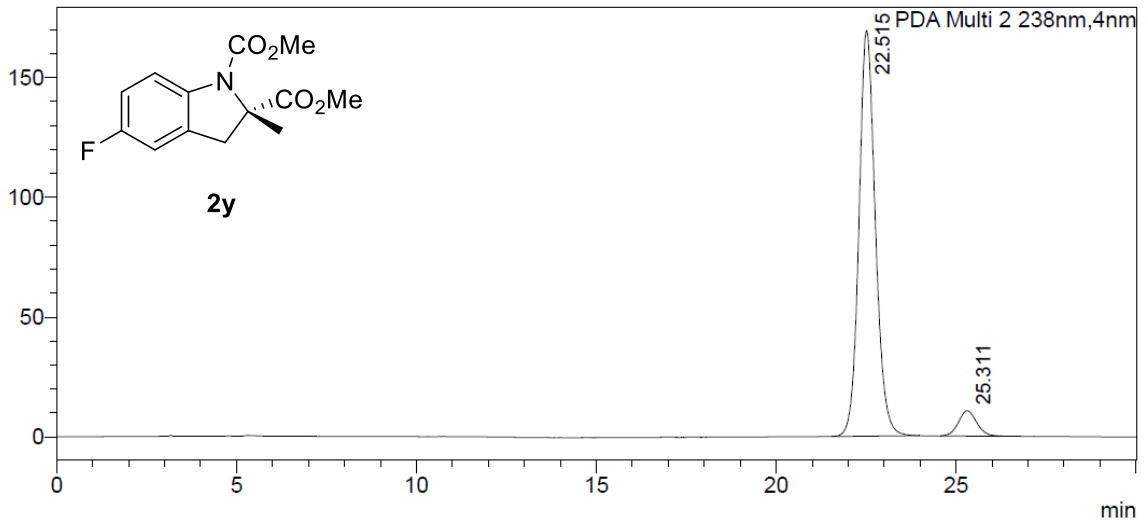

<Peak Table>

PDA Ch2 238nm

| Peak# | Ret. Time | Area    | Height | Area%   |
|-------|-----------|---------|--------|---------|
| 1     | 22.515    | 5370517 | 169261 | 93.505  |
| 2     | 25.311    | 373022  | 10558  | 6.495   |
| Total |           | 5743539 | 179820 | 100.000 |

<sup>1</sup>H NMR, CDCl<sub>3</sub>, 400 MHz

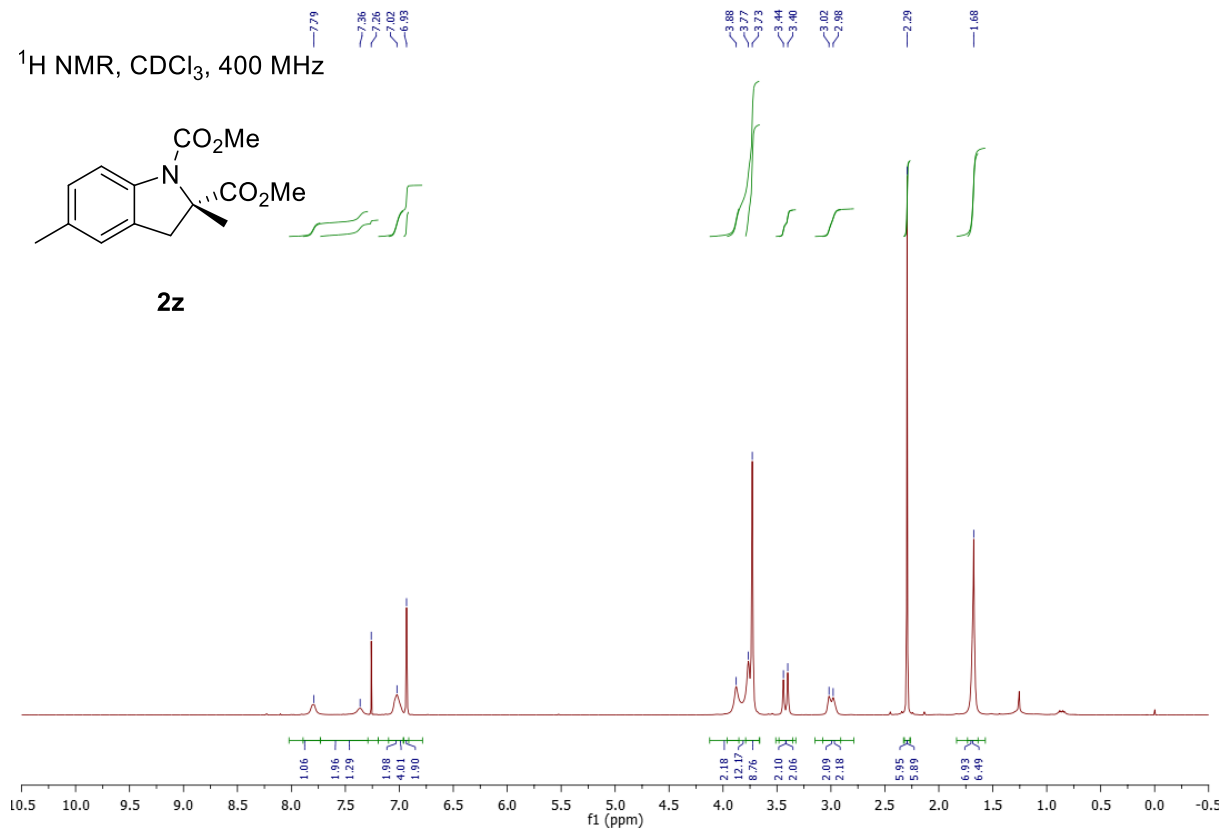

<sup>13</sup>C NMR, CDCl<sub>3</sub>, 101 MHz

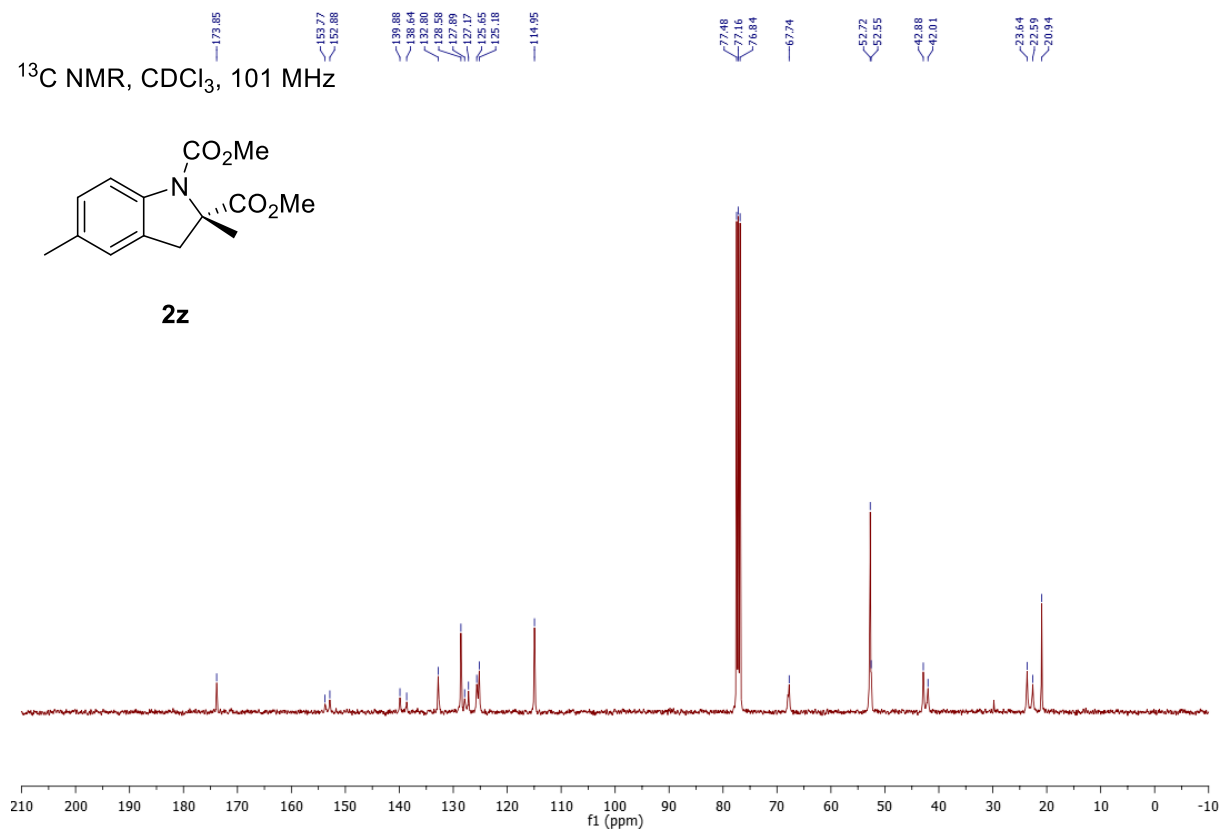



mAU

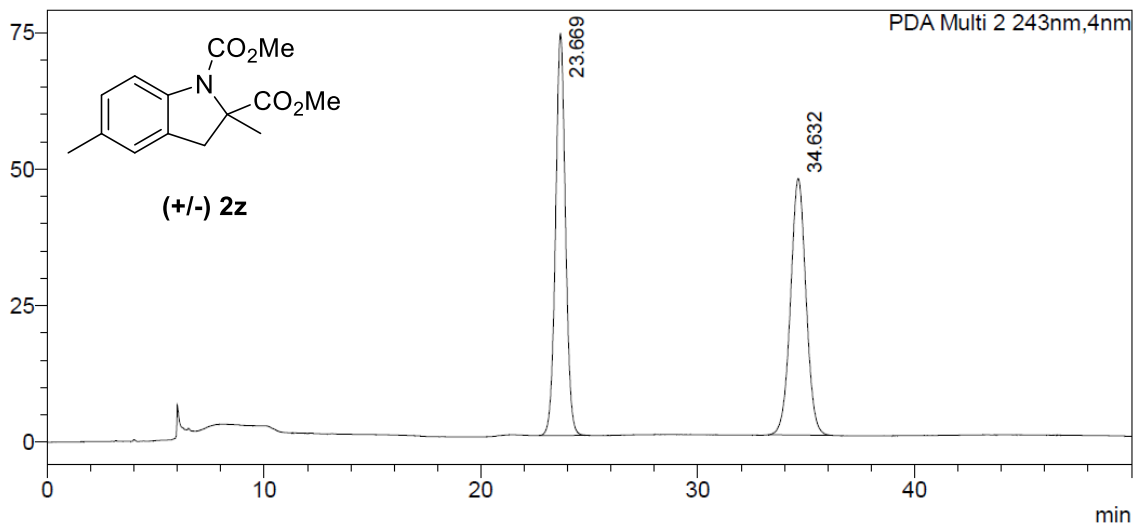

<Peak Table>

PDA Ch2 243nm

| Peak# | Ret. Time | Area    | Height | Area%   |
|-------|-----------|---------|--------|---------|
| 1     | 23.669    | 2345104 | 73597  | 50.090  |
| 2     | 34.632    | 2336675 | 46991  | 49.910  |
| Total |           | 4681779 | 120588 | 100.000 |

mAU

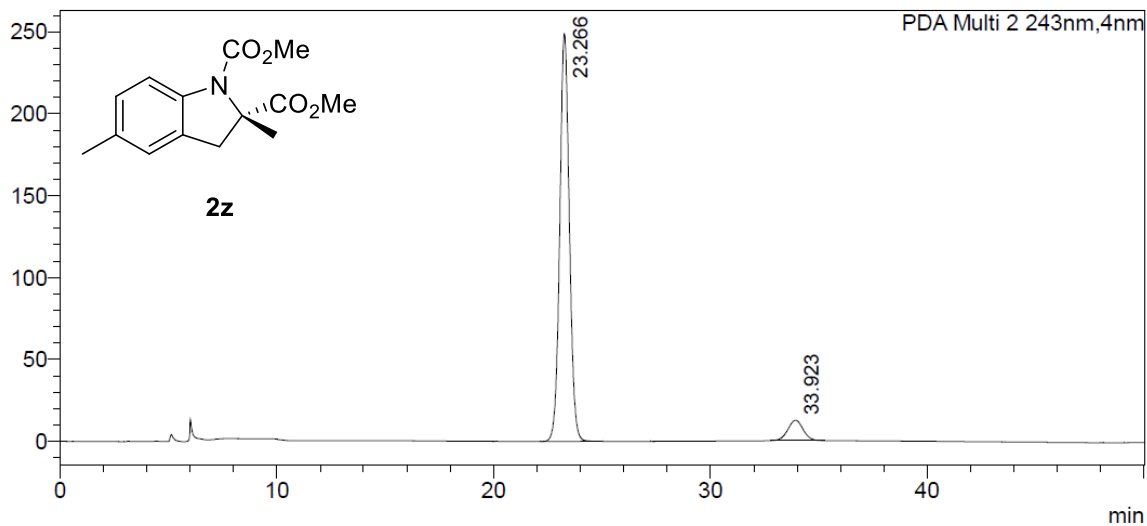

<Peak Table>

PDA Ch2 243nm

| Peak# | Ret. Time | Area    | Height | Area%   |
|-------|-----------|---------|--------|---------|
| 1     | 23.266    | 7666168 | 248757 | 92.588  |
| 2     | 33.923    | 613704  | 12505  | 7.412   |
| Total |           | 8279872 | 261262 | 100.000 |

<sup>1</sup>H NMR, CDCl<sub>3</sub>, 400 MHz

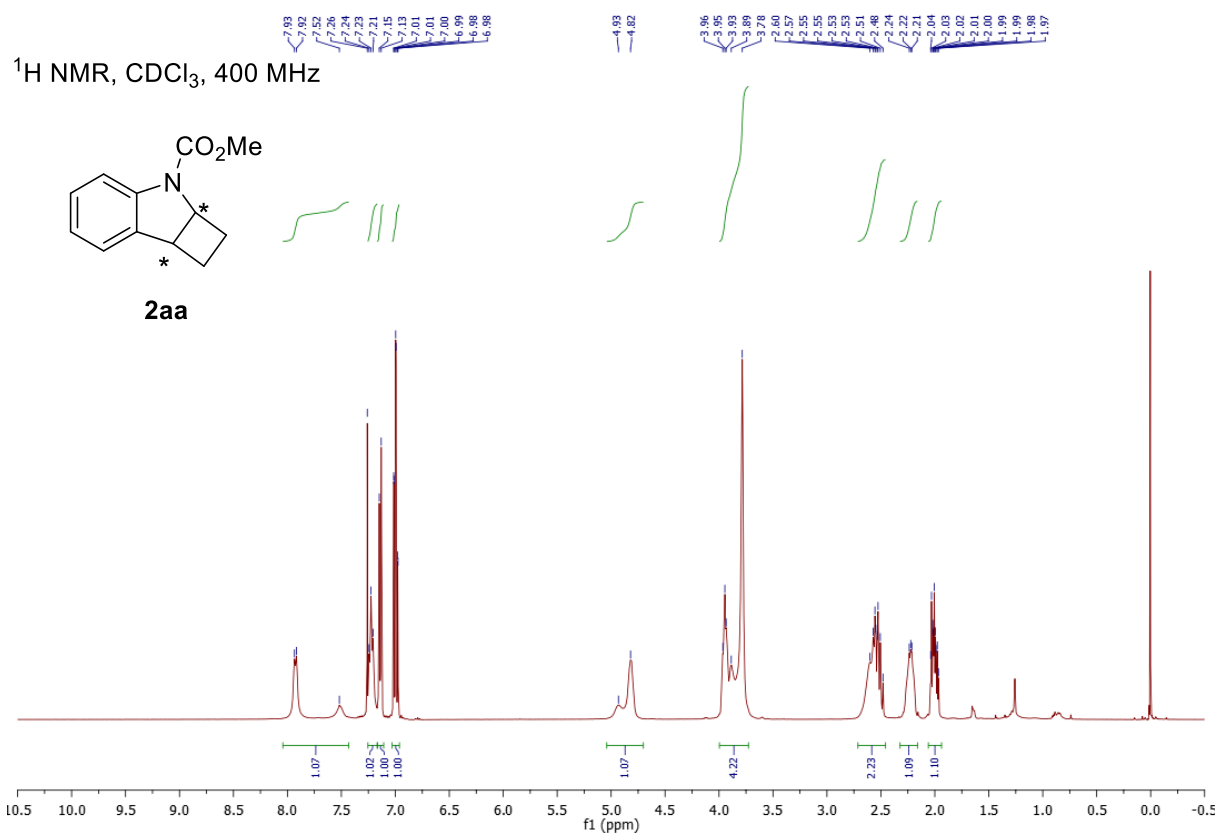

<sup>13</sup>C NMR, CDCl<sub>3</sub>, 101 MHz

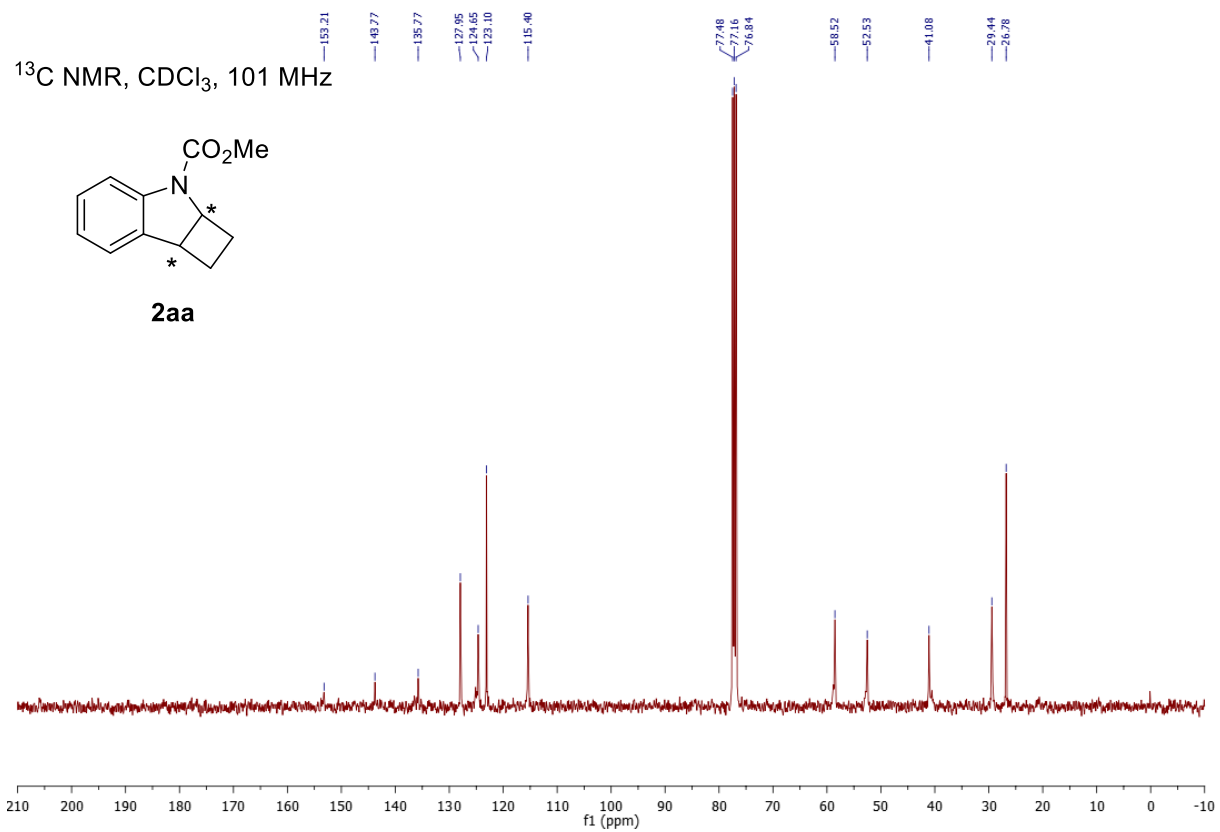

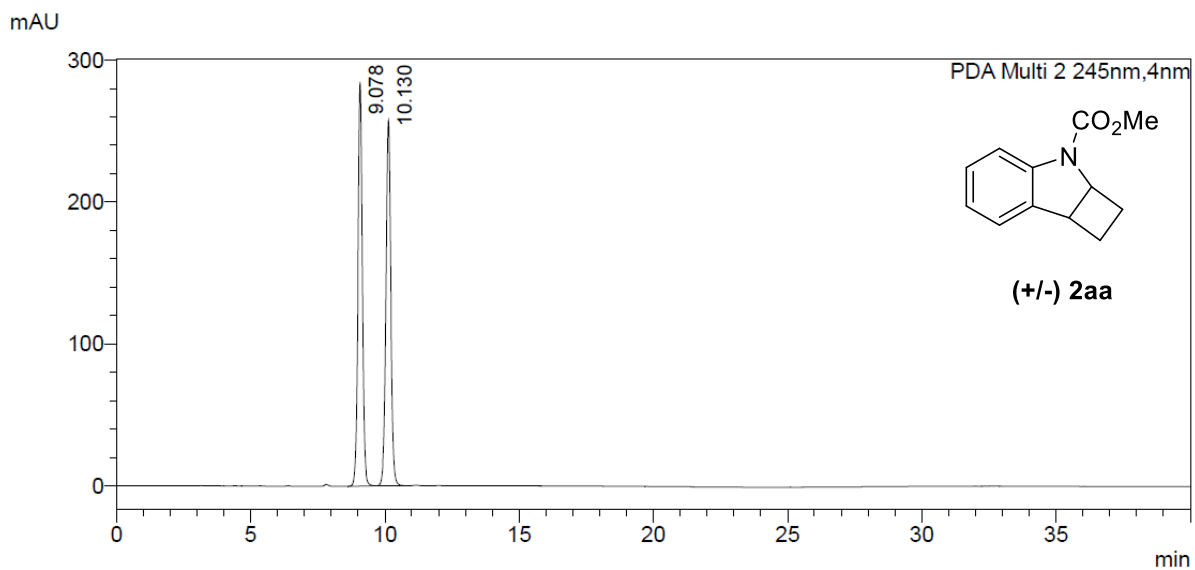

**<Peak Table>**

PDA Ch2 245nm

| Peak# | Ret. Time | Area    | Height | Area%   |
|-------|-----------|---------|--------|---------|
| 1     | 9.078     | 3237008 | 284756 | 49.930  |
| 2     | 10.130    | 3246137 | 257569 | 50.070  |
| Total |           | 6483145 | 542325 | 100.000 |

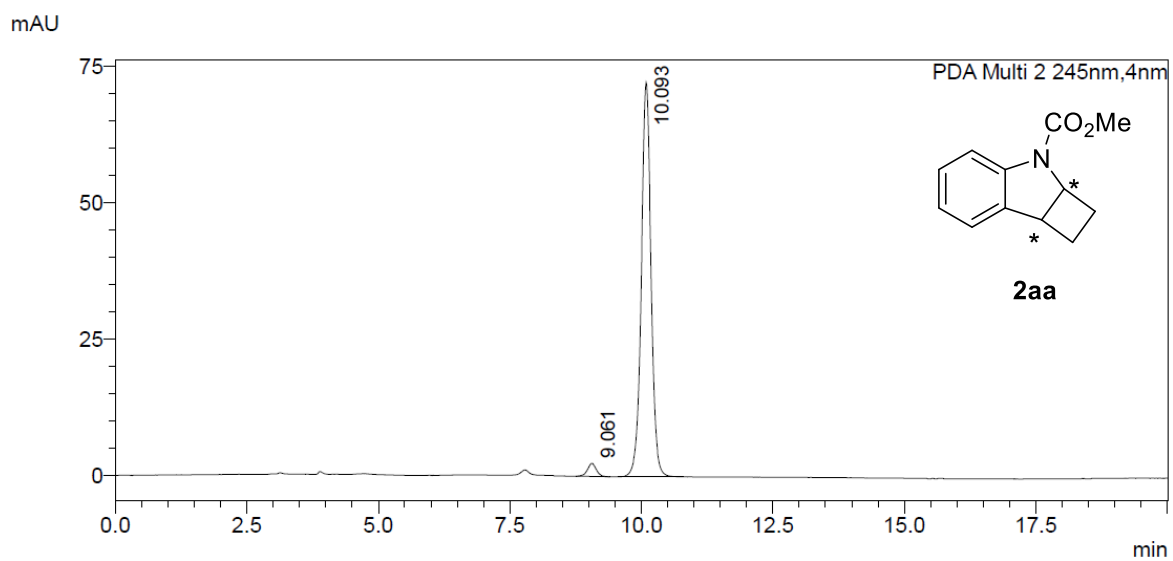

**<Peak Table>**

PDA Ch2 245nm

| Peak# | Ret. Time | Area   | Height | Area%   |
|-------|-----------|--------|--------|---------|
| 1     | 9.061     | 27525  | 2365   | 2.878   |
| 2     | 10.093    | 928984 | 72297  | 97.122  |
| Total |           | 956509 | 74661  | 100.000 |

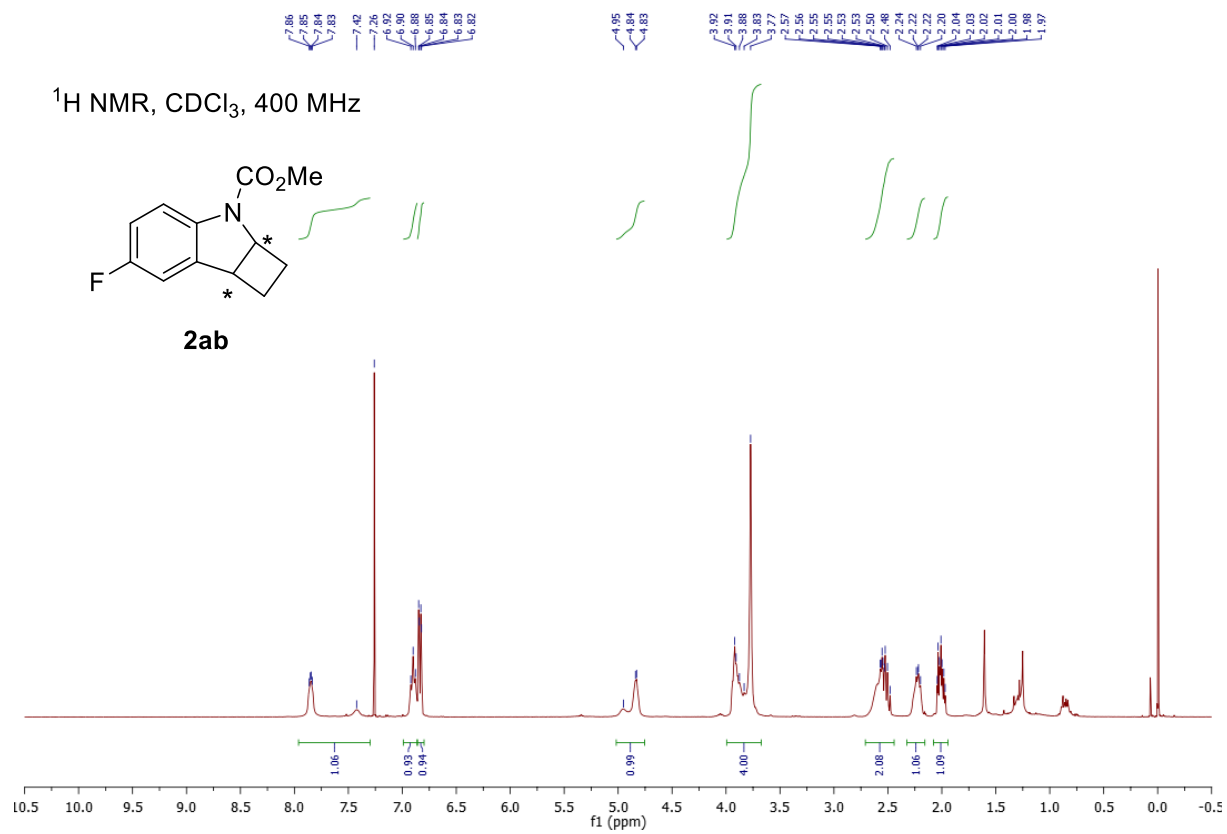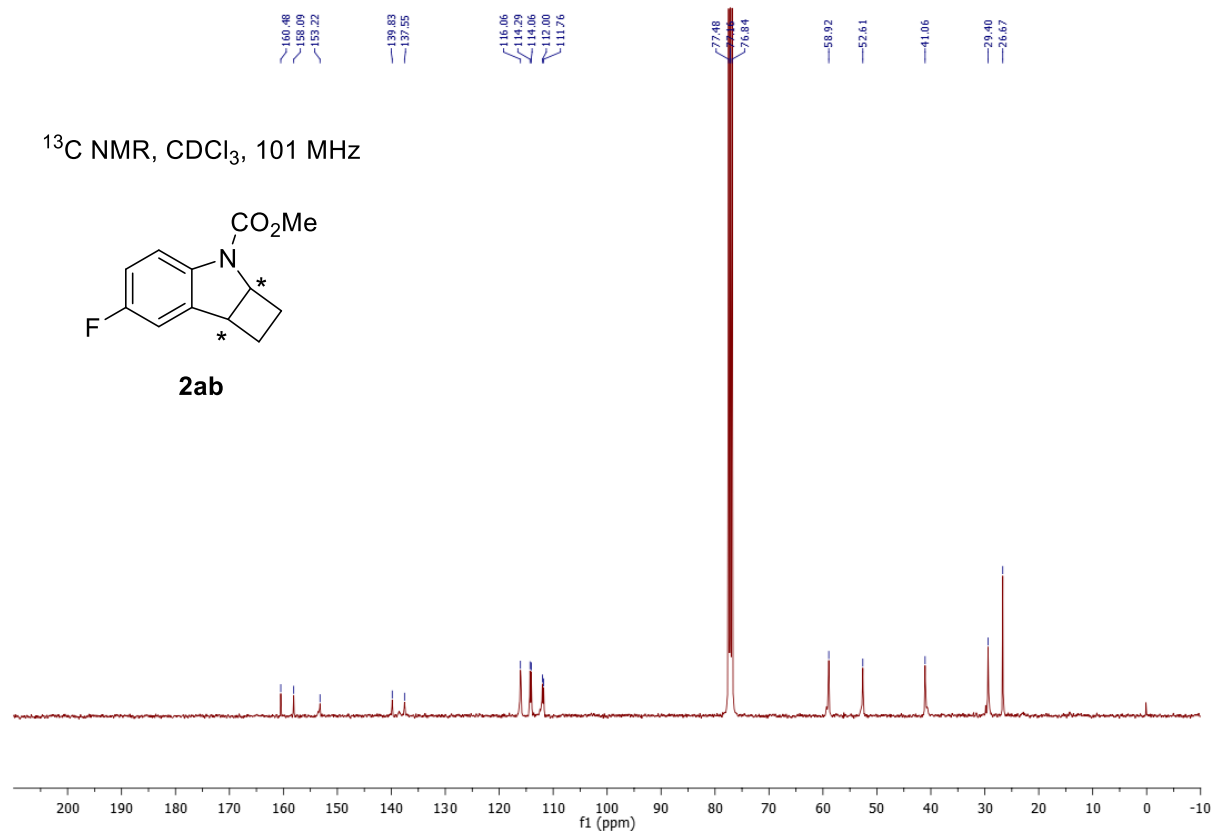

$^{19}\text{F}$  NMR,  $\text{CDCl}_3$ , 376 MHz

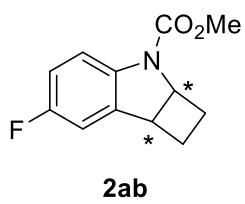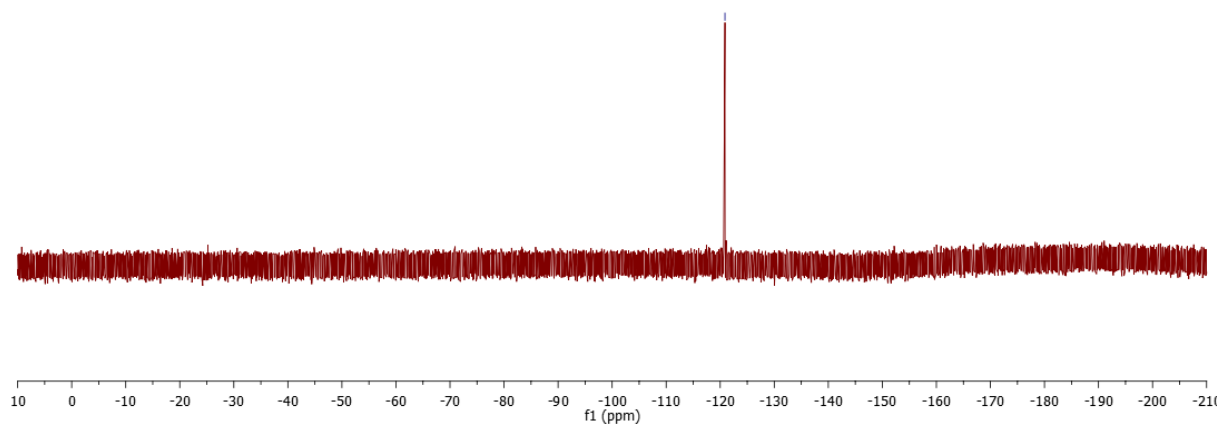

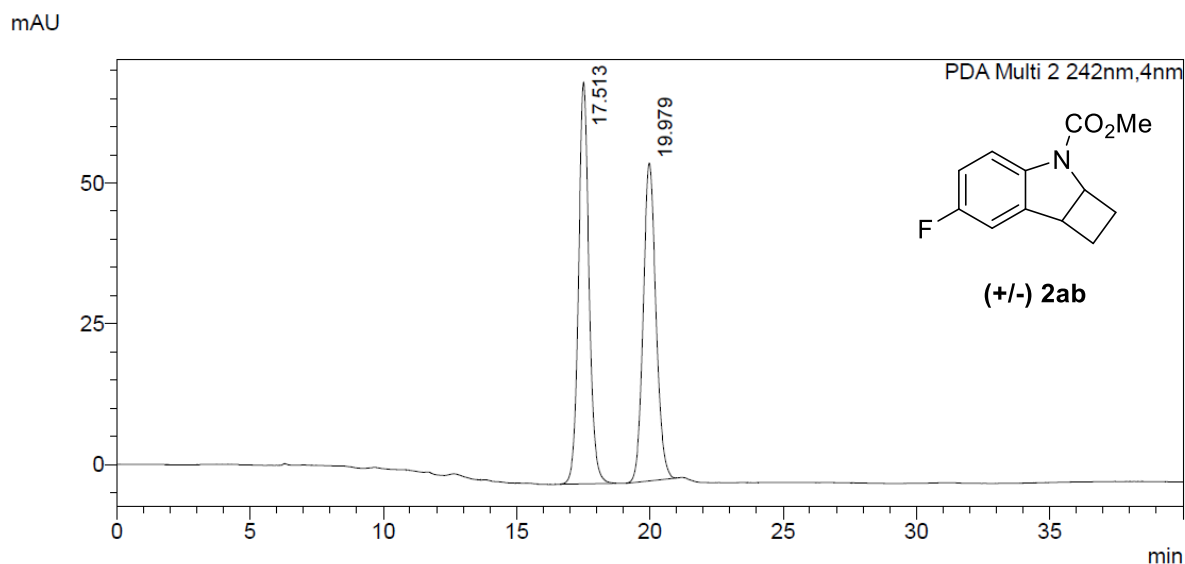

**<Peak Table>**

PDA Ch2 242nm

| Peak# | Ret. Time | Area    | Height | Area%   |
|-------|-----------|---------|--------|---------|
| 1     | 17.513    | 1951867 | 71317  | 50.961  |
| 2     | 19.979    | 1878217 | 56480  | 49.039  |
| Total |           | 3830085 | 127797 | 100.000 |

After a first column chromatography (EA:pentane = 1:90)

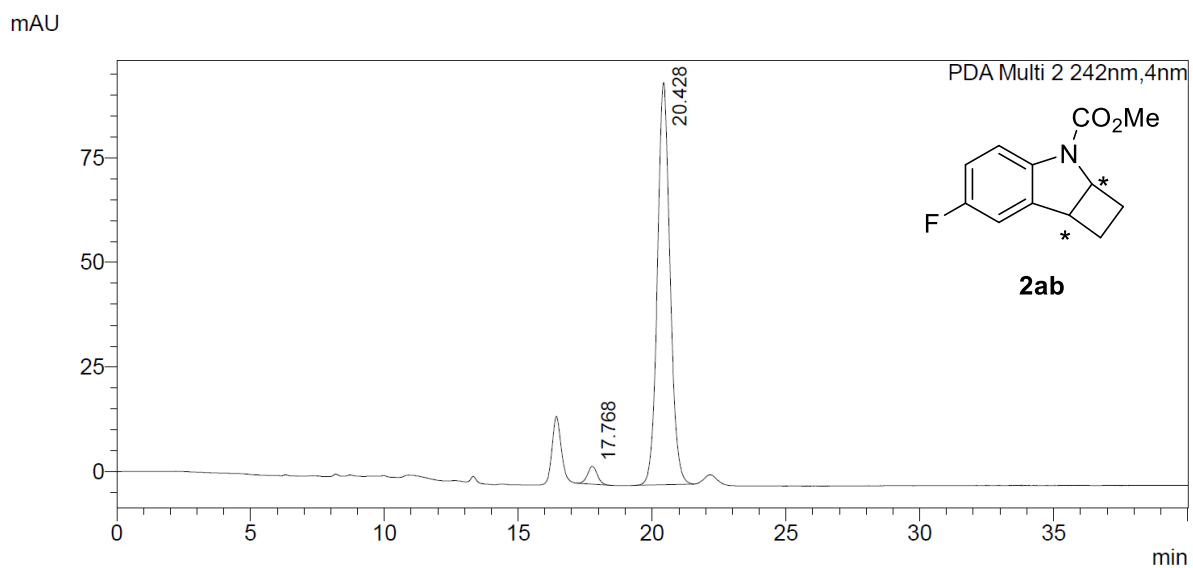

**<Peak Table>**

PDA Ch2 242nm

| Peak# | Ret. Time | Area    | Height | Area%   |
|-------|-----------|---------|--------|---------|
| 1     | 17.768    | 109127  | 4288   | 3.344   |
| 2     | 20.428    | 3153935 | 96029  | 96.656  |
| Total |           | 3263063 | 100317 | 100.000 |

After two Pre-TLC (Et<sub>2</sub>O:pentane = 1:50 and DCM:pentane = 1:9)

mAU

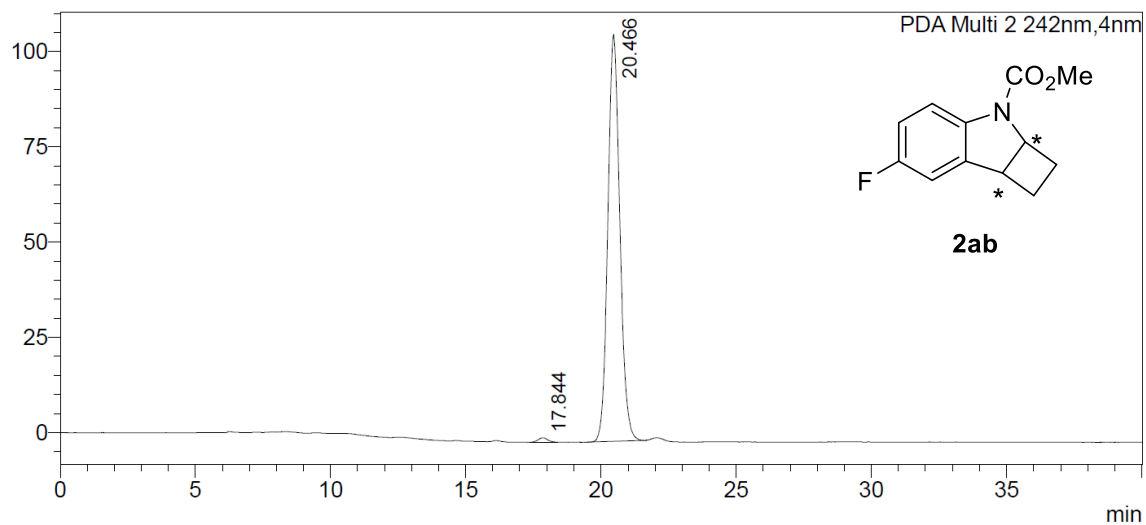

**<Peak Table>**

PDA Ch2 242nm

| Peak# | Ret. Time | Area    | Height | Area%   |
|-------|-----------|---------|--------|---------|
| 1     | 17.844    | 27446   | 1145   | 0.826   |
| 2     | 20.466    | 3293650 | 106748 | 99.174  |
| Total |           | 3321096 | 107893 | 100.000 |

<sup>1</sup>H NMR, CDCl<sub>3</sub>, 400 MHz

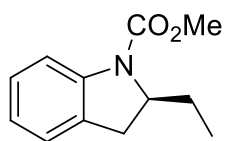

**2ac**

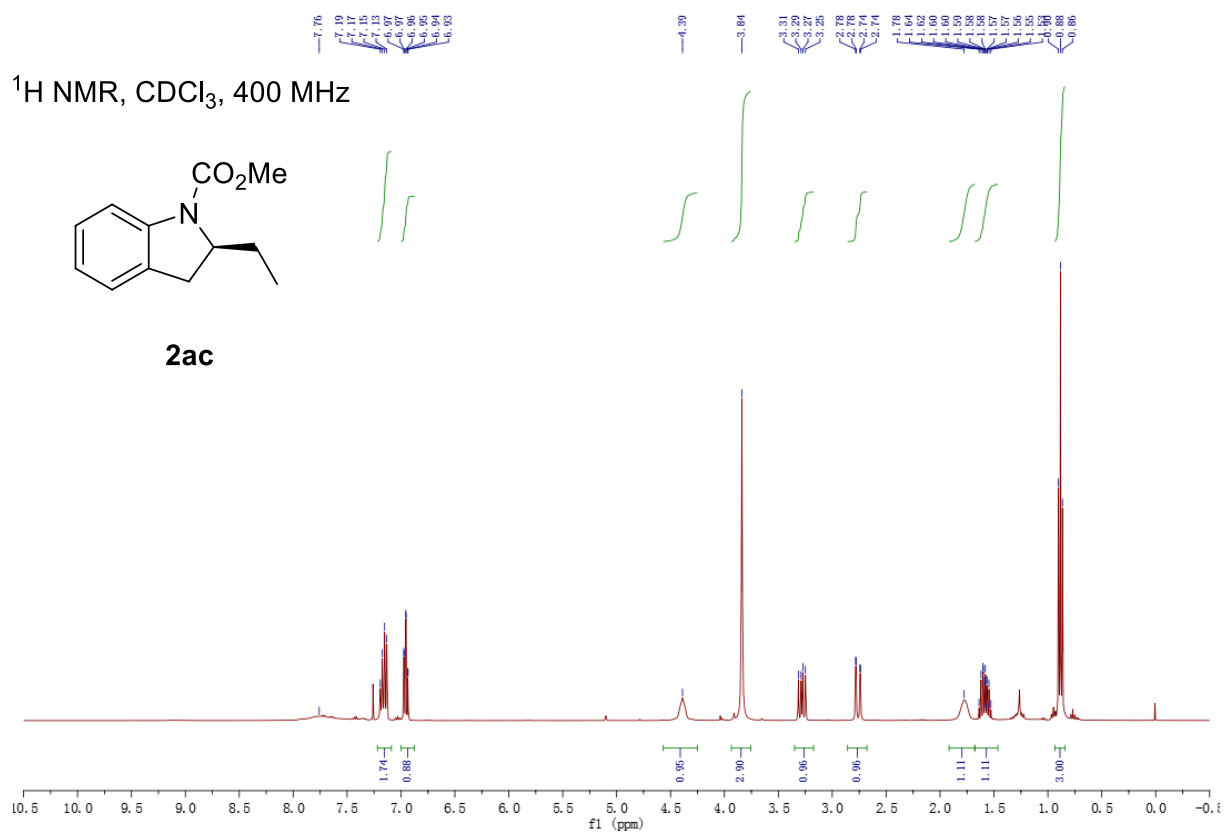

<sup>13</sup>C NMR, CDCl<sub>3</sub>, 101 MHz

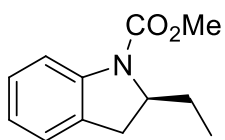

**2ac**

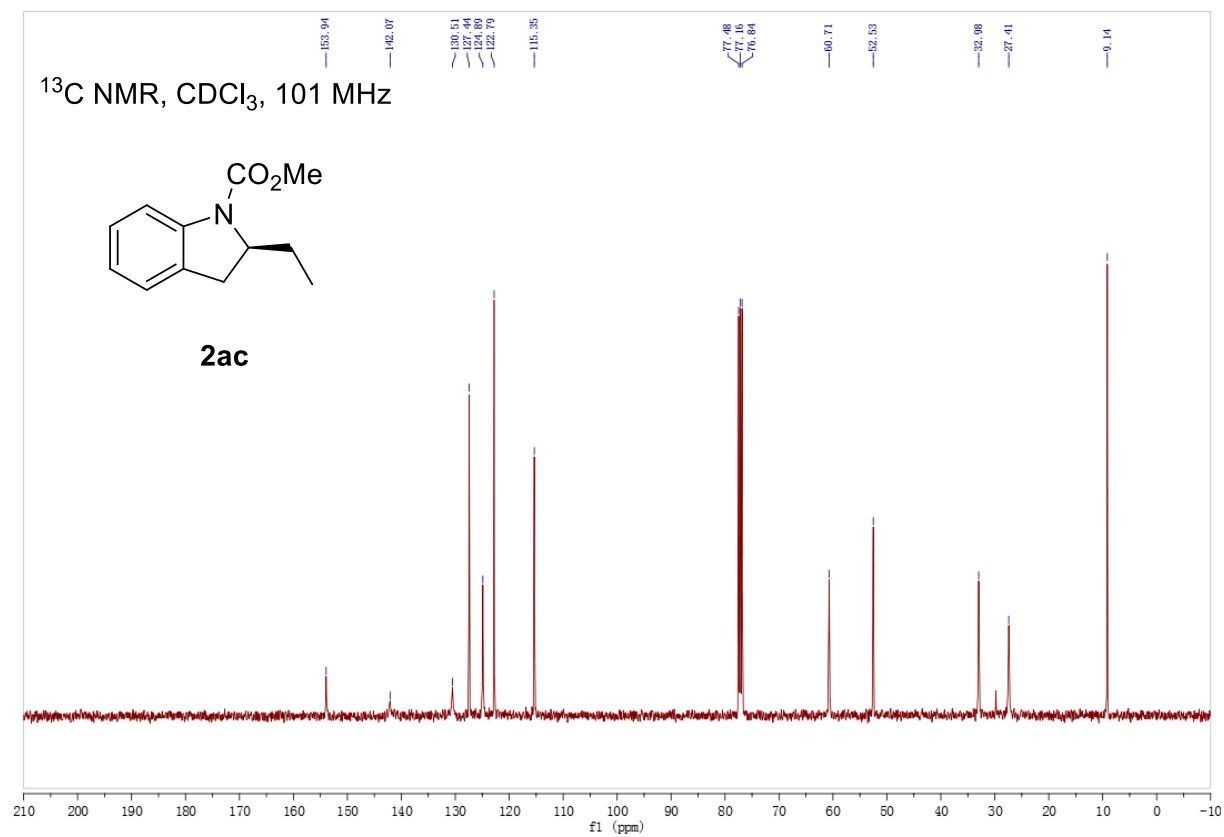



mAU

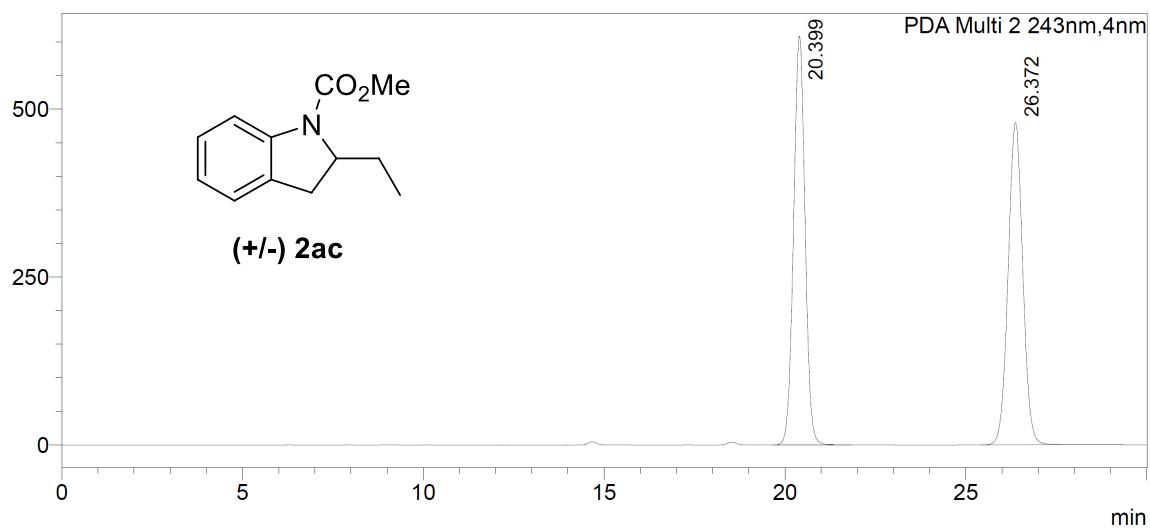

**<Peak Table>**

PDA Ch2 243nm

| Peak# | Ret. Time | Area     | Height% | Area%   |
|-------|-----------|----------|---------|---------|
| 1     | 20.399    | 13408720 | 55.939  | 49.819  |
| 2     | 26.372    | 13505979 | 44.061  | 50.181  |
| Total |           | 26914699 | 100.000 | 100.000 |

mAU

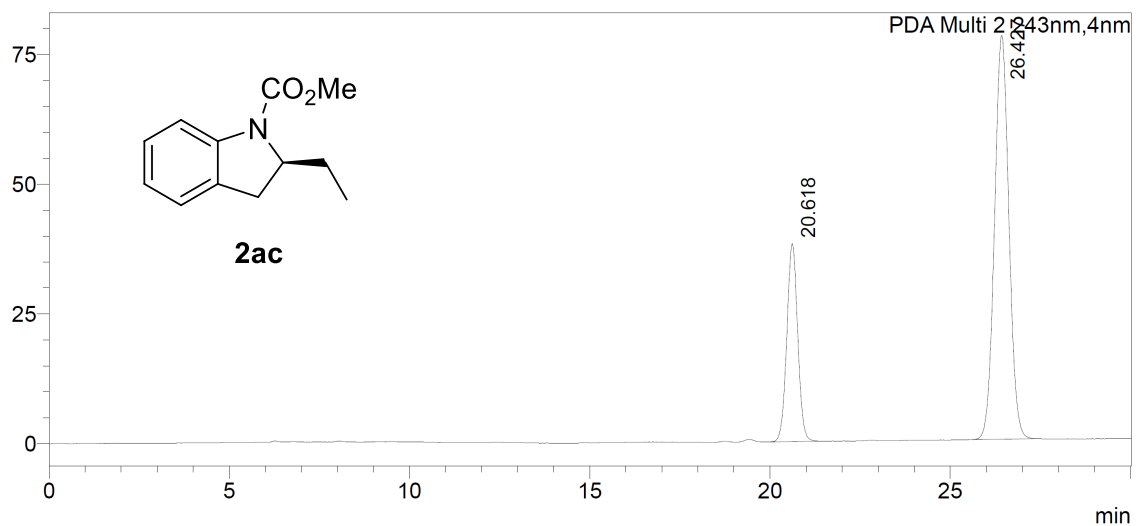

**<Peak Table>**

PDA Ch2 243nm

| Peak# | Ret. Time | Area    | Height | Area%   |
|-------|-----------|---------|--------|---------|
| 1     | 20.618    | 799763  | 38119  | 27.013  |
| 2     | 26.427    | 2160943 | 77798  | 72.987  |
| Total |           | 2960705 | 115917 | 100.000 |

<sup>1</sup>H NMR, CDCl<sub>3</sub>, 400 MHz

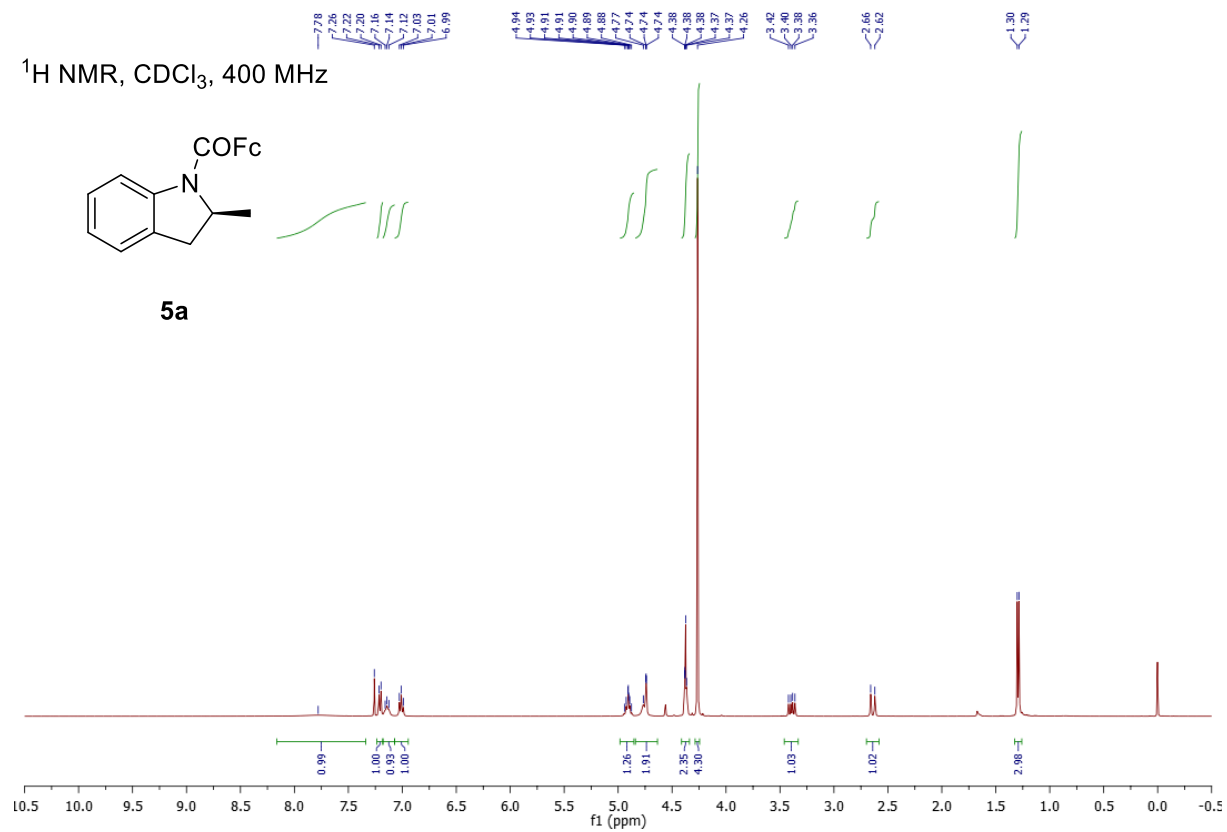

<sup>13</sup>C NMR, CDCl<sub>3</sub>, 101 MHz

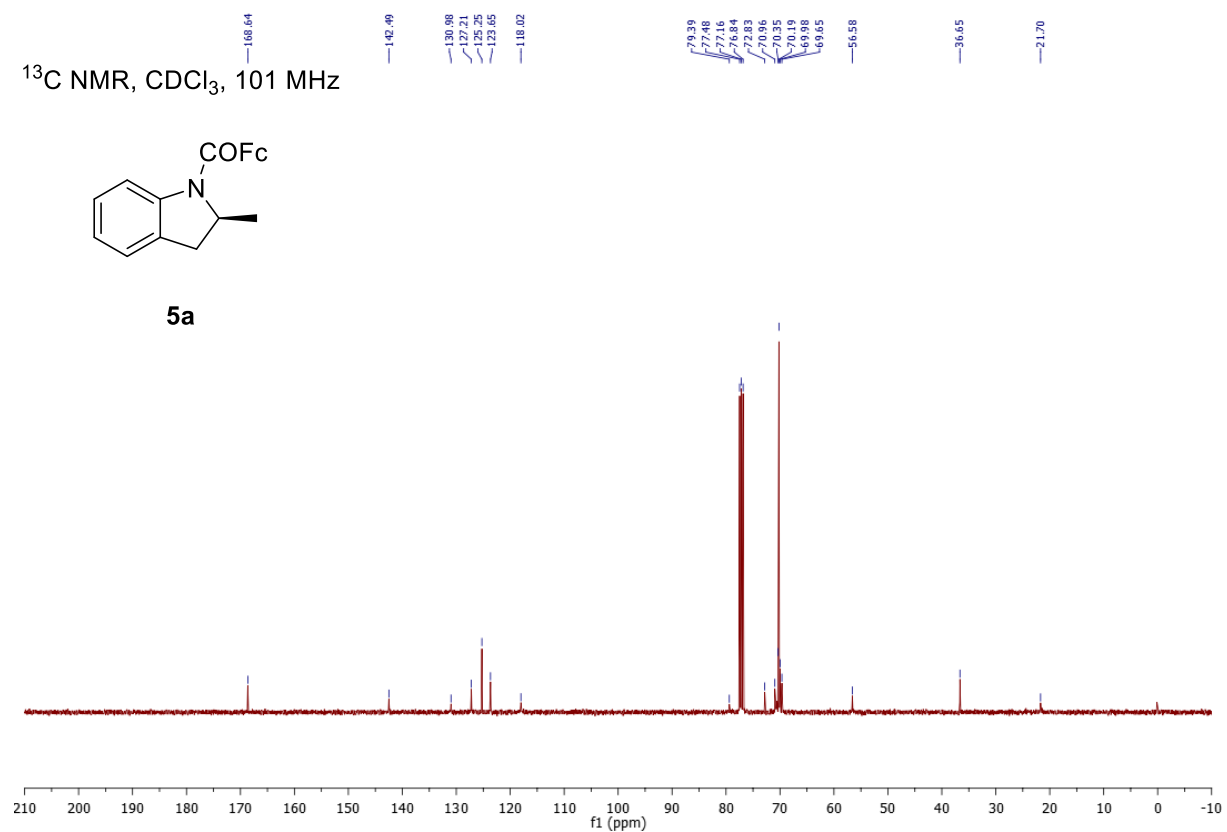

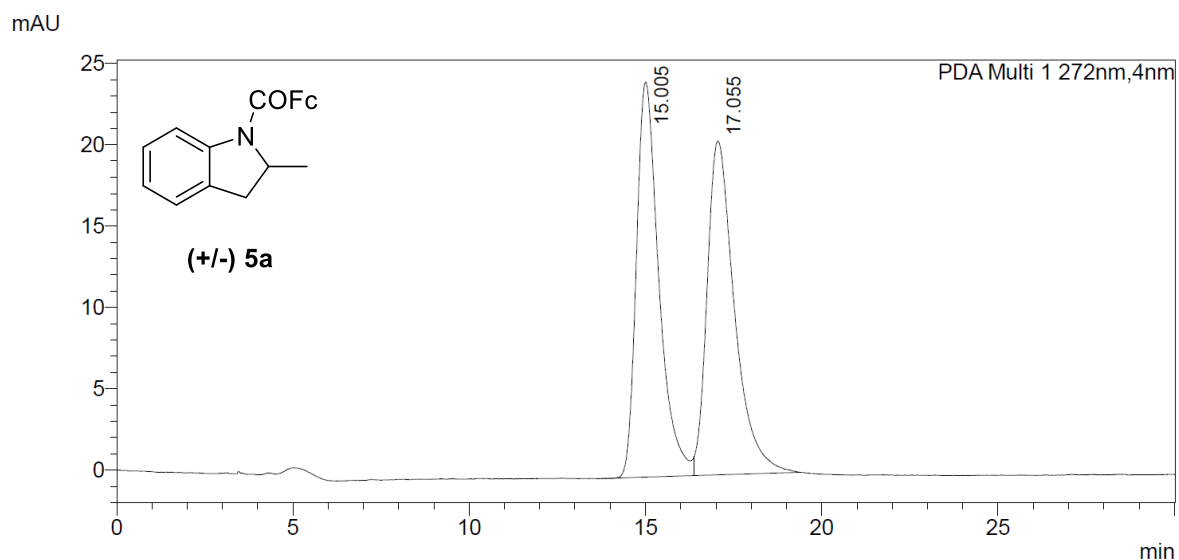

<Peak Table>

PDA Ch1 272nm

| Peak# | Ret. Time | Area    | Height | Area%   |
|-------|-----------|---------|--------|---------|
| 1     | 15.005    | 1079571 | 24285  | 49.315  |
| 2     | 17.055    | 1109556 | 20528  | 50.685  |
| Total |           | 2189126 | 44813  | 100.000 |

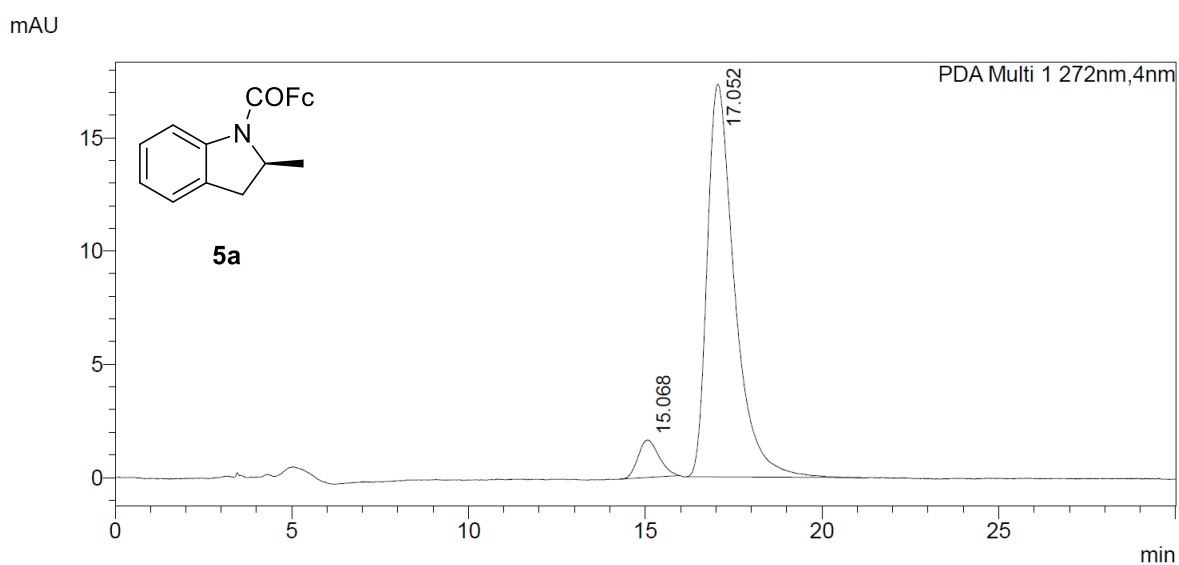

<Peak Table>

PDA Ch1 272nm

| Peak# | Ret. Time | Area    | Height | Area%   |
|-------|-----------|---------|--------|---------|
| 1     | 15.068    | 68103   | 1660   | 6.793   |
| 2     | 17.052    | 934391  | 17339  | 93.207  |
| Total |           | 1002495 | 18999  | 100.000 |

<sup>1</sup>H NMR, CDCl<sub>3</sub>, 400 MHz

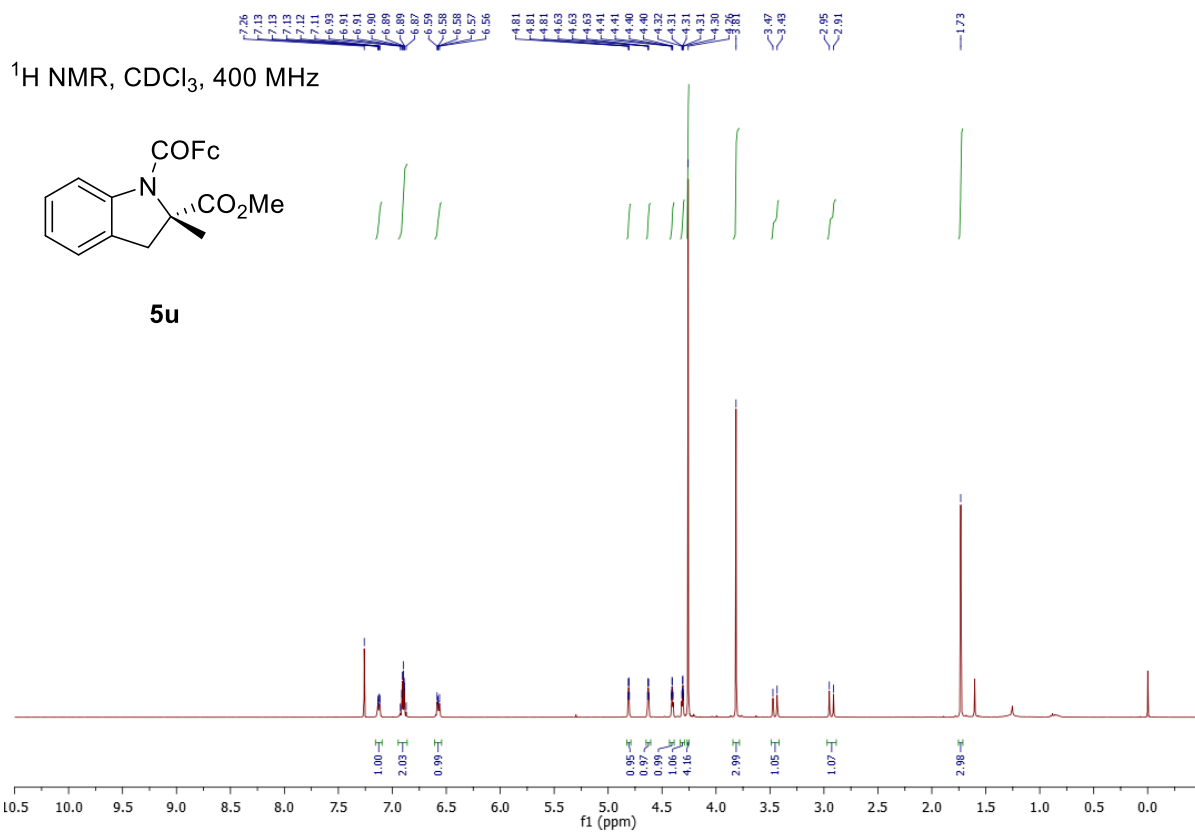

<sup>13</sup>C NMR, CDCl<sub>3</sub>, 101 MHz

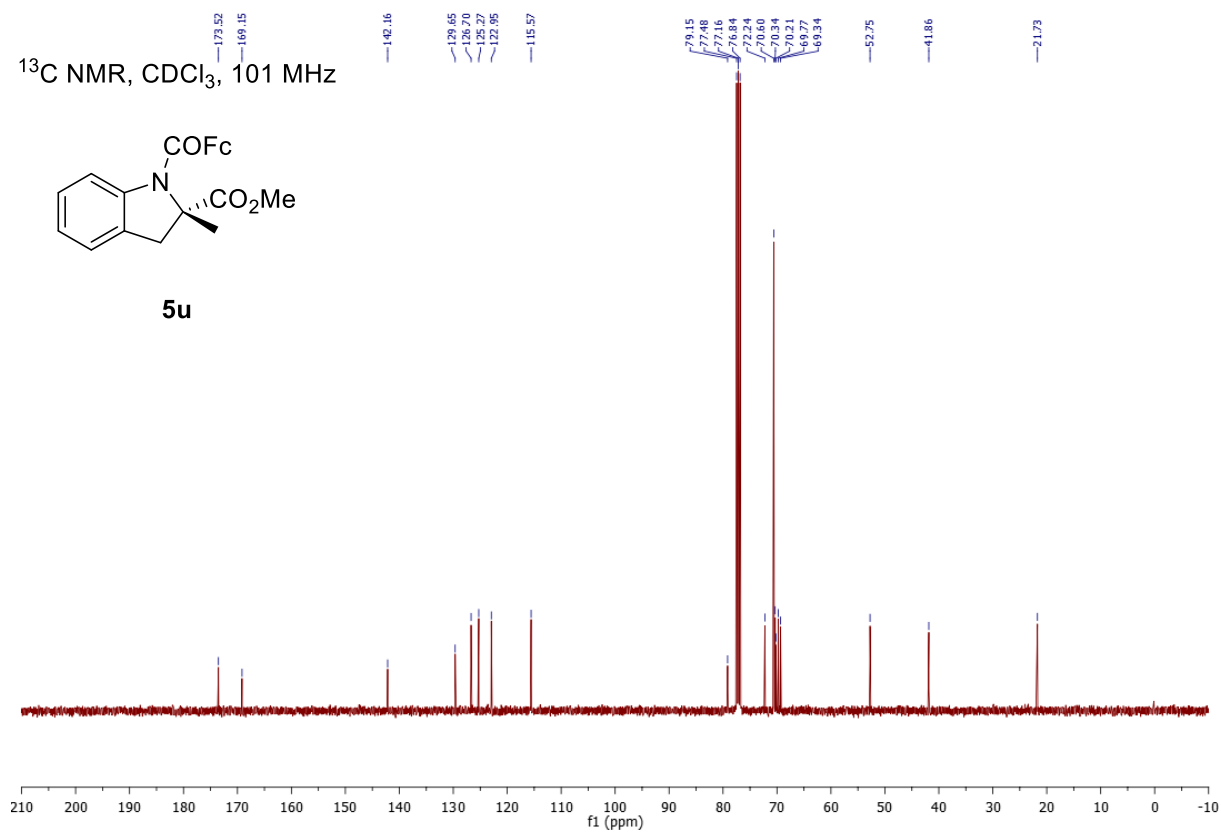

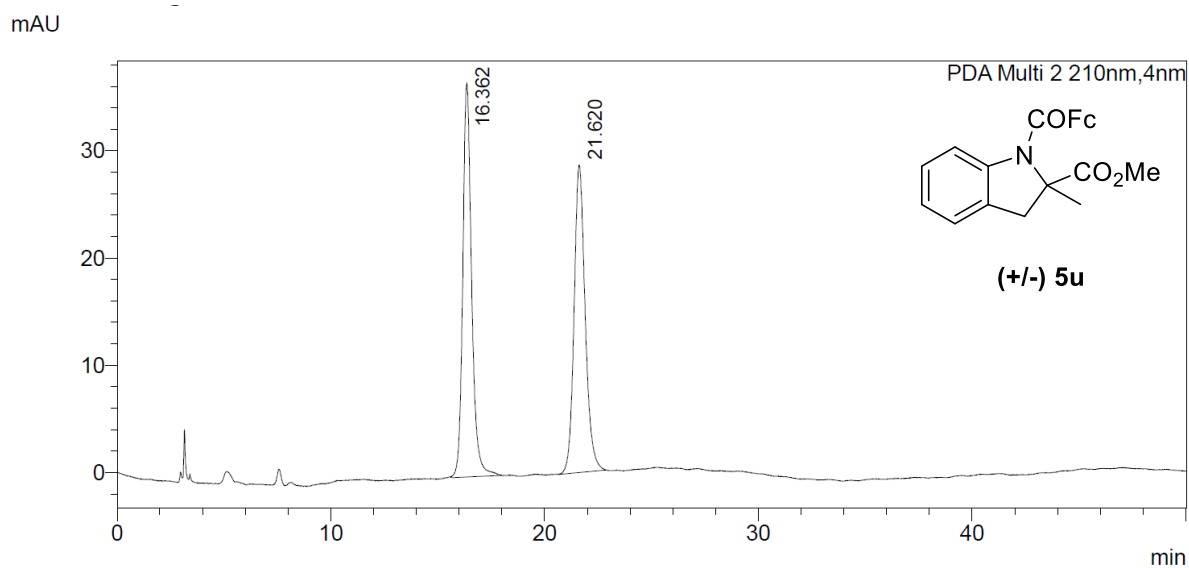

<Peak Table>

PDA Ch2 210nm

| Peak# | Ret. Time | Area    | Height | Area%   |
|-------|-----------|---------|--------|---------|
| 1     | 16.362    | 1055774 | 36701  | 50.551  |
| 2     | 21.620    | 1032763 | 28656  | 49.449  |
| Total |           | 2088537 | 65357  | 100.000 |

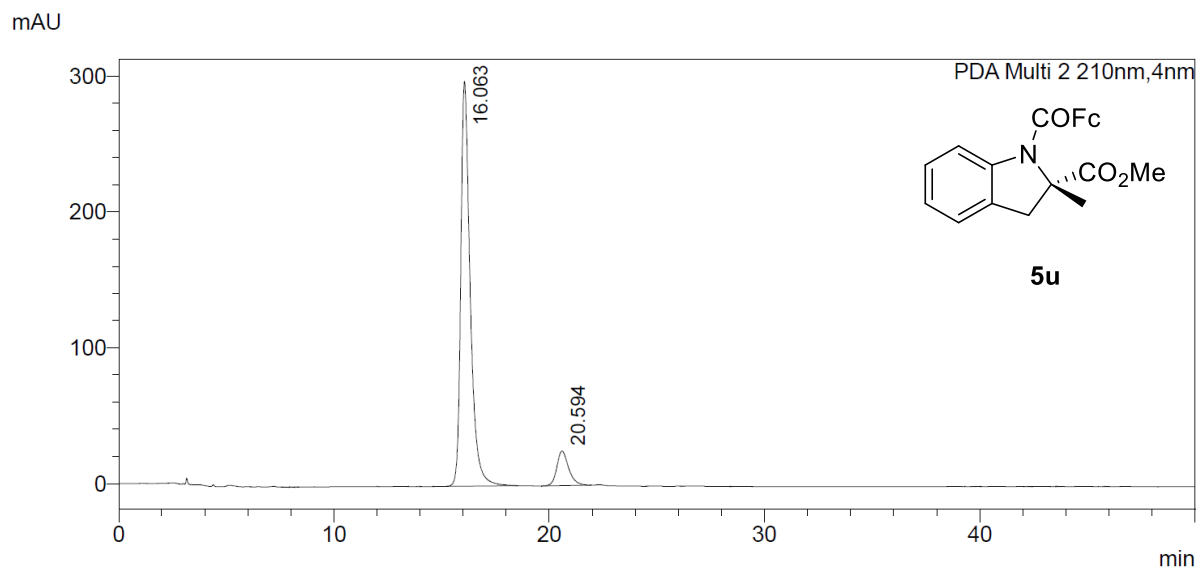

<Peak Table>

PDA Ch2 210nm

| Peak# | Ret. Time | Area     | Height | Area%   |
|-------|-----------|----------|--------|---------|
| 1     | 16.063    | 9039482  | 297723 | 90.238  |
| 2     | 20.594    | 977888   | 25561  | 9.762   |
| Total |           | 10017370 | 323283 | 100.000 |
